# Supplementary material
Source: publisher figshare collection journal article supplement (https://gsajournals.figshare.com/ndownloader/files/13787318)
Supplement: Supplementary file 1 [file 13787318]

## Sheet: amino acid mutations; create
guide: id	transcript: id	aminoacid: position	amino acid mutation	guide+PAM sequence
ENST00000379389|1|+|1014121|1014166|55|(Target-AID;+;@17;NG;CAG:TAG;Q:*;)	ENST00000379389	55	*	CTGCAGGACAGGGTCCCCCTTG
ENST00000624697|1|+|1014121|1014166|47|(Target-AID;+;@17;NG;CAG:TAG;Q:*;)	ENST00000624697	47	*	CTGCAGGACAGGGTCCCCCTTG
ENST00000379370|1|+|1020217|1020262|23|(Target-AID;-;@17;NGG;GTC:ATC;V:I;)	ENST00000379370	23	I	GGACGCACGCGGCCACCACAAGG
ENST00000379370|1|+|1020217|1020262|23|(Target-AID;-;@18;NG;GTC:ATC;V:I;)	ENST00000379370	23	I	GACGCACGCGGCCACCACAAGG
ENST00000379370|1|+|1020217|1020262|23|(Target-AID;-;@17;NG;GTC:ATC;V:I;)	ENST00000379370	23	I	GGACGCACGCGGCCACCACAAG
ENST00000379370|1|+|1022236|1022281|87|(Target-AID;+;@17;NG;GAC:GAT;D:D;)	ENST00000379370	87	D	GGACGGCGGCAACAAGGTGGTG
ENST00000379370|1|+|1040657|1040702|176|(Target-AID;-;@19;NGG;CTG:CTA;L:L;)	ENST00000379370	176	L	ACAGCATTCCCCGGCACGCTGGG
ENST00000379370|1|+|1040657|1040702|176|(Target-AID;-;@18;NGG;CTG:CTA;L:L;)	ENST00000379370	176	L	CACAGCATTCCCCGGCACGCTGG
ENST00000379370|1|+|1040657|1040702|176|(Target-AID;-;@19;NG;CTG:CTA;L:L;)	ENST00000379370	176	L	ACAGCATTCCCCGGCACGCTGG
ENST00000379370|1|+|1040657|1040702|176|(Target-AID;-;@18;NG;CTG:CTA;L:L;)	ENST00000379370	176	L	CACAGCATTCCCCGGCACGCTG
ENST00000379370|1|+|1040657|1040702|176|(Target-AID;+;@17;NG;CTG:TTG;L:L;)	ENST00000379370	176	L	ATGCTGTGCGGCTTCGGCGCCG
ENST00000379370|1|+|1040657|1040702|176|(Target-AID;+;@19;NG;CTG:TTG;L:L;)	ENST00000379370	176	L	GCTGTGCGGCTTCGGCGCCGTG
ENST00000620552|1|+|1040657|1040702|38|(Target-AID;-;@19;NGG;CTG:CTA;L:L;)	ENST00000620552	38	L	ACAGCATTCCCCGGCACGCTGGG
ENST00000620552|1|+|1040657|1040702|38|(Target-AID;-;@18;NGG;CTG:CTA;L:L;)	ENST00000620552	38	L	CACAGCATTCCCCGGCACGCTGG
ENST00000620552|1|+|1040657|1040702|38|(Target-AID;-;@19;NG;CTG:CTA;L:L;)	ENST00000620552	38	L	ACAGCATTCCCCGGCACGCTGG
ENST00000620552|1|+|1040657|1040702|38|(Target-AID;-;@18;NG;CTG:CTA;L:L;)	ENST00000620552	38	L	CACAGCATTCCCCGGCACGCTG
ENST00000620552|1|+|1040657|1040702|38|(Target-AID;+;@17;NG;CTG:TTG;L:L;)	ENST00000620552	38	L	ATGCTGTGCGGCTTCGGCGCCG
ENST00000620552|1|+|1040657|1040702|38|(Target-AID;+;@19;NG;CTG:TTG;L:L;)	ENST00000620552	38	L	GCTGTGCGGCTTCGGCGCCGTG
ENST00000379370|1|+|1041560|1041605|353|(Target-AID;+;@17;NG;CAG:TAG;Q:*;)	ENST00000379370	353	*	CGGCAGGCGCCAGTGTGTGGGG
ENST00000620552|1|+|1041560|1041605|215|(Target-AID;+;@17;NG;CAG:TAG;Q:*;)	ENST00000620552	215	*	CGGCAGGCGCCAGTGTGTGGGG
ENST00000379370|1|+|1041560|1041605|353|(ABE;+;@13;NG;CAG:CGG;Q:R;)	ENST00000379370	353	R	GCCCGGCAGGCGCCAGTGTGTG
ENST00000379370|1|+|1041560|1041605|353|(ABE;+;@14;NG;CAG:CGG;Q:R;)	ENST00000379370	353	R	CCCGGCAGGCGCCAGTGTGTGG
ENST00000379370|1|+|1041560|1041605|353|(ABE;+;@15;NG;CAG:CGG;Q:R;)	ENST00000379370	353	R	CCGGCAGGCGCCAGTGTGTGGG
ENST00000379370|1|+|1041560|1041605|353|(ABE;+;@16;NG;CAG:CGG;Q:R;)	ENST00000379370	353	R	CGGCAGGCGCCAGTGTGTGGGG
ENST00000379370|1|+|1041560|1041605|353|(ABE;+;@13;NGG;CAG:CGG;Q:R;)	ENST00000379370	353	R	GCCCGGCAGGCGCCAGTGTGTGG
ENST00000379370|1|+|1041560|1041605|353|(ABE;+;@14;NGG;CAG:CGG;Q:R;)	ENST00000379370	353	R	CCCGGCAGGCGCCAGTGTGTGGG
ENST00000379370|1|+|1041560|1041605|353|(ABE;+;@15;NGG;CAG:CGG;Q:R;)	ENST00000379370	353	R	CCGGCAGGCGCCAGTGTGTGGGG
ENST00000620552|1|+|1041560|1041605|215|(ABE;+;@13;NG;CAG:CGG;Q:R;)	ENST00000620552	215	R	GCCCGGCAGGCGCCAGTGTGTG
ENST00000620552|1|+|1041560|1041605|215|(ABE;+;@14;NG;CAG:CGG;Q:R;)	ENST00000620552	215	R	CCCGGCAGGCGCCAGTGTGTGG
ENST00000620552|1|+|1041560|1041605|215|(ABE;+;@15;NG;CAG:CGG;Q:R;)	ENST00000620552	215	R	CCGGCAGGCGCCAGTGTGTGGG
ENST00000620552|1|+|1041560|1041605|215|(ABE;+;@16;NG;CAG:CGG;Q:R;)	ENST00000620552	215	R	CGGCAGGCGCCAGTGTGTGGGG
ENST00000620552|1|+|1041560|1041605|215|(ABE;+;@13;NGG;CAG:CGG;Q:R;)	ENST00000620552	215	R	GCCCGGCAGGCGCCAGTGTGTGG
ENST00000620552|1|+|1041560|1041605|215|(ABE;+;@14;NGG;CAG:CGG;Q:R;)	ENST00000620552	215	R	CCCGGCAGGCGCCAGTGTGTGGG
ENST00000620552|1|+|1041560|1041605|215|(ABE;+;@15;NGG;CAG:CGG;Q:R;)	ENST00000620552	215	R	CCGGCAGGCGCCAGTGTGTGGGG
ENST00000379370|1|+|1047319|1047364|1135|(ABE;+;@15;NG;CAG:CGG;Q:R;)	ENST00000379370	1135	R	GTTCCAGGGCGTCCTGGAGCTG
ENST00000379370|1|+|1047319|1047364|1135|(ABE;+;@16;NG;CAG:CGG;Q:R;)	ENST00000379370	1135	R	TTCCAGGGCGTCCTGGAGCTGG
ENST00000379370|1|+|1047319|1047364|1135|(ABE;+;@15;NGG;CAG:CGG;Q:R;)	ENST00000379370	1135	R	GTTCCAGGGCGTCCTGGAGCTGG
ENST00000620552|1|+|1047319|1047364|997|(ABE;+;@15;NG;CAG:CGG;Q:R;)	ENST00000620552	997	R	GTTCCAGGGCGTCCTGGAGCTG
ENST00000620552|1|+|1047319|1047364|997|(ABE;+;@16;NG;CAG:CGG;Q:R;)	ENST00000620552	997	R	TTCCAGGGCGTCCTGGAGCTGG
ENST00000620552|1|+|1047319|1047364|997|(ABE;+;@15;NGG;CAG:CGG;Q:R;)	ENST00000620552	997	R	GTTCCAGGGCGTCCTGGAGCTGG
ENST00000379370|1|+|1047379|1047424|1155|(ABE;-;@14;NG;GCT:GCC;A:A;)	ENST00000379370	1155	A	GGGGTCAGCCATCTCGGGCGTG
ENST00000620552|1|+|1047379|1047424|1017|(ABE;-;@14;NG;GCT:GCC;A:A;)	ENST00000620552	1017	A	GGGGTCAGCCATCTCGGGCGTG
ENST00000379370|1|+|1047602|1047647|1190|(Target-AID;+;@18;NG;CGC:CGT;R:R;)	ENST00000379370	1190	R	CGCTTGCGGGACCTGGGGCCCG
ENST00000379370|1|+|1047602|1047647|1190|(Target-AID;+;@19;NG;CGC:CGT;R:R;)	ENST00000379370	1190	R	GCTTGCGGGACCTGGGGCCCGG
ENST00000379370|1|+|1047602|1047647|1190|(Target-AID;+;@18;NGG;CGC:CGT;R:R;)	ENST00000379370	1190	R	CGCTTGCGGGACCTGGGGCCCGG
ENST00000620552|1|+|1047602|1047647|1052|(Target-AID;+;@18;NG;CGC:CGT;R:R;)	ENST00000620552	1052	R	CGCTTGCGGGACCTGGGGCCCG
ENST00000620552|1|+|1047602|1047647|1052|(Target-AID;+;@19;NG;CGC:CGT;R:R;)	ENST00000620552	1052	R	GCTTGCGGGACCTGGGGCCCGG
ENST00000620552|1|+|1047602|1047647|1052|(Target-AID;+;@18;NGG;CGC:CGT;R:R;)	ENST00000620552	1052	R	CGCTTGCGGGACCTGGGGCCCGG
ENST00000379370|1|+|1047852|1047897|1244|(Target-AID;+;@18;NG;CAC:CAT;H:H;)	ENST00000379370	1244	H	CACGTGCGATTTATGGACTTTG
ENST00000379370|1|+|1047852|1047897|1244|(Target-AID;+;@19;NG;CAC:CAT;H:H;)	ENST00000379370	1244	H	ACGTGCGATTTATGGACTTTGG
ENST00000379370|1|+|1047852|1047897|1244|(Target-AID;+;@18;NGG;CAC:CAT;H:H;)	ENST00000379370	1244	H	CACGTGCGATTTATGGACTTTGG
ENST00000620552|1|+|1047852|1047897|1106|(Target-AID;+;@18;NG;CAC:CAT;H:H;)	ENST00000620552	1106	H	CACGTGCGATTTATGGACTTTG
ENST00000620552|1|+|1047852|1047897|1106|(Target-AID;+;@19;NG;CAC:CAT;H:H;)	ENST00000620552	1106	H	ACGTGCGATTTATGGACTTTGG
ENST00000620552|1|+|1047852|1047897|1106|(Target-AID;+;@18;NGG;CAC:CAT;H:H;)	ENST00000620552	1106	H	CACGTGCGATTTATGGACTTTGG
ENST00000379370|1|+|1048202|1048247|1322|(Target-AID;+;@19;NG;CGG:TGG;R:W;)	ENST00000379370	1322	W	TCGGCCCCCGGCCCCCCAGCAG
ENST00000620552|1|+|1048202|1048247|1184|(Target-AID;+;@19;NG;CGG:TGG;R:W;)	ENST00000620552	1184	W	TCGGCCCCCGGCCCCCCAGCAG
ENST00000379370|1|+|1049767|1049812|1580|(Target-AID;+;@18;NG;CGC:CGT;R:R;)	ENST00000379370	1580	R	CGCGTCGGTGAGGGTGGGGCCG
ENST00000379370|1|+|1049767|1049812|1580|(Target-AID;+;@19;NG;CGC:CGT;R:R;)	ENST00000379370	1580	R	GCGTCGGTGAGGGTGGGGCCGG
ENST00000379370|1|+|1049767|1049812|1580|(Target-AID;+;@18;NGG;CGC:CGT;R:R;)	ENST00000379370	1580	R	CGCGTCGGTGAGGGTGGGGCCGG
ENST00000379370|1|+|1049767|1049812|1580|(Target-AID;+;@19;NGG;CGC:CGT;R:R;)	ENST00000379370	1580	R	GCGTCGGTGAGGGTGGGGCCGGG
ENST00000620552|1|+|1049767|1049812|1442|(Target-AID;+;@18;NG;CGC:CGT;R:R;)	ENST00000620552	1442	R	CGCGTCGGTGAGGGTGGGGCCG
ENST00000620552|1|+|1049767|1049812|1442|(Target-AID;+;@19;NG;CGC:CGT;R:R;)	ENST00000620552	1442	R	GCGTCGGTGAGGGTGGGGCCGG
ENST00000620552|1|+|1049767|1049812|1442|(Target-AID;+;@18;NGG;CGC:CGT;R:R;)	ENST00000620552	1442	R	CGCGTCGGTGAGGGTGGGGCCGG
ENST00000620552|1|+|1049767|1049812|1442|(Target-AID;+;@19;NGG;CGC:CGT;R:R;)	ENST00000620552	1442	R	GCGTCGGTGAGGGTGGGGCCGGG
ENST00000379370|1|+|1050762|1050807|1734|(Target-AID;-;@19;NG;CGC:CAC;R:H;)	ENST00000379370	1734	H	GCGGCCGTTTCGCTCCAGTGAG
ENST00000379370|1|+|1050762|1050807|1734|(Target-AID;-;@17;NG;CGC:CAC;R:H;)	ENST00000379370	1734	H	TTGCGGCCGTTTCGCTCCAGTG
ENST00000620552|1|+|1050762|1050807|1596|(Target-AID;-;@19;NG;CGC:CAC;R:H;)	ENST00000620552	1596	H	GCGGCCGTTTCGCTCCAGTGAG
ENST00000620552|1|+|1050762|1050807|1596|(Target-AID;-;@17;NG;CGC:CAC;R:H;)	ENST00000620552	1596	H	TTGCGGCCGTTTCGCTCCAGTG
ENST00000379370|1|+|1051330|1051375|1785|(Target-AID;-;@19;NG;GAC:AAC;D:N;)	ENST00000379370	1785	N	TCGAAGCCAGAGGACACGGCAG
ENST00000620552|1|+|1051330|1051375|1651|(Target-AID;-;@19;NG;GAC:AAC;D:N;)	ENST00000620552	1651	N	TCGAAGCCAGAGGACACGGCAG
ENST00000379370|1|+|1051333|1051378|1786|(ABE;-;@14;NGG;GGT:GGC;G:G;)	ENST00000379370	1786	G	GATGGCACCGTCGAAGCCAGAGG
ENST00000379370|1|+|1051333|1051378|1786|(ABE;-;@15;NG;GGT:GGC;G:G;)	ENST00000379370	1786	G	ATGGCACCGTCGAAGCCAGAGG
ENST00000379370|1|+|1051333|1051378|1786|(ABE;-;@14;NG;GGT:GGC;G:G;)	ENST00000379370	1786	G	GATGGCACCGTCGAAGCCAGAG
ENST00000620552|1|+|1051333|1051378|1652|(ABE;-;@14;NGG;GGT:GGC;G:G;)	ENST00000620552	1652	G	GATGGCACCGTCGAAGCCAGAGG
ENST00000620552|1|+|1051333|1051378|1652|(ABE;-;@15;NG;GGT:GGC;G:G;)	ENST00000620552	1652	G	ATGGCACCGTCGAAGCCAGAGG
ENST00000620552|1|+|1051333|1051378|1652|(ABE;-;@14;NG;GGT:GGC;G:G;)	ENST00000620552	1652	G	GATGGCACCGTCGAAGCCAGAG
ENST00000379198|1|+|1232257|1232302|1|(ABE;+;@13;NG;ATG:GTG;M:V;)	ENST00000379198	1	V	GGGCGCCATGAAGCTGCTGCGG
ENST00000379198|1|+|1232257|1232302|1|(ABE;+;@15;NG;ATG:GTG;M:V;)	ENST00000379198	1	V	GCGCCATGAAGCTGCTGCGGCG
ENST00000379198|1|+|1232257|1232302|1|(ABE;+;@15;NGG;ATG:GTG;M:V;)	ENST00000379198	1	V	GCGCCATGAAGCTGCTGCGGCGG
ENST00000379198|1|+|1232272|1232317|6|(Target-AID;+;@17;NG;CGG:TGG;R:W;)	ENST00000379198	6	W	CGGCGGGCGTGGCGGCGGCGGG
ENST00000379198|1|+|1232272|1232317|6|(Target-AID;+;@19;NG;CGG:TGG;R:W;)	ENST00000379198	6	W	GCGGGCGTGGCGGCGGCGGGCG
ENST00000379198|1|+|1232272|1232317|6|(Target-AID;+;@19;NGG;CGG:TGG;R:W;)	ENST00000379198	6	W	GCGGGCGTGGCGGCGGCGGGCGG
ENST00000379198|1|+|1232449|1232494|65|(ABE;+;@14;NG;AGC:GGC;S:G;)	ENST00000379198	65	G	GTGGCCAGCGCGCCCCGCGCCG
ENST00000379198|1|+|1232449|1232494|65|(ABE;+;@17;NG;AGC:GGC;S:G;)	ENST00000379198	65	G	GCCAGCGCGCCCCGCGCCGCCG
ENST00000378536|1|+|2228844|2228889|34|(Target-AID;-;@17;NG;GGC:GAC;G:D;)	ENST00000378536	34	D	GGGCCGCCCAGCGAGCTCATGG
ENST00000378536|1|+|2229159|2229204|139|(Target-AID;+;@17;NG;ATC:ATT;I:I;)	ENST00000378536	139	I	GATCAACGCGGTGTGCGACGAG
ENST00000378536|1|+|2303362|2303407|399|(Target-AID;+;@17;NG;GCC:GTC;A:V;)	ENST00000378536	399	V	CGGCCCTCATCCGAGACAGGTG
ENST00000378536|1|+|2304387|2304432|531|(ABE;-;@16;NGG;CCT:CCC;P:P;)	ENST00000378536	531	P	CGGCAGGGGCCGCAGCATCAGGG
ENST00000378536|1|+|2304387|2304432|531|(ABE;-;@15;NGG;CCT:CCC;P:P;)	ENST00000378536	531	P	TCGGCAGGGGCCGCAGCATCAGG
ENST00000378536|1|+|2304387|2304432|531|(ABE;-;@17;NG;CCT:CCC;P:P;)	ENST00000378536	531	P	GGCAGGGGCCGCAGCATCAGGG
ENST00000378536|1|+|2304387|2304432|531|(ABE;-;@16;NG;CCT:CCC;P:P;)	ENST00000378536	531	P	CGGCAGGGGCCGCAGCATCAGG
ENST00000378536|1|+|2304387|2304432|531|(ABE;-;@15;NG;CCT:CCC;P:P;)	ENST00000378536	531	P	TCGGCAGGGGCCGCAGCATCAG
ENST00000270722|1|+|3414593|3414638|887|(ABE;-;@16;NGG;CTG:CCG;L:P;)	ENST00000270722	887	P	CCGCAGGTACTTCTCCTTCAGGG
ENST00000270722|1|+|3414593|3414638|887|(ABE;-;@15;NGG;CTG:CCG;L:P;)	ENST00000270722	887	P	GCCGCAGGTACTTCTCCTTCAGG
ENST00000270722|1|+|3414593|3414638|887|(ABE;-;@16;NG;CTG:CCG;L:P;)	ENST00000270722	887	P	CCGCAGGTACTTCTCCTTCAGG
ENST00000270722|1|+|3414593|3414638|887|(ABE;-;@15;NG;CTG:CCG;L:P;)	ENST00000270722	887	P	GCCGCAGGTACTTCTCCTTCAG
ENST00000378391|1|+|3414593|3414638|887|(ABE;-;@16;NGG;CTG:CCG;L:P;)	ENST00000378391	887	P	CCGCAGGTACTTCTCCTTCAGGG
ENST00000378391|1|+|3414593|3414638|887|(ABE;-;@15;NGG;CTG:CCG;L:P;)	ENST00000378391	887	P	GCCGCAGGTACTTCTCCTTCAGG
ENST00000378391|1|+|3414593|3414638|887|(ABE;-;@16;NG;CTG:CCG;L:P;)	ENST00000378391	887	P	CCGCAGGTACTTCTCCTTCAGG
ENST00000378391|1|+|3414593|3414638|887|(ABE;-;@15;NG;CTG:CCG;L:P;)	ENST00000378391	887	P	GCCGCAGGTACTTCTCCTTCAG
ENST00000511072|1|+|3414593|3414638|888|(ABE;-;@16;NGG;CTG:CCG;L:P;)	ENST00000511072	888	P	CCGCAGGTACTTCTCCTTCAGGG
ENST00000511072|1|+|3414593|3414638|888|(ABE;-;@15;NGG;CTG:CCG;L:P;)	ENST00000511072	888	P	GCCGCAGGTACTTCTCCTTCAGG
ENST00000511072|1|+|3414593|3414638|888|(ABE;-;@16;NG;CTG:CCG;L:P;)	ENST00000511072	888	P	CCGCAGGTACTTCTCCTTCAGG
ENST00000511072|1|+|3414593|3414638|888|(ABE;-;@15;NG;CTG:CCG;L:P;)	ENST00000511072	888	P	GCCGCAGGTACTTCTCCTTCAG
ENST00000514189|1|+|3414593|3414638|887|(ABE;-;@16;NGG;CTG:CCG;L:P;)	ENST00000514189	887	P	CCGCAGGTACTTCTCCTTCAGGG
ENST00000514189|1|+|3414593|3414638|887|(ABE;-;@15;NGG;CTG:CCG;L:P;)	ENST00000514189	887	P	GCCGCAGGTACTTCTCCTTCAGG
ENST00000514189|1|+|3414593|3414638|887|(ABE;-;@16;NG;CTG:CCG;L:P;)	ENST00000514189	887	P	CCGCAGGTACTTCTCCTTCAGG
ENST00000514189|1|+|3414593|3414638|887|(ABE;-;@15;NG;CTG:CCG;L:P;)	ENST00000514189	887	P	GCCGCAGGTACTTCTCCTTCAG
ENST00000270722|1|+|3432107|3432152|1229|(ABE;-;@15;NG;GCT:GCC;A:A;)	ENST00000270722	1229	A	TTCTTAGCCTGCCTGCACAGTG
ENST00000270722|1|+|3432107|3432152|1229|(ABE;-;@13;NG;GCT:GCC;A:A;)	ENST00000270722	1229	A	GGTTCTTAGCCTGCCTGCACAG
ENST00000378391|1|+|3432107|3432152|1229|(ABE;-;@15;NG;GCT:GCC;A:A;)	ENST00000378391	1229	A	TTCTTAGCCTGCCTGCACAGTG
ENST00000378391|1|+|3432107|3432152|1229|(ABE;-;@13;NG;GCT:GCC;A:A;)	ENST00000378391	1229	A	GGTTCTTAGCCTGCCTGCACAG
ENST00000264126|1|+|108897570|108897615|127|(Target-AID;+;@18;NG;CGA:TGA;R:*;)	ENST00000264126	127	*	AGCGACACCTAGATATTTCCAG
ENST00000406462|1|+|108897570|108897615|127|(Target-AID;+;@18;NG;CGA:TGA;R:*;)	ENST00000406462	127	*	AGCGACACCTAGATATTTCCAG
ENST00000642355|1|+|108897570|108897615|127|(Target-AID;+;@18;NG;CGA:TGA;R:*;)	ENST00000642355	127	*	AGCGACACCTAGATATTTCCAG
ENST00000256578|1|+|109629464|109629509|674|(Target-AID;-;@17;NG;CGC:CAC;R:H;)	ENST00000256578	674	H	CTGCGCAGGTGGTTCAACATGG
ENST00000342115|1|+|109629464|109629509|593|(Target-AID;-;@17;NG;CGC:CAC;R:H;)	ENST00000342115	593	H	CTGCGCAGGTGGTTCAACATGG
ENST00000358729|1|+|109629464|109629509|599|(Target-AID;-;@17;NG;CGC:CAC;R:H;)	ENST00000358729	599	H	CTGCGCAGGTGGTTCAACATGG
ENST00000393688|1|+|109629464|109629509|555|(Target-AID;-;@17;NG;CGC:CAC;R:H;)	ENST00000393688	555	H	CTGCGCAGGTGGTTCAACATGG
ENST00000528454|1|+|109629464|109629509|556|(Target-AID;-;@17;NG;CGC:CAC;R:H;)	ENST00000528454	556	H	CTGCGCAGGTGGTTCAACATGG
ENST00000528667|1|+|109629464|109629509|674|(Target-AID;-;@17;NG;CGC:CAC;R:H;)	ENST00000528667	674	H	CTGCGCAGGTGGTTCAACATGG
ENST00000256592|1|+|115033434|115033479|32|(Target-AID;-;@19;NG;GAA:AAA;E:K;)	ENST00000256592	32	K	TCGATGTGCATTGTATACTCAG
ENST00000369517|1|+|115033434|115033479|32|(Target-AID;-;@19;NG;GAA:AAA;E:K;)	ENST00000369517	32	K	TCGATGTGCATTGTATACTCAG
ENST00000310260|1|+|115664149|115664194|239|(Target-AID;-;@18;NG;GTC:ATC;V:I;)	ENST00000310260	239	I	GACGATGGCCAGGTAATGGATG
ENST00000355485|1|+|115664149|115664194|239|(Target-AID;-;@18;NG;GTC:ATC;V:I;)	ENST00000355485	239	I	GACGATGGCCAGGTAATGGATG
ENST00000369509|1|+|115664149|115664194|239|(Target-AID;-;@18;NG;GTC:ATC;V:I;)	ENST00000369509	239	I	GACGATGGCCAGGTAATGGATG
ENST00000369510|1|+|115664149|115664194|237|(Target-AID;-;@18;NG;GTC:ATC;V:I;)	ENST00000369510	237	I	GACGATGGCCAGGTAATGGATG
ENST00000369416|1|+|119422596|119422641|373|(ABE;+;@15;NG;TGA:TGG;*:W;)	ENST00000369416	373	W	CAGTGATTTAAGGATGACAGAG
ENST00000543831|1|+|119422596|119422641|373|(ABE;+;@15;NG;TGA:TGG;*:W;)	ENST00000543831	373	W	CAGTGATTTAAGGATGACAGAG
ENST00000369409|1|+|119726845|119726890|125|(Target-AID;+;@17;NG;ACG:ATG;T:M;)	ENST00000369409	125	M	CGACGGCTTCGATGAAGGACGG
ENST00000641023|1|+|119726845|119726890|125|(Target-AID;+;@17;NG;ACG:ATG;T:M;)	ENST00000641023	125	M	CGACGGCTTCGATGAAGGACGG
ENST00000641074|1|+|119726845|119726890|125|(Target-AID;+;@17;NG;ACG:ATG;T:M;)	ENST00000641074	125	M	CGACGGCTTCGATGAAGGACGG
ENST00000641115|1|+|119726845|119726890|125|(Target-AID;+;@17;NG;ACG:ATG;T:M;)	ENST00000641115	125	M	CGACGGCTTCGATGAAGGACGG
ENST00000641597|1|+|119726845|119726890|125|(Target-AID;+;@17;NG;ACG:ATG;T:M;)	ENST00000641597	125	M	CGACGGCTTCGATGAAGGACGG
ENST00000641947|1|+|119726845|119726890|125|(Target-AID;+;@17;NG;ACG:ATG;T:M;)	ENST00000641947	125	M	CGACGGCTTCGATGAAGGACGG
ENST00000369409|1|+|119726875|119726920|135|(Target-AID;+;@17;NG;CGG:TGG;R:W;)	ENST00000369409	135	W	GAGCGGAAGAAGGTGAGCAGCG
ENST00000369409|1|+|119726875|119726920|135|(Target-AID;+;@18;NG;CGG:TGG;R:W;)	ENST00000369409	135	W	AGCGGAAGAAGGTGAGCAGCGG
ENST00000369409|1|+|119726875|119726920|135|(Target-AID;+;@17;NGG;CGG:TGG;R:W;)	ENST00000369409	135	W	GAGCGGAAGAAGGTGAGCAGCGG
ENST00000641023|1|+|119726875|119726920|135|(Target-AID;+;@17;NG;CGG:TGG;R:W;)	ENST00000641023	135	W	GAGCGGAAGAAGGTGAGCAGCG
ENST00000641023|1|+|119726875|119726920|135|(Target-AID;+;@18;NG;CGG:TGG;R:W;)	ENST00000641023	135	W	AGCGGAAGAAGGTGAGCAGCGG
ENST00000641023|1|+|119726875|119726920|135|(Target-AID;+;@17;NGG;CGG:TGG;R:W;)	ENST00000641023	135	W	GAGCGGAAGAAGGTGAGCAGCGG
ENST00000641074|1|+|119726875|119726920|135|(Target-AID;+;@17;NG;CGG:TGG;R:W;)	ENST00000641074	135	W	GAGCGGAAGAAGGTGAGCAGCG
ENST00000641074|1|+|119726875|119726920|135|(Target-AID;+;@18;NG;CGG:TGG;R:W;)	ENST00000641074	135	W	AGCGGAAGAAGGTGAGCAGCGG
ENST00000641074|1|+|119726875|119726920|135|(Target-AID;+;@17;NGG;CGG:TGG;R:W;)	ENST00000641074	135	W	GAGCGGAAGAAGGTGAGCAGCGG
ENST00000641115|1|+|119726875|119726920|135|(Target-AID;+;@17;NG;CGG:TGG;R:W;)	ENST00000641115	135	W	GAGCGGAAGAAGGTGAGCAGCG
ENST00000641115|1|+|119726875|119726920|135|(Target-AID;+;@18;NG;CGG:TGG;R:W;)	ENST00000641115	135	W	AGCGGAAGAAGGTGAGCAGCGG
ENST00000641115|1|+|119726875|119726920|135|(Target-AID;+;@17;NGG;CGG:TGG;R:W;)	ENST00000641115	135	W	GAGCGGAAGAAGGTGAGCAGCGG
ENST00000641597|1|+|119726875|119726920|135|(Target-AID;+;@17;NG;CGG:TGG;R:W;)	ENST00000641597	135	W	GAGCGGAAGAAGGTGAGCAGCG
ENST00000641597|1|+|119726875|119726920|135|(Target-AID;+;@18;NG;CGG:TGG;R:W;)	ENST00000641597	135	W	AGCGGAAGAAGGTGAGCAGCGG
ENST00000641597|1|+|119726875|119726920|135|(Target-AID;+;@17;NGG;CGG:TGG;R:W;)	ENST00000641597	135	W	GAGCGGAAGAAGGTGAGCAGCGG
ENST00000641947|1|+|119726875|119726920|135|(Target-AID;+;@17;NG;CGG:TGG;R:W;)	ENST00000641947	135	W	GAGCGGAAGAAGGTGAGCAGCG
ENST00000641947|1|+|119726875|119726920|135|(Target-AID;+;@18;NG;CGG:TGG;R:W;)	ENST00000641947	135	W	AGCGGAAGAAGGTGAGCAGCGG
ENST00000641947|1|+|119726875|119726920|135|(Target-AID;+;@17;NGG;CGG:TGG;R:W;)	ENST00000641947	135	W	GAGCGGAAGAAGGTGAGCAGCGG
ENST00000369409|1|+|119742848|119742893|425|(Target-AID;-;@18;NG;GTG:ATG;V:M;)	ENST00000369409	425	M	CACGGCCAGGAGGCATTCCCCG
ENST00000641023|1|+|119742848|119742893|425|(Target-AID;-;@18;NG;GTG:ATG;V:M;)	ENST00000641023	425	M	CACGGCCAGGAGGCATTCCCCG
ENST00000641074|1|+|119742847|119742892|381|(Target-AID;-;@18;NG;CGT:CAT;R:H;)	ENST00000641074	381	H	CACGGCCAGGAGGCATTCCCCG
ENST00000641115|1|+|119742848|119742893|337|(Target-AID;-;@18;NG;GTG:ATG;V:M;)	ENST00000641115	337	M	CACGGCCAGGAGGCATTCCCCG
ENST00000641597|1|+|119742848|119742893|425|(Target-AID;-;@18;NG;GTG:ATG;V:M;)	ENST00000641597	425	M	CACGGCCAGGAGGCATTCCCCG
ENST00000641947|1|+|119742848|119742893|418|(Target-AID;-;@18;NG;GTG:ATG;V:M;)	ENST00000641947	418	M	CACGGCCAGGAGGCATTCCCCG
ENST00000369409|1|+|119743883|119743928|496|(Target-AID;-;@18;NG;CGT:CAT;R:H;)	ENST00000369409	496	H	CACGCCTGCCTCTGCCAGGAGG
ENST00000641023|1|+|119743884|119743929|490|(Target-AID;-;@18;NG;GTG:ATG;V:M;)	ENST00000641023	490	M	CACGCCTGCCTCTGCCAGGAGG
ENST00000641115|1|+|119743884|119743929|402|(Target-AID;-;@18;NG;GTG:ATG;V:M;)	ENST00000641115	402	M	CACGCCTGCCTCTGCCAGGAGG
ENST00000641597|1|+|119743884|119743929|490|(Target-AID;-;@18;NG;GTG:ATG;V:M;)	ENST00000641597	490	M	CACGCCTGCCTCTGCCAGGAGG
ENST00000641947|1|+|119743884|119743929|483|(Target-AID;-;@18;NG;GTG:ATG;V:M;)	ENST00000641947	483	M	CACGCCTGCCTCTGCCAGGAGG
ENST00000369235|1|+|147908051|147908096|40|(Target-AID;+;@17;NG;GCC:GTC;A:V;)	ENST00000369235	40	V	CGGCCGCAGAGTTCGTGTGGGG
ENST00000369235|1|+|147908051|147908096|40|(Target-AID;+;@17;NGG;GCC:GTC;A:V;)	ENST00000369235	40	V	CGGCCGCAGAGTTCGTGTGGGGG
ENST00000369235|1|+|147908075|147908120|48|(Target-AID;-;@19;NG;GAG:AAG;E:K;)	ENST00000369235	48	K	TCATCCCCCCACACGAACTCTG
ENST00000369235|1|+|147908318|147908363|129|(Target-AID;-;@18;NG;GTC:ATC;V:I;)	ENST00000369235	129	I	GACGCTGCCCTGGTCCGGGCCG
ENST00000369168|1|+|149784202|149784247|92|(Target-AID;+;@19;NG;CGA:TGA;R:*;)	ENST00000369168	92	*	GCGAAGTGACCCCATACAGCTG
ENST00000369168|1|+|149784202|149784247|92|(Target-AID;+;@19;NGG;CGA:TGA;R:*;)	ENST00000369168	92	*	GCGAAGTGACCCCATACAGCTGG
ENST00000369128|1|+|150081344|150081389|133|(Target-AID;-;@19;NG;GAA:AAA;E:K;)	ENST00000369128	133	K	TCGTGGACCATGGCCTGATATG
ENST00000369130|1|+|150081344|150081389|238|(Target-AID;-;@19;NG;GAA:AAA;E:K;)	ENST00000369130	238	K	TCGTGGACCATGGCCTGATATG
ENST00000535106|1|+|150081344|150081389|133|(Target-AID;-;@19;NG;GAA:AAA;E:K;)	ENST00000535106	133	K	TCGTGGACCATGGCCTGATATG
ENST00000611412|1|+|150081344|150081389|115|(Target-AID;-;@19;NG;GAA:AAA;E:K;)	ENST00000611412	115	K	TCGTGGACCATGGCCTGATATG
ENST00000643970|1|+|150081344|150081389|202|(Target-AID;-;@19;NG;GAA:AAA;E:K;)	ENST00000643970	202	K	TCGTGGACCATGGCCTGATATG
ENST00000644510|1|+|150081344|150081389|238|(Target-AID;-;@19;NG;GAA:AAA;E:K;)	ENST00000644510	238	K	TCGTGGACCATGGCCTGATATG
ENST00000644526|1|+|150081344|150081389|238|(Target-AID;-;@19;NG;GAA:AAA;E:K;)	ENST00000644526	238	K	TCGTGGACCATGGCCTGATATG
ENST00000369054|1|+|150504647|150504692|456|(Target-AID;+;@19;NG;CGA:TGA;R:*;)	ENST00000369054	456	*	CCGAGCAGTGCTCGGTTCTGTG
ENST00000369054|1|+|150504647|150504692|456|(Target-AID;+;@19;NGG;CGA:TGA;R:*;)	ENST00000369054	456	*	CCGAGCAGTGCTCGGTTCTGTGG
ENST00000369064|1|+|150504647|150504692|586|(Target-AID;+;@19;NG;CGA:TGA;R:*;)	ENST00000369064	586	*	CCGAGCAGTGCTCGGTTCTGTG
ENST00000369064|1|+|150504647|150504692|586|(Target-AID;+;@19;NGG;CGA:TGA;R:*;)	ENST00000369064	586	*	CCGAGCAGTGCTCGGTTCTGTGG
ENST00000438568|1|+|150504647|150504692|311|(Target-AID;+;@19;NG;CGA:TGA;R:*;)	ENST00000438568	311	*	CCGAGCAGTGCTCGGTTCTGTG
ENST00000438568|1|+|150504647|150504692|311|(Target-AID;+;@19;NGG;CGA:TGA;R:*;)	ENST00000438568	311	*	CCGAGCAGTGCTCGGTTCTGTGG
ENST00000606933|1|+|150504647|150504692|504|(Target-AID;+;@19;NG;CGA:TGA;R:*;)	ENST00000606933	504	*	CCGAGCAGTGCTCGGTTCTGTG
ENST00000606933|1|+|150504647|150504692|504|(Target-AID;+;@19;NGG;CGA:TGA;R:*;)	ENST00000606933	504	*	CCGAGCAGTGCTCGGTTCTGTGG
ENST00000369047|1|+|150511453|150511498|243|(ABE;+;@14;NG;CGA:CGG;R:R;)	ENST00000369047	243	R	GAGCCGATTCTGTGAGGCCGAG
ENST00000369049|1|+|150511453|150511498|270|(ABE;+;@14;NG;CGA:CGG;R:R;)	ENST00000369049	270	R	GAGCCGATTCTGTGAGGCCGAG
ENST00000369047|1|+|150511552|150511597|276|(Target-AID;+;@19;NG;CAG:TAG;Q:*;)	ENST00000369047	276	*	CCAGCCACACTACCAGCTCCGG
ENST00000369047|1|+|150511552|150511597|276|(Target-AID;+;@19;NGG;CAG:TAG;Q:*;)	ENST00000369047	276	*	CCAGCCACACTACCAGCTCCGGG
ENST00000369049|1|+|150511552|150511597|303|(Target-AID;+;@19;NG;CAG:TAG;Q:*;)	ENST00000369049	303	*	CCAGCCACACTACCAGCTCCGG
ENST00000369049|1|+|150511552|150511597|303|(Target-AID;+;@19;NGG;CAG:TAG;Q:*;)	ENST00000369049	303	*	CCAGCCACACTACCAGCTCCGGG
ENST00000369047|1|+|150511762|150511807|346|(Target-AID;+;@19;NG;CAG:TAG;Q:*;)	ENST00000369047	346	*	CCAGCGCTGCTGCCGCCAGGGG
ENST00000369049|1|+|150511762|150511807|373|(Target-AID;+;@19;NG;CAG:TAG;Q:*;)	ENST00000369049	373	*	CCAGCGCTGCTGCCGCCAGGGG
ENST00000271643|1|+|150553218|150553263|141|(Target-AID;+;@17;NG;CGA:TGA;R:*;)	ENST00000271643	141	*	ATTCGAGCGGCCAGGAGGTGAG
ENST00000271643|1|+|150553218|150553263|141|(Target-AID;+;@19;NG;CGA:TGA;R:*;)	ENST00000271643	141	*	TCGAGCGGCCAGGAGGTGAGAG
ENST00000271643|1|+|150553218|150553263|141|(Target-AID;+;@19;NGG;CGA:TGA;R:*;)	ENST00000271643	141	*	TCGAGCGGCCAGGAGGTGAGAGG
ENST00000369038|1|+|150553218|150553263|141|(Target-AID;+;@17;NG;CGA:TGA;R:*;)	ENST00000369038	141	*	ATTCGAGCGGCCAGGAGGTGAG
ENST00000369038|1|+|150553218|150553263|141|(Target-AID;+;@19;NG;CGA:TGA;R:*;)	ENST00000369038	141	*	TCGAGCGGCCAGGAGGTGAGAG
ENST00000369038|1|+|150553218|150553263|141|(Target-AID;+;@19;NGG;CGA:TGA;R:*;)	ENST00000369038	141	*	TCGAGCGGCCAGGAGGTGAGAGG
ENST00000369039|1|+|150553218|150553263|141|(Target-AID;+;@17;NG;CGA:TGA;R:*;)	ENST00000369039	141	*	ATTCGAGCGGCCAGGAGGTGAG
ENST00000369039|1|+|150553218|150553263|141|(Target-AID;+;@19;NG;CGA:TGA;R:*;)	ENST00000369039	141	*	TCGAGCGGCCAGGAGGTGAGAG
ENST00000369039|1|+|150553218|150553263|141|(Target-AID;+;@19;NGG;CGA:TGA;R:*;)	ENST00000369039	141	*	TCGAGCGGCCAGGAGGTGAGAGG
ENST00000369041|1|+|150553218|150553263|141|(Target-AID;+;@17;NG;CGA:TGA;R:*;)	ENST00000369041	141	*	ATTCGAGCGGCCAGGAGGTGAG
ENST00000369041|1|+|150553218|150553263|141|(Target-AID;+;@19;NG;CGA:TGA;R:*;)	ENST00000369041	141	*	TCGAGCGGCCAGGAGGTGAGAG
ENST00000369041|1|+|150553218|150553263|141|(Target-AID;+;@19;NGG;CGA:TGA;R:*;)	ENST00000369041	141	*	TCGAGCGGCCAGGAGGTGAGAGG
ENST00000271643|1|+|150557274|150557319|670|(Target-AID;+;@18;NG;CGA:TGA;R:*;)	ENST00000271643	670	*	AACGAGTGGGACACTCTGCATG
ENST00000369038|1|+|150557274|150557319|670|(Target-AID;+;@18;NG;CGA:TGA;R:*;)	ENST00000369038	670	*	AACGAGTGGGACACTCTGCATG
ENST00000369039|1|+|150557274|150557319|693|(Target-AID;+;@18;NG;CGA:TGA;R:*;)	ENST00000369039	693	*	AACGAGTGGGACACTCTGCATG
ENST00000369041|1|+|150557274|150557319|670|(Target-AID;+;@18;NG;CGA:TGA;R:*;)	ENST00000369041	670	*	AACGAGTGGGACACTCTGCATG
ENST00000271620|1|+|151018628|151018673|106|(Target-AID;-;@17;NG;GAC:AAC;D:N;)	ENST00000271620	106	N	GGTCGACAAGGATGAGGGTGAG
ENST00000271620|1|+|151024635|151024680|128|(Target-AID;-;@17;NG;CGA:CAA;R:Q;)	ENST00000271620	128	Q	GGTCGATGGTCTAGCACCTCTG
ENST00000271620|1|+|151028878|151028923|297|(Target-AID;+;@18;NG;CGG:TGG;R:W;)	ENST00000271620	297	W	TGCGGCAGTTGGCTATTTTCTG
ENST00000368936|1|+|151028878|151028923|115|(Target-AID;+;@18;NG;CGG:TGG;R:W;)	ENST00000368936	115	W	TGCGGCAGTTGGCTATTTTCTG
ENST00000375949|1|+|15440492|15440537|52|(Target-AID;+;@17;NG;AAC:AAT;N:N;)	ENST00000375949	52	N	GAACGACACGTGGAGGCATACG
ENST00000375949|1|+|15440492|15440537|52|(Target-AID;+;@19;NG;AAC:AAT;N:N;)	ENST00000375949	52	N	ACGACACGTGGAGGCATACGTG
ENST00000375949|1|+|15440555|15440600|73|(Target-AID;-;@18;NG;GCC:ACC;A:T;)	ENST00000375949	73	T	GGCGGCAGTGAGGACGAAGTTG
ENST00000375943|1|+|15442478|15442523|32|(Target-AID;+;@18;NG;ACG:ATG;T:M;)	ENST00000375943	32	M	GACGAAGAAGGATCCCTGTTTG
ENST00000375949|1|+|15442477|15442522|95|(Target-AID;+;@18;NG;GAC:GAT;D:D;)	ENST00000375949	95	D	GACGAAGAAGGATCCCTGTTTG
ENST00000375949|1|+|15445638|15445683|235|(Target-AID;-;@18;NGG;GTC:ATC;V:I;)	ENST00000375949	235	I	GACGATGCCAAACACCTCCCAGG
ENST00000375949|1|+|15445638|15445683|235|(Target-AID;-;@19;NG;GTC:ATC;V:I;)	ENST00000375949	235	I	ACGATGCCAAACACCTCCCAGG
ENST00000375949|1|+|15445638|15445683|235|(Target-AID;-;@18;NG;GTC:ATC;V:I;)	ENST00000375949	235	I	GACGATGCCAAACACCTCCCAG
ENST00000331433|1|+|16027410|16027455|260|(Target-AID;+;@19;NG;CAG:TAG;Q:*;)	ENST00000331433	260	*	GCAGGGTGAGCCCCCTGGGCTG
ENST00000375692|1|+|16027410|16027455|260|(Target-AID;+;@19;NG;CAG:TAG;Q:*;)	ENST00000375692	260	*	GCAGGGTGAGCCCCCTGGGCTG
ENST00000439316|1|+|16027410|16027455|217|(Target-AID;+;@19;NG;CAG:TAG;Q:*;)	ENST00000439316	217	*	GCAGGGTGAGCCCCCTGGGCTG
ENST00000375679|1|+|16047894|16047939|124|(Target-AID;+;@19;NG;CCG:CTG;P:L;)	ENST00000375679	124	L	CCGGAGGTGAAGACCATGTTGG
ENST00000619181|1|+|16047894|16047939|124|(Target-AID;+;@19;NG;CCG:CTG;P:L;)	ENST00000619181	124	L	CCGGAGGTGAAGACCATGTTGG
ENST00000375667|1|+|16055439|16055484|426|(Target-AID;+;@19;NG;CGA:TGA;R:*;)	ENST00000375667	426	*	GCGAAGGGCCCAGCTGGTGCAG
ENST00000375667|1|+|16055439|16055484|426|(Target-AID;+;@19;NGG;CGA:TGA;R:*;)	ENST00000375667	426	*	GCGAAGGGCCCAGCTGGTGCAGG
ENST00000375679|1|+|16055439|16055484|595|(Target-AID;+;@19;NG;CGA:TGA;R:*;)	ENST00000375679	595	*	GCGAAGGGCCCAGCTGGTGCAG
ENST00000375679|1|+|16055439|16055484|595|(Target-AID;+;@19;NGG;CGA:TGA;R:*;)	ENST00000375679	595	*	GCGAAGGGCCCAGCTGGTGCAGG
ENST00000619609|1|+|17392099|17392144|324|(Target-AID;+;@17;NG;CAG:TAG;Q:*;)	ENST00000619609	324	*	CTGCAGCTGCAGGGTTTTGTGG
ENST00000619609|1|+|17394019|17394064|381|(Target-AID;+;@19;NG;CAG:TAG;Q:*;)	ENST00000619609	381	*	TCAGGCCGCCGATCTCGATGAG
ENST00000361221|1|+|17697164|17697209|1216|(Target-AID;-;@18;NGG;GAC:AAC;D:N;)	ENST00000361221	1216	N	GTCGTCGGCCATCTCGTAAATGG
ENST00000361221|1|+|17697164|17697209|1216|(Target-AID;-;@19;NG;GAC:AAC;D:N;)	ENST00000361221	1216	N	TCGTCGGCCATCTCGTAAATGG
ENST00000361221|1|+|17697164|17697209|1216|(Target-AID;-;@18;NG;GAC:AAC;D:N;)	ENST00000361221	1216	N	GTCGTCGGCCATCTCGTAAATG
ENST00000375408|1|+|17697164|17697209|989|(Target-AID;-;@18;NGG;GAC:AAC;D:N;)	ENST00000375408	989	N	GTCGTCGGCCATCTCGTAAATGG
ENST00000375408|1|+|17697164|17697209|989|(Target-AID;-;@19;NG;GAC:AAC;D:N;)	ENST00000375408	989	N	TCGTCGGCCATCTCGTAAATGG
ENST00000375408|1|+|17697164|17697209|989|(Target-AID;-;@18;NG;GAC:AAC;D:N;)	ENST00000375408	989	N	GTCGTCGGCCATCTCGTAAATG
ENST00000375415|1|+|17697164|17697209|1177|(Target-AID;-;@18;NGG;GAC:AAC;D:N;)	ENST00000375415	1177	N	GTCGTCGGCCATCTCGTAAATGG
ENST00000375415|1|+|17697164|17697209|1177|(Target-AID;-;@19;NG;GAC:AAC;D:N;)	ENST00000375415	1177	N	TCGTCGGCCATCTCGTAAATGG
ENST00000375415|1|+|17697164|17697209|1177|(Target-AID;-;@18;NG;GAC:AAC;D:N;)	ENST00000375415	1177	N	GTCGTCGGCCATCTCGTAAATG
ENST00000368476|1|+|154571723|154571768|308|(ABE;-;@13;NG;GTC:GCC;V:A;)	ENST00000368476	308	A	GAAGGTGACAAGCACCATGGTG
ENST00000637900|1|+|154571723|154571768|310|(ABE;-;@13;NG;GTC:GCC;V:A;)	ENST00000637900	310	A	GAAGGTGACAAGCACCATGGTG
ENST00000245564|1|+|155612888|155612933|345|(Target-AID;+;@17;NG;CGC:TGC;R:C;)	ENST00000245564	345	C	TATCGCCTGTGTTCCTCTCCAG
ENST00000368341|1|+|155612888|155612933|310|(Target-AID;+;@17;NG;CGC:TGC;R:C;)	ENST00000368341	310	C	TATCGCCTGTGTTCCTCTCCAG
ENST00000347559|1|+|156114972|156115017|26|(Target-AID;+;@17;NG;ATC:ATT;I:I;)	ENST00000347559	26	I	CATCACCCGGCTGCAGGAGAAG
ENST00000347559|1|+|156114972|156115017|26|(Target-AID;+;@18;NG;ATC:ATT;I:I;)	ENST00000347559	26	I	ATCACCCGGCTGCAGGAGAAGG
ENST00000347559|1|+|156114972|156115017|26|(Target-AID;+;@17;NGG;ATC:ATT;I:I;)	ENST00000347559	26	I	CATCACCCGGCTGCAGGAGAAGG
ENST00000361308|1|+|156114972|156115017|26|(Target-AID;+;@17;NG;ATC:ATT;I:I;)	ENST00000361308	26	I	CATCACCCGGCTGCAGGAGAAG
ENST00000361308|1|+|156114972|156115017|26|(Target-AID;+;@18;NG;ATC:ATT;I:I;)	ENST00000361308	26	I	ATCACCCGGCTGCAGGAGAAGG
ENST00000361308|1|+|156114972|156115017|26|(Target-AID;+;@17;NGG;ATC:ATT;I:I;)	ENST00000361308	26	I	CATCACCCGGCTGCAGGAGAAGG
ENST00000368299|1|+|156114972|156115017|26|(Target-AID;+;@17;NG;ATC:ATT;I:I;)	ENST00000368299	26	I	CATCACCCGGCTGCAGGAGAAG
ENST00000368299|1|+|156114972|156115017|26|(Target-AID;+;@18;NG;ATC:ATT;I:I;)	ENST00000368299	26	I	ATCACCCGGCTGCAGGAGAAGG
ENST00000368299|1|+|156114972|156115017|26|(Target-AID;+;@17;NGG;ATC:ATT;I:I;)	ENST00000368299	26	I	CATCACCCGGCTGCAGGAGAAGG
ENST00000368300|1|+|156114972|156115017|26|(Target-AID;+;@17;NG;ATC:ATT;I:I;)	ENST00000368300	26	I	CATCACCCGGCTGCAGGAGAAG
ENST00000368300|1|+|156114972|156115017|26|(Target-AID;+;@18;NG;ATC:ATT;I:I;)	ENST00000368300	26	I	ATCACCCGGCTGCAGGAGAAGG
ENST00000368300|1|+|156114972|156115017|26|(Target-AID;+;@17;NGG;ATC:ATT;I:I;)	ENST00000368300	26	I	CATCACCCGGCTGCAGGAGAAGG
ENST00000368301|1|+|156114972|156115017|26|(Target-AID;+;@17;NG;ATC:ATT;I:I;)	ENST00000368301	26	I	CATCACCCGGCTGCAGGAGAAG
ENST00000368301|1|+|156114972|156115017|26|(Target-AID;+;@18;NG;ATC:ATT;I:I;)	ENST00000368301	26	I	ATCACCCGGCTGCAGGAGAAGG
ENST00000368301|1|+|156114972|156115017|26|(Target-AID;+;@17;NGG;ATC:ATT;I:I;)	ENST00000368301	26	I	CATCACCCGGCTGCAGGAGAAGG
ENST00000347559|1|+|156114999|156115044|35|(ABE;-;@15;NG;CTG:CCG;L:P;)	ENST00000347559	35	P	CCTGCAGGTCCTCCTTCTCCTG
ENST00000361308|1|+|156114999|156115044|35|(ABE;-;@15;NG;CTG:CCG;L:P;)	ENST00000361308	35	P	CCTGCAGGTCCTCCTTCTCCTG
ENST00000368299|1|+|156114999|156115044|35|(ABE;-;@15;NG;CTG:CCG;L:P;)	ENST00000368299	35	P	CCTGCAGGTCCTCCTTCTCCTG
ENST00000368300|1|+|156114999|156115044|35|(ABE;-;@15;NG;CTG:CCG;L:P;)	ENST00000368300	35	P	CCTGCAGGTCCTCCTTCTCCTG
ENST00000368301|1|+|156114999|156115044|35|(ABE;-;@15;NG;CTG:CCG;L:P;)	ENST00000368301	35	P	CCTGCAGGTCCTCCTTCTCCTG
ENST00000347559|1|+|156115017|156115062|41|(Target-AID;-;@18;NGG;CGC:CAC;R:H;)	ENST00000347559	41	H	AGCGATCATTGAGCTCCTGCAGG
ENST00000347559|1|+|156115017|156115062|41|(Target-AID;-;@19;NG;CGC:CAC;R:H;)	ENST00000347559	41	H	GCGATCATTGAGCTCCTGCAGG
ENST00000347559|1|+|156115017|156115062|41|(Target-AID;-;@18;NG;CGC:CAC;R:H;)	ENST00000347559	41	H	AGCGATCATTGAGCTCCTGCAG
ENST00000361308|1|+|156115017|156115062|41|(Target-AID;-;@18;NGG;CGC:CAC;R:H;)	ENST00000361308	41	H	AGCGATCATTGAGCTCCTGCAGG
ENST00000361308|1|+|156115017|156115062|41|(Target-AID;-;@19;NG;CGC:CAC;R:H;)	ENST00000361308	41	H	GCGATCATTGAGCTCCTGCAGG
ENST00000361308|1|+|156115017|156115062|41|(Target-AID;-;@18;NG;CGC:CAC;R:H;)	ENST00000361308	41	H	AGCGATCATTGAGCTCCTGCAG
ENST00000368299|1|+|156115017|156115062|41|(Target-AID;-;@18;NGG;CGC:CAC;R:H;)	ENST00000368299	41	H	AGCGATCATTGAGCTCCTGCAGG
ENST00000368299|1|+|156115017|156115062|41|(Target-AID;-;@19;NG;CGC:CAC;R:H;)	ENST00000368299	41	H	GCGATCATTGAGCTCCTGCAGG
ENST00000368299|1|+|156115017|156115062|41|(Target-AID;-;@18;NG;CGC:CAC;R:H;)	ENST00000368299	41	H	AGCGATCATTGAGCTCCTGCAG
ENST00000368300|1|+|156115017|156115062|41|(Target-AID;-;@18;NGG;CGC:CAC;R:H;)	ENST00000368300	41	H	AGCGATCATTGAGCTCCTGCAGG
ENST00000368300|1|+|156115017|156115062|41|(Target-AID;-;@19;NG;CGC:CAC;R:H;)	ENST00000368300	41	H	GCGATCATTGAGCTCCTGCAGG
ENST00000368300|1|+|156115017|156115062|41|(Target-AID;-;@18;NG;CGC:CAC;R:H;)	ENST00000368300	41	H	AGCGATCATTGAGCTCCTGCAG
ENST00000368301|1|+|156115017|156115062|41|(Target-AID;-;@18;NGG;CGC:CAC;R:H;)	ENST00000368301	41	H	AGCGATCATTGAGCTCCTGCAGG
ENST00000368301|1|+|156115017|156115062|41|(Target-AID;-;@19;NG;CGC:CAC;R:H;)	ENST00000368301	41	H	GCGATCATTGAGCTCCTGCAGG
ENST00000368301|1|+|156115017|156115062|41|(Target-AID;-;@18;NG;CGC:CAC;R:H;)	ENST00000368301	41	H	AGCGATCATTGAGCTCCTGCAG
ENST00000347559|1|+|156115086|156115131|64|(Target-AID;+;@19;NG;ACC:ACT;T:T;)	ENST00000347559	64	T	CCGAGTCTGAAGAGGTGGTCAG
ENST00000361308|1|+|156115086|156115131|64|(Target-AID;+;@19;NG;ACC:ACT;T:T;)	ENST00000361308	64	T	CCGAGTCTGAAGAGGTGGTCAG
ENST00000368299|1|+|156115086|156115131|64|(Target-AID;+;@19;NG;ACC:ACT;T:T;)	ENST00000368299	64	T	CCGAGTCTGAAGAGGTGGTCAG
ENST00000368300|1|+|156115086|156115131|64|(Target-AID;+;@19;NG;ACC:ACT;T:T;)	ENST00000368300	64	T	CCGAGTCTGAAGAGGTGGTCAG
ENST00000368301|1|+|156115086|156115131|64|(Target-AID;+;@19;NG;ACC:ACT;T:T;)	ENST00000368301	64	T	CCGAGTCTGAAGAGGTGGTCAG
ENST00000347559|1|+|156115140|156115185|82|(Target-AID;-;@18;NGG;GAG:AAG;E:K;)	ENST00000347559	82	K	CTCGTAGGCGGCCTTGATGCCGG
ENST00000347559|1|+|156115140|156115185|82|(Target-AID;-;@19;NG;GAG:AAG;E:K;)	ENST00000347559	82	K	TCGTAGGCGGCCTTGATGCCGG
ENST00000347559|1|+|156115140|156115185|82|(Target-AID;-;@18;NG;GAG:AAG;E:K;)	ENST00000347559	82	K	CTCGTAGGCGGCCTTGATGCCG
ENST00000361308|1|+|156115140|156115185|82|(Target-AID;-;@18;NGG;GAG:AAG;E:K;)	ENST00000361308	82	K	CTCGTAGGCGGCCTTGATGCCGG
ENST00000361308|1|+|156115140|156115185|82|(Target-AID;-;@19;NG;GAG:AAG;E:K;)	ENST00000361308	82	K	TCGTAGGCGGCCTTGATGCCGG
ENST00000361308|1|+|156115140|156115185|82|(Target-AID;-;@18;NG;GAG:AAG;E:K;)	ENST00000361308	82	K	CTCGTAGGCGGCCTTGATGCCG
ENST00000368299|1|+|156115140|156115185|82|(Target-AID;-;@18;NGG;GAG:AAG;E:K;)	ENST00000368299	82	K	CTCGTAGGCGGCCTTGATGCCGG
ENST00000368299|1|+|156115140|156115185|82|(Target-AID;-;@19;NG;GAG:AAG;E:K;)	ENST00000368299	82	K	TCGTAGGCGGCCTTGATGCCGG
ENST00000368299|1|+|156115140|156115185|82|(Target-AID;-;@18;NG;GAG:AAG;E:K;)	ENST00000368299	82	K	CTCGTAGGCGGCCTTGATGCCG
ENST00000368300|1|+|156115140|156115185|82|(Target-AID;-;@18;NGG;GAG:AAG;E:K;)	ENST00000368300	82	K	CTCGTAGGCGGCCTTGATGCCGG
ENST00000368300|1|+|156115140|156115185|82|(Target-AID;-;@19;NG;GAG:AAG;E:K;)	ENST00000368300	82	K	TCGTAGGCGGCCTTGATGCCGG
ENST00000368300|1|+|156115140|156115185|82|(Target-AID;-;@18;NG;GAG:AAG;E:K;)	ENST00000368300	82	K	CTCGTAGGCGGCCTTGATGCCG
ENST00000368301|1|+|156115140|156115185|82|(Target-AID;-;@18;NGG;GAG:AAG;E:K;)	ENST00000368301	82	K	CTCGTAGGCGGCCTTGATGCCGG
ENST00000368301|1|+|156115140|156115185|82|(Target-AID;-;@19;NG;GAG:AAG;E:K;)	ENST00000368301	82	K	TCGTAGGCGGCCTTGATGCCGG
ENST00000368301|1|+|156115140|156115185|82|(Target-AID;-;@18;NG;GAG:AAG;E:K;)	ENST00000368301	82	K	CTCGTAGGCGGCCTTGATGCCG
ENST00000347559|1|+|156115161|156115206|89|(Target-AID;-;@17;NG;CGC:CAC;R:H;)	ENST00000347559	89	H	TTGCGGGCATCCCCGAGCTCGG
ENST00000361308|1|+|156115161|156115206|89|(Target-AID;-;@17;NG;CGC:CAC;R:H;)	ENST00000361308	89	H	TTGCGGGCATCCCCGAGCTCGG
ENST00000368299|1|+|156115161|156115206|89|(Target-AID;-;@17;NG;CGC:CAC;R:H;)	ENST00000368299	89	H	TTGCGGGCATCCCCGAGCTCGG
ENST00000368300|1|+|156115161|156115206|89|(Target-AID;-;@17;NG;CGC:CAC;R:H;)	ENST00000368300	89	H	TTGCGGGCATCCCCGAGCTCGG
ENST00000368301|1|+|156115161|156115206|89|(Target-AID;-;@17;NG;CGC:CAC;R:H;)	ENST00000368301	89	H	TTGCGGGCATCCCCGAGCTCGG
ENST00000347559|1|+|156115224|156115269|110|(Target-AID;-;@18;NG;CGT:CAT;R:H;)	ENST00000347559	110	H	CACGCACTTTGCTCAGCTCCAG
ENST00000361308|1|+|156115224|156115269|110|(Target-AID;-;@18;NG;CGT:CAT;R:H;)	ENST00000361308	110	H	CACGCACTTTGCTCAGCTCCAG
ENST00000368299|1|+|156115224|156115269|110|(Target-AID;-;@18;NG;CGT:CAT;R:H;)	ENST00000368299	110	H	CACGCACTTTGCTCAGCTCCAG
ENST00000368300|1|+|156115224|156115269|110|(Target-AID;-;@18;NG;CGT:CAT;R:H;)	ENST00000368300	110	H	CACGCACTTTGCTCAGCTCCAG
ENST00000368301|1|+|156115224|156115269|110|(Target-AID;-;@18;NG;CGT:CAT;R:H;)	ENST00000368301	110	H	CACGCACTTTGCTCAGCTCCAG
ENST00000347559|1|+|156130635|156130680|133|(Target-AID;-;@19;NG;CGG:CAG;R:Q;)	ENST00000347559	133	Q	CCGAGCCTGAGCAGCTATCAGG
ENST00000361308|1|+|156130635|156130680|133|(Target-AID;-;@19;NG;CGG:CAG;R:Q;)	ENST00000361308	133	Q	CCGAGCCTGAGCAGCTATCAGG
ENST00000368297|1|+|156130635|156130680|52|(Target-AID;-;@19;NG;CGG:CAG;R:Q;)	ENST00000368297	52	Q	CCGAGCCTGAGCAGCTATCAGG
ENST00000368299|1|+|156130635|156130680|133|(Target-AID;-;@19;NG;CGG:CAG;R:Q;)	ENST00000368299	133	Q	CCGAGCCTGAGCAGCTATCAGG
ENST00000368300|1|+|156130635|156130680|133|(Target-AID;-;@19;NG;CGG:CAG;R:Q;)	ENST00000368300	133	Q	CCGAGCCTGAGCAGCTATCAGG
ENST00000368301|1|+|156130635|156130680|133|(Target-AID;-;@19;NG;CGG:CAG;R:Q;)	ENST00000368301	133	Q	CCGAGCCTGAGCAGCTATCAGG
ENST00000448611|1|+|156130635|156130680|21|(Target-AID;-;@19;NG;CGG:CAG;R:Q;)	ENST00000448611	21	Q	CCGAGCCTGAGCAGCTATCAGG
ENST00000473598|1|+|156130635|156130680|34|(Target-AID;-;@19;NG;CGG:CAG;R:Q;)	ENST00000473598	34	Q	CCGAGCCTGAGCAGCTATCAGG
ENST00000347559|1|+|156130665|156130710|143|(ABE;-;@17;NGG;TCC:CCC;S:P;)	ENST00000347559	143	P	TGGAGTTCAGCAGAGCCTCCAGG
ENST00000347559|1|+|156130665|156130710|143|(ABE;-;@17;NG;TCC:CCC;S:P;)	ENST00000347559	143	P	TGGAGTTCAGCAGAGCCTCCAG
ENST00000361308|1|+|156130665|156130710|143|(ABE;-;@17;NGG;TCC:CCC;S:P;)	ENST00000361308	143	P	TGGAGTTCAGCAGAGCCTCCAGG
ENST00000361308|1|+|156130665|156130710|143|(ABE;-;@17;NG;TCC:CCC;S:P;)	ENST00000361308	143	P	TGGAGTTCAGCAGAGCCTCCAG
ENST00000368297|1|+|156130665|156130710|62|(ABE;-;@17;NGG;TCC:CCC;S:P;)	ENST00000368297	62	P	TGGAGTTCAGCAGAGCCTCCAGG
ENST00000368297|1|+|156130665|156130710|62|(ABE;-;@17;NG;TCC:CCC;S:P;)	ENST00000368297	62	P	TGGAGTTCAGCAGAGCCTCCAG
ENST00000368299|1|+|156130665|156130710|143|(ABE;-;@17;NGG;TCC:CCC;S:P;)	ENST00000368299	143	P	TGGAGTTCAGCAGAGCCTCCAGG
ENST00000368299|1|+|156130665|156130710|143|(ABE;-;@17;NG;TCC:CCC;S:P;)	ENST00000368299	143	P	TGGAGTTCAGCAGAGCCTCCAG
ENST00000368300|1|+|156130665|156130710|143|(ABE;-;@17;NGG;TCC:CCC;S:P;)	ENST00000368300	143	P	TGGAGTTCAGCAGAGCCTCCAGG
ENST00000368300|1|+|156130665|156130710|143|(ABE;-;@17;NG;TCC:CCC;S:P;)	ENST00000368300	143	P	TGGAGTTCAGCAGAGCCTCCAG
ENST00000368301|1|+|156130665|156130710|143|(ABE;-;@17;NGG;TCC:CCC;S:P;)	ENST00000368301	143	P	TGGAGTTCAGCAGAGCCTCCAGG
ENST00000368301|1|+|156130665|156130710|143|(ABE;-;@17;NG;TCC:CCC;S:P;)	ENST00000368301	143	P	TGGAGTTCAGCAGAGCCTCCAG
ENST00000448611|1|+|156130665|156130710|31|(ABE;-;@17;NGG;TCC:CCC;S:P;)	ENST00000448611	31	P	TGGAGTTCAGCAGAGCCTCCAGG
ENST00000448611|1|+|156130665|156130710|31|(ABE;-;@17;NG;TCC:CCC;S:P;)	ENST00000448611	31	P	TGGAGTTCAGCAGAGCCTCCAG
ENST00000473598|1|+|156130665|156130710|44|(ABE;-;@17;NGG;TCC:CCC;S:P;)	ENST00000473598	44	P	TGGAGTTCAGCAGAGCCTCCAGG
ENST00000473598|1|+|156130665|156130710|44|(ABE;-;@17;NG;TCC:CCC;S:P;)	ENST00000473598	44	P	TGGAGTTCAGCAGAGCCTCCAG
ENST00000347559|1|+|156130677|156130722|147|(Target-AID;-;@17;NG;GCA:ACA;A:T;)	ENST00000347559	147	T	GTGCGGCCTCCTTGGAGTTCAG
ENST00000361308|1|+|156130677|156130722|147|(Target-AID;-;@17;NG;GCA:ACA;A:T;)	ENST00000361308	147	T	GTGCGGCCTCCTTGGAGTTCAG
ENST00000368297|1|+|156130677|156130722|66|(Target-AID;-;@17;NG;GCA:ACA;A:T;)	ENST00000368297	66	T	GTGCGGCCTCCTTGGAGTTCAG
ENST00000368299|1|+|156130677|156130722|147|(Target-AID;-;@17;NG;GCA:ACA;A:T;)	ENST00000368299	147	T	GTGCGGCCTCCTTGGAGTTCAG
ENST00000368300|1|+|156130677|156130722|147|(Target-AID;-;@17;NG;GCA:ACA;A:T;)	ENST00000368300	147	T	GTGCGGCCTCCTTGGAGTTCAG
ENST00000368301|1|+|156130677|156130722|147|(Target-AID;-;@17;NG;GCA:ACA;A:T;)	ENST00000368301	147	T	GTGCGGCCTCCTTGGAGTTCAG
ENST00000448611|1|+|156130677|156130722|35|(Target-AID;-;@17;NG;GCA:ACA;A:T;)	ENST00000448611	35	T	GTGCGGCCTCCTTGGAGTTCAG
ENST00000473598|1|+|156130677|156130722|48|(Target-AID;-;@17;NG;GCA:ACA;A:T;)	ENST00000473598	48	T	GTGCGGCCTCCTTGGAGTTCAG
ENST00000347559|1|+|156130680|156130725|148|(ABE;-;@13;NGG;CTG:CCG;L:P;)	ENST00000347559	148	P	AGTGCTCAGTGCGGCCTCCTTGG
ENST00000347559|1|+|156130680|156130725|148|(ABE;-;@16;NG;CTG:CCG;L:P;)	ENST00000347559	148	P	GCTCAGTGCGGCCTCCTTGGAG
ENST00000347559|1|+|156130680|156130725|148|(ABE;-;@14;NG;CTG:CCG;L:P;)	ENST00000347559	148	P	GTGCTCAGTGCGGCCTCCTTGG
ENST00000347559|1|+|156130680|156130725|148|(ABE;-;@13;NG;CTG:CCG;L:P;)	ENST00000347559	148	P	AGTGCTCAGTGCGGCCTCCTTG
ENST00000361308|1|+|156130680|156130725|148|(ABE;-;@13;NGG;CTG:CCG;L:P;)	ENST00000361308	148	P	AGTGCTCAGTGCGGCCTCCTTGG
ENST00000361308|1|+|156130680|156130725|148|(ABE;-;@16;NG;CTG:CCG;L:P;)	ENST00000361308	148	P	GCTCAGTGCGGCCTCCTTGGAG
ENST00000361308|1|+|156130680|156130725|148|(ABE;-;@14;NG;CTG:CCG;L:P;)	ENST00000361308	148	P	GTGCTCAGTGCGGCCTCCTTGG
ENST00000361308|1|+|156130680|156130725|148|(ABE;-;@13;NG;CTG:CCG;L:P;)	ENST00000361308	148	P	AGTGCTCAGTGCGGCCTCCTTG
ENST00000368297|1|+|156130680|156130725|67|(ABE;-;@13;NGG;CTG:CCG;L:P;)	ENST00000368297	67	P	AGTGCTCAGTGCGGCCTCCTTGG
ENST00000368297|1|+|156130680|156130725|67|(ABE;-;@16;NG;CTG:CCG;L:P;)	ENST00000368297	67	P	GCTCAGTGCGGCCTCCTTGGAG
ENST00000368297|1|+|156130680|156130725|67|(ABE;-;@14;NG;CTG:CCG;L:P;)	ENST00000368297	67	P	GTGCTCAGTGCGGCCTCCTTGG
ENST00000368297|1|+|156130680|156130725|67|(ABE;-;@13;NG;CTG:CCG;L:P;)	ENST00000368297	67	P	AGTGCTCAGTGCGGCCTCCTTG
ENST00000368299|1|+|156130680|156130725|148|(ABE;-;@13;NGG;CTG:CCG;L:P;)	ENST00000368299	148	P	AGTGCTCAGTGCGGCCTCCTTGG
ENST00000368299|1|+|156130680|156130725|148|(ABE;-;@16;NG;CTG:CCG;L:P;)	ENST00000368299	148	P	GCTCAGTGCGGCCTCCTTGGAG
ENST00000368299|1|+|156130680|156130725|148|(ABE;-;@14;NG;CTG:CCG;L:P;)	ENST00000368299	148	P	GTGCTCAGTGCGGCCTCCTTGG
ENST00000368299|1|+|156130680|156130725|148|(ABE;-;@13;NG;CTG:CCG;L:P;)	ENST00000368299	148	P	AGTGCTCAGTGCGGCCTCCTTG
ENST00000368300|1|+|156130680|156130725|148|(ABE;-;@13;NGG;CTG:CCG;L:P;)	ENST00000368300	148	P	AGTGCTCAGTGCGGCCTCCTTGG
ENST00000368300|1|+|156130680|156130725|148|(ABE;-;@16;NG;CTG:CCG;L:P;)	ENST00000368300	148	P	GCTCAGTGCGGCCTCCTTGGAG
ENST00000368300|1|+|156130680|156130725|148|(ABE;-;@14;NG;CTG:CCG;L:P;)	ENST00000368300	148	P	GTGCTCAGTGCGGCCTCCTTGG
ENST00000368300|1|+|156130680|156130725|148|(ABE;-;@13;NG;CTG:CCG;L:P;)	ENST00000368300	148	P	AGTGCTCAGTGCGGCCTCCTTG
ENST00000368301|1|+|156130680|156130725|148|(ABE;-;@13;NGG;CTG:CCG;L:P;)	ENST00000368301	148	P	AGTGCTCAGTGCGGCCTCCTTGG
ENST00000368301|1|+|156130680|156130725|148|(ABE;-;@16;NG;CTG:CCG;L:P;)	ENST00000368301	148	P	GCTCAGTGCGGCCTCCTTGGAG
ENST00000368301|1|+|156130680|156130725|148|(ABE;-;@14;NG;CTG:CCG;L:P;)	ENST00000368301	148	P	GTGCTCAGTGCGGCCTCCTTGG
ENST00000368301|1|+|156130680|156130725|148|(ABE;-;@13;NG;CTG:CCG;L:P;)	ENST00000368301	148	P	AGTGCTCAGTGCGGCCTCCTTG
ENST00000448611|1|+|156130680|156130725|36|(ABE;-;@13;NGG;CTG:CCG;L:P;)	ENST00000448611	36	P	AGTGCTCAGTGCGGCCTCCTTGG
ENST00000448611|1|+|156130680|156130725|36|(ABE;-;@16;NG;CTG:CCG;L:P;)	ENST00000448611	36	P	GCTCAGTGCGGCCTCCTTGGAG
ENST00000448611|1|+|156130680|156130725|36|(ABE;-;@14;NG;CTG:CCG;L:P;)	ENST00000448611	36	P	GTGCTCAGTGCGGCCTCCTTGG
ENST00000448611|1|+|156130680|156130725|36|(ABE;-;@13;NG;CTG:CCG;L:P;)	ENST00000448611	36	P	AGTGCTCAGTGCGGCCTCCTTG
ENST00000473598|1|+|156130680|156130725|49|(ABE;-;@13;NGG;CTG:CCG;L:P;)	ENST00000473598	49	P	AGTGCTCAGTGCGGCCTCCTTGG
ENST00000473598|1|+|156130680|156130725|49|(ABE;-;@16;NG;CTG:CCG;L:P;)	ENST00000473598	49	P	GCTCAGTGCGGCCTCCTTGGAG
ENST00000473598|1|+|156130680|156130725|49|(ABE;-;@14;NG;CTG:CCG;L:P;)	ENST00000473598	49	P	GTGCTCAGTGCGGCCTCCTTGG
ENST00000473598|1|+|156130680|156130725|49|(ABE;-;@13;NG;CTG:CCG;L:P;)	ENST00000473598	49	P	AGTGCTCAGTGCGGCCTCCTTG
ENST00000347559|1|+|156130686|156130731|150|(ABE;+;@16;NG;ACT:GCT;T:A;)	ENST00000347559	150	A	GAGCACTGCTCTCAGTGAGAAG
ENST00000361308|1|+|156130686|156130731|150|(ABE;+;@16;NG;ACT:GCT;T:A;)	ENST00000361308	150	A	GAGCACTGCTCTCAGTGAGAAG
ENST00000368297|1|+|156130686|156130731|69|(ABE;+;@16;NG;ACT:GCT;T:A;)	ENST00000368297	69	A	GAGCACTGCTCTCAGTGAGAAG
ENST00000368299|1|+|156130686|156130731|150|(ABE;+;@16;NG;ACT:GCT;T:A;)	ENST00000368299	150	A	GAGCACTGCTCTCAGTGAGAAG
ENST00000368300|1|+|156130686|156130731|150|(ABE;+;@16;NG;ACT:GCT;T:A;)	ENST00000368300	150	A	GAGCACTGCTCTCAGTGAGAAG
ENST00000368301|1|+|156130686|156130731|150|(ABE;+;@16;NG;ACT:GCT;T:A;)	ENST00000368301	150	A	GAGCACTGCTCTCAGTGAGAAG
ENST00000448611|1|+|156130686|156130731|38|(ABE;+;@16;NG;ACT:GCT;T:A;)	ENST00000448611	38	A	GAGCACTGCTCTCAGTGAGAAG
ENST00000473598|1|+|156130686|156130731|51|(ABE;+;@16;NG;ACT:GCT;T:A;)	ENST00000473598	51	A	GAGCACTGCTCTCAGTGAGAAG
ENST00000347559|1|+|156130722|156130767|162|(ABE;-;@16;NG;CTG:CCG;L:P;)	ENST00000347559	162	P	ATGCAGCTCGCCCTCCAGCGTG
ENST00000347559|1|+|156130722|156130767|162|(ABE;-;@14;NG;CTG:CCG;L:P;)	ENST00000347559	162	P	TCATGCAGCTCGCCCTCCAGCG
ENST00000361308|1|+|156130722|156130767|162|(ABE;-;@16;NG;CTG:CCG;L:P;)	ENST00000361308	162	P	ATGCAGCTCGCCCTCCAGCGTG
ENST00000361308|1|+|156130722|156130767|162|(ABE;-;@14;NG;CTG:CCG;L:P;)	ENST00000361308	162	P	TCATGCAGCTCGCCCTCCAGCG
ENST00000368297|1|+|156130722|156130767|81|(ABE;-;@16;NG;CTG:CCG;L:P;)	ENST00000368297	81	P	ATGCAGCTCGCCCTCCAGCGTG
ENST00000368297|1|+|156130722|156130767|81|(ABE;-;@14;NG;CTG:CCG;L:P;)	ENST00000368297	81	P	TCATGCAGCTCGCCCTCCAGCG
ENST00000368299|1|+|156130722|156130767|162|(ABE;-;@16;NG;CTG:CCG;L:P;)	ENST00000368299	162	P	ATGCAGCTCGCCCTCCAGCGTG
ENST00000368299|1|+|156130722|156130767|162|(ABE;-;@14;NG;CTG:CCG;L:P;)	ENST00000368299	162	P	TCATGCAGCTCGCCCTCCAGCG
ENST00000368300|1|+|156130722|156130767|162|(ABE;-;@16;NG;CTG:CCG;L:P;)	ENST00000368300	162	P	ATGCAGCTCGCCCTCCAGCGTG
ENST00000368300|1|+|156130722|156130767|162|(ABE;-;@14;NG;CTG:CCG;L:P;)	ENST00000368300	162	P	TCATGCAGCTCGCCCTCCAGCG
ENST00000368301|1|+|156130722|156130767|162|(ABE;-;@16;NG;CTG:CCG;L:P;)	ENST00000368301	162	P	ATGCAGCTCGCCCTCCAGCGTG
ENST00000368301|1|+|156130722|156130767|162|(ABE;-;@14;NG;CTG:CCG;L:P;)	ENST00000368301	162	P	TCATGCAGCTCGCCCTCCAGCG
ENST00000448611|1|+|156130722|156130767|50|(ABE;-;@16;NG;CTG:CCG;L:P;)	ENST00000448611	50	P	ATGCAGCTCGCCCTCCAGCGTG
ENST00000448611|1|+|156130722|156130767|50|(ABE;-;@14;NG;CTG:CCG;L:P;)	ENST00000448611	50	P	TCATGCAGCTCGCCCTCCAGCG
ENST00000473598|1|+|156130722|156130767|63|(ABE;-;@16;NG;CTG:CCG;L:P;)	ENST00000473598	63	P	ATGCAGCTCGCCCTCCAGCGTG
ENST00000473598|1|+|156130722|156130767|63|(ABE;-;@14;NG;CTG:CCG;L:P;)	ENST00000473598	63	P	TCATGCAGCTCGCCCTCCAGCG
ENST00000347559|1|+|156134435|156134480|190|(Target-AID;+;@18;NG;CGG:TGG;R:W;)	ENST00000347559	190	W	GGCGGGTGGATGCTGAGAACAG
ENST00000347559|1|+|156134435|156134480|190|(Target-AID;+;@19;NG;CGG:TGG;R:W;)	ENST00000347559	190	W	GCGGGTGGATGCTGAGAACAGG
ENST00000347559|1|+|156134435|156134480|190|(Target-AID;+;@18;NGG;CGG:TGG;R:W;)	ENST00000347559	190	W	GGCGGGTGGATGCTGAGAACAGG
ENST00000361308|1|+|156134435|156134480|190|(Target-AID;+;@18;NG;CGG:TGG;R:W;)	ENST00000361308	190	W	GGCGGGTGGATGCTGAGAACAG
ENST00000361308|1|+|156134435|156134480|190|(Target-AID;+;@19;NG;CGG:TGG;R:W;)	ENST00000361308	190	W	GCGGGTGGATGCTGAGAACAGG
ENST00000361308|1|+|156134435|156134480|190|(Target-AID;+;@18;NGG;CGG:TGG;R:W;)	ENST00000361308	190	W	GGCGGGTGGATGCTGAGAACAGG
ENST00000368297|1|+|156134435|156134480|109|(Target-AID;+;@18;NG;CGG:TGG;R:W;)	ENST00000368297	109	W	GGCGGGTGGATGCTGAGAACAG
ENST00000368297|1|+|156134435|156134480|109|(Target-AID;+;@19;NG;CGG:TGG;R:W;)	ENST00000368297	109	W	GCGGGTGGATGCTGAGAACAGG
ENST00000368297|1|+|156134435|156134480|109|(Target-AID;+;@18;NGG;CGG:TGG;R:W;)	ENST00000368297	109	W	GGCGGGTGGATGCTGAGAACAGG
ENST00000368299|1|+|156134435|156134480|190|(Target-AID;+;@18;NG;CGG:TGG;R:W;)	ENST00000368299	190	W	GGCGGGTGGATGCTGAGAACAG
ENST00000368299|1|+|156134435|156134480|190|(Target-AID;+;@19;NG;CGG:TGG;R:W;)	ENST00000368299	190	W	GCGGGTGGATGCTGAGAACAGG
ENST00000368299|1|+|156134435|156134480|190|(Target-AID;+;@18;NGG;CGG:TGG;R:W;)	ENST00000368299	190	W	GGCGGGTGGATGCTGAGAACAGG
ENST00000368300|1|+|156134435|156134480|190|(Target-AID;+;@18;NG;CGG:TGG;R:W;)	ENST00000368300	190	W	GGCGGGTGGATGCTGAGAACAG
ENST00000368300|1|+|156134435|156134480|190|(Target-AID;+;@19;NG;CGG:TGG;R:W;)	ENST00000368300	190	W	GCGGGTGGATGCTGAGAACAGG
ENST00000368300|1|+|156134435|156134480|190|(Target-AID;+;@18;NGG;CGG:TGG;R:W;)	ENST00000368300	190	W	GGCGGGTGGATGCTGAGAACAGG
ENST00000368301|1|+|156134435|156134480|190|(Target-AID;+;@18;NG;CGG:TGG;R:W;)	ENST00000368301	190	W	GGCGGGTGGATGCTGAGAACAG
ENST00000368301|1|+|156134435|156134480|190|(Target-AID;+;@19;NG;CGG:TGG;R:W;)	ENST00000368301	190	W	GCGGGTGGATGCTGAGAACAGG
ENST00000368301|1|+|156134435|156134480|190|(Target-AID;+;@18;NGG;CGG:TGG;R:W;)	ENST00000368301	190	W	GGCGGGTGGATGCTGAGAACAGG
ENST00000448611|1|+|156134435|156134480|78|(Target-AID;+;@18;NG;CGG:TGG;R:W;)	ENST00000448611	78	W	GGCGGGTGGATGCTGAGAACAG
ENST00000448611|1|+|156134435|156134480|78|(Target-AID;+;@19;NG;CGG:TGG;R:W;)	ENST00000448611	78	W	GCGGGTGGATGCTGAGAACAGG
ENST00000448611|1|+|156134435|156134480|78|(Target-AID;+;@18;NGG;CGG:TGG;R:W;)	ENST00000448611	78	W	GGCGGGTGGATGCTGAGAACAGG
ENST00000473598|1|+|156134435|156134480|91|(Target-AID;+;@18;NG;CGG:TGG;R:W;)	ENST00000473598	91	W	GGCGGGTGGATGCTGAGAACAG
ENST00000473598|1|+|156134435|156134480|91|(Target-AID;+;@19;NG;CGG:TGG;R:W;)	ENST00000473598	91	W	GCGGGTGGATGCTGAGAACAGG
ENST00000473598|1|+|156134435|156134480|91|(Target-AID;+;@18;NGG;CGG:TGG;R:W;)	ENST00000473598	91	W	GGCGGGTGGATGCTGAGAACAGG
ENST00000347559|1|+|156134474|156134519|203|(Target-AID;-;@17;NG;GAA:AAA;E:K;)	ENST00000347559	203	K	GTTCCTCCTTCATGGTCTGCAG
ENST00000361308|1|+|156134474|156134519|203|(Target-AID;-;@17;NG;GAA:AAA;E:K;)	ENST00000361308	203	K	GTTCCTCCTTCATGGTCTGCAG
ENST00000368297|1|+|156134474|156134519|122|(Target-AID;-;@17;NG;GAA:AAA;E:K;)	ENST00000368297	122	K	GTTCCTCCTTCATGGTCTGCAG
ENST00000368299|1|+|156134474|156134519|203|(Target-AID;-;@17;NG;GAA:AAA;E:K;)	ENST00000368299	203	K	GTTCCTCCTTCATGGTCTGCAG
ENST00000368300|1|+|156134474|156134519|203|(Target-AID;-;@17;NG;GAA:AAA;E:K;)	ENST00000368300	203	K	GTTCCTCCTTCATGGTCTGCAG
ENST00000368301|1|+|156134474|156134519|203|(Target-AID;-;@17;NG;GAA:AAA;E:K;)	ENST00000368301	203	K	GTTCCTCCTTCATGGTCTGCAG
ENST00000448611|1|+|156134474|156134519|91|(Target-AID;-;@17;NG;GAA:AAA;E:K;)	ENST00000448611	91	K	GTTCCTCCTTCATGGTCTGCAG
ENST00000473598|1|+|156134474|156134519|104|(Target-AID;-;@17;NG;GAA:AAA;E:K;)	ENST00000473598	104	K	GTTCCTCCTTCATGGTCTGCAG
ENST00000347559|1|+|156134786|156134831|215|(ABE;-;@15;NGG;CTG:CCG;L:P;)	ENST00000347559	215	P	CACGCAGCTCCTGGAAGGGTTGG
ENST00000347559|1|+|156134786|156134831|215|(ABE;-;@16;NG;CTG:CCG;L:P;)	ENST00000347559	215	P	ACGCAGCTCCTGGAAGGGTTGG
ENST00000347559|1|+|156134786|156134831|215|(ABE;-;@15;NG;CTG:CCG;L:P;)	ENST00000347559	215	P	CACGCAGCTCCTGGAAGGGTTG
ENST00000361308|1|+|156134786|156134831|215|(ABE;-;@15;NGG;CTG:CCG;L:P;)	ENST00000361308	215	P	CACGCAGCTCCTGGAAGGGTTGG
ENST00000361308|1|+|156134786|156134831|215|(ABE;-;@16;NG;CTG:CCG;L:P;)	ENST00000361308	215	P	ACGCAGCTCCTGGAAGGGTTGG
ENST00000361308|1|+|156134786|156134831|215|(ABE;-;@15;NG;CTG:CCG;L:P;)	ENST00000361308	215	P	CACGCAGCTCCTGGAAGGGTTG
ENST00000368297|1|+|156134786|156134831|134|(ABE;-;@15;NGG;CTG:CCG;L:P;)	ENST00000368297	134	P	CACGCAGCTCCTGGAAGGGTTGG
ENST00000368297|1|+|156134786|156134831|134|(ABE;-;@16;NG;CTG:CCG;L:P;)	ENST00000368297	134	P	ACGCAGCTCCTGGAAGGGTTGG
ENST00000368297|1|+|156134786|156134831|134|(ABE;-;@15;NG;CTG:CCG;L:P;)	ENST00000368297	134	P	CACGCAGCTCCTGGAAGGGTTG
ENST00000368299|1|+|156134786|156134831|215|(ABE;-;@15;NGG;CTG:CCG;L:P;)	ENST00000368299	215	P	CACGCAGCTCCTGGAAGGGTTGG
ENST00000368299|1|+|156134786|156134831|215|(ABE;-;@16;NG;CTG:CCG;L:P;)	ENST00000368299	215	P	ACGCAGCTCCTGGAAGGGTTGG
ENST00000368299|1|+|156134786|156134831|215|(ABE;-;@15;NG;CTG:CCG;L:P;)	ENST00000368299	215	P	CACGCAGCTCCTGGAAGGGTTG
ENST00000368300|1|+|156134786|156134831|215|(ABE;-;@15;NGG;CTG:CCG;L:P;)	ENST00000368300	215	P	CACGCAGCTCCTGGAAGGGTTGG
ENST00000368300|1|+|156134786|156134831|215|(ABE;-;@16;NG;CTG:CCG;L:P;)	ENST00000368300	215	P	ACGCAGCTCCTGGAAGGGTTGG
ENST00000368300|1|+|156134786|156134831|215|(ABE;-;@15;NG;CTG:CCG;L:P;)	ENST00000368300	215	P	CACGCAGCTCCTGGAAGGGTTG
ENST00000368301|1|+|156134786|156134831|215|(ABE;-;@15;NGG;CTG:CCG;L:P;)	ENST00000368301	215	P	CACGCAGCTCCTGGAAGGGTTGG
ENST00000368301|1|+|156134786|156134831|215|(ABE;-;@16;NG;CTG:CCG;L:P;)	ENST00000368301	215	P	ACGCAGCTCCTGGAAGGGTTGG
ENST00000368301|1|+|156134786|156134831|215|(ABE;-;@15;NG;CTG:CCG;L:P;)	ENST00000368301	215	P	CACGCAGCTCCTGGAAGGGTTG
ENST00000448611|1|+|156134786|156134831|103|(ABE;-;@15;NGG;CTG:CCG;L:P;)	ENST00000448611	103	P	CACGCAGCTCCTGGAAGGGTTGG
ENST00000448611|1|+|156134786|156134831|103|(ABE;-;@16;NG;CTG:CCG;L:P;)	ENST00000448611	103	P	ACGCAGCTCCTGGAAGGGTTGG
ENST00000448611|1|+|156134786|156134831|103|(ABE;-;@15;NG;CTG:CCG;L:P;)	ENST00000448611	103	P	CACGCAGCTCCTGGAAGGGTTG
ENST00000473598|1|+|156134786|156134831|116|(ABE;-;@15;NGG;CTG:CCG;L:P;)	ENST00000473598	116	P	CACGCAGCTCCTGGAAGGGTTGG
ENST00000473598|1|+|156134786|156134831|116|(ABE;-;@16;NG;CTG:CCG;L:P;)	ENST00000473598	116	P	ACGCAGCTCCTGGAAGGGTTGG
ENST00000473598|1|+|156134786|156134831|116|(ABE;-;@15;NG;CTG:CCG;L:P;)	ENST00000473598	116	P	CACGCAGCTCCTGGAAGGGTTG
ENST00000347559|1|+|156134807|156134852|222|(Target-AID;+;@17;NG;CAT:TAT;H:Y;)	ENST00000347559	222	Y	CGTCATGAGACCCGACTGGTGG
ENST00000347559|1|+|156134807|156134852|222|(Target-AID;+;@19;NG;CAT:TAT;H:Y;)	ENST00000347559	222	Y	TCATGAGACCCGACTGGTGGAG
ENST00000361308|1|+|156134807|156134852|222|(Target-AID;+;@17;NG;CAT:TAT;H:Y;)	ENST00000361308	222	Y	CGTCATGAGACCCGACTGGTGG
ENST00000361308|1|+|156134807|156134852|222|(Target-AID;+;@19;NG;CAT:TAT;H:Y;)	ENST00000361308	222	Y	TCATGAGACCCGACTGGTGGAG
ENST00000368297|1|+|156134807|156134852|141|(Target-AID;+;@17;NG;CAT:TAT;H:Y;)	ENST00000368297	141	Y	CGTCATGAGACCCGACTGGTGG
ENST00000368297|1|+|156134807|156134852|141|(Target-AID;+;@19;NG;CAT:TAT;H:Y;)	ENST00000368297	141	Y	TCATGAGACCCGACTGGTGGAG
ENST00000368299|1|+|156134807|156134852|222|(Target-AID;+;@17;NG;CAT:TAT;H:Y;)	ENST00000368299	222	Y	CGTCATGAGACCCGACTGGTGG
ENST00000368299|1|+|156134807|156134852|222|(Target-AID;+;@19;NG;CAT:TAT;H:Y;)	ENST00000368299	222	Y	TCATGAGACCCGACTGGTGGAG
ENST00000368300|1|+|156134807|156134852|222|(Target-AID;+;@17;NG;CAT:TAT;H:Y;)	ENST00000368300	222	Y	CGTCATGAGACCCGACTGGTGG
ENST00000368300|1|+|156134807|156134852|222|(Target-AID;+;@19;NG;CAT:TAT;H:Y;)	ENST00000368300	222	Y	TCATGAGACCCGACTGGTGGAG
ENST00000368301|1|+|156134807|156134852|222|(Target-AID;+;@17;NG;CAT:TAT;H:Y;)	ENST00000368301	222	Y	CGTCATGAGACCCGACTGGTGG
ENST00000368301|1|+|156134807|156134852|222|(Target-AID;+;@19;NG;CAT:TAT;H:Y;)	ENST00000368301	222	Y	TCATGAGACCCGACTGGTGGAG
ENST00000448611|1|+|156134807|156134852|110|(Target-AID;+;@17;NG;CAT:TAT;H:Y;)	ENST00000448611	110	Y	CGTCATGAGACCCGACTGGTGG
ENST00000448611|1|+|156134807|156134852|110|(Target-AID;+;@19;NG;CAT:TAT;H:Y;)	ENST00000448611	110	Y	TCATGAGACCCGACTGGTGGAG
ENST00000473598|1|+|156134807|156134852|123|(Target-AID;+;@17;NG;CAT:TAT;H:Y;)	ENST00000473598	123	Y	CGTCATGAGACCCGACTGGTGG
ENST00000473598|1|+|156134807|156134852|123|(Target-AID;+;@19;NG;CAT:TAT;H:Y;)	ENST00000473598	123	Y	TCATGAGACCCGACTGGTGGAG
ENST00000347559|1|+|156134816|156134861|225|(Target-AID;-;@19;NGG;CGA:CAA;R:Q;)	ENST00000347559	225	Q	TCGGGTCTCATGACGGCGCTTGG
ENST00000347559|1|+|156134816|156134861|225|(Target-AID;-;@19;NG;CGA:CAA;R:Q;)	ENST00000347559	225	Q	TCGGGTCTCATGACGGCGCTTG
ENST00000361308|1|+|156134816|156134861|225|(Target-AID;-;@19;NGG;CGA:CAA;R:Q;)	ENST00000361308	225	Q	TCGGGTCTCATGACGGCGCTTGG
ENST00000361308|1|+|156134816|156134861|225|(Target-AID;-;@19;NG;CGA:CAA;R:Q;)	ENST00000361308	225	Q	TCGGGTCTCATGACGGCGCTTG
ENST00000368297|1|+|156134816|156134861|144|(Target-AID;-;@19;NGG;CGA:CAA;R:Q;)	ENST00000368297	144	Q	TCGGGTCTCATGACGGCGCTTGG
ENST00000368297|1|+|156134816|156134861|144|(Target-AID;-;@19;NG;CGA:CAA;R:Q;)	ENST00000368297	144	Q	TCGGGTCTCATGACGGCGCTTG
ENST00000368299|1|+|156134816|156134861|225|(Target-AID;-;@19;NGG;CGA:CAA;R:Q;)	ENST00000368299	225	Q	TCGGGTCTCATGACGGCGCTTGG
ENST00000368299|1|+|156134816|156134861|225|(Target-AID;-;@19;NG;CGA:CAA;R:Q;)	ENST00000368299	225	Q	TCGGGTCTCATGACGGCGCTTG
ENST00000368300|1|+|156134816|156134861|225|(Target-AID;-;@19;NGG;CGA:CAA;R:Q;)	ENST00000368300	225	Q	TCGGGTCTCATGACGGCGCTTGG
ENST00000368300|1|+|156134816|156134861|225|(Target-AID;-;@19;NG;CGA:CAA;R:Q;)	ENST00000368300	225	Q	TCGGGTCTCATGACGGCGCTTG
ENST00000368301|1|+|156134816|156134861|225|(Target-AID;-;@19;NGG;CGA:CAA;R:Q;)	ENST00000368301	225	Q	TCGGGTCTCATGACGGCGCTTGG
ENST00000368301|1|+|156134816|156134861|225|(Target-AID;-;@19;NG;CGA:CAA;R:Q;)	ENST00000368301	225	Q	TCGGGTCTCATGACGGCGCTTG
ENST00000448611|1|+|156134816|156134861|113|(Target-AID;-;@19;NGG;CGA:CAA;R:Q;)	ENST00000448611	113	Q	TCGGGTCTCATGACGGCGCTTGG
ENST00000448611|1|+|156134816|156134861|113|(Target-AID;-;@19;NG;CGA:CAA;R:Q;)	ENST00000448611	113	Q	TCGGGTCTCATGACGGCGCTTG
ENST00000473598|1|+|156134816|156134861|126|(Target-AID;-;@19;NGG;CGA:CAA;R:Q;)	ENST00000473598	126	Q	TCGGGTCTCATGACGGCGCTTGG
ENST00000473598|1|+|156134816|156134861|126|(Target-AID;-;@19;NG;CGA:CAA;R:Q;)	ENST00000473598	126	Q	TCGGGTCTCATGACGGCGCTTG
ENST00000347559|1|+|156134843|156134888|234|(Target-AID;+;@18;NG;CAG:TAG;Q:*;)	ENST00000347559	234	*	AGCAGCGTGAGTTTGAGAGCCG
ENST00000347559|1|+|156134843|156134888|234|(Target-AID;+;@19;NG;CAG:TAG;Q:*;)	ENST00000347559	234	*	GCAGCGTGAGTTTGAGAGCCGG
ENST00000347559|1|+|156134843|156134888|234|(Target-AID;+;@18;NGG;CAG:TAG;Q:*;)	ENST00000347559	234	*	AGCAGCGTGAGTTTGAGAGCCGG
ENST00000361308|1|+|156134843|156134888|234|(Target-AID;+;@18;NG;CAG:TAG;Q:*;)	ENST00000361308	234	*	AGCAGCGTGAGTTTGAGAGCCG
ENST00000361308|1|+|156134843|156134888|234|(Target-AID;+;@19;NG;CAG:TAG;Q:*;)	ENST00000361308	234	*	GCAGCGTGAGTTTGAGAGCCGG
ENST00000361308|1|+|156134843|156134888|234|(Target-AID;+;@18;NGG;CAG:TAG;Q:*;)	ENST00000361308	234	*	AGCAGCGTGAGTTTGAGAGCCGG
ENST00000368297|1|+|156134843|156134888|153|(Target-AID;+;@18;NG;CAG:TAG;Q:*;)	ENST00000368297	153	*	AGCAGCGTGAGTTTGAGAGCCG
ENST00000368297|1|+|156134843|156134888|153|(Target-AID;+;@19;NG;CAG:TAG;Q:*;)	ENST00000368297	153	*	GCAGCGTGAGTTTGAGAGCCGG
ENST00000368297|1|+|156134843|156134888|153|(Target-AID;+;@18;NGG;CAG:TAG;Q:*;)	ENST00000368297	153	*	AGCAGCGTGAGTTTGAGAGCCGG
ENST00000368299|1|+|156134843|156134888|234|(Target-AID;+;@18;NG;CAG:TAG;Q:*;)	ENST00000368299	234	*	AGCAGCGTGAGTTTGAGAGCCG
ENST00000368299|1|+|156134843|156134888|234|(Target-AID;+;@19;NG;CAG:TAG;Q:*;)	ENST00000368299	234	*	GCAGCGTGAGTTTGAGAGCCGG
ENST00000368299|1|+|156134843|156134888|234|(Target-AID;+;@18;NGG;CAG:TAG;Q:*;)	ENST00000368299	234	*	AGCAGCGTGAGTTTGAGAGCCGG
ENST00000368300|1|+|156134843|156134888|234|(Target-AID;+;@18;NG;CAG:TAG;Q:*;)	ENST00000368300	234	*	AGCAGCGTGAGTTTGAGAGCCG
ENST00000368300|1|+|156134843|156134888|234|(Target-AID;+;@19;NG;CAG:TAG;Q:*;)	ENST00000368300	234	*	GCAGCGTGAGTTTGAGAGCCGG
ENST00000368300|1|+|156134843|156134888|234|(Target-AID;+;@18;NGG;CAG:TAG;Q:*;)	ENST00000368300	234	*	AGCAGCGTGAGTTTGAGAGCCGG
ENST00000368301|1|+|156134843|156134888|234|(Target-AID;+;@18;NG;CAG:TAG;Q:*;)	ENST00000368301	234	*	AGCAGCGTGAGTTTGAGAGCCG
ENST00000368301|1|+|156134843|156134888|234|(Target-AID;+;@19;NG;CAG:TAG;Q:*;)	ENST00000368301	234	*	GCAGCGTGAGTTTGAGAGCCGG
ENST00000368301|1|+|156134843|156134888|234|(Target-AID;+;@18;NGG;CAG:TAG;Q:*;)	ENST00000368301	234	*	AGCAGCGTGAGTTTGAGAGCCGG
ENST00000448611|1|+|156134843|156134888|122|(Target-AID;+;@18;NG;CAG:TAG;Q:*;)	ENST00000448611	122	*	AGCAGCGTGAGTTTGAGAGCCG
ENST00000448611|1|+|156134843|156134888|122|(Target-AID;+;@19;NG;CAG:TAG;Q:*;)	ENST00000448611	122	*	GCAGCGTGAGTTTGAGAGCCGG
ENST00000448611|1|+|156134843|156134888|122|(Target-AID;+;@18;NGG;CAG:TAG;Q:*;)	ENST00000448611	122	*	AGCAGCGTGAGTTTGAGAGCCGG
ENST00000473598|1|+|156134843|156134888|135|(Target-AID;+;@18;NG;CAG:TAG;Q:*;)	ENST00000473598	135	*	AGCAGCGTGAGTTTGAGAGCCG
ENST00000473598|1|+|156134843|156134888|135|(Target-AID;+;@19;NG;CAG:TAG;Q:*;)	ENST00000473598	135	*	GCAGCGTGAGTTTGAGAGCCGG
ENST00000473598|1|+|156134843|156134888|135|(Target-AID;+;@18;NGG;CAG:TAG;Q:*;)	ENST00000473598	135	*	AGCAGCGTGAGTTTGAGAGCCGG
ENST00000347559|1|+|156134867|156134912|242|(Target-AID;+;@18;NG;GCG:GTG;A:V;)	ENST00000347559	242	V	GGCGGATGCGCTGCAGGAACTG
ENST00000361308|1|+|156134867|156134912|242|(Target-AID;+;@18;NG;GCG:GTG;A:V;)	ENST00000361308	242	V	GGCGGATGCGCTGCAGGAACTG
ENST00000368297|1|+|156134867|156134912|161|(Target-AID;+;@18;NG;GCG:GTG;A:V;)	ENST00000368297	161	V	GGCGGATGCGCTGCAGGAACTG
ENST00000368299|1|+|156134867|156134912|242|(Target-AID;+;@18;NG;GCG:GTG;A:V;)	ENST00000368299	242	V	GGCGGATGCGCTGCAGGAACTG
ENST00000368300|1|+|156134867|156134912|242|(Target-AID;+;@18;NG;GCG:GTG;A:V;)	ENST00000368300	242	V	GGCGGATGCGCTGCAGGAACTG
ENST00000368301|1|+|156134867|156134912|242|(Target-AID;+;@18;NG;GCG:GTG;A:V;)	ENST00000368301	242	V	GGCGGATGCGCTGCAGGAACTG
ENST00000448611|1|+|156134867|156134912|130|(Target-AID;+;@18;NG;GCG:GTG;A:V;)	ENST00000448611	130	V	GGCGGATGCGCTGCAGGAACTG
ENST00000473598|1|+|156134867|156134912|143|(Target-AID;+;@18;NG;GCG:GTG;A:V;)	ENST00000473598	143	V	GGCGGATGCGCTGCAGGAACTG
ENST00000347559|1|+|156134888|156134933|249|(Target-AID;+;@19;NG;CGG:TGG;R:W;)	ENST00000347559	249	W	GCGGGCCCAGCATGAGGACCAG
ENST00000347559|1|+|156134888|156134933|249|(Target-AID;+;@19;NGG;CGG:TGG;R:W;)	ENST00000347559	249	W	GCGGGCCCAGCATGAGGACCAGG
ENST00000361308|1|+|156134888|156134933|249|(Target-AID;+;@19;NG;CGG:TGG;R:W;)	ENST00000361308	249	W	GCGGGCCCAGCATGAGGACCAG
ENST00000361308|1|+|156134888|156134933|249|(Target-AID;+;@19;NGG;CGG:TGG;R:W;)	ENST00000361308	249	W	GCGGGCCCAGCATGAGGACCAGG
ENST00000368297|1|+|156134888|156134933|168|(Target-AID;+;@19;NG;CGG:TGG;R:W;)	ENST00000368297	168	W	GCGGGCCCAGCATGAGGACCAG
ENST00000368297|1|+|156134888|156134933|168|(Target-AID;+;@19;NGG;CGG:TGG;R:W;)	ENST00000368297	168	W	GCGGGCCCAGCATGAGGACCAGG
ENST00000368299|1|+|156134888|156134933|249|(Target-AID;+;@19;NG;CGG:TGG;R:W;)	ENST00000368299	249	W	GCGGGCCCAGCATGAGGACCAG
ENST00000368299|1|+|156134888|156134933|249|(Target-AID;+;@19;NGG;CGG:TGG;R:W;)	ENST00000368299	249	W	GCGGGCCCAGCATGAGGACCAGG
ENST00000368300|1|+|156134888|156134933|249|(Target-AID;+;@19;NG;CGG:TGG;R:W;)	ENST00000368300	249	W	GCGGGCCCAGCATGAGGACCAG
ENST00000368300|1|+|156134888|156134933|249|(Target-AID;+;@19;NGG;CGG:TGG;R:W;)	ENST00000368300	249	W	GCGGGCCCAGCATGAGGACCAGG
ENST00000368301|1|+|156134888|156134933|249|(Target-AID;+;@19;NG;CGG:TGG;R:W;)	ENST00000368301	249	W	GCGGGCCCAGCATGAGGACCAG
ENST00000368301|1|+|156134888|156134933|249|(Target-AID;+;@19;NGG;CGG:TGG;R:W;)	ENST00000368301	249	W	GCGGGCCCAGCATGAGGACCAGG
ENST00000448611|1|+|156134888|156134933|137|(Target-AID;+;@19;NG;CGG:TGG;R:W;)	ENST00000448611	137	W	GCGGGCCCAGCATGAGGACCAG
ENST00000448611|1|+|156134888|156134933|137|(Target-AID;+;@19;NGG;CGG:TGG;R:W;)	ENST00000448611	137	W	GCGGGCCCAGCATGAGGACCAGG
ENST00000473598|1|+|156134888|156134933|150|(Target-AID;+;@19;NG;CGG:TGG;R:W;)	ENST00000473598	150	W	GCGGGCCCAGCATGAGGACCAG
ENST00000473598|1|+|156134888|156134933|150|(Target-AID;+;@19;NGG;CGG:TGG;R:W;)	ENST00000473598	150	W	GCGGGCCCAGCATGAGGACCAGG
ENST00000347559|1|+|156134930|156134975|263|(Target-AID;+;@17;NG;CTG:TTG;L:L;)	ENST00000347559	263	L	GAGCTGGAGAAGACTTATTCTG
ENST00000361308|1|+|156134930|156134975|263|(Target-AID;+;@17;NG;CTG:TTG;L:L;)	ENST00000361308	263	L	GAGCTGGAGAAGACTTATTCTG
ENST00000368297|1|+|156134930|156134975|182|(Target-AID;+;@17;NG;CTG:TTG;L:L;)	ENST00000368297	182	L	GAGCTGGAGAAGACTTATTCTG
ENST00000368299|1|+|156134930|156134975|263|(Target-AID;+;@17;NG;CTG:TTG;L:L;)	ENST00000368299	263	L	GAGCTGGAGAAGACTTATTCTG
ENST00000368300|1|+|156134930|156134975|263|(Target-AID;+;@17;NG;CTG:TTG;L:L;)	ENST00000368300	263	L	GAGCTGGAGAAGACTTATTCTG
ENST00000368301|1|+|156134930|156134975|263|(Target-AID;+;@17;NG;CTG:TTG;L:L;)	ENST00000368301	263	L	GAGCTGGAGAAGACTTATTCTG
ENST00000448611|1|+|156134930|156134975|151|(Target-AID;+;@17;NG;CTG:TTG;L:L;)	ENST00000448611	151	L	GAGCTGGAGAAGACTTATTCTG
ENST00000473598|1|+|156134930|156134975|164|(Target-AID;+;@17;NG;CTG:TTG;L:L;)	ENST00000473598	164	L	GAGCTGGAGAAGACTTATTCTG
ENST00000347559|1|+|156135213|156135258|287|(ABE;-;@17;NG;GCT:GCC;A:A;)	ENST00000347559	287	A	GGCAGCCCCCACCAGGTTGCTG
ENST00000347559|1|+|156135213|156135258|287|(ABE;-;@14;NG;GCT:GCC;A:A;)	ENST00000347559	287	A	GTGGGCAGCCCCCACCAGGTTG
ENST00000361308|1|+|156135213|156135258|287|(ABE;-;@17;NG;GCT:GCC;A:A;)	ENST00000361308	287	A	GGCAGCCCCCACCAGGTTGCTG
ENST00000361308|1|+|156135213|156135258|287|(ABE;-;@14;NG;GCT:GCC;A:A;)	ENST00000361308	287	A	GTGGGCAGCCCCCACCAGGTTG
ENST00000368297|1|+|156135213|156135258|206|(ABE;-;@17;NG;GCT:GCC;A:A;)	ENST00000368297	206	A	GGCAGCCCCCACCAGGTTGCTG
ENST00000368297|1|+|156135213|156135258|206|(ABE;-;@14;NG;GCT:GCC;A:A;)	ENST00000368297	206	A	GTGGGCAGCCCCCACCAGGTTG
ENST00000368299|1|+|156135213|156135258|287|(ABE;-;@17;NG;GCT:GCC;A:A;)	ENST00000368299	287	A	GGCAGCCCCCACCAGGTTGCTG
ENST00000368299|1|+|156135213|156135258|287|(ABE;-;@14;NG;GCT:GCC;A:A;)	ENST00000368299	287	A	GTGGGCAGCCCCCACCAGGTTG
ENST00000368300|1|+|156135213|156135258|287|(ABE;-;@17;NG;GCT:GCC;A:A;)	ENST00000368300	287	A	GGCAGCCCCCACCAGGTTGCTG
ENST00000368300|1|+|156135213|156135258|287|(ABE;-;@14;NG;GCT:GCC;A:A;)	ENST00000368300	287	A	GTGGGCAGCCCCCACCAGGTTG
ENST00000368301|1|+|156135213|156135258|287|(ABE;-;@17;NG;GCT:GCC;A:A;)	ENST00000368301	287	A	GGCAGCCCCCACCAGGTTGCTG
ENST00000368301|1|+|156135213|156135258|287|(ABE;-;@14;NG;GCT:GCC;A:A;)	ENST00000368301	287	A	GTGGGCAGCCCCCACCAGGTTG
ENST00000448611|1|+|156135213|156135258|175|(ABE;-;@17;NG;GCT:GCC;A:A;)	ENST00000448611	175	A	GGCAGCCCCCACCAGGTTGCTG
ENST00000448611|1|+|156135213|156135258|175|(ABE;-;@14;NG;GCT:GCC;A:A;)	ENST00000448611	175	A	GTGGGCAGCCCCCACCAGGTTG
ENST00000473598|1|+|156135213|156135258|188|(ABE;-;@17;NG;GCT:GCC;A:A;)	ENST00000473598	188	A	GGCAGCCCCCACCAGGTTGCTG
ENST00000473598|1|+|156135213|156135258|188|(ABE;-;@14;NG;GCT:GCC;A:A;)	ENST00000473598	188	A	GTGGGCAGCCCCCACCAGGTTG
ENST00000347559|1|+|156135222|156135267|290|(Target-AID;-;@18;NG;GAG:AAG;E:K;)	ENST00000347559	290	K	CTCGTGGGCAGCCCCCACCAGG
ENST00000361308|1|+|156135222|156135267|290|(Target-AID;-;@18;NG;GAG:AAG;E:K;)	ENST00000361308	290	K	CTCGTGGGCAGCCCCCACCAGG
ENST00000368297|1|+|156135222|156135267|209|(Target-AID;-;@18;NG;GAG:AAG;E:K;)	ENST00000368297	209	K	CTCGTGGGCAGCCCCCACCAGG
ENST00000368299|1|+|156135222|156135267|290|(Target-AID;-;@18;NG;GAG:AAG;E:K;)	ENST00000368299	290	K	CTCGTGGGCAGCCCCCACCAGG
ENST00000368300|1|+|156135222|156135267|290|(Target-AID;-;@18;NG;GAG:AAG;E:K;)	ENST00000368300	290	K	CTCGTGGGCAGCCCCCACCAGG
ENST00000368301|1|+|156135222|156135267|290|(Target-AID;-;@18;NG;GAG:AAG;E:K;)	ENST00000368301	290	K	CTCGTGGGCAGCCCCCACCAGG
ENST00000448611|1|+|156135222|156135267|178|(Target-AID;-;@18;NG;GAG:AAG;E:K;)	ENST00000448611	178	K	CTCGTGGGCAGCCCCCACCAGG
ENST00000473598|1|+|156135222|156135267|191|(Target-AID;-;@18;NG;GAG:AAG;E:K;)	ENST00000473598	191	K	CTCGTGGGCAGCCCCCACCAGG
ENST00000347559|1|+|156135249|156135294|299|(ABE;+;@14;NG;ATC:GTC;I:V;)	ENST00000347559	299	V	ATCCGCATCGACAGCCTCTCTG
ENST00000361308|1|+|156135249|156135294|299|(ABE;+;@14;NG;ATC:GTC;I:V;)	ENST00000361308	299	V	ATCCGCATCGACAGCCTCTCTG
ENST00000368297|1|+|156135249|156135294|218|(ABE;+;@14;NG;ATC:GTC;I:V;)	ENST00000368297	218	V	ATCCGCATCGACAGCCTCTCTG
ENST00000368299|1|+|156135249|156135294|299|(ABE;+;@14;NG;ATC:GTC;I:V;)	ENST00000368299	299	V	ATCCGCATCGACAGCCTCTCTG
ENST00000368300|1|+|156135249|156135294|299|(ABE;+;@14;NG;ATC:GTC;I:V;)	ENST00000368300	299	V	ATCCGCATCGACAGCCTCTCTG
ENST00000368301|1|+|156135249|156135294|299|(ABE;+;@14;NG;ATC:GTC;I:V;)	ENST00000368301	299	V	ATCCGCATCGACAGCCTCTCTG
ENST00000448611|1|+|156135249|156135294|187|(ABE;+;@14;NG;ATC:GTC;I:V;)	ENST00000448611	187	V	ATCCGCATCGACAGCCTCTCTG
ENST00000473598|1|+|156135249|156135294|200|(ABE;+;@14;NG;ATC:GTC;I:V;)	ENST00000473598	200	V	ATCCGCATCGACAGCCTCTCTG
ENST00000347559|1|+|156135252|156135297|300|(Target-AID;-;@17;NG;GAC:AAC;D:N;)	ENST00000347559	300	N	TGTCGATGCGGATGCGCGACTG
ENST00000361308|1|+|156135252|156135297|300|(Target-AID;-;@17;NG;GAC:AAC;D:N;)	ENST00000361308	300	N	TGTCGATGCGGATGCGCGACTG
ENST00000368297|1|+|156135252|156135297|219|(Target-AID;-;@17;NG;GAC:AAC;D:N;)	ENST00000368297	219	N	TGTCGATGCGGATGCGCGACTG
ENST00000368299|1|+|156135252|156135297|300|(Target-AID;-;@17;NG;GAC:AAC;D:N;)	ENST00000368299	300	N	TGTCGATGCGGATGCGCGACTG
ENST00000368300|1|+|156135252|156135297|300|(Target-AID;-;@17;NG;GAC:AAC;D:N;)	ENST00000368300	300	N	TGTCGATGCGGATGCGCGACTG
ENST00000368301|1|+|156135252|156135297|300|(Target-AID;-;@17;NG;GAC:AAC;D:N;)	ENST00000368301	300	N	TGTCGATGCGGATGCGCGACTG
ENST00000448611|1|+|156135252|156135297|188|(Target-AID;-;@17;NG;GAC:AAC;D:N;)	ENST00000448611	188	N	TGTCGATGCGGATGCGCGACTG
ENST00000473598|1|+|156135252|156135297|201|(Target-AID;-;@17;NG;GAC:AAC;D:N;)	ENST00000473598	201	N	TGTCGATGCGGATGCGCGACTG
ENST00000347559|1|+|156135270|156135315|306|(ABE;-;@16;NG;CTC:CCC;L:P;)	ENST00000347559	306	P	GCTGAGCTGGGCAGAGAGGCTG
ENST00000347559|1|+|156135270|156135315|306|(ABE;-;@13;NG;CTC:CCC;L:P;)	ENST00000347559	306	P	CTGGCTGAGCTGGGCAGAGAGG
ENST00000361308|1|+|156135270|156135315|306|(ABE;-;@16;NG;CTC:CCC;L:P;)	ENST00000361308	306	P	GCTGAGCTGGGCAGAGAGGCTG
ENST00000361308|1|+|156135270|156135315|306|(ABE;-;@13;NG;CTC:CCC;L:P;)	ENST00000361308	306	P	CTGGCTGAGCTGGGCAGAGAGG
ENST00000368297|1|+|156135270|156135315|225|(ABE;-;@16;NG;CTC:CCC;L:P;)	ENST00000368297	225	P	GCTGAGCTGGGCAGAGAGGCTG
ENST00000368297|1|+|156135270|156135315|225|(ABE;-;@13;NG;CTC:CCC;L:P;)	ENST00000368297	225	P	CTGGCTGAGCTGGGCAGAGAGG
ENST00000368299|1|+|156135270|156135315|306|(ABE;-;@16;NG;CTC:CCC;L:P;)	ENST00000368299	306	P	GCTGAGCTGGGCAGAGAGGCTG
ENST00000368299|1|+|156135270|156135315|306|(ABE;-;@13;NG;CTC:CCC;L:P;)	ENST00000368299	306	P	CTGGCTGAGCTGGGCAGAGAGG
ENST00000368300|1|+|156135270|156135315|306|(ABE;-;@16;NG;CTC:CCC;L:P;)	ENST00000368300	306	P	GCTGAGCTGGGCAGAGAGGCTG
ENST00000368300|1|+|156135270|156135315|306|(ABE;-;@13;NG;CTC:CCC;L:P;)	ENST00000368300	306	P	CTGGCTGAGCTGGGCAGAGAGG
ENST00000368301|1|+|156135270|156135315|306|(ABE;-;@16;NG;CTC:CCC;L:P;)	ENST00000368301	306	P	GCTGAGCTGGGCAGAGAGGCTG
ENST00000368301|1|+|156135270|156135315|306|(ABE;-;@13;NG;CTC:CCC;L:P;)	ENST00000368301	306	P	CTGGCTGAGCTGGGCAGAGAGG
ENST00000448611|1|+|156135270|156135315|194|(ABE;-;@16;NG;CTC:CCC;L:P;)	ENST00000448611	194	P	GCTGAGCTGGGCAGAGAGGCTG
ENST00000448611|1|+|156135270|156135315|194|(ABE;-;@13;NG;CTC:CCC;L:P;)	ENST00000448611	194	P	CTGGCTGAGCTGGGCAGAGAGG
ENST00000473598|1|+|156135270|156135315|207|(ABE;-;@16;NG;CTC:CCC;L:P;)	ENST00000473598	207	P	GCTGAGCTGGGCAGAGAGGCTG
ENST00000473598|1|+|156135270|156135315|207|(ABE;-;@13;NG;CTC:CCC;L:P;)	ENST00000473598	207	P	CTGGCTGAGCTGGGCAGAGAGG
ENST00000347559|1|+|156135903|156135948|321|(Target-AID;+;@19;NG;CGA:TGA;R:*;)	ENST00000347559	321	*	TCGAGACCTGGAGGACTCACTG
ENST00000347559|1|+|156135903|156135948|321|(Target-AID;+;@19;NGG;CGA:TGA;R:*;)	ENST00000347559	321	*	TCGAGACCTGGAGGACTCACTGG
ENST00000361308|1|+|156135903|156135948|321|(Target-AID;+;@19;NG;CGA:TGA;R:*;)	ENST00000361308	321	*	TCGAGACCTGGAGGACTCACTG
ENST00000361308|1|+|156135903|156135948|321|(Target-AID;+;@19;NGG;CGA:TGA;R:*;)	ENST00000361308	321	*	TCGAGACCTGGAGGACTCACTGG
ENST00000368297|1|+|156135903|156135948|240|(Target-AID;+;@19;NG;CGA:TGA;R:*;)	ENST00000368297	240	*	TCGAGACCTGGAGGACTCACTG
ENST00000368297|1|+|156135903|156135948|240|(Target-AID;+;@19;NGG;CGA:TGA;R:*;)	ENST00000368297	240	*	TCGAGACCTGGAGGACTCACTGG
ENST00000368299|1|+|156135903|156135948|321|(Target-AID;+;@19;NG;CGA:TGA;R:*;)	ENST00000368299	321	*	TCGAGACCTGGAGGACTCACTG
ENST00000368299|1|+|156135903|156135948|321|(Target-AID;+;@19;NGG;CGA:TGA;R:*;)	ENST00000368299	321	*	TCGAGACCTGGAGGACTCACTGG
ENST00000368300|1|+|156135903|156135948|321|(Target-AID;+;@19;NG;CGA:TGA;R:*;)	ENST00000368300	321	*	TCGAGACCTGGAGGACTCACTG
ENST00000368300|1|+|156135903|156135948|321|(Target-AID;+;@19;NGG;CGA:TGA;R:*;)	ENST00000368300	321	*	TCGAGACCTGGAGGACTCACTGG
ENST00000368301|1|+|156135903|156135948|321|(Target-AID;+;@19;NG;CGA:TGA;R:*;)	ENST00000368301	321	*	TCGAGACCTGGAGGACTCACTG
ENST00000368301|1|+|156135903|156135948|321|(Target-AID;+;@19;NGG;CGA:TGA;R:*;)	ENST00000368301	321	*	TCGAGACCTGGAGGACTCACTGG
ENST00000448611|1|+|156135903|156135948|209|(Target-AID;+;@19;NG;CGA:TGA;R:*;)	ENST00000448611	209	*	TCGAGACCTGGAGGACTCACTG
ENST00000448611|1|+|156135903|156135948|209|(Target-AID;+;@19;NGG;CGA:TGA;R:*;)	ENST00000448611	209	*	TCGAGACCTGGAGGACTCACTGG
ENST00000473598|1|+|156135903|156135948|222|(Target-AID;+;@19;NG;CGA:TGA;R:*;)	ENST00000473598	222	*	TCGAGACCTGGAGGACTCACTG
ENST00000473598|1|+|156135903|156135948|222|(Target-AID;+;@19;NGG;CGA:TGA;R:*;)	ENST00000473598	222	*	TCGAGACCTGGAGGACTCACTGG
ENST00000347559|1|+|156135945|156135990|335|(Target-AID;+;@19;NG;CGG:TGG;R:W;)	ENST00000347559	335	W	CCGGCGGCTGCTGGCGGAAAAG
ENST00000347559|1|+|156135945|156135990|335|(Target-AID;+;@19;NGG;CGG:TGG;R:W;)	ENST00000347559	335	W	CCGGCGGCTGCTGGCGGAAAAGG
ENST00000361308|1|+|156135945|156135990|335|(Target-AID;+;@19;NG;CGG:TGG;R:W;)	ENST00000361308	335	W	CCGGCGGCTGCTGGCGGAAAAG
ENST00000361308|1|+|156135945|156135990|335|(Target-AID;+;@19;NGG;CGG:TGG;R:W;)	ENST00000361308	335	W	CCGGCGGCTGCTGGCGGAAAAGG
ENST00000368297|1|+|156135945|156135990|254|(Target-AID;+;@19;NG;CGG:TGG;R:W;)	ENST00000368297	254	W	CCGGCGGCTGCTGGCGGAAAAG
ENST00000368297|1|+|156135945|156135990|254|(Target-AID;+;@19;NGG;CGG:TGG;R:W;)	ENST00000368297	254	W	CCGGCGGCTGCTGGCGGAAAAGG
ENST00000368299|1|+|156135945|156135990|335|(Target-AID;+;@19;NG;CGG:TGG;R:W;)	ENST00000368299	335	W	CCGGCGGCTGCTGGCGGAAAAG
ENST00000368299|1|+|156135945|156135990|335|(Target-AID;+;@19;NGG;CGG:TGG;R:W;)	ENST00000368299	335	W	CCGGCGGCTGCTGGCGGAAAAGG
ENST00000368300|1|+|156135945|156135990|335|(Target-AID;+;@19;NG;CGG:TGG;R:W;)	ENST00000368300	335	W	CCGGCGGCTGCTGGCGGAAAAG
ENST00000368300|1|+|156135945|156135990|335|(Target-AID;+;@19;NGG;CGG:TGG;R:W;)	ENST00000368300	335	W	CCGGCGGCTGCTGGCGGAAAAGG
ENST00000368301|1|+|156135945|156135990|335|(Target-AID;+;@19;NG;CGG:TGG;R:W;)	ENST00000368301	335	W	CCGGCGGCTGCTGGCGGAAAAG
ENST00000368301|1|+|156135945|156135990|335|(Target-AID;+;@19;NGG;CGG:TGG;R:W;)	ENST00000368301	335	W	CCGGCGGCTGCTGGCGGAAAAGG
ENST00000448611|1|+|156135945|156135990|223|(Target-AID;+;@19;NG;CGG:TGG;R:W;)	ENST00000448611	223	W	CCGGCGGCTGCTGGCGGAAAAG
ENST00000448611|1|+|156135945|156135990|223|(Target-AID;+;@19;NGG;CGG:TGG;R:W;)	ENST00000448611	223	W	CCGGCGGCTGCTGGCGGAAAAGG
ENST00000473598|1|+|156135945|156135990|236|(Target-AID;+;@19;NG;CGG:TGG;R:W;)	ENST00000473598	236	W	CCGGCGGCTGCTGGCGGAAAAG
ENST00000473598|1|+|156135945|156135990|236|(Target-AID;+;@19;NGG;CGG:TGG;R:W;)	ENST00000473598	236	W	CCGGCGGCTGCTGGCGGAAAAGG
ENST00000347559|1|+|156135987|156136032|349|(Target-AID;+;@19;NG;CGG:TGG;R:W;)	ENST00000347559	349	W	GCGGGCAAGGATGCAGCAGCAG
ENST00000361308|1|+|156135987|156136032|349|(Target-AID;+;@19;NG;CGG:TGG;R:W;)	ENST00000361308	349	W	GCGGGCAAGGATGCAGCAGCAG
ENST00000368297|1|+|156135987|156136032|268|(Target-AID;+;@19;NG;CGG:TGG;R:W;)	ENST00000368297	268	W	GCGGGCAAGGATGCAGCAGCAG
ENST00000368299|1|+|156135987|156136032|349|(Target-AID;+;@19;NG;CGG:TGG;R:W;)	ENST00000368299	349	W	GCGGGCAAGGATGCAGCAGCAG
ENST00000368300|1|+|156135987|156136032|349|(Target-AID;+;@19;NG;CGG:TGG;R:W;)	ENST00000368300	349	W	GCGGGCAAGGATGCAGCAGCAG
ENST00000368301|1|+|156135987|156136032|349|(Target-AID;+;@19;NG;CGG:TGG;R:W;)	ENST00000368301	349	W	GCGGGCAAGGATGCAGCAGCAG
ENST00000448611|1|+|156135987|156136032|237|(Target-AID;+;@19;NG;CGG:TGG;R:W;)	ENST00000448611	237	W	GCGGGCAAGGATGCAGCAGCAG
ENST00000473598|1|+|156135987|156136032|250|(Target-AID;+;@19;NG;CGG:TGG;R:W;)	ENST00000473598	250	W	GCGGGCAAGGATGCAGCAGCAG
ENST00000347559|1|+|156136005|156136050|355|(Target-AID;+;@17;NG;CAG:TAG;Q:*;)	ENST00000347559	355	*	CAGCAGCTGGACGAGTACCAGG
ENST00000347559|1|+|156136005|156136050|355|(Target-AID;+;@19;NG;CAG:TAG;Q:*;)	ENST00000347559	355	*	GCAGCTGGACGAGTACCAGGAG
ENST00000361308|1|+|156136005|156136050|355|(Target-AID;+;@17;NG;CAG:TAG;Q:*;)	ENST00000361308	355	*	CAGCAGCTGGACGAGTACCAGG
ENST00000361308|1|+|156136005|156136050|355|(Target-AID;+;@19;NG;CAG:TAG;Q:*;)	ENST00000361308	355	*	GCAGCTGGACGAGTACCAGGAG
ENST00000368297|1|+|156136005|156136050|274|(Target-AID;+;@17;NG;CAG:TAG;Q:*;)	ENST00000368297	274	*	CAGCAGCTGGACGAGTACCAGG
ENST00000368297|1|+|156136005|156136050|274|(Target-AID;+;@19;NG;CAG:TAG;Q:*;)	ENST00000368297	274	*	GCAGCTGGACGAGTACCAGGAG
ENST00000368299|1|+|156136005|156136050|355|(Target-AID;+;@17;NG;CAG:TAG;Q:*;)	ENST00000368299	355	*	CAGCAGCTGGACGAGTACCAGG
ENST00000368299|1|+|156136005|156136050|355|(Target-AID;+;@19;NG;CAG:TAG;Q:*;)	ENST00000368299	355	*	GCAGCTGGACGAGTACCAGGAG
ENST00000368300|1|+|156136005|156136050|355|(Target-AID;+;@17;NG;CAG:TAG;Q:*;)	ENST00000368300	355	*	CAGCAGCTGGACGAGTACCAGG
ENST00000368300|1|+|156136005|156136050|355|(Target-AID;+;@19;NG;CAG:TAG;Q:*;)	ENST00000368300	355	*	GCAGCTGGACGAGTACCAGGAG
ENST00000368301|1|+|156136005|156136050|355|(Target-AID;+;@17;NG;CAG:TAG;Q:*;)	ENST00000368301	355	*	CAGCAGCTGGACGAGTACCAGG
ENST00000368301|1|+|156136005|156136050|355|(Target-AID;+;@19;NG;CAG:TAG;Q:*;)	ENST00000368301	355	*	GCAGCTGGACGAGTACCAGGAG
ENST00000448611|1|+|156136005|156136050|243|(Target-AID;+;@17;NG;CAG:TAG;Q:*;)	ENST00000448611	243	*	CAGCAGCTGGACGAGTACCAGG
ENST00000448611|1|+|156136005|156136050|243|(Target-AID;+;@19;NG;CAG:TAG;Q:*;)	ENST00000448611	243	*	GCAGCTGGACGAGTACCAGGAG
ENST00000473598|1|+|156136005|156136050|256|(Target-AID;+;@17;NG;CAG:TAG;Q:*;)	ENST00000473598	256	*	CAGCAGCTGGACGAGTACCAGG
ENST00000473598|1|+|156136005|156136050|256|(Target-AID;+;@19;NG;CAG:TAG;Q:*;)	ENST00000473598	256	*	GCAGCTGGACGAGTACCAGGAG
ENST00000347559|1|+|156136047|156136092|369|(ABE;-;@13;NG;CTG:CCG;L:P;)	ENST00000347559	369	P	CATGTCCAGGGCCAGCTTGATG
ENST00000361308|1|+|156136047|156136092|369|(ABE;-;@13;NG;CTG:CCG;L:P;)	ENST00000361308	369	P	CATGTCCAGGGCCAGCTTGATG
ENST00000368297|1|+|156136047|156136092|288|(ABE;-;@13;NG;CTG:CCG;L:P;)	ENST00000368297	288	P	CATGTCCAGGGCCAGCTTGATG
ENST00000368299|1|+|156136047|156136092|369|(ABE;-;@13;NG;CTG:CCG;L:P;)	ENST00000368299	369	P	CATGTCCAGGGCCAGCTTGATG
ENST00000368300|1|+|156136047|156136092|369|(ABE;-;@13;NG;CTG:CCG;L:P;)	ENST00000368300	369	P	CATGTCCAGGGCCAGCTTGATG
ENST00000368301|1|+|156136047|156136092|369|(ABE;-;@13;NG;CTG:CCG;L:P;)	ENST00000368301	369	P	CATGTCCAGGGCCAGCTTGATG
ENST00000448611|1|+|156136047|156136092|257|(ABE;-;@13;NG;CTG:CCG;L:P;)	ENST00000448611	257	P	CATGTCCAGGGCCAGCTTGATG
ENST00000473598|1|+|156136047|156136092|270|(ABE;-;@13;NG;CTG:CCG;L:P;)	ENST00000473598	270	P	CATGTCCAGGGCCAGCTTGATG
ENST00000347559|1|+|156136062|156136107|374|(Target-AID;+;@18;NG;CAC:CAT;H:H;)	ENST00000347559	374	H	CACGCCTACCGCAAGCTCTTGG
ENST00000361308|1|+|156136062|156136107|374|(Target-AID;+;@18;NG;CAC:CAT;H:H;)	ENST00000361308	374	H	CACGCCTACCGCAAGCTCTTGG
ENST00000368297|1|+|156136062|156136107|293|(Target-AID;+;@18;NG;CAC:CAT;H:H;)	ENST00000368297	293	H	CACGCCTACCGCAAGCTCTTGG
ENST00000368299|1|+|156136062|156136107|374|(Target-AID;+;@18;NG;CAC:CAT;H:H;)	ENST00000368299	374	H	CACGCCTACCGCAAGCTCTTGG
ENST00000368300|1|+|156136062|156136107|374|(Target-AID;+;@18;NG;CAC:CAT;H:H;)	ENST00000368300	374	H	CACGCCTACCGCAAGCTCTTGG
ENST00000368301|1|+|156136062|156136107|374|(Target-AID;+;@18;NG;CAC:CAT;H:H;)	ENST00000368301	374	H	CACGCCTACCGCAAGCTCTTGG
ENST00000448611|1|+|156136062|156136107|262|(Target-AID;+;@18;NG;CAC:CAT;H:H;)	ENST00000448611	262	H	CACGCCTACCGCAAGCTCTTGG
ENST00000473598|1|+|156136062|156136107|275|(Target-AID;+;@18;NG;CAC:CAT;H:H;)	ENST00000473598	275	H	CACGCCTACCGCAAGCTCTTGG
ENST00000347559|1|+|156136071|156136116|377|(Target-AID;-;@19;NG;CGC:CAC;R:H;)	ENST00000347559	377	H	GCGGTAGGCGTGGATCTCCATG
ENST00000361308|1|+|156136071|156136116|377|(Target-AID;-;@19;NG;CGC:CAC;R:H;)	ENST00000361308	377	H	GCGGTAGGCGTGGATCTCCATG
ENST00000368297|1|+|156136071|156136116|296|(Target-AID;-;@19;NG;CGC:CAC;R:H;)	ENST00000368297	296	H	GCGGTAGGCGTGGATCTCCATG
ENST00000368299|1|+|156136071|156136116|377|(Target-AID;-;@19;NG;CGC:CAC;R:H;)	ENST00000368299	377	H	GCGGTAGGCGTGGATCTCCATG
ENST00000368300|1|+|156136071|156136116|377|(Target-AID;-;@19;NG;CGC:CAC;R:H;)	ENST00000368300	377	H	GCGGTAGGCGTGGATCTCCATG
ENST00000368301|1|+|156136071|156136116|377|(Target-AID;-;@19;NG;CGC:CAC;R:H;)	ENST00000368301	377	H	GCGGTAGGCGTGGATCTCCATG
ENST00000448611|1|+|156136071|156136116|265|(Target-AID;-;@19;NG;CGC:CAC;R:H;)	ENST00000448611	265	H	GCGGTAGGCGTGGATCTCCATG
ENST00000473598|1|+|156136071|156136116|278|(Target-AID;-;@19;NG;CGC:CAC;R:H;)	ENST00000473598	278	H	GCGGTAGGCGTGGATCTCCATG
ENST00000347559|1|+|156136080|156136125|380|(ABE;-;@13;NGG;TTG:TCG;L:S;)	ENST00000347559	380	S	GCCCTCCAAGAGCTTGCGGTAGG
ENST00000347559|1|+|156136080|156136125|380|(ABE;-;@13;NG;TTG:TCG;L:S;)	ENST00000347559	380	S	GCCCTCCAAGAGCTTGCGGTAG
ENST00000361308|1|+|156136080|156136125|380|(ABE;-;@13;NGG;TTG:TCG;L:S;)	ENST00000361308	380	S	GCCCTCCAAGAGCTTGCGGTAGG
ENST00000361308|1|+|156136080|156136125|380|(ABE;-;@13;NG;TTG:TCG;L:S;)	ENST00000361308	380	S	GCCCTCCAAGAGCTTGCGGTAG
ENST00000368297|1|+|156136080|156136125|299|(ABE;-;@13;NGG;TTG:TCG;L:S;)	ENST00000368297	299	S	GCCCTCCAAGAGCTTGCGGTAGG
ENST00000368297|1|+|156136080|156136125|299|(ABE;-;@13;NG;TTG:TCG;L:S;)	ENST00000368297	299	S	GCCCTCCAAGAGCTTGCGGTAG
ENST00000368299|1|+|156136080|156136125|380|(ABE;-;@13;NGG;TTG:TCG;L:S;)	ENST00000368299	380	S	GCCCTCCAAGAGCTTGCGGTAGG
ENST00000368299|1|+|156136080|156136125|380|(ABE;-;@13;NG;TTG:TCG;L:S;)	ENST00000368299	380	S	GCCCTCCAAGAGCTTGCGGTAG
ENST00000368300|1|+|156136080|156136125|380|(ABE;-;@13;NGG;TTG:TCG;L:S;)	ENST00000368300	380	S	GCCCTCCAAGAGCTTGCGGTAGG
ENST00000368300|1|+|156136080|156136125|380|(ABE;-;@13;NG;TTG:TCG;L:S;)	ENST00000368300	380	S	GCCCTCCAAGAGCTTGCGGTAG
ENST00000368301|1|+|156136080|156136125|380|(ABE;-;@13;NGG;TTG:TCG;L:S;)	ENST00000368301	380	S	GCCCTCCAAGAGCTTGCGGTAGG
ENST00000368301|1|+|156136080|156136125|380|(ABE;-;@13;NG;TTG:TCG;L:S;)	ENST00000368301	380	S	GCCCTCCAAGAGCTTGCGGTAG
ENST00000448611|1|+|156136080|156136125|268|(ABE;-;@13;NGG;TTG:TCG;L:S;)	ENST00000448611	268	S	GCCCTCCAAGAGCTTGCGGTAGG
ENST00000448611|1|+|156136080|156136125|268|(ABE;-;@13;NG;TTG:TCG;L:S;)	ENST00000448611	268	S	GCCCTCCAAGAGCTTGCGGTAG
ENST00000473598|1|+|156136080|156136125|281|(ABE;-;@13;NGG;TTG:TCG;L:S;)	ENST00000473598	281	S	GCCCTCCAAGAGCTTGCGGTAGG
ENST00000473598|1|+|156136080|156136125|281|(ABE;-;@13;NG;TTG:TCG;L:S;)	ENST00000473598	281	S	GCCCTCCAAGAGCTTGCGGTAG
ENST00000347559|1|+|156136086|156136131|382|(Target-AID;+;@18;NG;GGC:GGT;G:G;)	ENST00000347559	382	G	GGCGAGGAGGAGAGGTGGGCTG
ENST00000347559|1|+|156136086|156136131|382|(Target-AID;+;@19;NG;GGC:GGT;G:G;)	ENST00000347559	382	G	GCGAGGAGGAGAGGTGGGCTGG
ENST00000347559|1|+|156136086|156136131|382|(Target-AID;+;@18;NGG;GGC:GGT;G:G;)	ENST00000347559	382	G	GGCGAGGAGGAGAGGTGGGCTGG
ENST00000347559|1|+|156136086|156136131|382|(Target-AID;+;@19;NGG;GGC:GGT;G:G;)	ENST00000347559	382	G	GCGAGGAGGAGAGGTGGGCTGGG
ENST00000361308|1|+|156136086|156136131|382|(Target-AID;+;@18;NG;GGC:GGT;G:G;)	ENST00000361308	382	G	GGCGAGGAGGAGAGGTGGGCTG
ENST00000361308|1|+|156136086|156136131|382|(Target-AID;+;@19;NG;GGC:GGT;G:G;)	ENST00000361308	382	G	GCGAGGAGGAGAGGTGGGCTGG
ENST00000361308|1|+|156136086|156136131|382|(Target-AID;+;@18;NGG;GGC:GGT;G:G;)	ENST00000361308	382	G	GGCGAGGAGGAGAGGTGGGCTGG
ENST00000361308|1|+|156136086|156136131|382|(Target-AID;+;@19;NGG;GGC:GGT;G:G;)	ENST00000361308	382	G	GCGAGGAGGAGAGGTGGGCTGGG
ENST00000368297|1|+|156136086|156136131|301|(Target-AID;+;@18;NG;GGC:GGT;G:G;)	ENST00000368297	301	G	GGCGAGGAGGAGAGGTGGGCTG
ENST00000368297|1|+|156136086|156136131|301|(Target-AID;+;@19;NG;GGC:GGT;G:G;)	ENST00000368297	301	G	GCGAGGAGGAGAGGTGGGCTGG
ENST00000368297|1|+|156136086|156136131|301|(Target-AID;+;@18;NGG;GGC:GGT;G:G;)	ENST00000368297	301	G	GGCGAGGAGGAGAGGTGGGCTGG
ENST00000368297|1|+|156136086|156136131|301|(Target-AID;+;@19;NGG;GGC:GGT;G:G;)	ENST00000368297	301	G	GCGAGGAGGAGAGGTGGGCTGGG
ENST00000368299|1|+|156136086|156136131|382|(Target-AID;+;@18;NG;GGC:GGT;G:G;)	ENST00000368299	382	G	GGCGAGGAGGAGAGGTGGGCTG
ENST00000368299|1|+|156136086|156136131|382|(Target-AID;+;@19;NG;GGC:GGT;G:G;)	ENST00000368299	382	G	GCGAGGAGGAGAGGTGGGCTGG
ENST00000368299|1|+|156136086|156136131|382|(Target-AID;+;@18;NGG;GGC:GGT;G:G;)	ENST00000368299	382	G	GGCGAGGAGGAGAGGTGGGCTGG
ENST00000368299|1|+|156136086|156136131|382|(Target-AID;+;@19;NGG;GGC:GGT;G:G;)	ENST00000368299	382	G	GCGAGGAGGAGAGGTGGGCTGGG
ENST00000368300|1|+|156136086|156136131|382|(Target-AID;+;@18;NG;GGC:GGT;G:G;)	ENST00000368300	382	G	GGCGAGGAGGAGAGGTGGGCTG
ENST00000368300|1|+|156136086|156136131|382|(Target-AID;+;@19;NG;GGC:GGT;G:G;)	ENST00000368300	382	G	GCGAGGAGGAGAGGTGGGCTGG
ENST00000368300|1|+|156136086|156136131|382|(Target-AID;+;@18;NGG;GGC:GGT;G:G;)	ENST00000368300	382	G	GGCGAGGAGGAGAGGTGGGCTGG
ENST00000368300|1|+|156136086|156136131|382|(Target-AID;+;@19;NGG;GGC:GGT;G:G;)	ENST00000368300	382	G	GCGAGGAGGAGAGGTGGGCTGGG
ENST00000368301|1|+|156136086|156136131|382|(Target-AID;+;@18;NG;GGC:GGT;G:G;)	ENST00000368301	382	G	GGCGAGGAGGAGAGGTGGGCTG
ENST00000368301|1|+|156136086|156136131|382|(Target-AID;+;@19;NG;GGC:GGT;G:G;)	ENST00000368301	382	G	GCGAGGAGGAGAGGTGGGCTGG
ENST00000368301|1|+|156136086|156136131|382|(Target-AID;+;@18;NGG;GGC:GGT;G:G;)	ENST00000368301	382	G	GGCGAGGAGGAGAGGTGGGCTGG
ENST00000368301|1|+|156136086|156136131|382|(Target-AID;+;@19;NGG;GGC:GGT;G:G;)	ENST00000368301	382	G	GCGAGGAGGAGAGGTGGGCTGGG
ENST00000448611|1|+|156136086|156136131|270|(Target-AID;+;@18;NG;GGC:GGT;G:G;)	ENST00000448611	270	G	GGCGAGGAGGAGAGGTGGGCTG
ENST00000448611|1|+|156136086|156136131|270|(Target-AID;+;@19;NG;GGC:GGT;G:G;)	ENST00000448611	270	G	GCGAGGAGGAGAGGTGGGCTGG
ENST00000448611|1|+|156136086|156136131|270|(Target-AID;+;@18;NGG;GGC:GGT;G:G;)	ENST00000448611	270	G	GGCGAGGAGGAGAGGTGGGCTGG
ENST00000448611|1|+|156136086|156136131|270|(Target-AID;+;@19;NGG;GGC:GGT;G:G;)	ENST00000448611	270	G	GCGAGGAGGAGAGGTGGGCTGGG
ENST00000473598|1|+|156136086|156136131|283|(Target-AID;+;@18;NG;GGC:GGT;G:G;)	ENST00000473598	283	G	GGCGAGGAGGAGAGGTGGGCTG
ENST00000473598|1|+|156136086|156136131|283|(Target-AID;+;@19;NG;GGC:GGT;G:G;)	ENST00000473598	283	G	GCGAGGAGGAGAGGTGGGCTGG
ENST00000473598|1|+|156136086|156136131|283|(Target-AID;+;@18;NGG;GGC:GGT;G:G;)	ENST00000473598	283	G	GGCGAGGAGGAGAGGTGGGCTGG
ENST00000473598|1|+|156136086|156136131|283|(Target-AID;+;@19;NGG;GGC:GGT;G:G;)	ENST00000473598	283	G	GCGAGGAGGAGAGGTGGGCTGGG
ENST00000347559|1|+|156136196|156136241|388|(Target-AID;-;@18;NG;CGC:CAC;R:H;)	ENST00000347559	388	H	GGCGTAGCCTGGGGAGAGGGAG
ENST00000361308|1|+|156136196|156136241|388|(Target-AID;-;@18;NG;CGC:CAC;R:H;)	ENST00000361308	388	H	GGCGTAGCCTGGGGAGAGGGAG
ENST00000368297|1|+|156136196|156136241|307|(Target-AID;-;@18;NG;CGC:CAC;R:H;)	ENST00000368297	307	H	GGCGTAGCCTGGGGAGAGGGAG
ENST00000368299|1|+|156136196|156136241|388|(Target-AID;-;@18;NG;CGC:CAC;R:H;)	ENST00000368299	388	H	GGCGTAGCCTGGGGAGAGGGAG
ENST00000368300|1|+|156136196|156136241|388|(Target-AID;-;@18;NG;CGC:CAC;R:H;)	ENST00000368300	388	H	GGCGTAGCCTGGGGAGAGGGAG
ENST00000368301|1|+|156136196|156136241|388|(Target-AID;-;@18;NG;CGC:CAC;R:H;)	ENST00000368301	388	H	GGCGTAGCCTGGGGAGAGGGAG
ENST00000448611|1|+|156136196|156136241|276|(Target-AID;-;@18;NG;CGC:CAC;R:H;)	ENST00000448611	276	H	GGCGTAGCCTGGGGAGAGGGAG
ENST00000473598|1|+|156136196|156136241|289|(Target-AID;-;@18;NG;CGC:CAC;R:H;)	ENST00000473598	289	H	GGCGTAGCCTGGGGAGAGGGAG
ENST00000347559|1|+|156136217|156136262|395|(Target-AID;-;@19;NGG;TCG:TCA;S:S;)	ENST00000347559	395	S	GCGAGGTAGGGCTGGGGGACAGG
ENST00000347559|1|+|156136217|156136262|395|(Target-AID;-;@19;NG;TCG:TCA;S:S;)	ENST00000347559	395	S	GCGAGGTAGGGCTGGGGGACAG
ENST00000361308|1|+|156136217|156136262|395|(Target-AID;-;@19;NGG;TCG:TCA;S:S;)	ENST00000361308	395	S	GCGAGGTAGGGCTGGGGGACAGG
ENST00000361308|1|+|156136217|156136262|395|(Target-AID;-;@19;NG;TCG:TCA;S:S;)	ENST00000361308	395	S	GCGAGGTAGGGCTGGGGGACAG
ENST00000368297|1|+|156136217|156136262|314|(Target-AID;-;@19;NGG;TCG:TCA;S:S;)	ENST00000368297	314	S	GCGAGGTAGGGCTGGGGGACAGG
ENST00000368297|1|+|156136217|156136262|314|(Target-AID;-;@19;NG;TCG:TCA;S:S;)	ENST00000368297	314	S	GCGAGGTAGGGCTGGGGGACAG
ENST00000368299|1|+|156136217|156136262|395|(Target-AID;-;@19;NGG;TCG:TCA;S:S;)	ENST00000368299	395	S	GCGAGGTAGGGCTGGGGGACAGG
ENST00000368299|1|+|156136217|156136262|395|(Target-AID;-;@19;NG;TCG:TCA;S:S;)	ENST00000368299	395	S	GCGAGGTAGGGCTGGGGGACAG
ENST00000368300|1|+|156136217|156136262|395|(Target-AID;-;@19;NGG;TCG:TCA;S:S;)	ENST00000368300	395	S	GCGAGGTAGGGCTGGGGGACAGG
ENST00000368300|1|+|156136217|156136262|395|(Target-AID;-;@19;NG;TCG:TCA;S:S;)	ENST00000368300	395	S	GCGAGGTAGGGCTGGGGGACAG
ENST00000368301|1|+|156136217|156136262|395|(Target-AID;-;@19;NGG;TCG:TCA;S:S;)	ENST00000368301	395	S	GCGAGGTAGGGCTGGGGGACAGG
ENST00000368301|1|+|156136217|156136262|395|(Target-AID;-;@19;NG;TCG:TCA;S:S;)	ENST00000368301	395	S	GCGAGGTAGGGCTGGGGGACAG
ENST00000448611|1|+|156136217|156136262|283|(Target-AID;-;@19;NGG;TCG:TCA;S:S;)	ENST00000448611	283	S	GCGAGGTAGGGCTGGGGGACAGG
ENST00000448611|1|+|156136217|156136262|283|(Target-AID;-;@19;NG;TCG:TCA;S:S;)	ENST00000448611	283	S	GCGAGGTAGGGCTGGGGGACAG
ENST00000473598|1|+|156136217|156136262|296|(Target-AID;-;@19;NGG;TCG:TCA;S:S;)	ENST00000473598	296	S	GCGAGGTAGGGCTGGGGGACAGG
ENST00000473598|1|+|156136217|156136262|296|(Target-AID;-;@19;NG;TCG:TCA;S:S;)	ENST00000473598	296	S	GCGAGGTAGGGCTGGGGGACAG
ENST00000347559|1|+|156136328|156136373|432|(Target-AID;+;@18;NG;CAG:TAG;Q:*;)	ENST00000347559	432	*	CACAGCACGCACGCACTAGCGG
ENST00000347559|1|+|156136328|156136373|432|(Target-AID;+;@19;NG;CAG:TAG;Q:*;)	ENST00000347559	432	*	ACAGCACGCACGCACTAGCGGG
ENST00000347559|1|+|156136328|156136373|432|(Target-AID;+;@18;NGG;CAG:TAG;Q:*;)	ENST00000347559	432	*	CACAGCACGCACGCACTAGCGGG
ENST00000361308|1|+|156136328|156136373|432|(Target-AID;+;@18;NG;CAG:TAG;Q:*;)	ENST00000361308	432	*	CACAGCACGCACGCACTAGCGG
ENST00000361308|1|+|156136328|156136373|432|(Target-AID;+;@19;NG;CAG:TAG;Q:*;)	ENST00000361308	432	*	ACAGCACGCACGCACTAGCGGG
ENST00000361308|1|+|156136328|156136373|432|(Target-AID;+;@18;NGG;CAG:TAG;Q:*;)	ENST00000361308	432	*	CACAGCACGCACGCACTAGCGGG
ENST00000368297|1|+|156136328|156136373|351|(Target-AID;+;@18;NG;CAG:TAG;Q:*;)	ENST00000368297	351	*	CACAGCACGCACGCACTAGCGG
ENST00000368297|1|+|156136328|156136373|351|(Target-AID;+;@19;NG;CAG:TAG;Q:*;)	ENST00000368297	351	*	ACAGCACGCACGCACTAGCGGG
ENST00000368297|1|+|156136328|156136373|351|(Target-AID;+;@18;NGG;CAG:TAG;Q:*;)	ENST00000368297	351	*	CACAGCACGCACGCACTAGCGGG
ENST00000368299|1|+|156136328|156136373|432|(Target-AID;+;@18;NG;CAG:TAG;Q:*;)	ENST00000368299	432	*	CACAGCACGCACGCACTAGCGG
ENST00000368299|1|+|156136328|156136373|432|(Target-AID;+;@19;NG;CAG:TAG;Q:*;)	ENST00000368299	432	*	ACAGCACGCACGCACTAGCGGG
ENST00000368299|1|+|156136328|156136373|432|(Target-AID;+;@18;NGG;CAG:TAG;Q:*;)	ENST00000368299	432	*	CACAGCACGCACGCACTAGCGGG
ENST00000368300|1|+|156136328|156136373|432|(Target-AID;+;@18;NG;CAG:TAG;Q:*;)	ENST00000368300	432	*	CACAGCACGCACGCACTAGCGG
ENST00000368300|1|+|156136328|156136373|432|(Target-AID;+;@19;NG;CAG:TAG;Q:*;)	ENST00000368300	432	*	ACAGCACGCACGCACTAGCGGG
ENST00000368300|1|+|156136328|156136373|432|(Target-AID;+;@18;NGG;CAG:TAG;Q:*;)	ENST00000368300	432	*	CACAGCACGCACGCACTAGCGGG
ENST00000368301|1|+|156136328|156136373|432|(Target-AID;+;@18;NG;CAG:TAG;Q:*;)	ENST00000368301	432	*	CACAGCACGCACGCACTAGCGG
ENST00000368301|1|+|156136328|156136373|432|(Target-AID;+;@19;NG;CAG:TAG;Q:*;)	ENST00000368301	432	*	ACAGCACGCACGCACTAGCGGG
ENST00000368301|1|+|156136328|156136373|432|(Target-AID;+;@18;NGG;CAG:TAG;Q:*;)	ENST00000368301	432	*	CACAGCACGCACGCACTAGCGGG
ENST00000448611|1|+|156136328|156136373|320|(Target-AID;+;@18;NG;CAG:TAG;Q:*;)	ENST00000448611	320	*	CACAGCACGCACGCACTAGCGG
ENST00000448611|1|+|156136328|156136373|320|(Target-AID;+;@19;NG;CAG:TAG;Q:*;)	ENST00000448611	320	*	ACAGCACGCACGCACTAGCGGG
ENST00000448611|1|+|156136328|156136373|320|(Target-AID;+;@18;NGG;CAG:TAG;Q:*;)	ENST00000448611	320	*	CACAGCACGCACGCACTAGCGGG
ENST00000473598|1|+|156136328|156136373|333|(Target-AID;+;@18;NG;CAG:TAG;Q:*;)	ENST00000473598	333	*	CACAGCACGCACGCACTAGCGG
ENST00000473598|1|+|156136328|156136373|333|(Target-AID;+;@19;NG;CAG:TAG;Q:*;)	ENST00000473598	333	*	ACAGCACGCACGCACTAGCGGG
ENST00000473598|1|+|156136328|156136373|333|(Target-AID;+;@18;NGG;CAG:TAG;Q:*;)	ENST00000473598	333	*	CACAGCACGCACGCACTAGCGGG
ENST00000347559|1|+|156136352|156136397|440|(Target-AID;-;@18;NG;GTG:ATG;V:M;)	ENST00000347559	440	M	CACGCGCCCGCTAGTGCGTGCG
ENST00000368297|1|+|156136352|156136397|359|(Target-AID;-;@18;NG;GTG:ATG;V:M;)	ENST00000368297	359	M	CACGCGCCCGCTAGTGCGTGCG
ENST00000368299|1|+|156136352|156136397|440|(Target-AID;-;@18;NG;GTG:ATG;V:M;)	ENST00000368299	440	M	CACGCGCCCGCTAGTGCGTGCG
ENST00000368300|1|+|156136352|156136397|440|(Target-AID;-;@18;NG;GTG:ATG;V:M;)	ENST00000368300	440	M	CACGCGCCCGCTAGTGCGTGCG
ENST00000368301|1|+|156136352|156136397|440|(Target-AID;-;@18;NG;GTG:ATG;V:M;)	ENST00000368301	440	M	CACGCGCCCGCTAGTGCGTGCG
ENST00000448611|1|+|156136352|156136397|328|(Target-AID;-;@18;NG;GTG:ATG;V:M;)	ENST00000448611	328	M	CACGCGCCCGCTAGTGCGTGCG
ENST00000473598|1|+|156136352|156136397|341|(Target-AID;-;@18;NG;GTG:ATG;V:M;)	ENST00000473598	341	M	CACGCGCCCGCTAGTGCGTGCG
ENST00000347559|1|+|156136370|156136415|446|(ABE;-;@14;NGG;GAT:GAC;D:D;)	ENST00000347559	446	D	CTCCTCATCCACCTCCTCCACGG
ENST00000347559|1|+|156136370|156136415|446|(ABE;-;@15;NG;GAT:GAC;D:D;)	ENST00000347559	446	D	TCCTCATCCACCTCCTCCACGG
ENST00000347559|1|+|156136370|156136415|446|(ABE;-;@14;NG;GAT:GAC;D:D;)	ENST00000347559	446	D	CTCCTCATCCACCTCCTCCACG
ENST00000368297|1|+|156136370|156136415|365|(ABE;-;@14;NGG;GAT:GAC;D:D;)	ENST00000368297	365	D	CTCCTCATCCACCTCCTCCACGG
ENST00000368297|1|+|156136370|156136415|365|(ABE;-;@15;NG;GAT:GAC;D:D;)	ENST00000368297	365	D	TCCTCATCCACCTCCTCCACGG
ENST00000368297|1|+|156136370|156136415|365|(ABE;-;@14;NG;GAT:GAC;D:D;)	ENST00000368297	365	D	CTCCTCATCCACCTCCTCCACG
ENST00000368299|1|+|156136370|156136415|446|(ABE;-;@14;NGG;GAT:GAC;D:D;)	ENST00000368299	446	D	CTCCTCATCCACCTCCTCCACGG
ENST00000368299|1|+|156136370|156136415|446|(ABE;-;@15;NG;GAT:GAC;D:D;)	ENST00000368299	446	D	TCCTCATCCACCTCCTCCACGG
ENST00000368299|1|+|156136370|156136415|446|(ABE;-;@14;NG;GAT:GAC;D:D;)	ENST00000368299	446	D	CTCCTCATCCACCTCCTCCACG
ENST00000368300|1|+|156136370|156136415|446|(ABE;-;@14;NGG;GAT:GAC;D:D;)	ENST00000368300	446	D	CTCCTCATCCACCTCCTCCACGG
ENST00000368300|1|+|156136370|156136415|446|(ABE;-;@15;NG;GAT:GAC;D:D;)	ENST00000368300	446	D	TCCTCATCCACCTCCTCCACGG
ENST00000368300|1|+|156136370|156136415|446|(ABE;-;@14;NG;GAT:GAC;D:D;)	ENST00000368300	446	D	CTCCTCATCCACCTCCTCCACG
ENST00000368301|1|+|156136370|156136415|446|(ABE;-;@14;NGG;GAT:GAC;D:D;)	ENST00000368301	446	D	CTCCTCATCCACCTCCTCCACGG
ENST00000368301|1|+|156136370|156136415|446|(ABE;-;@15;NG;GAT:GAC;D:D;)	ENST00000368301	446	D	TCCTCATCCACCTCCTCCACGG
ENST00000368301|1|+|156136370|156136415|446|(ABE;-;@14;NG;GAT:GAC;D:D;)	ENST00000368301	446	D	CTCCTCATCCACCTCCTCCACG
ENST00000448611|1|+|156136370|156136415|334|(ABE;-;@14;NGG;GAT:GAC;D:D;)	ENST00000448611	334	D	CTCCTCATCCACCTCCTCCACGG
ENST00000448611|1|+|156136370|156136415|334|(ABE;-;@15;NG;GAT:GAC;D:D;)	ENST00000448611	334	D	TCCTCATCCACCTCCTCCACGG
ENST00000448611|1|+|156136370|156136415|334|(ABE;-;@14;NG;GAT:GAC;D:D;)	ENST00000448611	334	D	CTCCTCATCCACCTCCTCCACG
ENST00000473598|1|+|156136370|156136415|347|(ABE;-;@14;NGG;GAT:GAC;D:D;)	ENST00000473598	347	D	CTCCTCATCCACCTCCTCCACGG
ENST00000473598|1|+|156136370|156136415|347|(ABE;-;@15;NG;GAT:GAC;D:D;)	ENST00000473598	347	D	TCCTCATCCACCTCCTCCACGG
ENST00000473598|1|+|156136370|156136415|347|(ABE;-;@14;NG;GAT:GAC;D:D;)	ENST00000473598	347	D	CTCCTCATCCACCTCCTCCACG
ENST00000347559|1|+|156136400|156136445|456|(ABE;+;@13;NG;AAC:GAC;N:D;)	ENST00000347559	456	D	GCTGCGCAACAAGTCCAATGAG
ENST00000347559|1|+|156136400|156136445|456|(ABE;+;@13;NGG;AAC:GAC;N:D;)	ENST00000347559	456	D	GCTGCGCAACAAGTCCAATGAGG
ENST00000368297|1|+|156136400|156136445|375|(ABE;+;@13;NG;AAC:GAC;N:D;)	ENST00000368297	375	D	GCTGCGCAACAAGTCCAATGAG
ENST00000368297|1|+|156136400|156136445|375|(ABE;+;@13;NGG;AAC:GAC;N:D;)	ENST00000368297	375	D	GCTGCGCAACAAGTCCAATGAGG
ENST00000368299|1|+|156136400|156136445|456|(ABE;+;@13;NG;AAC:GAC;N:D;)	ENST00000368299	456	D	GCTGCGCAACAAGTCCAATGAG
ENST00000368299|1|+|156136400|156136445|456|(ABE;+;@13;NGG;AAC:GAC;N:D;)	ENST00000368299	456	D	GCTGCGCAACAAGTCCAATGAGG
ENST00000368300|1|+|156136400|156136445|456|(ABE;+;@13;NG;AAC:GAC;N:D;)	ENST00000368300	456	D	GCTGCGCAACAAGTCCAATGAG
ENST00000368300|1|+|156136400|156136445|456|(ABE;+;@13;NGG;AAC:GAC;N:D;)	ENST00000368300	456	D	GCTGCGCAACAAGTCCAATGAGG
ENST00000368301|1|+|156136400|156136445|456|(ABE;+;@13;NG;AAC:GAC;N:D;)	ENST00000368301	456	D	GCTGCGCAACAAGTCCAATGAG
ENST00000368301|1|+|156136400|156136445|456|(ABE;+;@13;NGG;AAC:GAC;N:D;)	ENST00000368301	456	D	GCTGCGCAACAAGTCCAATGAGG
ENST00000448611|1|+|156136400|156136445|344|(ABE;+;@13;NG;AAC:GAC;N:D;)	ENST00000448611	344	D	GCTGCGCAACAAGTCCAATGAG
ENST00000448611|1|+|156136400|156136445|344|(ABE;+;@13;NGG;AAC:GAC;N:D;)	ENST00000448611	344	D	GCTGCGCAACAAGTCCAATGAGG
ENST00000473598|1|+|156136400|156136445|357|(ABE;+;@13;NG;AAC:GAC;N:D;)	ENST00000473598	357	D	GCTGCGCAACAAGTCCAATGAG
ENST00000473598|1|+|156136400|156136445|357|(ABE;+;@13;NGG;AAC:GAC;N:D;)	ENST00000473598	357	D	GCTGCGCAACAAGTCCAATGAGG
ENST00000347559|1|+|156136917|156136962|467|(Target-AID;-;@17;NG;TGG:TGA;W:*;)	ENST00000347559	467	*	CTGCCAATTGCCCATGGACTGG
ENST00000368297|1|+|156136917|156136962|386|(Target-AID;-;@17;NG;TGG:TGA;W:*;)	ENST00000368297	386	*	CTGCCAATTGCCCATGGACTGG
ENST00000368299|1|+|156136917|156136962|467|(Target-AID;-;@17;NG;TGG:TGA;W:*;)	ENST00000368299	467	*	CTGCCAATTGCCCATGGACTGG
ENST00000368300|1|+|156136917|156136962|467|(Target-AID;-;@17;NG;TGG:TGA;W:*;)	ENST00000368300	467	*	CTGCCAATTGCCCATGGACTGG
ENST00000368301|1|+|156136917|156136962|467|(Target-AID;-;@17;NG;TGG:TGA;W:*;)	ENST00000368301	467	*	CTGCCAATTGCCCATGGACTGG
ENST00000448611|1|+|156136917|156136962|355|(Target-AID;-;@17;NG;TGG:TGA;W:*;)	ENST00000448611	355	*	CTGCCAATTGCCCATGGACTGG
ENST00000473598|1|+|156136917|156136962|368|(Target-AID;-;@17;NG;TGG:TGA;W:*;)	ENST00000473598	368	*	CTGCCAATTGCCCATGGACTGG
ENST00000347559|1|+|156136959|156137004|481|(ABE;+;@15;NG;TAC:TGC;Y:C;)	ENST00000347559	481	C	GACTTACCGGTTCCCACCAAAG
ENST00000368297|1|+|156136959|156137004|400|(ABE;+;@15;NG;TAC:TGC;Y:C;)	ENST00000368297	400	C	GACTTACCGGTTCCCACCAAAG
ENST00000368299|1|+|156136959|156137004|481|(ABE;+;@15;NG;TAC:TGC;Y:C;)	ENST00000368299	481	C	GACTTACCGGTTCCCACCAAAG
ENST00000368300|1|+|156136959|156137004|481|(ABE;+;@15;NG;TAC:TGC;Y:C;)	ENST00000368300	481	C	GACTTACCGGTTCCCACCAAAG
ENST00000368301|1|+|156136959|156137004|481|(ABE;+;@15;NG;TAC:TGC;Y:C;)	ENST00000368301	481	C	GACTTACCGGTTCCCACCAAAG
ENST00000448611|1|+|156136959|156137004|369|(ABE;+;@15;NG;TAC:TGC;Y:C;)	ENST00000448611	369	C	GACTTACCGGTTCCCACCAAAG
ENST00000473598|1|+|156136959|156137004|382|(ABE;+;@15;NG;TAC:TGC;Y:C;)	ENST00000473598	382	C	GACTTACCGGTTCCCACCAAAG
ENST00000347559|1|+|156136995|156137040|493|(Target-AID;+;@17;NG;CAG:TAG;Q:*;)	ENST00000347559	493	*	GGGCAGGTGGTGACGGTGAGTG
ENST00000347559|1|+|156136995|156137040|493|(Target-AID;+;@18;NG;CAG:TAG;Q:*;)	ENST00000347559	493	*	GGCAGGTGGTGACGGTGAGTGG
ENST00000347559|1|+|156136995|156137040|493|(Target-AID;+;@17;NGG;CAG:TAG;Q:*;)	ENST00000347559	493	*	GGGCAGGTGGTGACGGTGAGTGG
ENST00000368297|1|+|156136995|156137040|412|(Target-AID;+;@17;NG;CAG:TAG;Q:*;)	ENST00000368297	412	*	GGGCAGGTGGTGACGGTGAGTG
ENST00000368297|1|+|156136995|156137040|412|(Target-AID;+;@18;NG;CAG:TAG;Q:*;)	ENST00000368297	412	*	GGCAGGTGGTGACGGTGAGTGG
ENST00000368297|1|+|156136995|156137040|412|(Target-AID;+;@17;NGG;CAG:TAG;Q:*;)	ENST00000368297	412	*	GGGCAGGTGGTGACGGTGAGTGG
ENST00000368299|1|+|156136995|156137040|493|(Target-AID;+;@17;NG;CAG:TAG;Q:*;)	ENST00000368299	493	*	GGGCAGGTGGTGACGGTGAGTG
ENST00000368299|1|+|156136995|156137040|493|(Target-AID;+;@18;NG;CAG:TAG;Q:*;)	ENST00000368299	493	*	GGCAGGTGGTGACGGTGAGTGG
ENST00000368299|1|+|156136995|156137040|493|(Target-AID;+;@17;NGG;CAG:TAG;Q:*;)	ENST00000368299	493	*	GGGCAGGTGGTGACGGTGAGTGG
ENST00000368300|1|+|156136995|156137040|493|(Target-AID;+;@17;NG;CAG:TAG;Q:*;)	ENST00000368300	493	*	GGGCAGGTGGTGACGGTGAGTG
ENST00000368300|1|+|156136995|156137040|493|(Target-AID;+;@18;NG;CAG:TAG;Q:*;)	ENST00000368300	493	*	GGCAGGTGGTGACGGTGAGTGG
ENST00000368300|1|+|156136995|156137040|493|(Target-AID;+;@17;NGG;CAG:TAG;Q:*;)	ENST00000368300	493	*	GGGCAGGTGGTGACGGTGAGTGG
ENST00000368301|1|+|156136995|156137040|493|(Target-AID;+;@17;NG;CAG:TAG;Q:*;)	ENST00000368301	493	*	GGGCAGGTGGTGACGGTGAGTG
ENST00000368301|1|+|156136995|156137040|493|(Target-AID;+;@18;NG;CAG:TAG;Q:*;)	ENST00000368301	493	*	GGCAGGTGGTGACGGTGAGTGG
ENST00000368301|1|+|156136995|156137040|493|(Target-AID;+;@17;NGG;CAG:TAG;Q:*;)	ENST00000368301	493	*	GGGCAGGTGGTGACGGTGAGTGG
ENST00000448611|1|+|156136995|156137040|381|(Target-AID;+;@17;NG;CAG:TAG;Q:*;)	ENST00000448611	381	*	GGGCAGGTGGTGACGGTGAGTG
ENST00000448611|1|+|156136995|156137040|381|(Target-AID;+;@18;NG;CAG:TAG;Q:*;)	ENST00000448611	381	*	GGCAGGTGGTGACGGTGAGTGG
ENST00000448611|1|+|156136995|156137040|381|(Target-AID;+;@17;NGG;CAG:TAG;Q:*;)	ENST00000448611	381	*	GGGCAGGTGGTGACGGTGAGTGG
ENST00000473598|1|+|156136995|156137040|394|(Target-AID;+;@17;NG;CAG:TAG;Q:*;)	ENST00000473598	394	*	GGGCAGGTGGTGACGGTGAGTG
ENST00000473598|1|+|156136995|156137040|394|(Target-AID;+;@18;NG;CAG:TAG;Q:*;)	ENST00000473598	394	*	GGCAGGTGGTGACGGTGAGTGG
ENST00000473598|1|+|156136995|156137040|394|(Target-AID;+;@17;NGG;CAG:TAG;Q:*;)	ENST00000473598	394	*	GGGCAGGTGGTGACGGTGAGTGG
ENST00000347559|1|+|156137142|156137187|514|(ABE;-;@14;NGG;TGG:CGG;W:R;)	ENST00000347559	514	R	CCTTCCACACCAGGTCGGTAGGG
ENST00000347559|1|+|156137142|156137187|514|(ABE;-;@13;NGG;TGG:CGG;W:R;)	ENST00000347559	514	R	GCCTTCCACACCAGGTCGGTAGG
ENST00000347559|1|+|156137142|156137187|514|(ABE;-;@14;NG;TGG:CGG;W:R;)	ENST00000347559	514	R	CCTTCCACACCAGGTCGGTAGG
ENST00000347559|1|+|156137142|156137187|514|(ABE;-;@13;NG;TGG:CGG;W:R;)	ENST00000347559	514	R	GCCTTCCACACCAGGTCGGTAG
ENST00000368297|1|+|156137142|156137187|433|(ABE;-;@14;NGG;TGG:CGG;W:R;)	ENST00000368297	433	R	CCTTCCACACCAGGTCGGTAGGG
ENST00000368297|1|+|156137142|156137187|433|(ABE;-;@13;NGG;TGG:CGG;W:R;)	ENST00000368297	433	R	GCCTTCCACACCAGGTCGGTAGG
ENST00000368297|1|+|156137142|156137187|433|(ABE;-;@14;NG;TGG:CGG;W:R;)	ENST00000368297	433	R	CCTTCCACACCAGGTCGGTAGG
ENST00000368297|1|+|156137142|156137187|433|(ABE;-;@13;NG;TGG:CGG;W:R;)	ENST00000368297	433	R	GCCTTCCACACCAGGTCGGTAG
ENST00000368299|1|+|156137142|156137187|514|(ABE;-;@14;NGG;TGG:CGG;W:R;)	ENST00000368299	514	R	CCTTCCACACCAGGTCGGTAGGG
ENST00000368299|1|+|156137142|156137187|514|(ABE;-;@13;NGG;TGG:CGG;W:R;)	ENST00000368299	514	R	GCCTTCCACACCAGGTCGGTAGG
ENST00000368299|1|+|156137142|156137187|514|(ABE;-;@14;NG;TGG:CGG;W:R;)	ENST00000368299	514	R	CCTTCCACACCAGGTCGGTAGG
ENST00000368299|1|+|156137142|156137187|514|(ABE;-;@13;NG;TGG:CGG;W:R;)	ENST00000368299	514	R	GCCTTCCACACCAGGTCGGTAG
ENST00000368300|1|+|156137142|156137187|514|(ABE;-;@14;NGG;TGG:CGG;W:R;)	ENST00000368300	514	R	CCTTCCACACCAGGTCGGTAGGG
ENST00000368300|1|+|156137142|156137187|514|(ABE;-;@13;NGG;TGG:CGG;W:R;)	ENST00000368300	514	R	GCCTTCCACACCAGGTCGGTAGG
ENST00000368300|1|+|156137142|156137187|514|(ABE;-;@14;NG;TGG:CGG;W:R;)	ENST00000368300	514	R	CCTTCCACACCAGGTCGGTAGG
ENST00000368300|1|+|156137142|156137187|514|(ABE;-;@13;NG;TGG:CGG;W:R;)	ENST00000368300	514	R	GCCTTCCACACCAGGTCGGTAG
ENST00000368301|1|+|156137142|156137187|514|(ABE;-;@14;NGG;TGG:CGG;W:R;)	ENST00000368301	514	R	CCTTCCACACCAGGTCGGTAGGG
ENST00000368301|1|+|156137142|156137187|514|(ABE;-;@13;NGG;TGG:CGG;W:R;)	ENST00000368301	514	R	GCCTTCCACACCAGGTCGGTAGG
ENST00000368301|1|+|156137142|156137187|514|(ABE;-;@14;NG;TGG:CGG;W:R;)	ENST00000368301	514	R	CCTTCCACACCAGGTCGGTAGG
ENST00000368301|1|+|156137142|156137187|514|(ABE;-;@13;NG;TGG:CGG;W:R;)	ENST00000368301	514	R	GCCTTCCACACCAGGTCGGTAG
ENST00000448611|1|+|156137142|156137187|402|(ABE;-;@14;NGG;TGG:CGG;W:R;)	ENST00000448611	402	R	CCTTCCACACCAGGTCGGTAGGG
ENST00000448611|1|+|156137142|156137187|402|(ABE;-;@13;NGG;TGG:CGG;W:R;)	ENST00000448611	402	R	GCCTTCCACACCAGGTCGGTAGG
ENST00000448611|1|+|156137142|156137187|402|(ABE;-;@14;NG;TGG:CGG;W:R;)	ENST00000448611	402	R	CCTTCCACACCAGGTCGGTAGG
ENST00000448611|1|+|156137142|156137187|402|(ABE;-;@13;NG;TGG:CGG;W:R;)	ENST00000448611	402	R	GCCTTCCACACCAGGTCGGTAG
ENST00000473598|1|+|156137142|156137187|415|(ABE;-;@14;NGG;TGG:CGG;W:R;)	ENST00000473598	415	R	CCTTCCACACCAGGTCGGTAGGG
ENST00000473598|1|+|156137142|156137187|415|(ABE;-;@13;NGG;TGG:CGG;W:R;)	ENST00000473598	415	R	GCCTTCCACACCAGGTCGGTAGG
ENST00000473598|1|+|156137142|156137187|415|(ABE;-;@14;NG;TGG:CGG;W:R;)	ENST00000473598	415	R	CCTTCCACACCAGGTCGGTAGG
ENST00000473598|1|+|156137142|156137187|415|(ABE;-;@13;NG;TGG:CGG;W:R;)	ENST00000473598	415	R	GCCTTCCACACCAGGTCGGTAG
ENST00000347559|1|+|156137151|156137196|517|(Target-AID;-;@17;NG;CAG:CAA;Q:Q;)	ENST00000347559	517	Q	GTTCTGTGCCTTCCACACCAGG
ENST00000368297|1|+|156137151|156137196|436|(Target-AID;-;@17;NG;CAG:CAA;Q:Q;)	ENST00000368297	436	Q	GTTCTGTGCCTTCCACACCAGG
ENST00000368299|1|+|156137151|156137196|517|(Target-AID;-;@17;NG;CAG:CAA;Q:Q;)	ENST00000368299	517	Q	GTTCTGTGCCTTCCACACCAGG
ENST00000368300|1|+|156137151|156137196|517|(Target-AID;-;@17;NG;CAG:CAA;Q:Q;)	ENST00000368300	517	Q	GTTCTGTGCCTTCCACACCAGG
ENST00000368301|1|+|156137151|156137196|517|(Target-AID;-;@17;NG;CAG:CAA;Q:Q;)	ENST00000368301	517	Q	GTTCTGTGCCTTCCACACCAGG
ENST00000448611|1|+|156137151|156137196|405|(Target-AID;-;@17;NG;CAG:CAA;Q:Q;)	ENST00000448611	405	Q	GTTCTGTGCCTTCCACACCAGG
ENST00000473598|1|+|156137151|156137196|418|(Target-AID;-;@17;NG;CAG:CAA;Q:Q;)	ENST00000473598	418	Q	GTTCTGTGCCTTCCACACCAGG
ENST00000347559|1|+|156137166|156137211|522|(Target-AID;+;@17;NG;TGC:TGT;C:C;)	ENST00000347559	522	C	CTGCGGGAACAGCCTGCGTACG
ENST00000347559|1|+|156137166|156137211|522|(Target-AID;+;@18;NG;TGC:TGT;C:C;)	ENST00000347559	522	C	TGCGGGAACAGCCTGCGTACGG
ENST00000347559|1|+|156137166|156137211|522|(Target-AID;+;@17;NGG;TGC:TGT;C:C;)	ENST00000347559	522	C	CTGCGGGAACAGCCTGCGTACGG
ENST00000368297|1|+|156137166|156137211|441|(Target-AID;+;@17;NG;TGC:TGT;C:C;)	ENST00000368297	441	C	CTGCGGGAACAGCCTGCGTACG
ENST00000368297|1|+|156137166|156137211|441|(Target-AID;+;@18;NG;TGC:TGT;C:C;)	ENST00000368297	441	C	TGCGGGAACAGCCTGCGTACGG
ENST00000368297|1|+|156137166|156137211|441|(Target-AID;+;@17;NGG;TGC:TGT;C:C;)	ENST00000368297	441	C	CTGCGGGAACAGCCTGCGTACGG
ENST00000368299|1|+|156137166|156137211|522|(Target-AID;+;@17;NG;TGC:TGT;C:C;)	ENST00000368299	522	C	CTGCGGGAACAGCCTGCGTACG
ENST00000368299|1|+|156137166|156137211|522|(Target-AID;+;@18;NG;TGC:TGT;C:C;)	ENST00000368299	522	C	TGCGGGAACAGCCTGCGTACGG
ENST00000368299|1|+|156137166|156137211|522|(Target-AID;+;@17;NGG;TGC:TGT;C:C;)	ENST00000368299	522	C	CTGCGGGAACAGCCTGCGTACGG
ENST00000368300|1|+|156137166|156137211|522|(Target-AID;+;@17;NG;TGC:TGT;C:C;)	ENST00000368300	522	C	CTGCGGGAACAGCCTGCGTACG
ENST00000368300|1|+|156137166|156137211|522|(Target-AID;+;@18;NG;TGC:TGT;C:C;)	ENST00000368300	522	C	TGCGGGAACAGCCTGCGTACGG
ENST00000368300|1|+|156137166|156137211|522|(Target-AID;+;@17;NGG;TGC:TGT;C:C;)	ENST00000368300	522	C	CTGCGGGAACAGCCTGCGTACGG
ENST00000368301|1|+|156137166|156137211|522|(Target-AID;+;@17;NG;TGC:TGT;C:C;)	ENST00000368301	522	C	CTGCGGGAACAGCCTGCGTACG
ENST00000368301|1|+|156137166|156137211|522|(Target-AID;+;@18;NG;TGC:TGT;C:C;)	ENST00000368301	522	C	TGCGGGAACAGCCTGCGTACGG
ENST00000368301|1|+|156137166|156137211|522|(Target-AID;+;@17;NGG;TGC:TGT;C:C;)	ENST00000368301	522	C	CTGCGGGAACAGCCTGCGTACGG
ENST00000448611|1|+|156137166|156137211|410|(Target-AID;+;@17;NG;TGC:TGT;C:C;)	ENST00000448611	410	C	CTGCGGGAACAGCCTGCGTACG
ENST00000448611|1|+|156137166|156137211|410|(Target-AID;+;@18;NG;TGC:TGT;C:C;)	ENST00000448611	410	C	TGCGGGAACAGCCTGCGTACGG
ENST00000448611|1|+|156137166|156137211|410|(Target-AID;+;@17;NGG;TGC:TGT;C:C;)	ENST00000448611	410	C	CTGCGGGAACAGCCTGCGTACGG
ENST00000473598|1|+|156137166|156137211|423|(Target-AID;+;@17;NG;TGC:TGT;C:C;)	ENST00000473598	423	C	CTGCGGGAACAGCCTGCGTACG
ENST00000473598|1|+|156137166|156137211|423|(Target-AID;+;@18;NG;TGC:TGT;C:C;)	ENST00000473598	423	C	TGCGGGAACAGCCTGCGTACGG
ENST00000473598|1|+|156137166|156137211|423|(Target-AID;+;@17;NGG;TGC:TGT;C:C;)	ENST00000473598	423	C	CTGCGGGAACAGCCTGCGTACGG
ENST00000347559|1|+|156137184|156137229|528|(Target-AID;+;@19;NG;ACG:ATG;T:M;)	ENST00000347559	528	M	ACGGCTCTCATCAACTCCACTG
ENST00000347559|1|+|156137184|156137229|528|(Target-AID;+;@19;NGG;ACG:ATG;T:M;)	ENST00000347559	528	M	ACGGCTCTCATCAACTCCACTGG
ENST00000361308|1|+|156137184|156137229|443|(Target-AID;+;@19;NG;ACG:ATG;T:M;)	ENST00000361308	443	M	ACGGCTCTCATCAACTCCACTG
ENST00000361308|1|+|156137184|156137229|443|(Target-AID;+;@19;NGG;ACG:ATG;T:M;)	ENST00000361308	443	M	ACGGCTCTCATCAACTCCACTGG
ENST00000368297|1|+|156137184|156137229|447|(Target-AID;+;@19;NG;ACG:ATG;T:M;)	ENST00000368297	447	M	ACGGCTCTCATCAACTCCACTG
ENST00000368297|1|+|156137184|156137229|447|(Target-AID;+;@19;NGG;ACG:ATG;T:M;)	ENST00000368297	447	M	ACGGCTCTCATCAACTCCACTGG
ENST00000368299|1|+|156137184|156137229|528|(Target-AID;+;@19;NG;ACG:ATG;T:M;)	ENST00000368299	528	M	ACGGCTCTCATCAACTCCACTG
ENST00000368299|1|+|156137184|156137229|528|(Target-AID;+;@19;NGG;ACG:ATG;T:M;)	ENST00000368299	528	M	ACGGCTCTCATCAACTCCACTGG
ENST00000368300|1|+|156137184|156137229|528|(Target-AID;+;@19;NG;ACG:ATG;T:M;)	ENST00000368300	528	M	ACGGCTCTCATCAACTCCACTG
ENST00000368300|1|+|156137184|156137229|528|(Target-AID;+;@19;NGG;ACG:ATG;T:M;)	ENST00000368300	528	M	ACGGCTCTCATCAACTCCACTGG
ENST00000368301|1|+|156137184|156137229|528|(Target-AID;+;@19;NG;ACG:ATG;T:M;)	ENST00000368301	528	M	ACGGCTCTCATCAACTCCACTG
ENST00000368301|1|+|156137184|156137229|528|(Target-AID;+;@19;NGG;ACG:ATG;T:M;)	ENST00000368301	528	M	ACGGCTCTCATCAACTCCACTGG
ENST00000448611|1|+|156137184|156137229|416|(Target-AID;+;@19;NG;ACG:ATG;T:M;)	ENST00000448611	416	M	ACGGCTCTCATCAACTCCACTG
ENST00000448611|1|+|156137184|156137229|416|(Target-AID;+;@19;NGG;ACG:ATG;T:M;)	ENST00000448611	416	M	ACGGCTCTCATCAACTCCACTGG
ENST00000473598|1|+|156137184|156137229|429|(Target-AID;+;@19;NG;ACG:ATG;T:M;)	ENST00000473598	429	M	ACGGCTCTCATCAACTCCACTG
ENST00000473598|1|+|156137184|156137229|429|(Target-AID;+;@19;NGG;ACG:ATG;T:M;)	ENST00000473598	429	M	ACGGCTCTCATCAACTCCACTGG
ENST00000347559|1|+|156137187|156137232|529|(Target-AID;+;@17;NG;GCT:GTT;A:V;)	ENST00000347559	529	V	CGGCTCTCATCAACTCCACTGG
ENST00000347559|1|+|156137187|156137232|529|(Target-AID;+;@18;NG;GCT:GTT;A:V;)	ENST00000347559	529	V	GGCTCTCATCAACTCCACTGGG
ENST00000347559|1|+|156137187|156137232|529|(Target-AID;+;@17;NGG;GCT:GTT;A:V;)	ENST00000347559	529	V	CGGCTCTCATCAACTCCACTGGG
ENST00000347559|1|+|156137187|156137232|529|(Target-AID;+;@18;NGG;GCT:GTT;A:V;)	ENST00000347559	529	V	GGCTCTCATCAACTCCACTGGGG
ENST00000361308|1|+|156137187|156137232|444|(Target-AID;+;@17;NG;GCT:GTT;A:V;)	ENST00000361308	444	V	CGGCTCTCATCAACTCCACTGG
ENST00000361308|1|+|156137187|156137232|444|(Target-AID;+;@18;NG;GCT:GTT;A:V;)	ENST00000361308	444	V	GGCTCTCATCAACTCCACTGGG
ENST00000361308|1|+|156137187|156137232|444|(Target-AID;+;@17;NGG;GCT:GTT;A:V;)	ENST00000361308	444	V	CGGCTCTCATCAACTCCACTGGG
ENST00000361308|1|+|156137187|156137232|444|(Target-AID;+;@18;NGG;GCT:GTT;A:V;)	ENST00000361308	444	V	GGCTCTCATCAACTCCACTGGGG
ENST00000368297|1|+|156137187|156137232|448|(Target-AID;+;@17;NG;GCT:GTT;A:V;)	ENST00000368297	448	V	CGGCTCTCATCAACTCCACTGG
ENST00000368297|1|+|156137187|156137232|448|(Target-AID;+;@18;NG;GCT:GTT;A:V;)	ENST00000368297	448	V	GGCTCTCATCAACTCCACTGGG
ENST00000368297|1|+|156137187|156137232|448|(Target-AID;+;@17;NGG;GCT:GTT;A:V;)	ENST00000368297	448	V	CGGCTCTCATCAACTCCACTGGG
ENST00000368297|1|+|156137187|156137232|448|(Target-AID;+;@18;NGG;GCT:GTT;A:V;)	ENST00000368297	448	V	GGCTCTCATCAACTCCACTGGGG
ENST00000368299|1|+|156137187|156137232|529|(Target-AID;+;@17;NG;GCT:GTT;A:V;)	ENST00000368299	529	V	CGGCTCTCATCAACTCCACTGG
ENST00000368299|1|+|156137187|156137232|529|(Target-AID;+;@18;NG;GCT:GTT;A:V;)	ENST00000368299	529	V	GGCTCTCATCAACTCCACTGGG
ENST00000368299|1|+|156137187|156137232|529|(Target-AID;+;@17;NGG;GCT:GTT;A:V;)	ENST00000368299	529	V	CGGCTCTCATCAACTCCACTGGG
ENST00000368299|1|+|156137187|156137232|529|(Target-AID;+;@18;NGG;GCT:GTT;A:V;)	ENST00000368299	529	V	GGCTCTCATCAACTCCACTGGGG
ENST00000368300|1|+|156137187|156137232|529|(Target-AID;+;@17;NG;GCT:GTT;A:V;)	ENST00000368300	529	V	CGGCTCTCATCAACTCCACTGG
ENST00000368300|1|+|156137187|156137232|529|(Target-AID;+;@18;NG;GCT:GTT;A:V;)	ENST00000368300	529	V	GGCTCTCATCAACTCCACTGGG
ENST00000368300|1|+|156137187|156137232|529|(Target-AID;+;@17;NGG;GCT:GTT;A:V;)	ENST00000368300	529	V	CGGCTCTCATCAACTCCACTGGG
ENST00000368300|1|+|156137187|156137232|529|(Target-AID;+;@18;NGG;GCT:GTT;A:V;)	ENST00000368300	529	V	GGCTCTCATCAACTCCACTGGGG
ENST00000368301|1|+|156137187|156137232|529|(Target-AID;+;@17;NG;GCT:GTT;A:V;)	ENST00000368301	529	V	CGGCTCTCATCAACTCCACTGG
ENST00000368301|1|+|156137187|156137232|529|(Target-AID;+;@18;NG;GCT:GTT;A:V;)	ENST00000368301	529	V	GGCTCTCATCAACTCCACTGGG
ENST00000368301|1|+|156137187|156137232|529|(Target-AID;+;@17;NGG;GCT:GTT;A:V;)	ENST00000368301	529	V	CGGCTCTCATCAACTCCACTGGG
ENST00000368301|1|+|156137187|156137232|529|(Target-AID;+;@18;NGG;GCT:GTT;A:V;)	ENST00000368301	529	V	GGCTCTCATCAACTCCACTGGGG
ENST00000448611|1|+|156137187|156137232|417|(Target-AID;+;@17;NG;GCT:GTT;A:V;)	ENST00000448611	417	V	CGGCTCTCATCAACTCCACTGG
ENST00000448611|1|+|156137187|156137232|417|(Target-AID;+;@18;NG;GCT:GTT;A:V;)	ENST00000448611	417	V	GGCTCTCATCAACTCCACTGGG
ENST00000448611|1|+|156137187|156137232|417|(Target-AID;+;@17;NGG;GCT:GTT;A:V;)	ENST00000448611	417	V	CGGCTCTCATCAACTCCACTGGG
ENST00000448611|1|+|156137187|156137232|417|(Target-AID;+;@18;NGG;GCT:GTT;A:V;)	ENST00000448611	417	V	GGCTCTCATCAACTCCACTGGGG
ENST00000473598|1|+|156137187|156137232|430|(Target-AID;+;@17;NG;GCT:GTT;A:V;)	ENST00000473598	430	V	CGGCTCTCATCAACTCCACTGG
ENST00000473598|1|+|156137187|156137232|430|(Target-AID;+;@18;NG;GCT:GTT;A:V;)	ENST00000473598	430	V	GGCTCTCATCAACTCCACTGGG
ENST00000473598|1|+|156137187|156137232|430|(Target-AID;+;@17;NGG;GCT:GTT;A:V;)	ENST00000473598	430	V	CGGCTCTCATCAACTCCACTGGG
ENST00000473598|1|+|156137187|156137232|430|(Target-AID;+;@18;NGG;GCT:GTT;A:V;)	ENST00000473598	430	V	GGCTCTCATCAACTCCACTGGGG
ENST00000361308|1|+|156137641|156137686|455|(ABE;-;@17;NGG;ATG:ACG;M:T;)	ENST00000361308	455	T	CGCATGGCCACTTCCTGGTGGGG
ENST00000361308|1|+|156137641|156137686|455|(ABE;-;@16;NGG;ATG:ACG;M:T;)	ENST00000361308	455	T	GCGCATGGCCACTTCCTGGTGGG
ENST00000361308|1|+|156137641|156137686|455|(ABE;-;@15;NGG;ATG:ACG;M:T;)	ENST00000361308	455	T	TGCGCATGGCCACTTCCTGGTGG
ENST00000361308|1|+|156137641|156137686|455|(ABE;-;@17;NG;ATG:ACG;M:T;)	ENST00000361308	455	T	CGCATGGCCACTTCCTGGTGGG
ENST00000361308|1|+|156137641|156137686|455|(ABE;-;@16;NG;ATG:ACG;M:T;)	ENST00000361308	455	T	GCGCATGGCCACTTCCTGGTGG
ENST00000361308|1|+|156137641|156137686|455|(ABE;-;@15;NG;ATG:ACG;M:T;)	ENST00000361308	455	T	TGCGCATGGCCACTTCCTGGTG
ENST00000361308|1|+|156137641|156137686|455|(ABE;-;@13;NG;ATG:ACG;M:T;)	ENST00000361308	455	T	CTTGCGCATGGCCACTTCCTGG
ENST00000368297|1|+|156137641|156137686|459|(ABE;-;@17;NGG;ATG:ACG;M:T;)	ENST00000368297	459	T	CGCATGGCCACTTCCTGGTGGGG
ENST00000368297|1|+|156137641|156137686|459|(ABE;-;@16;NGG;ATG:ACG;M:T;)	ENST00000368297	459	T	GCGCATGGCCACTTCCTGGTGGG
ENST00000368297|1|+|156137641|156137686|459|(ABE;-;@15;NGG;ATG:ACG;M:T;)	ENST00000368297	459	T	TGCGCATGGCCACTTCCTGGTGG
ENST00000368297|1|+|156137641|156137686|459|(ABE;-;@17;NG;ATG:ACG;M:T;)	ENST00000368297	459	T	CGCATGGCCACTTCCTGGTGGG
ENST00000368297|1|+|156137641|156137686|459|(ABE;-;@16;NG;ATG:ACG;M:T;)	ENST00000368297	459	T	GCGCATGGCCACTTCCTGGTGG
ENST00000368297|1|+|156137641|156137686|459|(ABE;-;@15;NG;ATG:ACG;M:T;)	ENST00000368297	459	T	TGCGCATGGCCACTTCCTGGTG
ENST00000368297|1|+|156137641|156137686|459|(ABE;-;@13;NG;ATG:ACG;M:T;)	ENST00000368297	459	T	CTTGCGCATGGCCACTTCCTGG
ENST00000368299|1|+|156137641|156137686|540|(ABE;-;@17;NGG;ATG:ACG;M:T;)	ENST00000368299	540	T	CGCATGGCCACTTCCTGGTGGGG
ENST00000368299|1|+|156137641|156137686|540|(ABE;-;@16;NGG;ATG:ACG;M:T;)	ENST00000368299	540	T	GCGCATGGCCACTTCCTGGTGGG
ENST00000368299|1|+|156137641|156137686|540|(ABE;-;@15;NGG;ATG:ACG;M:T;)	ENST00000368299	540	T	TGCGCATGGCCACTTCCTGGTGG
ENST00000368299|1|+|156137641|156137686|540|(ABE;-;@17;NG;ATG:ACG;M:T;)	ENST00000368299	540	T	CGCATGGCCACTTCCTGGTGGG
ENST00000368299|1|+|156137641|156137686|540|(ABE;-;@16;NG;ATG:ACG;M:T;)	ENST00000368299	540	T	GCGCATGGCCACTTCCTGGTGG
ENST00000368299|1|+|156137641|156137686|540|(ABE;-;@15;NG;ATG:ACG;M:T;)	ENST00000368299	540	T	TGCGCATGGCCACTTCCTGGTG
ENST00000368299|1|+|156137641|156137686|540|(ABE;-;@13;NG;ATG:ACG;M:T;)	ENST00000368299	540	T	CTTGCGCATGGCCACTTCCTGG
ENST00000368300|1|+|156137641|156137686|540|(ABE;-;@17;NGG;ATG:ACG;M:T;)	ENST00000368300	540	T	CGCATGGCCACTTCCTGGTGGGG
ENST00000368300|1|+|156137641|156137686|540|(ABE;-;@16;NGG;ATG:ACG;M:T;)	ENST00000368300	540	T	GCGCATGGCCACTTCCTGGTGGG
ENST00000368300|1|+|156137641|156137686|540|(ABE;-;@15;NGG;ATG:ACG;M:T;)	ENST00000368300	540	T	TGCGCATGGCCACTTCCTGGTGG
ENST00000368300|1|+|156137641|156137686|540|(ABE;-;@17;NG;ATG:ACG;M:T;)	ENST00000368300	540	T	CGCATGGCCACTTCCTGGTGGG
ENST00000368300|1|+|156137641|156137686|540|(ABE;-;@16;NG;ATG:ACG;M:T;)	ENST00000368300	540	T	GCGCATGGCCACTTCCTGGTGG
ENST00000368300|1|+|156137641|156137686|540|(ABE;-;@15;NG;ATG:ACG;M:T;)	ENST00000368300	540	T	TGCGCATGGCCACTTCCTGGTG
ENST00000368300|1|+|156137641|156137686|540|(ABE;-;@13;NG;ATG:ACG;M:T;)	ENST00000368300	540	T	CTTGCGCATGGCCACTTCCTGG
ENST00000368301|1|+|156137641|156137686|540|(ABE;-;@17;NGG;ATG:ACG;M:T;)	ENST00000368301	540	T	CGCATGGCCACTTCCTGGTGGGG
ENST00000368301|1|+|156137641|156137686|540|(ABE;-;@16;NGG;ATG:ACG;M:T;)	ENST00000368301	540	T	GCGCATGGCCACTTCCTGGTGGG
ENST00000368301|1|+|156137641|156137686|540|(ABE;-;@15;NGG;ATG:ACG;M:T;)	ENST00000368301	540	T	TGCGCATGGCCACTTCCTGGTGG
ENST00000368301|1|+|156137641|156137686|540|(ABE;-;@17;NG;ATG:ACG;M:T;)	ENST00000368301	540	T	CGCATGGCCACTTCCTGGTGGG
ENST00000368301|1|+|156137641|156137686|540|(ABE;-;@16;NG;ATG:ACG;M:T;)	ENST00000368301	540	T	GCGCATGGCCACTTCCTGGTGG
ENST00000368301|1|+|156137641|156137686|540|(ABE;-;@15;NG;ATG:ACG;M:T;)	ENST00000368301	540	T	TGCGCATGGCCACTTCCTGGTG
ENST00000368301|1|+|156137641|156137686|540|(ABE;-;@13;NG;ATG:ACG;M:T;)	ENST00000368301	540	T	CTTGCGCATGGCCACTTCCTGG
ENST00000448611|1|+|156137641|156137686|428|(ABE;-;@17;NGG;ATG:ACG;M:T;)	ENST00000448611	428	T	CGCATGGCCACTTCCTGGTGGGG
ENST00000448611|1|+|156137641|156137686|428|(ABE;-;@16;NGG;ATG:ACG;M:T;)	ENST00000448611	428	T	GCGCATGGCCACTTCCTGGTGGG
ENST00000448611|1|+|156137641|156137686|428|(ABE;-;@15;NGG;ATG:ACG;M:T;)	ENST00000448611	428	T	TGCGCATGGCCACTTCCTGGTGG
ENST00000448611|1|+|156137641|156137686|428|(ABE;-;@17;NG;ATG:ACG;M:T;)	ENST00000448611	428	T	CGCATGGCCACTTCCTGGTGGG
ENST00000448611|1|+|156137641|156137686|428|(ABE;-;@16;NG;ATG:ACG;M:T;)	ENST00000448611	428	T	GCGCATGGCCACTTCCTGGTGG
ENST00000448611|1|+|156137641|156137686|428|(ABE;-;@15;NG;ATG:ACG;M:T;)	ENST00000448611	428	T	TGCGCATGGCCACTTCCTGGTG
ENST00000448611|1|+|156137641|156137686|428|(ABE;-;@13;NG;ATG:ACG;M:T;)	ENST00000448611	428	T	CTTGCGCATGGCCACTTCCTGG
ENST00000473598|1|+|156137641|156137686|441|(ABE;-;@17;NGG;ATG:ACG;M:T;)	ENST00000473598	441	T	CGCATGGCCACTTCCTGGTGGGG
ENST00000473598|1|+|156137641|156137686|441|(ABE;-;@16;NGG;ATG:ACG;M:T;)	ENST00000473598	441	T	GCGCATGGCCACTTCCTGGTGGG
ENST00000473598|1|+|156137641|156137686|441|(ABE;-;@15;NGG;ATG:ACG;M:T;)	ENST00000473598	441	T	TGCGCATGGCCACTTCCTGGTGG
ENST00000473598|1|+|156137641|156137686|441|(ABE;-;@17;NG;ATG:ACG;M:T;)	ENST00000473598	441	T	CGCATGGCCACTTCCTGGTGGG
ENST00000473598|1|+|156137641|156137686|441|(ABE;-;@16;NG;ATG:ACG;M:T;)	ENST00000473598	441	T	GCGCATGGCCACTTCCTGGTGG
ENST00000473598|1|+|156137641|156137686|441|(ABE;-;@15;NG;ATG:ACG;M:T;)	ENST00000473598	441	T	TGCGCATGGCCACTTCCTGGTG
ENST00000473598|1|+|156137641|156137686|441|(ABE;-;@13;NG;ATG:ACG;M:T;)	ENST00000473598	441	T	CTTGCGCATGGCCACTTCCTGG
ENST00000361308|1|+|156137641|156137686|455|(Target-AID;-;@18;NGG;ATG:ATA;M:I;)	ENST00000361308	455	I	CGCATGGCCACTTCCTGGTGGGG
ENST00000361308|1|+|156137641|156137686|455|(Target-AID;-;@19;NG;ATG:ATA;M:I;)	ENST00000361308	455	I	GCATGGCCACTTCCTGGTGGGG
ENST00000361308|1|+|156137641|156137686|455|(Target-AID;-;@18;NG;ATG:ATA;M:I;)	ENST00000361308	455	I	CGCATGGCCACTTCCTGGTGGG
ENST00000368297|1|+|156137641|156137686|459|(Target-AID;-;@18;NGG;ATG:ATA;M:I;)	ENST00000368297	459	I	CGCATGGCCACTTCCTGGTGGGG
ENST00000368297|1|+|156137641|156137686|459|(Target-AID;-;@19;NG;ATG:ATA;M:I;)	ENST00000368297	459	I	GCATGGCCACTTCCTGGTGGGG
ENST00000368297|1|+|156137641|156137686|459|(Target-AID;-;@18;NG;ATG:ATA;M:I;)	ENST00000368297	459	I	CGCATGGCCACTTCCTGGTGGG
ENST00000368299|1|+|156137641|156137686|540|(Target-AID;-;@18;NGG;ATG:ATA;M:I;)	ENST00000368299	540	I	CGCATGGCCACTTCCTGGTGGGG
ENST00000368299|1|+|156137641|156137686|540|(Target-AID;-;@19;NG;ATG:ATA;M:I;)	ENST00000368299	540	I	GCATGGCCACTTCCTGGTGGGG
ENST00000368299|1|+|156137641|156137686|540|(Target-AID;-;@18;NG;ATG:ATA;M:I;)	ENST00000368299	540	I	CGCATGGCCACTTCCTGGTGGG
ENST00000368300|1|+|156137641|156137686|540|(Target-AID;-;@18;NGG;ATG:ATA;M:I;)	ENST00000368300	540	I	CGCATGGCCACTTCCTGGTGGGG
ENST00000368300|1|+|156137641|156137686|540|(Target-AID;-;@19;NG;ATG:ATA;M:I;)	ENST00000368300	540	I	GCATGGCCACTTCCTGGTGGGG
ENST00000368300|1|+|156137641|156137686|540|(Target-AID;-;@18;NG;ATG:ATA;M:I;)	ENST00000368300	540	I	CGCATGGCCACTTCCTGGTGGG
ENST00000368301|1|+|156137641|156137686|540|(Target-AID;-;@18;NGG;ATG:ATA;M:I;)	ENST00000368301	540	I	CGCATGGCCACTTCCTGGTGGGG
ENST00000368301|1|+|156137641|156137686|540|(Target-AID;-;@19;NG;ATG:ATA;M:I;)	ENST00000368301	540	I	GCATGGCCACTTCCTGGTGGGG
ENST00000368301|1|+|156137641|156137686|540|(Target-AID;-;@18;NG;ATG:ATA;M:I;)	ENST00000368301	540	I	CGCATGGCCACTTCCTGGTGGG
ENST00000448611|1|+|156137641|156137686|428|(Target-AID;-;@18;NGG;ATG:ATA;M:I;)	ENST00000448611	428	I	CGCATGGCCACTTCCTGGTGGGG
ENST00000448611|1|+|156137641|156137686|428|(Target-AID;-;@19;NG;ATG:ATA;M:I;)	ENST00000448611	428	I	GCATGGCCACTTCCTGGTGGGG
ENST00000448611|1|+|156137641|156137686|428|(Target-AID;-;@18;NG;ATG:ATA;M:I;)	ENST00000448611	428	I	CGCATGGCCACTTCCTGGTGGG
ENST00000473598|1|+|156137641|156137686|441|(Target-AID;-;@18;NGG;ATG:ATA;M:I;)	ENST00000473598	441	I	CGCATGGCCACTTCCTGGTGGGG
ENST00000473598|1|+|156137641|156137686|441|(Target-AID;-;@19;NG;ATG:ATA;M:I;)	ENST00000473598	441	I	GCATGGCCACTTCCTGGTGGGG
ENST00000473598|1|+|156137641|156137686|441|(Target-AID;-;@18;NG;ATG:ATA;M:I;)	ENST00000473598	441	I	CGCATGGCCACTTCCTGGTGGG
ENST00000361308|1|+|156137644|156137689|456|(Target-AID;+;@17;NG;CGC:TGC;R:C;)	ENST00000361308	456	C	ATGCGCAAGCTGGTGCGCTCAG
ENST00000368297|1|+|156137644|156137689|460|(Target-AID;+;@17;NG;CGC:TGC;R:C;)	ENST00000368297	460	C	ATGCGCAAGCTGGTGCGCTCAG
ENST00000368299|1|+|156137644|156137689|541|(Target-AID;+;@17;NG;CGC:TGC;R:C;)	ENST00000368299	541	C	ATGCGCAAGCTGGTGCGCTCAG
ENST00000368300|1|+|156137644|156137689|541|(Target-AID;+;@17;NG;CGC:TGC;R:C;)	ENST00000368300	541	C	ATGCGCAAGCTGGTGCGCTCAG
ENST00000368301|1|+|156137644|156137689|541|(Target-AID;+;@17;NG;CGC:TGC;R:C;)	ENST00000368301	541	C	ATGCGCAAGCTGGTGCGCTCAG
ENST00000448611|1|+|156137644|156137689|429|(Target-AID;+;@17;NG;CGC:TGC;R:C;)	ENST00000448611	429	C	ATGCGCAAGCTGGTGCGCTCAG
ENST00000473598|1|+|156137644|156137689|442|(Target-AID;+;@17;NG;CGC:TGC;R:C;)	ENST00000473598	442	C	ATGCGCAAGCTGGTGCGCTCAG
ENST00000361308|1|+|156137644|156137689|456|(Target-AID;-;@18;NGG;CGC:CAC;R:H;)	ENST00000361308	456	H	TGCGCATGGCCACTTCCTGGTGG
ENST00000361308|1|+|156137644|156137689|456|(Target-AID;-;@18;NG;CGC:CAC;R:H;)	ENST00000361308	456	H	TGCGCATGGCCACTTCCTGGTG
ENST00000368297|1|+|156137644|156137689|460|(Target-AID;-;@18;NGG;CGC:CAC;R:H;)	ENST00000368297	460	H	TGCGCATGGCCACTTCCTGGTGG
ENST00000368297|1|+|156137644|156137689|460|(Target-AID;-;@18;NG;CGC:CAC;R:H;)	ENST00000368297	460	H	TGCGCATGGCCACTTCCTGGTG
ENST00000368299|1|+|156137644|156137689|541|(Target-AID;-;@18;NGG;CGC:CAC;R:H;)	ENST00000368299	541	H	TGCGCATGGCCACTTCCTGGTGG
ENST00000368299|1|+|156137644|156137689|541|(Target-AID;-;@18;NG;CGC:CAC;R:H;)	ENST00000368299	541	H	TGCGCATGGCCACTTCCTGGTG
ENST00000368300|1|+|156137644|156137689|541|(Target-AID;-;@18;NGG;CGC:CAC;R:H;)	ENST00000368300	541	H	TGCGCATGGCCACTTCCTGGTGG
ENST00000368300|1|+|156137644|156137689|541|(Target-AID;-;@18;NG;CGC:CAC;R:H;)	ENST00000368300	541	H	TGCGCATGGCCACTTCCTGGTG
ENST00000368301|1|+|156137644|156137689|541|(Target-AID;-;@18;NGG;CGC:CAC;R:H;)	ENST00000368301	541	H	TGCGCATGGCCACTTCCTGGTGG
ENST00000368301|1|+|156137644|156137689|541|(Target-AID;-;@18;NG;CGC:CAC;R:H;)	ENST00000368301	541	H	TGCGCATGGCCACTTCCTGGTG
ENST00000448611|1|+|156137644|156137689|429|(Target-AID;-;@18;NGG;CGC:CAC;R:H;)	ENST00000448611	429	H	TGCGCATGGCCACTTCCTGGTGG
ENST00000448611|1|+|156137644|156137689|429|(Target-AID;-;@18;NG;CGC:CAC;R:H;)	ENST00000448611	429	H	TGCGCATGGCCACTTCCTGGTG
ENST00000473598|1|+|156137644|156137689|442|(Target-AID;-;@18;NGG;CGC:CAC;R:H;)	ENST00000473598	442	H	TGCGCATGGCCACTTCCTGGTGG
ENST00000473598|1|+|156137644|156137689|442|(Target-AID;-;@18;NG;CGC:CAC;R:H;)	ENST00000473598	442	H	TGCGCATGGCCACTTCCTGGTG
ENST00000361308|1|+|156137656|156137701|460|(Target-AID;-;@17;NG;CGC:CAC;R:H;)	ENST00000361308	460	H	GAGCGCACCAGCTTGCGCATGG
ENST00000368297|1|+|156137656|156137701|464|(Target-AID;-;@17;NG;CGC:CAC;R:H;)	ENST00000368297	464	H	GAGCGCACCAGCTTGCGCATGG
ENST00000368299|1|+|156137656|156137701|545|(Target-AID;-;@17;NG;CGC:CAC;R:H;)	ENST00000368299	545	H	GAGCGCACCAGCTTGCGCATGG
ENST00000368300|1|+|156137656|156137701|545|(Target-AID;-;@17;NG;CGC:CAC;R:H;)	ENST00000368300	545	H	GAGCGCACCAGCTTGCGCATGG
ENST00000368301|1|+|156137656|156137701|545|(Target-AID;-;@17;NG;CGC:CAC;R:H;)	ENST00000368301	545	H	GAGCGCACCAGCTTGCGCATGG
ENST00000448611|1|+|156137656|156137701|433|(Target-AID;-;@17;NG;CGC:CAC;R:H;)	ENST00000448611	433	H	GAGCGCACCAGCTTGCGCATGG
ENST00000473598|1|+|156137656|156137701|446|(Target-AID;-;@17;NG;CGC:CAC;R:H;)	ENST00000473598	446	H	GAGCGCACCAGCTTGCGCATGG
ENST00000361308|1|+|156137677|156137722|467|(Target-AID;+;@18;NG;GAC:GAT;D:D;)	ENST00000361308	467	D	GACGACGAGGATGAGGATGGAG
ENST00000368297|1|+|156137677|156137722|471|(Target-AID;+;@18;NG;GAC:GAT;D:D;)	ENST00000368297	471	D	GACGACGAGGATGAGGATGGAG
ENST00000368299|1|+|156137677|156137722|552|(Target-AID;+;@18;NG;GAC:GAT;D:D;)	ENST00000368299	552	D	GACGACGAGGATGAGGATGGAG
ENST00000368300|1|+|156137677|156137722|552|(Target-AID;+;@18;NG;GAC:GAT;D:D;)	ENST00000368300	552	D	GACGACGAGGATGAGGATGGAG
ENST00000368301|1|+|156137677|156137722|552|(Target-AID;+;@18;NG;GAC:GAT;D:D;)	ENST00000368301	552	D	GACGACGAGGATGAGGATGGAG
ENST00000448611|1|+|156137677|156137722|440|(Target-AID;+;@18;NG;GAC:GAT;D:D;)	ENST00000448611	440	D	GACGACGAGGATGAGGATGGAG
ENST00000473598|1|+|156137677|156137722|453|(Target-AID;+;@18;NG;GAC:GAT;D:D;)	ENST00000473598	453	D	GACGACGAGGATGAGGATGGAG
ENST00000361308|1|+|156137719|156137764|481|(Target-AID;+;@19;NG;CAC:CAT;H:H;)	ENST00000361308	481	H	ACGTGAGTGGTAGCCGCCGCTG
ENST00000368297|1|+|156137719|156137764|485|(Target-AID;+;@19;NG;CAC:CAT;H:H;)	ENST00000368297	485	H	ACGTGAGTGGTAGCCGCCGCTG
ENST00000368299|1|+|156137719|156137764|566|(Target-AID;+;@19;NG;CAC:CAT;H:H;)	ENST00000368299	566	H	ACGTGAGTGGTAGCCGCCGCTG
ENST00000368300|1|+|156137719|156137764|566|(Target-AID;+;@19;NG;CAC:CAT;H:H;)	ENST00000368300	566	H	ACGTGAGTGGTAGCCGCCGCTG
ENST00000368301|1|+|156137719|156137764|566|(Target-AID;+;@19;NG;CAC:CAT;H:H;)	ENST00000368301	566	H	ACGTGAGTGGTAGCCGCCGCTG
ENST00000448611|1|+|156137719|156137764|454|(Target-AID;+;@19;NG;CAC:CAT;H:H;)	ENST00000448611	454	H	ACGTGAGTGGTAGCCGCCGCTG
ENST00000473598|1|+|156137719|156137764|467|(Target-AID;+;@19;NG;CAC:CAT;H:H;)	ENST00000473598	467	H	ACGTGAGTGGTAGCCGCCGCTG
ENST00000347559|1|+|156138511|156138556|552|(Target-AID;-;@18;NGG;CGC:CAC;R:H;)	ENST00000347559	552	H	AGCGCAGGTTGTACTCAGCGGGG
ENST00000347559|1|+|156138511|156138556|552|(Target-AID;-;@17;NGG;CGC:CAC;R:H;)	ENST00000347559	552	H	GAGCGCAGGTTGTACTCAGCGGG
ENST00000347559|1|+|156138511|156138556|552|(Target-AID;-;@18;NG;CGC:CAC;R:H;)	ENST00000347559	552	H	AGCGCAGGTTGTACTCAGCGGG
ENST00000347559|1|+|156138511|156138556|552|(Target-AID;-;@17;NG;CGC:CAC;R:H;)	ENST00000347559	552	H	GAGCGCAGGTTGTACTCAGCGG
ENST00000368299|1|+|156138511|156138556|582|(Target-AID;-;@18;NGG;CGC:CAC;R:H;)	ENST00000368299	582	H	AGCGCAGGTTGTACTCAGCGGGG
ENST00000368299|1|+|156138511|156138556|582|(Target-AID;-;@17;NGG;CGC:CAC;R:H;)	ENST00000368299	582	H	GAGCGCAGGTTGTACTCAGCGGG
ENST00000368299|1|+|156138511|156138556|582|(Target-AID;-;@18;NG;CGC:CAC;R:H;)	ENST00000368299	582	H	AGCGCAGGTTGTACTCAGCGGG
ENST00000368299|1|+|156138511|156138556|582|(Target-AID;-;@17;NG;CGC:CAC;R:H;)	ENST00000368299	582	H	GAGCGCAGGTTGTACTCAGCGG
ENST00000368300|1|+|156138511|156138556|582|(Target-AID;-;@18;NGG;CGC:CAC;R:H;)	ENST00000368300	582	H	AGCGCAGGTTGTACTCAGCGGGG
ENST00000368300|1|+|156138511|156138556|582|(Target-AID;-;@17;NGG;CGC:CAC;R:H;)	ENST00000368300	582	H	GAGCGCAGGTTGTACTCAGCGGG
ENST00000368300|1|+|156138511|156138556|582|(Target-AID;-;@18;NG;CGC:CAC;R:H;)	ENST00000368300	582	H	AGCGCAGGTTGTACTCAGCGGG
ENST00000368300|1|+|156138511|156138556|582|(Target-AID;-;@17;NG;CGC:CAC;R:H;)	ENST00000368300	582	H	GAGCGCAGGTTGTACTCAGCGG
ENST00000448611|1|+|156138511|156138556|470|(Target-AID;-;@18;NGG;CGC:CAC;R:H;)	ENST00000448611	470	H	AGCGCAGGTTGTACTCAGCGGGG
ENST00000448611|1|+|156138511|156138556|470|(Target-AID;-;@17;NGG;CGC:CAC;R:H;)	ENST00000448611	470	H	GAGCGCAGGTTGTACTCAGCGGG
ENST00000448611|1|+|156138511|156138556|470|(Target-AID;-;@18;NG;CGC:CAC;R:H;)	ENST00000448611	470	H	AGCGCAGGTTGTACTCAGCGGG
ENST00000448611|1|+|156138511|156138556|470|(Target-AID;-;@17;NG;CGC:CAC;R:H;)	ENST00000448611	470	H	GAGCGCAGGTTGTACTCAGCGG
ENST00000473598|1|+|156138511|156138556|483|(Target-AID;-;@18;NGG;CGC:CAC;R:H;)	ENST00000473598	483	H	AGCGCAGGTTGTACTCAGCGGGG
ENST00000473598|1|+|156138511|156138556|483|(Target-AID;-;@17;NGG;CGC:CAC;R:H;)	ENST00000473598	483	H	GAGCGCAGGTTGTACTCAGCGGG
ENST00000473598|1|+|156138511|156138556|483|(Target-AID;-;@18;NG;CGC:CAC;R:H;)	ENST00000473598	483	H	AGCGCAGGTTGTACTCAGCGGG
ENST00000473598|1|+|156138511|156138556|483|(Target-AID;-;@17;NG;CGC:CAC;R:H;)	ENST00000473598	483	H	GAGCGCAGGTTGTACTCAGCGG
ENST00000347559|1|+|156138526|156138571|557|(Target-AID;-;@19;NGG;CTG:CTA;L:L;)	ENST00000347559	557	L	ACAGCACGGTGCGCGAGCGCAGG
ENST00000347559|1|+|156138526|156138571|557|(Target-AID;-;@19;NG;CTG:CTA;L:L;)	ENST00000347559	557	L	ACAGCACGGTGCGCGAGCGCAG
ENST00000347559|1|+|156138526|156138571|557|(Target-AID;+;@19;NG;CTG:TTG;L:L;)	ENST00000347559	557	L	GCTGTGCGGGACCTGCGGGCAG
ENST00000368299|1|+|156138526|156138571|587|(Target-AID;-;@19;NGG;CTG:CTA;L:L;)	ENST00000368299	587	L	ACAGCACGGTGCGCGAGCGCAGG
ENST00000368299|1|+|156138526|156138571|587|(Target-AID;-;@19;NG;CTG:CTA;L:L;)	ENST00000368299	587	L	ACAGCACGGTGCGCGAGCGCAG
ENST00000368299|1|+|156138526|156138571|587|(Target-AID;+;@19;NG;CTG:TTG;L:L;)	ENST00000368299	587	L	GCTGTGCGGGACCTGCGGGCAG
ENST00000368300|1|+|156138526|156138571|587|(Target-AID;-;@19;NGG;CTG:CTA;L:L;)	ENST00000368300	587	L	ACAGCACGGTGCGCGAGCGCAGG
ENST00000368300|1|+|156138526|156138571|587|(Target-AID;-;@19;NG;CTG:CTA;L:L;)	ENST00000368300	587	L	ACAGCACGGTGCGCGAGCGCAG
ENST00000368300|1|+|156138526|156138571|587|(Target-AID;+;@19;NG;CTG:TTG;L:L;)	ENST00000368300	587	L	GCTGTGCGGGACCTGCGGGCAG
ENST00000448611|1|+|156138526|156138571|475|(Target-AID;-;@19;NGG;CTG:CTA;L:L;)	ENST00000448611	475	L	ACAGCACGGTGCGCGAGCGCAGG
ENST00000448611|1|+|156138526|156138571|475|(Target-AID;-;@19;NG;CTG:CTA;L:L;)	ENST00000448611	475	L	ACAGCACGGTGCGCGAGCGCAG
ENST00000448611|1|+|156138526|156138571|475|(Target-AID;+;@19;NG;CTG:TTG;L:L;)	ENST00000448611	475	L	GCTGTGCGGGACCTGCGGGCAG
ENST00000473598|1|+|156138526|156138571|488|(Target-AID;-;@19;NGG;CTG:CTA;L:L;)	ENST00000473598	488	L	ACAGCACGGTGCGCGAGCGCAGG
ENST00000473598|1|+|156138526|156138571|488|(Target-AID;-;@19;NG;CTG:CTA;L:L;)	ENST00000473598	488	L	ACAGCACGGTGCGCGAGCGCAG
ENST00000473598|1|+|156138526|156138571|488|(Target-AID;+;@19;NG;CTG:TTG;L:L;)	ENST00000473598	488	L	GCTGTGCGGGACCTGCGGGCAG
ENST00000347559|1|+|156138538|156138583|561|(Target-AID;+;@17;NG;TGC:TGT;C:C;)	ENST00000347559	561	C	CTGCGGGCAGCCTGCCGACAAG
ENST00000347559|1|+|156138538|156138583|561|(Target-AID;+;@18;NG;TGC:TGT;C:C;)	ENST00000347559	561	C	TGCGGGCAGCCTGCCGACAAGG
ENST00000347559|1|+|156138538|156138583|561|(Target-AID;+;@17;NGG;TGC:TGT;C:C;)	ENST00000347559	561	C	CTGCGGGCAGCCTGCCGACAAGG
ENST00000368299|1|+|156138538|156138583|591|(Target-AID;+;@17;NG;TGC:TGT;C:C;)	ENST00000368299	591	C	CTGCGGGCAGCCTGCCGACAAG
ENST00000368299|1|+|156138538|156138583|591|(Target-AID;+;@18;NG;TGC:TGT;C:C;)	ENST00000368299	591	C	TGCGGGCAGCCTGCCGACAAGG
ENST00000368299|1|+|156138538|156138583|591|(Target-AID;+;@17;NGG;TGC:TGT;C:C;)	ENST00000368299	591	C	CTGCGGGCAGCCTGCCGACAAGG
ENST00000368300|1|+|156138538|156138583|591|(Target-AID;+;@17;NG;TGC:TGT;C:C;)	ENST00000368300	591	C	CTGCGGGCAGCCTGCCGACAAG
ENST00000368300|1|+|156138538|156138583|591|(Target-AID;+;@18;NG;TGC:TGT;C:C;)	ENST00000368300	591	C	TGCGGGCAGCCTGCCGACAAGG
ENST00000368300|1|+|156138538|156138583|591|(Target-AID;+;@17;NGG;TGC:TGT;C:C;)	ENST00000368300	591	C	CTGCGGGCAGCCTGCCGACAAGG
ENST00000448611|1|+|156138538|156138583|479|(Target-AID;+;@17;NG;TGC:TGT;C:C;)	ENST00000448611	479	C	CTGCGGGCAGCCTGCCGACAAG
ENST00000448611|1|+|156138538|156138583|479|(Target-AID;+;@18;NG;TGC:TGT;C:C;)	ENST00000448611	479	C	TGCGGGCAGCCTGCCGACAAGG
ENST00000448611|1|+|156138538|156138583|479|(Target-AID;+;@17;NGG;TGC:TGT;C:C;)	ENST00000448611	479	C	CTGCGGGCAGCCTGCCGACAAGG
ENST00000473598|1|+|156138538|156138583|492|(Target-AID;+;@17;NG;TGC:TGT;C:C;)	ENST00000473598	492	C	CTGCGGGCAGCCTGCCGACAAG
ENST00000473598|1|+|156138538|156138583|492|(Target-AID;+;@18;NG;TGC:TGT;C:C;)	ENST00000473598	492	C	TGCGGGCAGCCTGCCGACAAGG
ENST00000473598|1|+|156138538|156138583|492|(Target-AID;+;@17;NGG;TGC:TGT;C:C;)	ENST00000473598	492	C	CTGCGGGCAGCCTGCCGACAAGG
ENST00000355014|1|+|156154638|156154683|28|(Target-AID;-;@19;NG;ACG:ACA;T:T;)	ENST00000355014	28	T	TCGTCGGCAGCAGCAGCTGAAG
ENST00000368282|1|+|156154638|156154683|28|(Target-AID;-;@19;NG;ACG:ACA;T:T;)	ENST00000368282	28	T	TCGTCGGCAGCAGCAGCTGAAG
ENST00000368285|1|+|156154638|156154683|28|(Target-AID;-;@19;NG;ACG:ACA;T:T;)	ENST00000368285	28	T	TCGTCGGCAGCAGCAGCTGAAG
ENST00000355014|1|+|156175157|156175202|510|(Target-AID;+;@19;NG;CGG:TGG;R:W;)	ENST00000355014	510	W	CCGGGACCCCCACTGTGCCTGG
ENST00000355014|1|+|156175157|156175202|510|(Target-AID;+;@19;NGG;CGG:TGG;R:W;)	ENST00000355014	510	W	CCGGGACCCCCACTGTGCCTGGG
ENST00000368282|1|+|156175157|156175202|510|(Target-AID;+;@19;NG;CGG:TGG;R:W;)	ENST00000368282	510	W	CCGGGACCCCCACTGTGCCTGG
ENST00000368282|1|+|156175157|156175202|510|(Target-AID;+;@19;NGG;CGG:TGG;R:W;)	ENST00000368282	510	W	CCGGGACCCCCACTGTGCCTGGG
ENST00000368284|1|+|156175157|156175202|378|(Target-AID;+;@19;NG;CGG:TGG;R:W;)	ENST00000368284	378	W	CCGGGACCCCCACTGTGCCTGG
ENST00000368284|1|+|156175157|156175202|378|(Target-AID;+;@19;NGG;CGG:TGG;R:W;)	ENST00000368284	378	W	CCGGGACCCCCACTGTGCCTGGG
ENST00000368285|1|+|156175157|156175202|510|(Target-AID;+;@19;NG;CGG:TGG;R:W;)	ENST00000368285	510	W	CCGGGACCCCCACTGTGCCTGG
ENST00000368285|1|+|156175157|156175202|510|(Target-AID;+;@19;NGG;CGG:TGG;R:W;)	ENST00000368285	510	W	CCGGGACCCCCACTGTGCCTGGG
ENST00000368286|1|+|156175157|156175202|472|(Target-AID;+;@19;NG;CGG:TGG;R:W;)	ENST00000368286	472	W	CCGGGACCCCCACTGTGCCTGG
ENST00000368286|1|+|156175157|156175202|472|(Target-AID;+;@19;NGG;CGG:TGG;R:W;)	ENST00000368286	472	W	CCGGGACCCCCACTGTGCCTGGG
ENST00000358660|1|+|156860928|156860973|6|(Target-AID;+;@18;NG;CGG:TGG;R:W;)	ENST00000358660	6	W	GACGGCGCGGGCAGCTTGGCTG
ENST00000358660|1|+|156860928|156860973|6|(Target-AID;+;@19;NG;CGG:TGG;R:W;)	ENST00000358660	6	W	ACGGCGCGGGCAGCTTGGCTGG
ENST00000358660|1|+|156860928|156860973|6|(Target-AID;+;@18;NGG;CGG:TGG;R:W;)	ENST00000358660	6	W	GACGGCGCGGGCAGCTTGGCTGG
ENST00000368196|1|+|156860928|156860973|6|(Target-AID;+;@18;NG;CGG:TGG;R:W;)	ENST00000368196	6	W	GACGGCGCGGGCAGCTTGGCTG
ENST00000368196|1|+|156860928|156860973|6|(Target-AID;+;@19;NG;CGG:TGG;R:W;)	ENST00000368196	6	W	ACGGCGCGGGCAGCTTGGCTGG
ENST00000368196|1|+|156860928|156860973|6|(Target-AID;+;@18;NGG;CGG:TGG;R:W;)	ENST00000368196	6	W	GACGGCGCGGGCAGCTTGGCTGG
ENST00000524377|1|+|156860928|156860973|6|(Target-AID;+;@18;NG;CGG:TGG;R:W;)	ENST00000524377	6	W	GACGGCGCGGGCAGCTTGGCTG
ENST00000524377|1|+|156860928|156860973|6|(Target-AID;+;@19;NG;CGG:TGG;R:W;)	ENST00000524377	6	W	ACGGCGCGGGCAGCTTGGCTGG
ENST00000524377|1|+|156860928|156860973|6|(Target-AID;+;@18;NGG;CGG:TGG;R:W;)	ENST00000524377	6	W	GACGGCGCGGGCAGCTTGGCTGG
ENST00000358660|1|+|156860937|156860982|9|(Target-AID;+;@18;NG;CAG:TAG;Q:*;)	ENST00000358660	9	*	GGCAGCTTGGCTGGCACAGCTG
ENST00000358660|1|+|156860937|156860982|9|(Target-AID;+;@19;NG;CAG:TAG;Q:*;)	ENST00000358660	9	*	GCAGCTTGGCTGGCACAGCTGG
ENST00000358660|1|+|156860937|156860982|9|(Target-AID;+;@18;NGG;CAG:TAG;Q:*;)	ENST00000358660	9	*	GGCAGCTTGGCTGGCACAGCTGG
ENST00000358660|1|+|156860937|156860982|9|(Target-AID;+;@19;NGG;CAG:TAG;Q:*;)	ENST00000358660	9	*	GCAGCTTGGCTGGCACAGCTGGG
ENST00000368196|1|+|156860937|156860982|9|(Target-AID;+;@18;NG;CAG:TAG;Q:*;)	ENST00000368196	9	*	GGCAGCTTGGCTGGCACAGCTG
ENST00000368196|1|+|156860937|156860982|9|(Target-AID;+;@19;NG;CAG:TAG;Q:*;)	ENST00000368196	9	*	GCAGCTTGGCTGGCACAGCTGG
ENST00000368196|1|+|156860937|156860982|9|(Target-AID;+;@18;NGG;CAG:TAG;Q:*;)	ENST00000368196	9	*	GGCAGCTTGGCTGGCACAGCTGG
ENST00000368196|1|+|156860937|156860982|9|(Target-AID;+;@19;NGG;CAG:TAG;Q:*;)	ENST00000368196	9	*	GCAGCTTGGCTGGCACAGCTGGG
ENST00000524377|1|+|156860937|156860982|9|(Target-AID;+;@18;NG;CAG:TAG;Q:*;)	ENST00000524377	9	*	GGCAGCTTGGCTGGCACAGCTG
ENST00000524377|1|+|156860937|156860982|9|(Target-AID;+;@19;NG;CAG:TAG;Q:*;)	ENST00000524377	9	*	GCAGCTTGGCTGGCACAGCTGG
ENST00000524377|1|+|156860937|156860982|9|(Target-AID;+;@18;NGG;CAG:TAG;Q:*;)	ENST00000524377	9	*	GGCAGCTTGGCTGGCACAGCTGG
ENST00000524377|1|+|156860937|156860982|9|(Target-AID;+;@19;NGG;CAG:TAG;Q:*;)	ENST00000524377	9	*	GCAGCTTGGCTGGCACAGCTGGG
ENST00000358660|1|+|156864372|156864417|85|(Target-AID;-;@18;NG;CGT:CAT;R:H;)	ENST00000358660	85	H	CACGGAGCTCCAGATGCTGCAG
ENST00000368196|1|+|156864372|156864417|85|(Target-AID;-;@18;NG;CGT:CAT;R:H;)	ENST00000368196	85	H	CACGGAGCTCCAGATGCTGCAG
ENST00000392302|1|+|156864372|156864417|55|(Target-AID;-;@18;NG;CGT:CAT;R:H;)	ENST00000392302	55	H	CACGGAGCTCCAGATGCTGCAG
ENST00000524377|1|+|156864372|156864417|85|(Target-AID;-;@18;NG;CGT:CAT;R:H;)	ENST00000524377	85	H	CACGGAGCTCCAGATGCTGCAG
ENST00000358660|1|+|156868224|156868269|191|(ABE;-;@17;NGG;TGT:CGT;C:R;)	ENST00000358660	191	R	CACAGCTGGCATTGGGCATGTGG
ENST00000358660|1|+|156868224|156868269|191|(ABE;-;@17;NG;TGT:CGT;C:R;)	ENST00000358660	191	R	CACAGCTGGCATTGGGCATGTG
ENST00000368196|1|+|156868224|156868269|191|(ABE;-;@17;NGG;TGT:CGT;C:R;)	ENST00000368196	191	R	CACAGCTGGCATTGGGCATGTGG
ENST00000368196|1|+|156868224|156868269|191|(ABE;-;@17;NG;TGT:CGT;C:R;)	ENST00000368196	191	R	CACAGCTGGCATTGGGCATGTG
ENST00000392302|1|+|156868224|156868269|161|(ABE;-;@17;NGG;TGT:CGT;C:R;)	ENST00000392302	161	R	CACAGCTGGCATTGGGCATGTGG
ENST00000392302|1|+|156868224|156868269|161|(ABE;-;@17;NG;TGT:CGT;C:R;)	ENST00000392302	161	R	CACAGCTGGCATTGGGCATGTG
ENST00000524377|1|+|156868224|156868269|191|(ABE;-;@17;NGG;TGT:CGT;C:R;)	ENST00000524377	191	R	CACAGCTGGCATTGGGCATGTGG
ENST00000524377|1|+|156868224|156868269|191|(ABE;-;@17;NG;TGT:CGT;C:R;)	ENST00000524377	191	R	CACAGCTGGCATTGGGCATGTG
ENST00000358660|1|+|156876471|156876516|573|(Target-AID;+;@19;NG;TTC:TTT;F:F;)	ENST00000358660	573	F	TCGGCGTCTGCACCGAGGGCCG
ENST00000368196|1|+|156876471|156876516|570|(Target-AID;+;@19;NG;TTC:TTT;F:F;)	ENST00000368196	570	F	TCGGCGTCTGCACCGAGGGCCG
ENST00000392302|1|+|156876471|156876516|540|(Target-AID;+;@19;NG;TTC:TTT;F:F;)	ENST00000392302	540	F	TCGGCGTCTGCACCGAGGGCCG
ENST00000524377|1|+|156876471|156876516|576|(Target-AID;+;@19;NG;TTC:TTT;F:F;)	ENST00000524377	576	F	TCGGCGTCTGCACCGAGGGCCG
ENST00000358660|1|+|156876504|156876549|584|(ABE;+;@16;NG;ATG:GTG;M:V;)	ENST00000358660	584	V	GCTCATGGTCTTTGAGTATATG
ENST00000368196|1|+|156876504|156876549|581|(ABE;+;@16;NG;ATG:GTG;M:V;)	ENST00000368196	581	V	GCTCATGGTCTTTGAGTATATG
ENST00000392302|1|+|156876504|156876549|551|(ABE;+;@16;NG;ATG:GTG;M:V;)	ENST00000392302	551	V	GCTCATGGTCTTTGAGTATATG
ENST00000524377|1|+|156876504|156876549|587|(ABE;+;@16;NG;ATG:GTG;M:V;)	ENST00000524377	587	V	GCTCATGGTCTTTGAGTATATG
ENST00000358660|1|+|156879104|156879149|601|(Target-AID;+;@19;NG;CAT:TAT;H:Y;)	ENST00000358660	601	Y	CCATGGACCTGATGCCAAGCTG
ENST00000368196|1|+|156879104|156879149|598|(Target-AID;+;@19;NG;CAT:TAT;H:Y;)	ENST00000368196	598	Y	CCATGGACCTGATGCCAAGCTG
ENST00000392302|1|+|156879104|156879149|568|(Target-AID;+;@19;NG;CAT:TAT;H:Y;)	ENST00000392302	568	Y	CCATGGACCTGATGCCAAGCTG
ENST00000524377|1|+|156879104|156879149|604|(Target-AID;+;@19;NG;CAT:TAT;H:Y;)	ENST00000524377	604	Y	CCATGGACCTGATGCCAAGCTG
ENST00000358660|1|+|156879152|156879197|617|(Target-AID;+;@17;NG;GGC:GGT;G:G;)	ENST00000358660	617	G	AGGCCCCCTGGGTCTGGGGCAG
ENST00000368196|1|+|156879152|156879197|614|(Target-AID;+;@17;NG;GGC:GGT;G:G;)	ENST00000368196	614	G	AGGCCCCCTGGGTCTGGGGCAG
ENST00000392302|1|+|156879152|156879197|584|(Target-AID;+;@17;NG;GGC:GGT;G:G;)	ENST00000392302	584	G	AGGCCCCCTGGGTCTGGGGCAG
ENST00000524377|1|+|156879152|156879197|620|(Target-AID;+;@17;NG;GGC:GGT;G:G;)	ENST00000524377	620	G	AGGCCCCCTGGGTCTGGGGCAG
ENST00000358660|1|+|156879980|156880025|681|(ABE;+;@14;NG;GGA:GGG;G:G;)	ENST00000358660	681	G	GGTGGGAGGCCGCACCATGCTG
ENST00000368196|1|+|156879980|156880025|678|(ABE;+;@14;NG;GGA:GGG;G:G;)	ENST00000368196	678	G	GGTGGGAGGCCGCACCATGCTG
ENST00000392302|1|+|156879980|156880025|648|(ABE;+;@14;NG;GGA:GGG;G:G;)	ENST00000392302	648	G	GGTGGGAGGCCGCACCATGCTG
ENST00000524377|1|+|156879980|156880025|684|(ABE;+;@14;NG;GGA:GGG;G:G;)	ENST00000524377	684	G	GGTGGGAGGCCGCACCATGCTG
ENST00000358660|1|+|156881567|156881612|777|(Target-AID;-;@19;NG;CGG:CAG;R:Q;)	ENST00000358660	777	Q	CCGGGCGTGCACATCCTTGATG
ENST00000368196|1|+|156881567|156881612|774|(Target-AID;-;@19;NG;CGG:CAG;R:Q;)	ENST00000368196	774	Q	CCGGGCGTGCACATCCTTGATG
ENST00000392302|1|+|156881567|156881612|744|(Target-AID;-;@19;NG;CGG:CAG;R:Q;)	ENST00000392302	744	Q	CCGGGCGTGCACATCCTTGATG
ENST00000524377|1|+|156881567|156881612|780|(Target-AID;-;@19;NG;CGG:CAG;R:Q;)	ENST00000524377	780	Q	CCGGGCGTGCACATCCTTGATG
ENST00000361216|1|+|160115846|160115891|3|(Target-AID;-;@18;NG;CGT:CAT;R:H;)	ENST00000361216	3	H	CACGGCCCATCTTGGGGCAGAG
ENST00000392233|1|+|160115846|160115891|3|(Target-AID;-;@18;NG;CGT:CAT;R:H;)	ENST00000392233	3	H	CACGGCCCATCTTGGGGCAGAG
ENST00000361216|1|+|160121179|160121224|43|(Target-AID;-;@19;NGG;AAG:AAA;K:K;)	ENST00000361216	43	K	GCTTGTGGTCATCCTGGGGAAGG
ENST00000361216|1|+|160121179|160121224|43|(Target-AID;-;@19;NG;AAG:AAA;K:K;)	ENST00000361216	43	K	GCTTGTGGTCATCCTGGGGAAG
ENST00000392233|1|+|160121179|160121224|43|(Target-AID;-;@19;NGG;AAG:AAA;K:K;)	ENST00000392233	43	K	GCTTGTGGTCATCCTGGGGAAGG
ENST00000392233|1|+|160121179|160121224|43|(Target-AID;-;@19;NG;AAG:AAA;K:K;)	ENST00000392233	43	K	GCTTGTGGTCATCCTGGGGAAG
ENST00000361216|1|+|160123206|160123251|65|(Target-AID;+;@17;NG;CGG:TGG;R:W;)	ENST00000361216	65	W	CAGCGGGCTCAGGACGTTCTGG
ENST00000392233|1|+|160123206|160123251|65|(Target-AID;+;@17;NG;CGG:TGG;R:W;)	ENST00000392233	65	W	CAGCGGGCTCAGGACGTTCTGG
ENST00000361216|1|+|160124403|160124448|209|(ABE;-;@14;NG;TGT:TGC;C:C;)	ENST00000361216	209	C	CACCTTACAGCCATGAGAAGAG
ENST00000392233|1|+|160124403|160124448|209|(ABE;-;@14;NG;TGT:TGC;C:C;)	ENST00000392233	209	C	CACCTTACAGCCATGAGAAGAG
ENST00000361216|1|+|160127637|160127682|286|(ABE;-;@17;NG;ATT:ACT;I:T;)	ENST00000361216	286	T	TCAATCTCCATTGCTATGGGTG
ENST00000392233|1|+|160127637|160127682|286|(ABE;-;@17;NG;ATT:ACT;I:T;)	ENST00000392233	286	T	TCAATCTCCATTGCTATGGGTG
ENST00000361216|1|+|160128645|160128690|345|(ABE;+;@13;NG;ACA:GCA;T:A;)	ENST00000361216	345	A	GACCCTGACAGCCAAGCGCATG
ENST00000361216|1|+|160128645|160128690|345|(ABE;+;@14;NG;ACA:GCA;T:A;)	ENST00000361216	345	A	ACCCTGACAGCCAAGCGCATGG
ENST00000361216|1|+|160128645|160128690|345|(ABE;+;@13;NGG;ACA:GCA;T:A;)	ENST00000361216	345	A	GACCCTGACAGCCAAGCGCATGG
ENST00000392233|1|+|160128645|160128690|345|(ABE;+;@13;NG;ACA:GCA;T:A;)	ENST00000392233	345	A	GACCCTGACAGCCAAGCGCATG
ENST00000392233|1|+|160128645|160128690|345|(ABE;+;@14;NG;ACA:GCA;T:A;)	ENST00000392233	345	A	ACCCTGACAGCCAAGCGCATGG
ENST00000392233|1|+|160128645|160128690|345|(ABE;+;@13;NGG;ACA:GCA;T:A;)	ENST00000392233	345	A	GACCCTGACAGCCAAGCGCATGG
ENST00000361216|1|+|160128702|160128747|364|(Target-AID;-;@17;NG;ACG:ACA;T:T;)	ENST00000361216	364	T	CAGCGTCTCCACCGCCTCCAGG
ENST00000392233|1|+|160128702|160128747|364|(Target-AID;-;@17;NG;ACG:ACA;T:T;)	ENST00000392233	364	T	CAGCGTCTCCACCGCCTCCAGG
ENST00000361216|1|+|160128984|160129029|415|(Target-AID;+;@17;NG;ACG:ATG;T:M;)	ENST00000361216	415	M	CTACGTGGACGGCCCTGTCTCG
ENST00000392233|1|+|160128984|160129029|415|(Target-AID;+;@17;NG;ACG:ATG;T:M;)	ENST00000392233	415	M	CTACGTGGACGGCCCTGTCTCG
ENST00000361216|1|+|160130092|160130137|492|(Target-AID;-;@19;NG;GAG:AAG;E:K;)	ENST00000361216	492	K	TCGTGGATAGACAGCTGGAGAG
ENST00000392233|1|+|160130092|160130137|492|(Target-AID;-;@19;NG;GAG:AAG;E:K;)	ENST00000392233	492	K	TCGTGGATAGACAGCTGGAGAG
ENST00000361216|1|+|160130260|160130305|548|(Target-AID;-;@18;NG;CGT:CAT;R:H;)	ENST00000361216	548	H	CACGCTCCCCAAGTCCCCCCAG
ENST00000392233|1|+|160130260|160130305|548|(Target-AID;-;@18;NG;CGT:CAT;R:H;)	ENST00000392233	548	H	CACGCTCCCCAAGTCCCCCCAG
ENST00000361216|1|+|160135223|160135268|689|(Target-AID;-;@19;NG;CGA:CAA;R:Q;)	ENST00000361216	689	Q	TCGAGCAAAGACGATCTCTGTG
ENST00000361216|1|+|160135223|160135268|689|(Target-AID;-;@17;NG;CGA:CAA;R:Q;)	ENST00000361216	689	Q	GTTCGAGCAAAGACGATCTCTG
ENST00000392233|1|+|160135223|160135268|689|(Target-AID;-;@19;NG;CGA:CAA;R:Q;)	ENST00000392233	689	Q	TCGAGCAAAGACGATCTCTGTG
ENST00000392233|1|+|160135223|160135268|689|(Target-AID;-;@17;NG;CGA:CAA;R:Q;)	ENST00000392233	689	Q	GTTCGAGCAAAGACGATCTCTG
ENST00000361216|1|+|160135487|160135532|731|(ABE;-;@17;NG;ATG:ACG;M:T;)	ENST00000361216	731	T	CCCATGGCAATGCCAATGTCAG
ENST00000361216|1|+|160135487|160135532|731|(ABE;-;@13;NG;ATG:ACG;M:T;)	ENST00000361216	731	T	GATGCCCATGGCAATGCCAATG
ENST00000392233|1|+|160135487|160135532|731|(ABE;-;@17;NG;ATG:ACG;M:T;)	ENST00000392233	731	T	CCCATGGCAATGCCAATGTCAG
ENST00000392233|1|+|160135487|160135532|731|(ABE;-;@13;NG;ATG:ACG;M:T;)	ENST00000392233	731	T	GATGCCCATGGCAATGCCAATG
ENST00000361216|1|+|160135822|160135867|764|(ABE;-;@15;NG;CTG:CCG;L:P;)	ENST00000361216	764	P	AGATCAGGCGGCCTGTGGGGAG
ENST00000392233|1|+|160135822|160135867|764|(ABE;-;@15;NG;CTG:CCG;L:P;)	ENST00000392233	764	P	AGATCAGGCGGCCTGTGGGGAG
ENST00000361216|1|+|160136285|160136330|834|(Target-AID;+;@19;NG;CGA:TGA;R:*;)	ENST00000361216	834	*	ACGAAACTCCCAGACGGACAAG
ENST00000392233|1|+|160136285|160136330|834|(Target-AID;+;@19;NG;CGA:TGA;R:*;)	ENST00000392233	834	*	ACGAAACTCCCAGACGGACAAG
ENST00000361216|1|+|160136643|160136688|887|(ABE;-;@17;NG;TGG:CGG;W:R;)	ENST00000361216	887	R	CCCAGTCGAGGCGGATTCCCAG
ENST00000392233|1|+|160136643|160136688|887|(ABE;-;@17;NG;TGG:CGG;W:R;)	ENST00000392233	887	R	CCCAGTCGAGGCGGATTCCCAG
ENST00000294785|1|+|160349561|160349606|117|(Target-AID;+;@19;NG;CGA:TGA;R:*;)	ENST00000294785	117	*	CCGAATTGCTGGTCTTGCAGTG
ENST00000352210|1|+|161166859|161166904|12|(ABE;-;@16;NG;ATC:ACC;I:T;)	ENST00000352210	12	T	GCTGATGCCTCCGCCCAGCACG
ENST00000367999|1|+|161166859|161166904|12|(ABE;-;@16;NG;ATC:ACC;I:T;)	ENST00000367999	12	T	GCTGATGCCTCCGCCCAGCACG
ENST00000462866|1|+|161166859|161166904|12|(ABE;-;@16;NG;ATC:ACC;I:T;)	ENST00000462866	12	T	GCTGATGCCTCCGCCCAGCACG
ENST00000535223|1|+|161166859|161166904|12|(ABE;-;@16;NG;ATC:ACC;I:T;)	ENST00000535223	12	T	GCTGATGCCTCCGCCCAGCACG
ENST00000544598|1|+|161166859|161166904|12|(ABE;-;@16;NG;ATC:ACC;I:T;)	ENST00000544598	12	T	GCTGATGCCTCCGCCCAGCACG
ENST00000352210|1|+|161167165|161167210|59|(Target-AID;+;@18;NG;CGG:TGG;R:W;)	ENST00000352210	59	W	CTCGGGGAATTAGGCCAGCGGG
ENST00000367999|1|+|161167165|161167210|59|(Target-AID;+;@18;NG;CGG:TGG;R:W;)	ENST00000367999	59	W	CTCGGGGAATTAGGCCAGCGGG
ENST00000544598|1|+|161167165|161167210|59|(Target-AID;+;@18;NG;CGG:TGG;R:W;)	ENST00000544598	59	W	CTCGGGGAATTAGGCCAGCGGG
ENST00000352210|1|+|161170915|161170960|427|(Target-AID;-;@19;NGG;TGG:TAG;W:*;)	ENST00000352210	427	*	CCAGTGACCTAGTGTATACTGGG
ENST00000352210|1|+|161170915|161170960|427|(Target-AID;-;@19;NG;TGG:TAG;W:*;)	ENST00000352210	427	*	CCAGTGACCTAGTGTATACTGG
ENST00000367999|1|+|161170915|161170960|427|(Target-AID;-;@19;NGG;TGG:TAG;W:*;)	ENST00000367999	427	*	CCAGTGACCTAGTGTATACTGGG
ENST00000367999|1|+|161170915|161170960|427|(Target-AID;-;@19;NG;TGG:TAG;W:*;)	ENST00000367999	427	*	CCAGTGACCTAGTGTATACTGG
ENST00000462866|1|+|161170915|161170960|90|(Target-AID;-;@19;NGG;TGG:TAG;W:*;)	ENST00000462866	90	*	CCAGTGACCTAGTGTATACTGGG
ENST00000462866|1|+|161170915|161170960|90|(Target-AID;-;@19;NG;TGG:TAG;W:*;)	ENST00000462866	90	*	CCAGTGACCTAGTGTATACTGG
ENST00000544598|1|+|161170915|161170960|135|(Target-AID;-;@19;NGG;TGG:TAG;W:*;)	ENST00000544598	135	*	CCAGTGACCTAGTGTATACTGGG
ENST00000544598|1|+|161170915|161170960|135|(Target-AID;-;@19;NG;TGG:TAG;W:*;)	ENST00000544598	135	*	CCAGTGACCTAGTGTATACTGG
ENST00000342751|1|+|161314384|161314429|1|(ABE;+;@16;NG;ATG:GTG;M:V;)	ENST00000342751	1	V	CAAGATGGCTGCGCTGTTGCTG
ENST00000367975|1|+|161314384|161314429|1|(ABE;+;@16;NG;ATG:GTG;M:V;)	ENST00000367975	1	V	CAAGATGGCTGCGCTGTTGCTG
ENST00000392169|1|+|161314384|161314429|1|(ABE;+;@16;NG;ATG:GTG;M:V;)	ENST00000392169	1	V	CAAGATGGCTGCGCTGTTGCTG
ENST00000432287|1|+|161314384|161314429|1|(ABE;+;@16;NG;ATG:GTG;M:V;)	ENST00000432287	1	V	CAAGATGGCTGCGCTGTTGCTG
ENST00000513009|1|+|161314384|161314429|1|(ABE;+;@16;NG;ATG:GTG;M:V;)	ENST00000513009	1	V	CAAGATGGCTGCGCTGTTGCTG
ENST00000342751|1|+|161323614|161323659|15|(Target-AID;+;@19;NG;CGA:TGA;R:*;)	ENST00000342751	15	*	CCGAGCCCACTTTAGCCCTCAG
ENST00000367975|1|+|161323614|161323659|15|(Target-AID;+;@19;NG;CGA:TGA;R:*;)	ENST00000367975	15	*	CCGAGCCCACTTTAGCCCTCAG
ENST00000432287|1|+|161323614|161323659|15|(Target-AID;+;@19;NG;CGA:TGA;R:*;)	ENST00000432287	15	*	CCGAGCCCACTTTAGCCCTCAG
ENST00000513009|1|+|161323614|161323659|15|(Target-AID;+;@19;NG;CGA:TGA;R:*;)	ENST00000513009	15	*	CCGAGCCCACTTTAGCCCTCAG
ENST00000342751|1|+|161328414|161328459|40|(Target-AID;-;@17;NGG;CGG:CGA;R:R;)	ENST00000342751	40	R	GAACCGCTCCATCTCTTCTTTGG
ENST00000342751|1|+|161328414|161328459|40|(Target-AID;-;@17;NG;CGG:CGA;R:R;)	ENST00000342751	40	R	GAACCGCTCCATCTCTTCTTTG
ENST00000367975|1|+|161328414|161328459|40|(Target-AID;-;@17;NGG;CGG:CGA;R:R;)	ENST00000367975	40	R	GAACCGCTCCATCTCTTCTTTGG
ENST00000367975|1|+|161328414|161328459|40|(Target-AID;-;@17;NG;CGG:CGA;R:R;)	ENST00000367975	40	R	GAACCGCTCCATCTCTTCTTTG
ENST00000342751|1|+|161340615|161340660|75|(Target-AID;-;@19;NG;GGT:AGT;G:S;)	ENST00000342751	75	S	CCAGTGCCACGGTGGCAGATGG
ENST00000367975|1|+|161340615|161340660|75|(Target-AID;-;@19;NG;GGT:AGT;G:S;)	ENST00000367975	75	S	CCAGTGCCACGGTGGCAGATGG
ENST00000392169|1|+|161340615|161340660|22|(Target-AID;-;@19;NG;GGT:AGT;G:S;)	ENST00000392169	22	S	CCAGTGCCACGGTGGCAGATGG
ENST00000432287|1|+|161340615|161340660|41|(Target-AID;-;@19;NG;GGT:AGT;G:S;)	ENST00000432287	41	S	CCAGTGCCACGGTGGCAGATGG
ENST00000513009|1|+|161340615|161340660|41|(Target-AID;-;@19;NG;GGT:AGT;G:S;)	ENST00000513009	41	S	CCAGTGCCACGGTGGCAGATGG
ENST00000367975|1|+|161356789|161356834|126|(ABE;+;@14;NG;TAT:TGT;Y:C;)	ENST00000367975	126	C	TCATGTATCATACCTGGAATGG
ENST00000367975|1|+|161356789|161356834|126|(ABE;+;@15;NG;TAT:TGT;Y:C;)	ENST00000367975	126	C	CATGTATCATACCTGGAATGGG
ENST00000367975|1|+|161356789|161356834|126|(ABE;+;@14;NGG;TAT:TGT;Y:C;)	ENST00000367975	126	C	TCATGTATCATACCTGGAATGGG
ENST00000392169|1|+|161356789|161356834|73|(ABE;+;@14;NG;TAT:TGT;Y:C;)	ENST00000392169	73	C	TCATGTATCATACCTGGAATGG
ENST00000392169|1|+|161356789|161356834|73|(ABE;+;@15;NG;TAT:TGT;Y:C;)	ENST00000392169	73	C	CATGTATCATACCTGGAATGGG
ENST00000392169|1|+|161356789|161356834|73|(ABE;+;@14;NGG;TAT:TGT;Y:C;)	ENST00000392169	73	C	TCATGTATCATACCTGGAATGGG
ENST00000432287|1|+|161356789|161356834|92|(ABE;+;@14;NG;TAT:TGT;Y:C;)	ENST00000432287	92	C	TCATGTATCATACCTGGAATGG
ENST00000432287|1|+|161356789|161356834|92|(ABE;+;@15;NG;TAT:TGT;Y:C;)	ENST00000432287	92	C	CATGTATCATACCTGGAATGGG
ENST00000432287|1|+|161356789|161356834|92|(ABE;+;@14;NGG;TAT:TGT;Y:C;)	ENST00000432287	92	C	TCATGTATCATACCTGGAATGGG
ENST00000367975|1|+|161356798|161356843|129|(Target-AID;-;@19;NG;TGG:TAG;W:*;)	ENST00000367975	129	*	CCAGGTATGATACATGAGAGGG
ENST00000392169|1|+|161356798|161356843|76|(Target-AID;-;@19;NG;TGG:TAG;W:*;)	ENST00000392169	76	*	CCAGGTATGATACATGAGAGGG
ENST00000432287|1|+|161356798|161356843|95|(Target-AID;-;@19;NG;TGG:TAG;W:*;)	ENST00000432287	95	*	CCAGGTATGATACATGAGAGGG
ENST00000367921|1|+|162759817|162759862|239|(ABE;-;@16;NGG;CTG:CCG;L:P;)	ENST00000367921	239	P	GTCCAGGCCAGACACACCATCGG
ENST00000367921|1|+|162759817|162759862|239|(ABE;-;@17;NG;CTG:CCG;L:P;)	ENST00000367921	239	P	TCCAGGCCAGACACACCATCGG
ENST00000367921|1|+|162759817|162759862|239|(ABE;-;@16;NG;CTG:CCG;L:P;)	ENST00000367921	239	P	GTCCAGGCCAGACACACCATCG
ENST00000367922|1|+|162759817|162759862|239|(ABE;-;@16;NGG;CTG:CCG;L:P;)	ENST00000367922	239	P	GTCCAGGCCAGACACACCATCGG
ENST00000367922|1|+|162759817|162759862|239|(ABE;-;@17;NG;CTG:CCG;L:P;)	ENST00000367922	239	P	TCCAGGCCAGACACACCATCGG
ENST00000367922|1|+|162759817|162759862|239|(ABE;-;@16;NG;CTG:CCG;L:P;)	ENST00000367922	239	P	GTCCAGGCCAGACACACCATCG
ENST00000367762|1|+|170544819|170544864|245|(Target-AID;-;@18;NGG;GCT:ACT;A:T;)	ENST00000367762	245	T	AGCGTATGAATAGTCTAAGCTGG
ENST00000367762|1|+|170544819|170544864|245|(Target-AID;-;@19;NG;GCT:ACT;A:T;)	ENST00000367762	245	T	GCGTATGAATAGTCTAAGCTGG
ENST00000367762|1|+|170544819|170544864|245|(Target-AID;-;@18;NG;GCT:ACT;A:T;)	ENST00000367762	245	T	AGCGTATGAATAGTCTAAGCTG
ENST00000367763|1|+|170544819|170544864|245|(Target-AID;-;@18;NGG;GCT:ACT;A:T;)	ENST00000367763	245	T	AGCGTATGAATAGTCTAAGCTGG
ENST00000367763|1|+|170544819|170544864|245|(Target-AID;-;@19;NG;GCT:ACT;A:T;)	ENST00000367763	245	T	GCGTATGAATAGTCTAAGCTGG
ENST00000367763|1|+|170544819|170544864|245|(Target-AID;-;@18;NG;GCT:ACT;A:T;)	ENST00000367763	245	T	AGCGTATGAATAGTCTAAGCTG
ENST00000367763|1|+|170552114|170552159|287|(Target-AID;+;@19;NG;CGA:TGA;R:*;)	ENST00000367763	287	*	CCGAAAGGCCAAGAAGTTGGAG
ENST00000367763|1|+|170552114|170552159|287|(Target-AID;+;@19;NGG;CGA:TGA;R:*;)	ENST00000367763	287	*	CCGAAAGGCCAAGAAGTTGGAGG
ENST00000367755|1|+|171103784|171103829|52|(Target-AID;-;@17;NGG;GCT:ACT;A:T;)	ENST00000367755	52	T	TAGCCCTGCCCTCCTCTGCATGG
ENST00000367755|1|+|171103784|171103829|52|(Target-AID;-;@17;NG;GCT:ACT;A:T;)	ENST00000367755	52	T	TAGCCCTGCCCTCCTCTGCATG
ENST00000367755|1|+|171103826|171103871|66|(Target-AID;-;@17;NGG;ATG:ATA;M:I;)	ENST00000367755	66	I	CATCATCTCTTTGGAAGAGTTGG
ENST00000367755|1|+|171103826|171103871|66|(Target-AID;-;@18;NG;ATG:ATA;M:I;)	ENST00000367755	66	I	ATCATCTCTTTGGAAGAGTTGG
ENST00000367755|1|+|171103826|171103871|66|(Target-AID;-;@17;NG;ATG:ATA;M:I;)	ENST00000367755	66	I	CATCATCTCTTTGGAAGAGTTG
ENST00000367755|1|+|171110917|171110962|257|(Target-AID;-;@18;NGG;GTG:ATG;V:M;)	ENST00000367755	257	M	CACGTACAACCAGTCAGAGATGG
ENST00000367755|1|+|171110917|171110962|257|(Target-AID;-;@19;NG;GTG:ATG;V:M;)	ENST00000367755	257	M	ACGTACAACCAGTCAGAGATGG
ENST00000367755|1|+|171110917|171110962|257|(Target-AID;-;@18;NG;GTG:ATG;V:M;)	ENST00000367755	257	M	CACGTACAACCAGTCAGAGATG
ENST00000367755|1|+|171114097|171114142|314|(Target-AID;-;@19;NG;GAG:AAG;E:K;)	ENST00000367755	314	K	TCAAAAATGGCCGAGGTCTCTG
ENST00000367755|1|+|171114316|171114361|387|(Target-AID;-;@19;NGG;CGC:CAC;R:H;)	ENST00000367755	387	H	GCGGGACTGGAGGTCAACTGTGG
ENST00000367755|1|+|171114316|171114361|387|(Target-AID;-;@19;NG;CGC:CAC;R:H;)	ENST00000367755	387	H	GCGGGACTGGAGGTCAACTGTG
ENST00000367755|1|+|171114316|171114361|387|(Target-AID;-;@17;NG;CGC:CAC;R:H;)	ENST00000367755	387	H	CAGCGGGACTGGAGGTCAACTG
ENST00000367755|1|+|171117295|171117340|492|(Target-AID;+;@19;NG;CGG:TGG;R:W;)	ENST00000367755	492	W	CCGGTCGTTGAAACCCATGCAG
ENST00000361951|1|+|173826670|173826715|45|(ABE;+;@15;NG;AGT:GGT;S:G;)	ENST00000361951	45	G	AATTCAGTAGCTTTGTTGTCCG
ENST00000361951|1|+|173826670|173826715|45|(ABE;+;@15;NGG;AGT:GGT;S:G;)	ENST00000361951	45	G	AATTCAGTAGCTTTGTTGTCCGG
ENST00000361951|1|+|173833408|173833453|183|(Target-AID;-;@17;NG;ATG:ATA;M:I;)	ENST00000361951	183	I	CTGCATTTGGAAACTACGCAAG
ENST00000367589|1|+|180803560|180803605|140|(ABE;-;@16;NGG;CTC:CCC;L:P;)	ENST00000367589	140	P	ACTGAGGTAGAACTCACTGAAGG
ENST00000367589|1|+|180803560|180803605|140|(ABE;-;@16;NG;CTC:CCC;L:P;)	ENST00000367589	140	P	ACTGAGGTAGAACTCACTGAAG
ENST00000367590|1|+|180803560|180803605|140|(ABE;-;@16;NGG;CTC:CCC;L:P;)	ENST00000367590	140	P	ACTGAGGTAGAACTCACTGAAGG
ENST00000367590|1|+|180803560|180803605|140|(ABE;-;@16;NG;CTC:CCC;L:P;)	ENST00000367590	140	P	ACTGAGGTAGAACTCACTGAAG
ENST00000367589|1|+|180803575|180803620|145|(ABE;-;@15;NGG;CTG:CCG;L:P;)	ENST00000367589	145	P	TCTGCAGCAGGATTAGACTGAGG
ENST00000367589|1|+|180803575|180803620|145|(ABE;-;@15;NG;CTG:CCG;L:P;)	ENST00000367589	145	P	TCTGCAGCAGGATTAGACTGAG
ENST00000367589|1|+|180803575|180803620|145|(ABE;-;@13;NG;CTG:CCG;L:P;)	ENST00000367589	145	P	GTTCTGCAGCAGGATTAGACTG
ENST00000367590|1|+|180803575|180803620|145|(ABE;-;@15;NGG;CTG:CCG;L:P;)	ENST00000367590	145	P	TCTGCAGCAGGATTAGACTGAGG
ENST00000367590|1|+|180803575|180803620|145|(ABE;-;@15;NG;CTG:CCG;L:P;)	ENST00000367590	145	P	TCTGCAGCAGGATTAGACTGAG
ENST00000367590|1|+|180803575|180803620|145|(ABE;-;@13;NG;CTG:CCG;L:P;)	ENST00000367590	145	P	GTTCTGCAGCAGGATTAGACTG
ENST00000264144|1|+|183215445|183215490|95|(Target-AID;+;@18;NG;CGA:TGA;R:*;)	ENST00000264144	95	*	CTCGATGTGACAACTCCGGACG
ENST00000264144|1|+|183215445|183215490|95|(Target-AID;+;@19;NG;CGA:TGA;R:*;)	ENST00000264144	95	*	TCGATGTGACAACTCCGGACGG
ENST00000264144|1|+|183215445|183215490|95|(Target-AID;+;@18;NGG;CGA:TGA;R:*;)	ENST00000264144	95	*	CTCGATGTGACAACTCCGGACGG
ENST00000493293|1|+|183215445|183215490|95|(Target-AID;+;@18;NG;CGA:TGA;R:*;)	ENST00000493293	95	*	CTCGATGTGACAACTCCGGACG
ENST00000493293|1|+|183215445|183215490|95|(Target-AID;+;@19;NG;CGA:TGA;R:*;)	ENST00000493293	95	*	TCGATGTGACAACTCCGGACGG
ENST00000493293|1|+|183215445|183215490|95|(Target-AID;+;@18;NGG;CGA:TGA;R:*;)	ENST00000493293	95	*	CTCGATGTGACAACTCCGGACGG
ENST00000264144|1|+|183222093|183222138|223|(Target-AID;+;@19;NG;CGA:TGA;R:*;)	ENST00000264144	223	*	ACGAAATGGGTCTCCTGCAAAG
ENST00000493293|1|+|183222093|183222138|223|(Target-AID;+;@19;NG;CGA:TGA;R:*;)	ENST00000493293	223	*	ACGAAATGGGTCTCCTGCAAAG
ENST00000264144|1|+|183222135|183222180|237|(Target-AID;+;@17;NG;CAA:TAA;Q:*;)	ENST00000264144	237	*	CATCAAGATGTGTTTAGCTCAG
ENST00000493293|1|+|183222135|183222180|237|(Target-AID;+;@17;NG;CAA:TAA;Q:*;)	ENST00000493293	237	*	CATCAAGATGTGTTTAGCTCAG
ENST00000264144|1|+|183240153|183240198|1069|(Target-AID;+;@18;NG;ACG:ATG;T:M;)	ENST00000264144	1069	M	CACGAATATGGATGCAGTACAG
ENST00000493293|1|+|183240153|183240198|1069|(Target-AID;+;@18;NG;ACG:ATG;T:M;)	ENST00000493293	1069	M	CACGAATATGGATGCAGTACAG
ENST00000361641|1|+|184072235|184072280|152|(ABE;+;@13;NG;TAT:TGT;Y:C;)	ENST00000361641	152	C	ATAGTCTATTATAAACTTACTG
ENST00000645668|1|+|184072235|184072280|152|(ABE;+;@13;NG;TAT:TGT;Y:C;)	ENST00000645668	152	C	ATAGTCTATTATAAACTTACTG
ENST00000647437|1|+|184072235|184072280|152|(ABE;+;@13;NG;TAT:TGT;Y:C;)	ENST00000647437	152	C	ATAGTCTATTATAAACTTACTG
ENST00000367435|1|+|193122203|193122248|9|(Target-AID;+;@19;NG;CGA:TGA;R:*;)	ENST00000367435	9	*	GCGACAGTACAACATCCAGAAG
ENST00000635846|1|+|193122203|193122248|9|(Target-AID;+;@19;NG;CGA:TGA;R:*;)	ENST00000635846	9	*	GCGACAGTACAACATCCAGAAG
ENST00000367435|1|+|193122209|193122254|11|(Target-AID;+;@17;NG;TAC:TAT;Y:Y;)	ENST00000367435	11	Y	GTACAACATCCAGAAGAAGGAG
ENST00000635846|1|+|193122209|193122254|11|(Target-AID;+;@17;NG;TAC:TAT;Y:Y;)	ENST00000635846	11	Y	GTACAACATCCAGAAGAAGGAG
ENST00000367435|1|+|193135416|193135461|119|(Target-AID;+;@19;NG;CAG:TAG;Q:*;)	ENST00000367435	119	*	TCAGCGATCTACTCAAGGTATG
ENST00000635846|1|+|193135416|193135461|119|(Target-AID;+;@19;NG;CAG:TAG;Q:*;)	ENST00000635846	119	*	TCAGCGATCTACTCAAGGTATG
ENST00000359637|1|+|196675995|196676040|127|(Target-AID;-;@18;NG;CGT:CAT;R:H;)	ENST00000359637	127	H	CACGGTAATTAATCTCACCTAG
ENST00000367429|1|+|196675995|196676040|127|(Target-AID;-;@18;NG;CGT:CAT;R:H;)	ENST00000367429	127	H	CACGGTAATTAATCTCACCTAG
ENST00000630130|1|+|196675995|196676040|127|(Target-AID;-;@18;NG;CGT:CAT;R:H;)	ENST00000630130	127	H	CACGGTAATTAATCTCACCTAG
ENST00000367429|1|+|196677591|196677636|189|(Target-AID;-;@18;NG;GAA:AAA;E:K;)	ENST00000367429	189	K	TTCTTCATCTCCTTCAATCTTG
ENST00000630130|1|+|196677591|196677636|189|(Target-AID;-;@18;NG;GAA:AAA;E:K;)	ENST00000630130	189	K	TTCTTCATCTCCTTCAATCTTG
ENST00000359637|1|+|196690085|196690130|338|(Target-AID;+;@19;NG;CAT:TAT;H:Y;)	ENST00000359637	338	Y	TCATGGAAGAAAGTTTGTACAG
ENST00000359637|1|+|196690085|196690130|338|(Target-AID;+;@19;NGG;CAT:TAT;H:Y;)	ENST00000359637	338	Y	TCATGGAAGAAAGTTTGTACAGG
ENST00000367429|1|+|196690085|196690130|402|(Target-AID;+;@19;NG;CAT:TAT;H:Y;)	ENST00000367429	402	Y	TCATGGAAGAAAGTTTGTACAG
ENST00000367429|1|+|196690085|196690130|402|(Target-AID;+;@19;NGG;CAT:TAT;H:Y;)	ENST00000367429	402	Y	TCATGGAAGAAAGTTTGTACAGG
ENST00000630130|1|+|196690085|196690130|402|(Target-AID;+;@19;NG;CAT:TAT;H:Y;)	ENST00000630130	402	Y	TCATGGAAGAAAGTTTGTACAG
ENST00000630130|1|+|196690085|196690130|402|(Target-AID;+;@19;NGG;CAT:TAT;H:Y;)	ENST00000630130	402	Y	TCATGGAAGAAAGTTTGTACAGG
ENST00000359637|1|+|196690103|196690148|344|(Target-AID;+;@17;NG;CAG:TAG;Q:*;)	ENST00000359637	344	*	GTACAGGGTAAATCTATAGACG
ENST00000367429|1|+|196690103|196690148|408|(Target-AID;+;@17;NG;CAG:TAG;Q:*;)	ENST00000367429	408	*	GTACAGGGTAAATCTATAGACG
ENST00000630130|1|+|196690103|196690148|408|(Target-AID;+;@17;NG;CAG:TAG;Q:*;)	ENST00000630130	408	*	GTACAGGGTAAATCTATAGACG
ENST00000367429|1|+|196715657|196715702|536|(ABE;-;@15;NG;TGC:CGC;C:R;)	ENST00000367429	536	R	ATGGCATTCATAGTCCAATGTG
ENST00000367429|1|+|196715657|196715702|536|(ABE;-;@13;NG;TGC:CGC;C:R;)	ENST00000367429	536	R	TCATGGCATTCATAGTCCAATG
ENST00000367429|1|+|196747166|196747211|1191|(Target-AID;+;@19;NG;TCG:TTG;S:L;)	ENST00000367429	1191	L	TCGAGAACAGGTGAATCAGTTG
ENST00000367399|1|+|197328813|197328858|162|(Target-AID;-;@18;NG;GTG:ATG;V:M;)	ENST00000367399	162	M	CACGGCCCCATTTTGGCAAGGG
ENST00000367400|1|+|197328813|197328858|162|(Target-AID;-;@18;NG;GTG:ATG;V:M;)	ENST00000367400	162	M	CACGGCCCCATTTTGGCAAGGG
ENST00000535699|1|+|197328813|197328858|93|(Target-AID;-;@18;NG;GTG:ATG;V:M;)	ENST00000535699	93	M	CACGGCCCCATTTTGGCAAGGG
ENST00000538660|1|+|197328813|197328858|162|(Target-AID;-;@18;NG;GTG:ATG;V:M;)	ENST00000538660	162	M	CACGGCCCCATTTTGGCAAGGG
ENST00000638467|1|+|197328813|197328858|162|(Target-AID;-;@18;NG;GTG:ATG;V:M;)	ENST00000638467	162	M	CACGGCCCCATTTTGGCAAGGG
ENST00000367399|1|+|197420986|197421031|282|(Target-AID;+;@19;NG;TGC:TGT;C:C;)	ENST00000367399	282	C	GCGAAGAAGACGTCAATGAATG
ENST00000367400|1|+|197420986|197421031|394|(Target-AID;+;@19;NG;TGC:TGT;C:C;)	ENST00000367400	394	C	GCGAAGAAGACGTCAATGAATG
ENST00000535699|1|+|197420986|197421031|325|(Target-AID;+;@19;NG;TGC:TGT;C:C;)	ENST00000535699	325	C	GCGAAGAAGACGTCAATGAATG
ENST00000538660|1|+|197420986|197421031|394|(Target-AID;+;@19;NG;TGC:TGT;C:C;)	ENST00000538660	394	C	GCGAAGAAGACGTCAATGAATG
ENST00000638467|1|+|197420986|197421031|394|(Target-AID;+;@19;NG;TGC:TGT;C:C;)	ENST00000638467	394	C	GCGAAGAAGACGTCAATGAATG
ENST00000367397|1|+|197421718|197421763|19|(Target-AID;+;@19;NG;TCG:TTG;S:L;)	ENST00000367397	19	L	TCGTTTGTAGGCTGTCTCCAAG
ENST00000367399|1|+|197421718|197421763|526|(Target-AID;+;@19;NG;TCG:TTG;S:L;)	ENST00000367399	526	L	TCGTTTGTAGGCTGTCTCCAAG
ENST00000367400|1|+|197421718|197421763|638|(Target-AID;+;@19;NG;TCG:TTG;S:L;)	ENST00000367400	638	L	TCGTTTGTAGGCTGTCTCCAAG
ENST00000535699|1|+|197421718|197421763|569|(Target-AID;+;@19;NG;TCG:TTG;S:L;)	ENST00000535699	569	L	TCGTTTGTAGGCTGTCTCCAAG
ENST00000538660|1|+|197421718|197421763|638|(Target-AID;+;@19;NG;TCG:TTG;S:L;)	ENST00000538660	638	L	TCGTTTGTAGGCTGTCTCCAAG
ENST00000638467|1|+|197421718|197421763|638|(Target-AID;+;@19;NG;TCG:TTG;S:L;)	ENST00000638467	638	L	TCGTTTGTAGGCTGTCTCCAAG
ENST00000367397|1|+|197427524|197427569|122|(ABE;-;@16;NG;ATG:ACG;M:T;)	ENST00000367397	122	T	AAACATGGAGAGGCTGATGGTG
ENST00000367399|1|+|197427524|197427569|629|(ABE;-;@16;NG;ATG:ACG;M:T;)	ENST00000367399	629	T	AAACATGGAGAGGCTGATGGTG
ENST00000367400|1|+|197427524|197427569|741|(ABE;-;@16;NG;ATG:ACG;M:T;)	ENST00000367400	741	T	AAACATGGAGAGGCTGATGGTG
ENST00000535699|1|+|197427524|197427569|672|(ABE;-;@16;NG;ATG:ACG;M:T;)	ENST00000535699	672	T	AAACATGGAGAGGCTGATGGTG
ENST00000638467|1|+|197427524|197427569|741|(ABE;-;@16;NG;ATG:ACG;M:T;)	ENST00000638467	741	T	AAACATGGAGAGGCTGATGGTG
ENST00000367397|1|+|197427857|197427902|233|(ABE;-;@13;NG;ATC:ACC;I:T;)	ENST00000367397	233	T	ATCTTGGATACAGCCTTTGAAG
ENST00000367399|1|+|197427857|197427902|740|(ABE;-;@13;NG;ATC:ACC;I:T;)	ENST00000367399	740	T	ATCTTGGATACAGCCTTTGAAG
ENST00000367400|1|+|197427857|197427902|852|(ABE;-;@13;NG;ATC:ACC;I:T;)	ENST00000367400	852	T	ATCTTGGATACAGCCTTTGAAG
ENST00000535699|1|+|197427857|197427902|783|(ABE;-;@13;NG;ATC:ACC;I:T;)	ENST00000535699	783	T	ATCTTGGATACAGCCTTTGAAG
ENST00000638467|1|+|197427857|197427902|852|(ABE;-;@13;NG;ATC:ACC;I:T;)	ENST00000638467	852	T	ATCTTGGATACAGCCTTTGAAG
ENST00000367397|1|+|197429589|197429634|328|(Target-AID;-;@17;NG;GAA:AAA;E:K;)	ENST00000367397	328	K	ATTCAAATCCTTGAAGCACCGG
ENST00000367399|1|+|197429589|197429634|835|(Target-AID;-;@17;NG;GAA:AAA;E:K;)	ENST00000367399	835	K	ATTCAAATCCTTGAAGCACCGG
ENST00000367400|1|+|197429589|197429634|947|(Target-AID;-;@17;NG;GAA:AAA;E:K;)	ENST00000367400	947	K	ATTCAAATCCTTGAAGCACCGG
ENST00000535699|1|+|197429589|197429634|923|(Target-AID;-;@17;NG;GAA:AAA;E:K;)	ENST00000535699	923	K	ATTCAAATCCTTGAAGCACCGG
ENST00000638467|1|+|197429589|197429634|947|(Target-AID;-;@17;NG;GAA:AAA;E:K;)	ENST00000638467	947	K	ATTCAAATCCTTGAAGCACCGG
ENST00000367397|1|+|197434962|197435007|422|(ABE;-;@16;NG;ATG:ACG;M:T;)	ENST00000367397	422	T	TGTCATGGAAAGGGTCACTTCG
ENST00000367399|1|+|197434962|197435007|929|(ABE;-;@16;NG;ATG:ACG;M:T;)	ENST00000367399	929	T	TGTCATGGAAAGGGTCACTTCG
ENST00000367400|1|+|197434962|197435007|1041|(ABE;-;@16;NG;ATG:ACG;M:T;)	ENST00000367400	1041	T	TGTCATGGAAAGGGTCACTTCG
ENST00000535699|1|+|197434962|197435007|1017|(ABE;-;@16;NG;ATG:ACG;M:T;)	ENST00000535699	1017	T	TGTCATGGAAAGGGTCACTTCG
ENST00000638467|1|+|197434962|197435007|1041|(ABE;-;@16;NG;ATG:ACG;M:T;)	ENST00000638467	1041	T	TGTCATGGAAAGGGTCACTTCG
ENST00000367399|1|+|197442262|197442307|1221|(Target-AID;-;@18;NGG;GAG:AAG;E:K;)	ENST00000367399	1221	K	CTCGCAGCGCTCGCCAGCAAAGG
ENST00000367399|1|+|197442262|197442307|1221|(Target-AID;-;@18;NG;GAG:AAG;E:K;)	ENST00000367399	1221	K	CTCGCAGCGCTCGCCAGCAAAG
ENST00000367400|1|+|197442262|197442307|1333|(Target-AID;-;@18;NGG;GAG:AAG;E:K;)	ENST00000367400	1333	K	CTCGCAGCGCTCGCCAGCAAAGG
ENST00000367400|1|+|197442262|197442307|1333|(Target-AID;-;@18;NG;GAG:AAG;E:K;)	ENST00000367400	1333	K	CTCGCAGCGCTCGCCAGCAAAG
ENST00000535699|1|+|197442262|197442307|1309|(Target-AID;-;@18;NGG;GAG:AAG;E:K;)	ENST00000535699	1309	K	CTCGCAGCGCTCGCCAGCAAAGG
ENST00000535699|1|+|197442262|197442307|1309|(Target-AID;-;@18;NG;GAG:AAG;E:K;)	ENST00000535699	1309	K	CTCGCAGCGCTCGCCAGCAAAG
ENST00000538660|1|+|197442262|197442307|797|(Target-AID;-;@18;NGG;GAG:AAG;E:K;)	ENST00000538660	797	K	CTCGCAGCGCTCGCCAGCAAAGG
ENST00000538660|1|+|197442262|197442307|797|(Target-AID;-;@18;NG;GAG:AAG;E:K;)	ENST00000538660	797	K	CTCGCAGCGCTCGCCAGCAAAG
ENST00000638467|1|+|197442262|197442307|1333|(Target-AID;-;@18;NGG;GAG:AAG;E:K;)	ENST00000638467	1333	K	CTCGCAGCGCTCGCCAGCAAAGG
ENST00000638467|1|+|197442262|197442307|1333|(Target-AID;-;@18;NG;GAG:AAG;E:K;)	ENST00000638467	1333	K	CTCGCAGCGCTCGCCAGCAAAG
ENST00000414487|1|+|203861638|203861683|1|(ABE;+;@16;NG;ATG:GTG;M:V;)	ENST00000414487	1	V	CACCATGGCGTACCGTGGCCAG
ENST00000414487|1|+|203861638|203861683|1|(ABE;+;@17;NG;ATG:GTG;M:V;)	ENST00000414487	1	V	ACCATGGCGTACCGTGGCCAGG
ENST00000414487|1|+|203861638|203861683|1|(ABE;+;@16;NGG;ATG:GTG;M:V;)	ENST00000414487	1	V	CACCATGGCGTACCGTGGCCAGG
ENST00000414487|1|+|203861638|203861683|1|(ABE;+;@17;NGG;ATG:GTG;M:V;)	ENST00000414487	1	V	ACCATGGCGTACCGTGGCCAGGG
ENST00000321556|1|+|20639930|20639975|246|(ABE;+;@13;NG;CGA:CGG;R:R;)	ENST00000321556	246	R	CGAGCCGAGTGGCCTTGGCTGG
ENST00000321556|1|+|20639930|20639975|246|(ABE;+;@14;NG;CGA:CGG;R:R;)	ENST00000321556	246	R	GAGCCGAGTGGCCTTGGCTGGG
ENST00000321556|1|+|20639930|20639975|246|(ABE;+;@15;NG;CGA:CGG;R:R;)	ENST00000321556	246	R	AGCCGAGTGGCCTTGGCTGGGG
ENST00000321556|1|+|20639930|20639975|246|(ABE;+;@17;NG;CGA:CGG;R:R;)	ENST00000321556	246	R	CCGAGTGGCCTTGGCTGGGGAG
ENST00000321556|1|+|20639930|20639975|246|(ABE;+;@13;NGG;CGA:CGG;R:R;)	ENST00000321556	246	R	CGAGCCGAGTGGCCTTGGCTGGG
ENST00000321556|1|+|20639930|20639975|246|(ABE;+;@14;NGG;CGA:CGG;R:R;)	ENST00000321556	246	R	GAGCCGAGTGGCCTTGGCTGGGG
ENST00000321556|1|+|20639930|20639975|246|(Target-AID;+;@19;NG;CGA:TGA;R:*;)	ENST00000321556	246	*	CCGAGTGGCCTTGGCTGGGGAG
ENST00000321556|1|+|20644526|20644571|279|(Target-AID;-;@19;NGG;CGC:CAC;R:H;)	ENST00000321556	279	H	GCGGAGAACCCGGATGATGTTGG
ENST00000321556|1|+|20644526|20644571|279|(Target-AID;-;@19;NG;CGC:CAC;R:H;)	ENST00000321556	279	H	GCGGAGAACCCGGATGATGTTG
ENST00000321556|1|+|20644628|20644673|313|(Target-AID;+;@18;NG;ACG:ATG;T:M;)	ENST00000321556	313	M	GACGCTGTTCCTCGTTATGAAG
ENST00000321556|1|+|20649030|20649075|437|(Target-AID;-;@19;NG;TGG:TAG;W:*;)	ENST00000321556	437	*	CCAGGCATCAGCCTTGCTGTAG
ENST00000321556|1|+|20649195|20649240|492|(Target-AID;+;@18;NG;CGA:TGA;R:*;)	ENST00000321556	492	*	AGCGAGAGGCCAGCAAGGTGAG
ENST00000321556|1|+|20649195|20649240|492|(Target-AID;+;@19;NG;CGA:TGA;R:*;)	ENST00000321556	492	*	GCGAGAGGCCAGCAAGGTGAGG
ENST00000321556|1|+|20649195|20649240|492|(Target-AID;+;@18;NGG;CGA:TGA;R:*;)	ENST00000321556	492	*	AGCGAGAGGCCAGCAAGGTGAGG
ENST00000374832|1|+|21560672|21560717|44|(Target-AID;+;@17;NG;CAG:TAG;Q:*;)	ENST00000374832	44	*	CTTCAGAAGCTCAACACCAACG
ENST00000374832|1|+|21560672|21560717|44|(Target-AID;+;@19;NG;CAG:TAG;Q:*;)	ENST00000374832	44	*	TCAGAAGCTCAACACCAACGTG
ENST00000374832|1|+|21560672|21560717|44|(Target-AID;+;@19;NGG;CAG:TAG;Q:*;)	ENST00000374832	44	*	TCAGAAGCTCAACACCAACGTGG
ENST00000374840|1|+|21560672|21560717|44|(Target-AID;+;@17;NG;CAG:TAG;Q:*;)	ENST00000374840	44	*	CTTCAGAAGCTCAACACCAACG
ENST00000374840|1|+|21560672|21560717|44|(Target-AID;+;@19;NG;CAG:TAG;Q:*;)	ENST00000374840	44	*	TCAGAAGCTCAACACCAACGTG
ENST00000374840|1|+|21560672|21560717|44|(Target-AID;+;@19;NGG;CAG:TAG;Q:*;)	ENST00000374840	44	*	TCAGAAGCTCAACACCAACGTGG
ENST00000539907|1|+|21560670|21560715|5|(Target-AID;+;@17;NG;TTC:TTT;F:F;)	ENST00000539907	5	F	CTTCAGAAGCTCAACACCAACG
ENST00000539907|1|+|21560670|21560715|5|(Target-AID;+;@19;NG;TTC:TTT;F:F;)	ENST00000539907	5	F	TCAGAAGCTCAACACCAACGTG
ENST00000539907|1|+|21560670|21560715|5|(Target-AID;+;@19;NGG;TTC:TTT;F:F;)	ENST00000539907	5	F	TCAGAAGCTCAACACCAACGTGG
ENST00000374832|1|+|21561104|21561149|71|(Target-AID;-;@19;NG;CGC:CAC;R:H;)	ENST00000374832	71	H	GCGGGCAGCCGTCACTGTGGAG
ENST00000374832|1|+|21561104|21561149|71|(Target-AID;-;@17;NG;CGC:CAC;R:H;)	ENST00000374832	71	H	ATGCGGGCAGCCGTCACTGTGG
ENST00000374840|1|+|21561104|21561149|71|(Target-AID;-;@19;NG;CGC:CAC;R:H;)	ENST00000374840	71	H	GCGGGCAGCCGTCACTGTGGAG
ENST00000374840|1|+|21561104|21561149|71|(Target-AID;-;@17;NG;CGC:CAC;R:H;)	ENST00000374840	71	H	ATGCGGGCAGCCGTCACTGTGG
ENST00000540617|1|+|21561104|21561149|16|(Target-AID;-;@19;NG;CGC:CAC;R:H;)	ENST00000540617	16	H	GCGGGCAGCCGTCACTGTGGAG
ENST00000540617|1|+|21561104|21561149|16|(Target-AID;-;@17;NG;CGC:CAC;R:H;)	ENST00000540617	16	H	ATGCGGGCAGCCGTCACTGTGG
ENST00000374832|1|+|21561107|21561152|72|(ABE;-;@17;NG;ATC:ACC;I:T;)	ENST00000374832	72	T	AGGATGCGGGCAGCCGTCACTG
ENST00000374840|1|+|21561107|21561152|72|(ABE;-;@17;NG;ATC:ACC;I:T;)	ENST00000374840	72	T	AGGATGCGGGCAGCCGTCACTG
ENST00000540617|1|+|21561107|21561152|17|(ABE;-;@17;NG;ATC:ACC;I:T;)	ENST00000540617	17	T	AGGATGCGGGCAGCCGTCACTG
ENST00000374832|1|+|21563136|21563181|116|(Target-AID;-;@18;NG;GCC:ACC;A:T;)	ENST00000374832	116	T	GGCGGTGGCGGTGCCGGCACTG
ENST00000374840|1|+|21563136|21563181|116|(Target-AID;-;@18;NG;GCC:ACC;A:T;)	ENST00000374840	116	T	GGCGGTGGCGGTGCCGGCACTG
ENST00000539907|1|+|21563136|21563181|39|(Target-AID;-;@18;NG;GCC:ACC;A:T;)	ENST00000539907	39	T	GGCGGTGGCGGTGCCGGCACTG
ENST00000540617|1|+|21563136|21563181|61|(Target-AID;-;@18;NG;GCC:ACC;A:T;)	ENST00000540617	61	T	GGCGGTGGCGGTGCCGGCACTG
ENST00000374832|1|+|21564081|21564126|179|(Target-AID;-;@18;NGG;GCC:ACC;A:T;)	ENST00000374832	179	T	GGCGTAGGCGGCGCTGGGGGTGG
ENST00000374832|1|+|21564081|21564126|179|(Target-AID;-;@19;NG;GCC:ACC;A:T;)	ENST00000374832	179	T	GCGTAGGCGGCGCTGGGGGTGG
ENST00000374832|1|+|21564081|21564126|179|(Target-AID;-;@18;NG;GCC:ACC;A:T;)	ENST00000374832	179	T	GGCGTAGGCGGCGCTGGGGGTG
ENST00000374840|1|+|21564081|21564126|179|(Target-AID;-;@18;NGG;GCC:ACC;A:T;)	ENST00000374840	179	T	GGCGTAGGCGGCGCTGGGGGTGG
ENST00000374840|1|+|21564081|21564126|179|(Target-AID;-;@19;NG;GCC:ACC;A:T;)	ENST00000374840	179	T	GCGTAGGCGGCGCTGGGGGTGG
ENST00000374840|1|+|21564081|21564126|179|(Target-AID;-;@18;NG;GCC:ACC;A:T;)	ENST00000374840	179	T	GGCGTAGGCGGCGCTGGGGGTG
ENST00000539907|1|+|21564081|21564126|102|(Target-AID;-;@18;NGG;GCC:ACC;A:T;)	ENST00000539907	102	T	GGCGTAGGCGGCGCTGGGGGTGG
ENST00000539907|1|+|21564081|21564126|102|(Target-AID;-;@19;NG;GCC:ACC;A:T;)	ENST00000539907	102	T	GCGTAGGCGGCGCTGGGGGTGG
ENST00000539907|1|+|21564081|21564126|102|(Target-AID;-;@18;NG;GCC:ACC;A:T;)	ENST00000539907	102	T	GGCGTAGGCGGCGCTGGGGGTG
ENST00000540617|1|+|21564081|21564126|124|(Target-AID;-;@18;NGG;GCC:ACC;A:T;)	ENST00000540617	124	T	GGCGTAGGCGGCGCTGGGGGTGG
ENST00000540617|1|+|21564081|21564126|124|(Target-AID;-;@19;NG;GCC:ACC;A:T;)	ENST00000540617	124	T	GCGTAGGCGGCGCTGGGGGTGG
ENST00000540617|1|+|21564081|21564126|124|(Target-AID;-;@18;NG;GCC:ACC;A:T;)	ENST00000540617	124	T	GGCGTAGGCGGCGCTGGGGGTG
ENST00000374832|1|+|21568100|21568145|223|(Target-AID;+;@19;NG;CGG:TGG;R:W;)	ENST00000374832	223	W	CCGGAAATACATGTACCCCAAG
ENST00000374840|1|+|21568100|21568145|223|(Target-AID;+;@19;NG;CGG:TGG;R:W;)	ENST00000374840	223	W	CCGGAAATACATGTACCCCAAG
ENST00000539907|1|+|21568100|21568145|146|(Target-AID;+;@19;NG;CGG:TGG;R:W;)	ENST00000539907	146	W	CCGGAAATACATGTACCCCAAG
ENST00000540617|1|+|21568100|21568145|168|(Target-AID;+;@19;NG;CGG:TGG;R:W;)	ENST00000540617	168	W	CCGGAAATACATGTACCCCAAG
ENST00000374832|1|+|21570298|21570343|270|(Target-AID;-;@19;NGG;TGG:TAG;W:*;)	ENST00000374832	270	*	CCAGATGAAGTGGGAGTGCTAGG
ENST00000374832|1|+|21570298|21570343|270|(Target-AID;-;@19;NG;TGG:TAG;W:*;)	ENST00000374832	270	*	CCAGATGAAGTGGGAGTGCTAG
ENST00000374840|1|+|21570298|21570343|270|(Target-AID;-;@19;NGG;TGG:TAG;W:*;)	ENST00000374840	270	*	CCAGATGAAGTGGGAGTGCTAGG
ENST00000374840|1|+|21570298|21570343|270|(Target-AID;-;@19;NG;TGG:TAG;W:*;)	ENST00000374840	270	*	CCAGATGAAGTGGGAGTGCTAG
ENST00000539907|1|+|21570298|21570343|193|(Target-AID;-;@19;NGG;TGG:TAG;W:*;)	ENST00000539907	193	*	CCAGATGAAGTGGGAGTGCTAGG
ENST00000539907|1|+|21570298|21570343|193|(Target-AID;-;@19;NG;TGG:TAG;W:*;)	ENST00000539907	193	*	CCAGATGAAGTGGGAGTGCTAG
ENST00000540617|1|+|21570298|21570343|215|(Target-AID;-;@19;NGG;TGG:TAG;W:*;)	ENST00000540617	215	*	CCAGATGAAGTGGGAGTGCTAGG
ENST00000540617|1|+|21570298|21570343|215|(Target-AID;-;@19;NG;TGG:TAG;W:*;)	ENST00000540617	215	*	CCAGATGAAGTGGGAGTGCTAG
ENST00000374832|1|+|21573651|21573696|291|(Target-AID;-;@19;NG;GAG:AAG;E:K;)	ENST00000374832	291	K	TCGAAGAGACCTGAGGAGGACG
ENST00000374840|1|+|21573651|21573696|291|(Target-AID;-;@19;NG;GAG:AAG;E:K;)	ENST00000374840	291	K	TCGAAGAGACCTGAGGAGGACG
ENST00000539907|1|+|21573651|21573696|214|(Target-AID;-;@19;NG;GAG:AAG;E:K;)	ENST00000539907	214	K	TCGAAGAGACCTGAGGAGGACG
ENST00000540617|1|+|21573651|21573696|236|(Target-AID;-;@19;NG;GAG:AAG;E:K;)	ENST00000540617	236	K	TCGAAGAGACCTGAGGAGGACG
ENST00000374832|1|+|21573759|21573804|327|(ABE;-;@17;NG;TTC:CTC;F:L;)	ENST00000374832	327	L	AGAAGCCTTTGGGGTTCTTCCG
ENST00000374840|1|+|21573759|21573804|327|(ABE;-;@17;NG;TTC:CTC;F:L;)	ENST00000374840	327	L	AGAAGCCTTTGGGGTTCTTCCG
ENST00000539907|1|+|21573759|21573804|250|(ABE;-;@17;NG;TTC:CTC;F:L;)	ENST00000539907	250	L	AGAAGCCTTTGGGGTTCTTCCG
ENST00000540617|1|+|21573759|21573804|272|(ABE;-;@17;NG;TTC:CTC;F:L;)	ENST00000540617	272	L	AGAAGCCTTTGGGGTTCTTCCG
ENST00000374832|1|+|21575713|21575758|334|(Target-AID;-;@17;NG;GGC:GAC;G:D;)	ENST00000374832	334	D	CTGCCTCCTTGGGACACCAAGG
ENST00000374840|1|+|21575713|21575758|334|(Target-AID;-;@17;NG;GGC:GAC;G:D;)	ENST00000374840	334	D	CTGCCTCCTTGGGACACCAAGG
ENST00000539907|1|+|21575713|21575758|257|(Target-AID;-;@17;NG;GGC:GAC;G:D;)	ENST00000539907	257	D	CTGCCTCCTTGGGACACCAAGG
ENST00000540617|1|+|21575713|21575758|279|(Target-AID;-;@17;NG;GGC:GAC;G:D;)	ENST00000540617	279	D	CTGCCTCCTTGGGACACCAAGG
ENST00000374832|1|+|21575857|21575902|382|(Target-AID;-;@18;NG;GTC:ATC;V:I;)	ENST00000374832	382	I	GACGTGGGAATGGTCCGCAGTG
ENST00000374840|1|+|21575857|21575902|382|(Target-AID;-;@18;NG;GTC:ATC;V:I;)	ENST00000374840	382	I	GACGTGGGAATGGTCCGCAGTG
ENST00000539907|1|+|21575857|21575902|305|(Target-AID;-;@18;NG;GTC:ATC;V:I;)	ENST00000539907	305	I	GACGTGGGAATGGTCCGCAGTG
ENST00000540617|1|+|21575857|21575902|327|(Target-AID;-;@18;NG;GTC:ATC;V:I;)	ENST00000540617	327	I	GACGTGGGAATGGTCCGCAGTG
ENST00000374832|1|+|21577414|21577459|455|(Target-AID;-;@19;NGG;GGC:AGC;G:S;)	ENST00000374832	455	S	CCGTGGGTCTCGTGGCGCAGGGG
ENST00000374832|1|+|21577414|21577459|455|(Target-AID;-;@19;NG;GGC:AGC;G:S;)	ENST00000374832	455	S	CCGTGGGTCTCGTGGCGCAGGG
ENST00000374840|1|+|21577414|21577459|455|(Target-AID;-;@19;NGG;GGC:AGC;G:S;)	ENST00000374840	455	S	CCGTGGGTCTCGTGGCGCAGGGG
ENST00000374840|1|+|21577414|21577459|455|(Target-AID;-;@19;NG;GGC:AGC;G:S;)	ENST00000374840	455	S	CCGTGGGTCTCGTGGCGCAGGG
ENST00000539907|1|+|21577414|21577459|378|(Target-AID;-;@19;NGG;GGC:AGC;G:S;)	ENST00000539907	378	S	CCGTGGGTCTCGTGGCGCAGGGG
ENST00000539907|1|+|21577414|21577459|378|(Target-AID;-;@19;NG;GGC:AGC;G:S;)	ENST00000539907	378	S	CCGTGGGTCTCGTGGCGCAGGG
ENST00000540617|1|+|21577414|21577459|400|(Target-AID;-;@19;NGG;GGC:AGC;G:S;)	ENST00000540617	400	S	CCGTGGGTCTCGTGGCGCAGGGG
ENST00000540617|1|+|21577414|21577459|400|(Target-AID;-;@19;NG;GGC:AGC;G:S;)	ENST00000540617	400	S	CCGTGGGTCTCGTGGCGCAGGG
ENST00000374832|1|+|21577504|21577549|485|(Target-AID;+;@17;NG;GCG:GTG;A:V;)	ENST00000374832	485	V	TGGCGTATGCAGCCTGCATCGG
ENST00000374832|1|+|21577504|21577549|485|(Target-AID;+;@18;NG;GCG:GTG;A:V;)	ENST00000374832	485	V	GGCGTATGCAGCCTGCATCGGG
ENST00000374832|1|+|21577504|21577549|485|(Target-AID;+;@19;NG;GCG:GTG;A:V;)	ENST00000374832	485	V	GCGTATGCAGCCTGCATCGGGG
ENST00000374832|1|+|21577504|21577549|485|(Target-AID;+;@17;NGG;GCG:GTG;A:V;)	ENST00000374832	485	V	TGGCGTATGCAGCCTGCATCGGG
ENST00000374832|1|+|21577504|21577549|485|(Target-AID;+;@18;NGG;GCG:GTG;A:V;)	ENST00000374832	485	V	GGCGTATGCAGCCTGCATCGGGG
ENST00000374840|1|+|21577504|21577549|485|(Target-AID;+;@17;NG;GCG:GTG;A:V;)	ENST00000374840	485	V	TGGCGTATGCAGCCTGCATCGG
ENST00000374840|1|+|21577504|21577549|485|(Target-AID;+;@18;NG;GCG:GTG;A:V;)	ENST00000374840	485	V	GGCGTATGCAGCCTGCATCGGG
ENST00000374840|1|+|21577504|21577549|485|(Target-AID;+;@19;NG;GCG:GTG;A:V;)	ENST00000374840	485	V	GCGTATGCAGCCTGCATCGGGG
ENST00000374840|1|+|21577504|21577549|485|(Target-AID;+;@17;NGG;GCG:GTG;A:V;)	ENST00000374840	485	V	TGGCGTATGCAGCCTGCATCGGG
ENST00000374840|1|+|21577504|21577549|485|(Target-AID;+;@18;NGG;GCG:GTG;A:V;)	ENST00000374840	485	V	GGCGTATGCAGCCTGCATCGGGG
ENST00000539907|1|+|21577504|21577549|408|(Target-AID;+;@17;NG;GCG:GTG;A:V;)	ENST00000539907	408	V	TGGCGTATGCAGCCTGCATCGG
ENST00000539907|1|+|21577504|21577549|408|(Target-AID;+;@18;NG;GCG:GTG;A:V;)	ENST00000539907	408	V	GGCGTATGCAGCCTGCATCGGG
ENST00000539907|1|+|21577504|21577549|408|(Target-AID;+;@19;NG;GCG:GTG;A:V;)	ENST00000539907	408	V	GCGTATGCAGCCTGCATCGGGG
ENST00000539907|1|+|21577504|21577549|408|(Target-AID;+;@17;NGG;GCG:GTG;A:V;)	ENST00000539907	408	V	TGGCGTATGCAGCCTGCATCGGG
ENST00000539907|1|+|21577504|21577549|408|(Target-AID;+;@18;NGG;GCG:GTG;A:V;)	ENST00000539907	408	V	GGCGTATGCAGCCTGCATCGGGG
ENST00000540617|1|+|21577504|21577549|430|(Target-AID;+;@17;NG;GCG:GTG;A:V;)	ENST00000540617	430	V	TGGCGTATGCAGCCTGCATCGG
ENST00000540617|1|+|21577504|21577549|430|(Target-AID;+;@18;NG;GCG:GTG;A:V;)	ENST00000540617	430	V	GGCGTATGCAGCCTGCATCGGG
ENST00000540617|1|+|21577504|21577549|430|(Target-AID;+;@19;NG;GCG:GTG;A:V;)	ENST00000540617	430	V	GCGTATGCAGCCTGCATCGGGG
ENST00000540617|1|+|21577504|21577549|430|(Target-AID;+;@17;NGG;GCG:GTG;A:V;)	ENST00000540617	430	V	TGGCGTATGCAGCCTGCATCGGG
ENST00000540617|1|+|21577504|21577549|430|(Target-AID;+;@18;NGG;GCG:GTG;A:V;)	ENST00000540617	430	V	GGCGTATGCAGCCTGCATCGGGG
ENST00000374832|1|+|21577615|21577660|522|(ABE;-;@16;NGG;GTC:GCC;V:A;)	ENST00000374832	522	A	CAGGACGCTCAGGGGGTAGAGGG
ENST00000374832|1|+|21577615|21577660|522|(ABE;-;@15;NGG;GTC:GCC;V:A;)	ENST00000374832	522	A	ACAGGACGCTCAGGGGGTAGAGG
ENST00000374832|1|+|21577615|21577660|522|(ABE;-;@17;NG;GTC:GCC;V:A;)	ENST00000374832	522	A	AGGACGCTCAGGGGGTAGAGGG
ENST00000374832|1|+|21577615|21577660|522|(ABE;-;@16;NG;GTC:GCC;V:A;)	ENST00000374832	522	A	CAGGACGCTCAGGGGGTAGAGG
ENST00000374832|1|+|21577615|21577660|522|(ABE;-;@15;NG;GTC:GCC;V:A;)	ENST00000374832	522	A	ACAGGACGCTCAGGGGGTAGAG
ENST00000374840|1|+|21577615|21577660|522|(ABE;-;@16;NGG;GTC:GCC;V:A;)	ENST00000374840	522	A	CAGGACGCTCAGGGGGTAGAGGG
ENST00000374840|1|+|21577615|21577660|522|(ABE;-;@15;NGG;GTC:GCC;V:A;)	ENST00000374840	522	A	ACAGGACGCTCAGGGGGTAGAGG
ENST00000374840|1|+|21577615|21577660|522|(ABE;-;@17;NG;GTC:GCC;V:A;)	ENST00000374840	522	A	AGGACGCTCAGGGGGTAGAGGG
ENST00000374840|1|+|21577615|21577660|522|(ABE;-;@16;NG;GTC:GCC;V:A;)	ENST00000374840	522	A	CAGGACGCTCAGGGGGTAGAGG
ENST00000374840|1|+|21577615|21577660|522|(ABE;-;@15;NG;GTC:GCC;V:A;)	ENST00000374840	522	A	ACAGGACGCTCAGGGGGTAGAG
ENST00000539907|1|+|21577615|21577660|445|(ABE;-;@16;NGG;GTC:GCC;V:A;)	ENST00000539907	445	A	CAGGACGCTCAGGGGGTAGAGGG
ENST00000539907|1|+|21577615|21577660|445|(ABE;-;@15;NGG;GTC:GCC;V:A;)	ENST00000539907	445	A	ACAGGACGCTCAGGGGGTAGAGG
ENST00000539907|1|+|21577615|21577660|445|(ABE;-;@17;NG;GTC:GCC;V:A;)	ENST00000539907	445	A	AGGACGCTCAGGGGGTAGAGGG
ENST00000539907|1|+|21577615|21577660|445|(ABE;-;@16;NG;GTC:GCC;V:A;)	ENST00000539907	445	A	CAGGACGCTCAGGGGGTAGAGG
ENST00000539907|1|+|21577615|21577660|445|(ABE;-;@15;NG;GTC:GCC;V:A;)	ENST00000539907	445	A	ACAGGACGCTCAGGGGGTAGAG
ENST00000540617|1|+|21577615|21577660|467|(ABE;-;@16;NGG;GTC:GCC;V:A;)	ENST00000540617	467	A	CAGGACGCTCAGGGGGTAGAGGG
ENST00000540617|1|+|21577615|21577660|467|(ABE;-;@15;NGG;GTC:GCC;V:A;)	ENST00000540617	467	A	ACAGGACGCTCAGGGGGTAGAGG
ENST00000540617|1|+|21577615|21577660|467|(ABE;-;@17;NG;GTC:GCC;V:A;)	ENST00000540617	467	A	AGGACGCTCAGGGGGTAGAGGG
ENST00000540617|1|+|21577615|21577660|467|(ABE;-;@16;NG;GTC:GCC;V:A;)	ENST00000540617	467	A	CAGGACGCTCAGGGGGTAGAGG
ENST00000540617|1|+|21577615|21577660|467|(ABE;-;@15;NG;GTC:GCC;V:A;)	ENST00000540617	467	A	ACAGGACGCTCAGGGGGTAGAG
ENST00000315554|1|+|22086428|22086473|64|(ABE;+;@15;NG;TAT:TGT;Y:C;)	ENST00000315554	64	C	GGATTATGACAGATTACGACCG
ENST00000344548|1|+|22086428|22086473|64|(ABE;+;@15;NG;TAT:TGT;Y:C;)	ENST00000344548	64	C	GGATTATGACAGATTACGACCG
ENST00000400259|1|+|22086428|22086473|64|(ABE;+;@15;NG;TAT:TGT;Y:C;)	ENST00000400259	64	C	GGATTATGACAGATTACGACCG
ENST00000374642|1|+|22639269|22639314|208|(Target-AID;+;@19;NG;CAG:TAG;Q:*;)	ENST00000374642	208	*	TCAGCTGCAGCAGGGTGACCAG
ENST00000374642|1|+|22639269|22639314|208|(Target-AID;+;@19;NGG;CAG:TAG;Q:*;)	ENST00000374642	208	*	TCAGCTGCAGCAGGGTGACCAGG
ENST00000402322|1|+|22639269|22639314|208|(Target-AID;+;@19;NG;CAG:TAG;Q:*;)	ENST00000402322	208	*	TCAGCTGCAGCAGGGTGACCAG
ENST00000402322|1|+|22639269|22639314|208|(Target-AID;+;@19;NGG;CAG:TAG;Q:*;)	ENST00000402322	208	*	TCAGCTGCAGCAGGGTGACCAGG
ENST00000374637|1|+|22647228|22647273|69|(Target-AID;+;@19;NG;CGA:TGA;R:*;)	ENST00000374637	69	*	CCGAGGACCCAAAGGGCAGAAG
ENST00000374637|1|+|22647228|22647273|69|(Target-AID;+;@19;NGG;CGA:TGA;R:*;)	ENST00000374637	69	*	CCGAGGACCCAAAGGGCAGAAGG
ENST00000374639|1|+|22647228|22647273|69|(Target-AID;+;@19;NG;CGA:TGA;R:*;)	ENST00000374639	69	*	CCGAGGACCCAAAGGGCAGAAG
ENST00000374639|1|+|22647228|22647273|69|(Target-AID;+;@19;NGG;CGA:TGA;R:*;)	ENST00000374639	69	*	CCGAGGACCCAAAGGGCAGAAGG
ENST00000374640|1|+|22647228|22647273|69|(Target-AID;+;@19;NG;CGA:TGA;R:*;)	ENST00000374640	69	*	CCGAGGACCCAAAGGGCAGAAG
ENST00000374640|1|+|22647228|22647273|69|(Target-AID;+;@19;NGG;CGA:TGA;R:*;)	ENST00000374640	69	*	CCGAGGACCCAAAGGGCAGAAGG
ENST00000374627|1|+|22906831|22906876|673|(Target-AID;-;@18;NGG;GAC:AAC;D:N;)	ENST00000374627	673	N	GTCGAACTGGCCCATGATGGAGG
ENST00000374627|1|+|22906831|22906876|673|(Target-AID;-;@19;NG;GAC:AAC;D:N;)	ENST00000374627	673	N	TCGAACTGGCCCATGATGGAGG
ENST00000374627|1|+|22906831|22906876|673|(Target-AID;-;@18;NG;GAC:AAC;D:N;)	ENST00000374627	673	N	GTCGAACTGGCCCATGATGGAG
ENST00000374630|1|+|22906831|22906876|678|(Target-AID;-;@18;NGG;GAC:AAC;D:N;)	ENST00000374630	678	N	GTCGAACTGGCCCATGATGGAGG
ENST00000374630|1|+|22906831|22906876|678|(Target-AID;-;@19;NG;GAC:AAC;D:N;)	ENST00000374630	678	N	TCGAACTGGCCCATGATGGAGG
ENST00000374630|1|+|22906831|22906876|678|(Target-AID;-;@18;NG;GAC:AAC;D:N;)	ENST00000374630	678	N	GTCGAACTGGCCCATGATGGAG
ENST00000374632|1|+|22906831|22906876|679|(Target-AID;-;@18;NGG;GAC:AAC;D:N;)	ENST00000374632	679	N	GTCGAACTGGCCCATGATGGAGG
ENST00000374632|1|+|22906831|22906876|679|(Target-AID;-;@19;NG;GAC:AAC;D:N;)	ENST00000374632	679	N	TCGAACTGGCCCATGATGGAGG
ENST00000374632|1|+|22906831|22906876|679|(Target-AID;-;@18;NG;GAC:AAC;D:N;)	ENST00000374632	679	N	GTCGAACTGGCCCATGATGGAG
ENST00000400191|1|+|22906831|22906876|678|(Target-AID;-;@18;NGG;GAC:AAC;D:N;)	ENST00000400191	678	N	GTCGAACTGGCCCATGATGGAGG
ENST00000400191|1|+|22906831|22906876|678|(Target-AID;-;@19;NG;GAC:AAC;D:N;)	ENST00000400191	678	N	TCGAACTGGCCCATGATGGAGG
ENST00000400191|1|+|22906831|22906876|678|(Target-AID;-;@18;NG;GAC:AAC;D:N;)	ENST00000400191	678	N	GTCGAACTGGCCCATGATGGAG
ENST00000374627|1|+|22907958|22908003|717|(Target-AID;+;@19;NG;CAG:TAG;Q:*;)	ENST00000374627	717	*	CCAGCTGGTGGGCATGCTTCGG
ENST00000374627|1|+|22907958|22908003|717|(Target-AID;+;@19;NGG;CAG:TAG;Q:*;)	ENST00000374627	717	*	CCAGCTGGTGGGCATGCTTCGGG
ENST00000374630|1|+|22907958|22908003|722|(Target-AID;+;@19;NG;CAG:TAG;Q:*;)	ENST00000374630	722	*	CCAGCTGGTGGGCATGCTTCGG
ENST00000374630|1|+|22907958|22908003|722|(Target-AID;+;@19;NGG;CAG:TAG;Q:*;)	ENST00000374630	722	*	CCAGCTGGTGGGCATGCTTCGGG
ENST00000374632|1|+|22907958|22908003|723|(Target-AID;+;@19;NG;CAG:TAG;Q:*;)	ENST00000374632	723	*	CCAGCTGGTGGGCATGCTTCGG
ENST00000374632|1|+|22907958|22908003|723|(Target-AID;+;@19;NGG;CAG:TAG;Q:*;)	ENST00000374632	723	*	CCAGCTGGTGGGCATGCTTCGGG
ENST00000400191|1|+|22907958|22908003|722|(Target-AID;+;@19;NG;CAG:TAG;Q:*;)	ENST00000400191	722	*	CCAGCTGGTGGGCATGCTTCGG
ENST00000400191|1|+|22907958|22908003|722|(Target-AID;+;@19;NGG;CAG:TAG;Q:*;)	ENST00000400191	722	*	CCAGCTGGTGGGCATGCTTCGGG
ENST00000374550|1|+|23693850|23693895|74|(Target-AID;+;@17;NG;CGA:TGA;R:*;)	ENST00000374550	74	*	GTTCGAGGGGCCAAGGCAGAAG
ENST00000458455|1|+|23693850|23693895|64|(Target-AID;+;@17;NG;CGA:TGA;R:*;)	ENST00000458455	64	*	GTTCGAGGGGCCAAGGCAGAAG
ENST00000643754|1|+|23693850|23693895|75|(Target-AID;+;@17;NG;CGA:TGA;R:*;)	ENST00000643754	75	*	GTTCGAGGGGCCAAGGCAGAAG
ENST00000374550|1|+|23694710|23694755|112|(Target-AID;+;@18;NG;ATC:ATT;I:I;)	ENST00000374550	112	I	ATCGATCTGGGTATCAAATATG
ENST00000458455|1|+|23694710|23694755|102|(Target-AID;+;@18;NG;ATC:ATT;I:I;)	ENST00000458455	102	I	ATCGATCTGGGTATCAAATATG
ENST00000643754|1|+|23694710|23694755|113|(Target-AID;+;@18;NG;ATC:ATT;I:I;)	ENST00000643754	113	I	ATCGATCTGGGTATCAAATATG
ENST00000236255|1|+|24342216|24342261|396|(Target-AID;+;@19;NG;CGT:TGT;R:C;)	ENST00000236255	396	C	CCGTGCTGTCTGCCAGATCAAG
ENST00000350501|1|+|24342216|24342261|391|(Target-AID;+;@19;NG;CGT:TGT;R:C;)	ENST00000350501	391	C	CCGTGCTGTCTGCCAGATCAAG
ENST00000356046|1|+|24342216|24342261|345|(Target-AID;+;@19;NG;CGT:TGT;R:C;)	ENST00000356046	345	C	CCGTGCTGTCTGCCAGATCAAG
ENST00000361548|1|+|24342216|24342261|391|(Target-AID;+;@19;NG;CGT:TGT;R:C;)	ENST00000361548	391	C	CCGTGCTGTCTGCCAGATCAAG
ENST00000629778|1|+|209938229|209938274|1|(ABE;-;@15;NGG;ATG:ACG;M:T;)	ENST00000629778	1	T	TCGCCATGGACCGCACCAACTGG
ENST00000629778|1|+|209938229|209938274|1|(ABE;-;@16;NG;ATG:ACG;M:T;)	ENST00000629778	1	T	CGCCATGGACCGCACCAACTGG
ENST00000629778|1|+|209938229|209938274|1|(ABE;-;@15;NG;ATG:ACG;M:T;)	ENST00000629778	1	T	TCGCCATGGACCGCACCAACTG
ENST00000367015|1|+|210155849|210155894|401|(Target-AID;-;@17;NG;GGC:GAC;G:D;)	ENST00000367015	401	D	CTGCCTTTTATCACTTCTGCTG
ENST00000367019|1|+|210155849|210155894|439|(Target-AID;-;@17;NG;GGC:GAC;G:D;)	ENST00000367019	439	D	CTGCCTTTTATCACTTCTGCTG
ENST00000472886|1|+|210155849|210155894|439|(Target-AID;-;@17;NG;GGC:GAC;G:D;)	ENST00000472886	439	D	CTGCCTTTTATCACTTCTGCTG
ENST00000537238|1|+|210155849|210155894|401|(Target-AID;-;@17;NG;GGC:GAC;G:D;)	ENST00000537238	401	D	CTGCCTTTTATCACTTCTGCTG
ENST00000629778|1|+|210155849|210155894|484|(Target-AID;-;@17;NG;GGC:GAC;G:D;)	ENST00000629778	484	D	CTGCCTTTTATCACTTCTGCTG
ENST00000637265|1|+|210155849|210155894|729|(Target-AID;-;@17;NG;GGC:GAC;G:D;)	ENST00000637265	729	D	CTGCCTTTTATCACTTCTGCTG
ENST00000366971|1|+|212858431|212858476|1|(Target-AID;-;@19;NG;ATG:ATA;M:I;)	ENST00000366971	1	I	CCATATCCCAGGCTCCCCGGCG
ENST00000366971|1|+|212858791|212858836|121|(ABE;+;@13;NG;AAC:GAC;N:D;)	ENST00000366971	121	D	GCTGGTCAACGCCTTTCAGTGG
ENST00000366971|1|+|212859004|212859049|192|(ABE;-;@17;NGG;TGC:CGC;C:R;)	ENST00000366971	192	R	CGCACTTGATCCAGGCACCCAGG
ENST00000366971|1|+|212859004|212859049|192|(ABE;-;@17;NG;TGC:CGC;C:R;)	ENST00000366971	192	R	CGCACTTGATCCAGGCACCCAG
ENST00000366929|1|+|218346890|218346935|71|(Target-AID;+;@17;NG;TAC:TAT;Y:Y;)	ENST00000366929	71	Y	CTACAACAGCACCAGGGACTTG
ENST00000366930|1|+|218346890|218346935|71|(Target-AID;+;@17;NG;TAC:TAT;Y:Y;)	ENST00000366930	71	Y	CTACAACAGCACCAGGGACTTG
ENST00000366929|1|+|218405191|218405236|159|(Target-AID;+;@19;NG;CGA:TGA;R:*;)	ENST00000366929	159	*	TCGATTTGACGTCTCAGCAATG
ENST00000366929|1|+|218405191|218405236|159|(Target-AID;+;@19;NGG;CGA:TGA;R:*;)	ENST00000366929	159	*	TCGATTTGACGTCTCAGCAATGG
ENST00000366930|1|+|218405191|218405236|131|(Target-AID;+;@19;NG;CGA:TGA;R:*;)	ENST00000366930	131	*	TCGATTTGACGTCTCAGCAATG
ENST00000366930|1|+|218405191|218405236|131|(Target-AID;+;@19;NGG;CGA:TGA;R:*;)	ENST00000366930	131	*	TCGATTTGACGTCTCAGCAATGG
ENST00000366929|1|+|218405257|218405302|181|(Target-AID;-;@17;NG;CGT:CAT;R:H;)	ENST00000366929	181	H	AAACGAAAGACTCTGAACTCTG
ENST00000366930|1|+|218405257|218405302|153|(Target-AID;-;@17;NG;CGT:CAT;R:H;)	ENST00000366930	153	H	AAACGAAAGACTCTGAACTCTG
ENST00000366929|1|+|218436088|218436133|327|(Target-AID;+;@17;NG;CGG:TGG;R:W;)	ENST00000366929	327	W	CGGCGGAAGAAGCGTGCTTTGG
ENST00000366930|1|+|218436088|218436133|299|(Target-AID;+;@17;NG;CGG:TGG;R:W;)	ENST00000366930	299	W	CGGCGGAAGAAGCGTGCTTTGG
ENST00000366922|1|+|220137968|220138013|708|(Target-AID;-;@19;NG;GAA:AAA;E:K;)	ENST00000366922	708	K	TCGGTGAAGACATTGGAATCAG
ENST00000366782|1|+|226883794|226883839|118|(Target-AID;+;@18;NG;GCG:GTG;A:V;)	ENST00000366782	118	V	AGCGAAGCACGTGATCATGCTG
ENST00000366783|1|+|226883794|226883839|85|(Target-AID;+;@18;NG;GCG:GTG;A:V;)	ENST00000366783	85	V	AGCGAAGCACGTGATCATGCTG
ENST00000422240|1|+|226883794|226883839|85|(Target-AID;+;@18;NG;GCG:GTG;A:V;)	ENST00000422240	85	V	AGCGAAGCACGTGATCATGCTG
ENST00000626989|1|+|226883794|226883839|118|(Target-AID;+;@18;NG;GCG:GTG;A:V;)	ENST00000626989	118	V	AGCGAAGCACGTGATCATGCTG
ENST00000366782|1|+|226895498|226895543|463|(Target-AID;+;@18;NG;ACG:ATG;T:M;)	ENST00000366782	463	M	CACGGACAACCTGGTGCGGCCG
ENST00000366783|1|+|226895498|226895543|430|(Target-AID;+;@18;NG;ACG:ATG;T:M;)	ENST00000366783	430	M	CACGGACAACCTGGTGCGGCCG
ENST00000422240|1|+|226895498|226895543|429|(Target-AID;+;@18;NG;ACG:ATG;T:M;)	ENST00000422240	429	M	CACGGACAACCTGGTGCGGCCG
ENST00000472139|1|+|226895498|226895543|286|(Target-AID;+;@18;NG;ACG:ATG;T:M;)	ENST00000472139	286	M	CACGGACAACCTGGTGCGGCCG
ENST00000626989|1|+|226895498|226895543|463|(Target-AID;+;@18;NG;ACG:ATG;T:M;)	ENST00000626989	463	M	CACGGACAACCTGGTGCGGCCG
ENST00000366777|1|+|226982085|226982130|271|(Target-AID;+;@19;NG;CGT:TGT;R:C;)	ENST00000366777	271	C	GCGTGGTGCGGCACTCAAGCTG
ENST00000366777|1|+|226982085|226982130|271|(Target-AID;+;@19;NGG;CGT:TGT;R:C;)	ENST00000366777	271	C	GCGTGGTGCGGCACTCAAGCTGG
ENST00000366778|1|+|226982085|226982130|219|(Target-AID;+;@19;NG;CGT:TGT;R:C;)	ENST00000366778	219	C	GCGTGGTGCGGCACTCAAGCTG
ENST00000366778|1|+|226982085|226982130|219|(Target-AID;+;@19;NGG;CGT:TGT;R:C;)	ENST00000366778	219	C	GCGTGGTGCGGCACTCAAGCTGG
ENST00000366779|1|+|226982085|226982130|271|(Target-AID;+;@19;NG;CGT:TGT;R:C;)	ENST00000366779	271	C	GCGTGGTGCGGCACTCAAGCTG
ENST00000366779|1|+|226982085|226982130|271|(Target-AID;+;@19;NGG;CGT:TGT;R:C;)	ENST00000366779	271	C	GCGTGGTGCGGCACTCAAGCTGG
ENST00000366777|1|+|226982697|226982742|299|(Target-AID;+;@17;NG;CGG:TGG;R:W;)	ENST00000366777	299	W	GAGCGGGTGCGGCAGAGCGCGG
ENST00000366778|1|+|226982697|226982742|247|(Target-AID;+;@17;NG;CGG:TGG;R:W;)	ENST00000366778	247	W	GAGCGGGTGCGGCAGAGCGCGG
ENST00000366779|1|+|226982697|226982742|299|(Target-AID;+;@17;NG;CGG:TGG;R:W;)	ENST00000366779	299	W	GAGCGGGTGCGGCAGAGCGCGG
ENST00000366777|1|+|226982703|226982748|301|(Target-AID;+;@19;NG;CGG:TGG;R:W;)	ENST00000366777	301	W	GCGGCAGAGCGCGGACTTCATG
ENST00000366778|1|+|226982703|226982748|249|(Target-AID;+;@19;NG;CGG:TGG;R:W;)	ENST00000366778	249	W	GCGGCAGAGCGCGGACTTCATG
ENST00000366779|1|+|226982703|226982748|301|(Target-AID;+;@19;NG;CGG:TGG;R:W;)	ENST00000366779	301	W	GCGGCAGAGCGCGGACTTCATG
ENST00000366777|1|+|226982712|226982757|304|(Target-AID;+;@18;NG;GCG:GTG;A:V;)	ENST00000366777	304	V	CGCGGACTTCATGCCACTGAAG
ENST00000366778|1|+|226982712|226982757|252|(Target-AID;+;@18;NG;GCG:GTG;A:V;)	ENST00000366778	252	V	CGCGGACTTCATGCCACTGAAG
ENST00000366779|1|+|226982712|226982757|304|(Target-AID;+;@18;NG;GCG:GTG;A:V;)	ENST00000366779	304	V	CGCGGACTTCATGCCACTGAAG
ENST00000366777|1|+|226982923|226982968|331|(Target-AID;+;@18;NG;TTC:TTT;F:F;)	ENST00000366777	331	F	TTCGAGGAGCGGCCCTTCGCCG
ENST00000366778|1|+|226982923|226982968|279|(Target-AID;+;@18;NG;TTC:TTT;F:F;)	ENST00000366778	279	F	TTCGAGGAGCGGCCCTTCGCCG
ENST00000366779|1|+|226982923|226982968|331|(Target-AID;+;@18;NG;TTC:TTT;F:F;)	ENST00000366779	331	F	TTCGAGGAGCGGCCCTTCGCCG
ENST00000366777|1|+|226982959|226983004|343|(ABE;+;@14;NG;CAG:CGG;Q:R;)	ENST00000366777	343	R	TTGGGCAGGTGCACTTGGCCCG
ENST00000366778|1|+|226982959|226983004|291|(ABE;+;@14;NG;CAG:CGG;Q:R;)	ENST00000366778	291	R	TTGGGCAGGTGCACTTGGCCCG
ENST00000366779|1|+|226982959|226983004|343|(ABE;+;@14;NG;CAG:CGG;Q:R;)	ENST00000366779	343	R	TTGGGCAGGTGCACTTGGCCCG
ENST00000366777|1|+|226982974|226983019|348|(Target-AID;+;@19;NG;CGA:TGA;R:*;)	ENST00000366777	348	*	CCGAATGAAGGGCGGCCGCGAG
ENST00000366777|1|+|226982974|226983019|348|(Target-AID;+;@19;NGG;CGA:TGA;R:*;)	ENST00000366777	348	*	CCGAATGAAGGGCGGCCGCGAGG
ENST00000366778|1|+|226982974|226983019|296|(Target-AID;+;@19;NG;CGA:TGA;R:*;)	ENST00000366778	296	*	CCGAATGAAGGGCGGCCGCGAG
ENST00000366778|1|+|226982974|226983019|296|(Target-AID;+;@19;NGG;CGA:TGA;R:*;)	ENST00000366778	296	*	CCGAATGAAGGGCGGCCGCGAGG
ENST00000366779|1|+|226982974|226983019|348|(Target-AID;+;@19;NG;CGA:TGA;R:*;)	ENST00000366779	348	*	CCGAATGAAGGGCGGCCGCGAG
ENST00000366779|1|+|226982974|226983019|348|(Target-AID;+;@19;NGG;CGA:TGA;R:*;)	ENST00000366779	348	*	CCGAATGAAGGGCGGCCGCGAGG
ENST00000366777|1|+|226983804|226983849|410|(Target-AID;+;@18;NG;CGA:TGA;R:*;)	ENST00000366777	410	*	AGCGAGAGGCCGCCTGTGCCCG
ENST00000366778|1|+|226983804|226983849|358|(Target-AID;+;@18;NG;CGA:TGA;R:*;)	ENST00000366778	358	*	AGCGAGAGGCCGCCTGTGCCCG
ENST00000366779|1|+|226983804|226983849|410|(Target-AID;+;@18;NG;CGA:TGA;R:*;)	ENST00000366779	410	*	AGCGAGAGGCCGCCTGTGCCCG
ENST00000366777|1|+|226983804|226983849|410|(Target-AID;-;@18;NGG;CGA:CAA;R:Q;)	ENST00000366777	410	Q	CTCGCTGGTAGTCACACTCCAGG
ENST00000366777|1|+|226983804|226983849|410|(Target-AID;-;@18;NG;CGA:CAA;R:Q;)	ENST00000366777	410	Q	CTCGCTGGTAGTCACACTCCAG
ENST00000366778|1|+|226983804|226983849|358|(Target-AID;-;@18;NGG;CGA:CAA;R:Q;)	ENST00000366778	358	Q	CTCGCTGGTAGTCACACTCCAGG
ENST00000366778|1|+|226983804|226983849|358|(Target-AID;-;@18;NG;CGA:CAA;R:Q;)	ENST00000366778	358	Q	CTCGCTGGTAGTCACACTCCAG
ENST00000366779|1|+|226983804|226983849|410|(Target-AID;-;@18;NGG;CGA:CAA;R:Q;)	ENST00000366779	410	Q	CTCGCTGGTAGTCACACTCCAGG
ENST00000366779|1|+|226983804|226983849|410|(Target-AID;-;@18;NG;CGA:CAA;R:Q;)	ENST00000366779	410	Q	CTCGCTGGTAGTCACACTCCAG
ENST00000366777|1|+|226986434|226986479|555|(Target-AID;-;@19;NG;ATG:ATA;M:I;)	ENST00000366777	555	I	CCATGACCTGGGGCAAGAGAGG
ENST00000366778|1|+|226986434|226986479|503|(Target-AID;-;@19;NG;ATG:ATA;M:I;)	ENST00000366778	503	I	CCATGACCTGGGGCAAGAGAGG
ENST00000366779|1|+|226986434|226986479|555|(Target-AID;-;@19;NG;ATG:ATA;M:I;)	ENST00000366779	555	I	CCATGACCTGGGGCAAGAGAGG
ENST00000366714|1|+|228157752|228157797|6|(Target-AID;-;@19;NGG;TGG:TAG;W:*;)	ENST00000366714	6	*	CCAGCTCATGTTGGTCATAGGGG
ENST00000366714|1|+|228157752|228157797|6|(Target-AID;-;@19;NG;TGG:TAG;W:*;)	ENST00000366714	6	*	CCAGCTCATGTTGGTCATAGGG
ENST00000366714|1|+|228157842|228157887|36|(Target-AID;+;@18;NG;ATC:ATT;I:I;)	ENST00000366714	36	I	ATCGTGCTGACGGCTGTGGGCG
ENST00000366714|1|+|228157842|228157887|36|(Target-AID;+;@19;NG;ATC:ATT;I:I;)	ENST00000366714	36	I	TCGTGCTGACGGCTGTGGGCGG
ENST00000366714|1|+|228157842|228157887|36|(Target-AID;+;@18;NGG;ATC:ATT;I:I;)	ENST00000366714	36	I	ATCGTGCTGACGGCTGTGGGCGG
ENST00000366714|1|+|228158454|228158499|240|(Target-AID;+;@18;NG;CGA:TGA;R:*;)	ENST00000366714	240	*	TGCGACCGTTCTTTCCCTGCAG
ENST00000366714|1|+|228158523|228158568|263|(Target-AID;-;@18;NG;GAA:AAA;E:K;)	ENST00000366714	263	K	TTCAGTAGGGCGCGACACGAAG
ENST00000366714|1|+|228158592|228158637|286|(ABE;-;@15;NG;ATG:ACG;M:T;)	ENST00000366714	286	T	GGGCCATCTCACAGAGGTTGAG
ENST00000366714|1|+|228158592|228158637|286|(ABE;-;@13;NG;ATG:ACG;M:T;)	ENST00000366714	286	T	GTGGGCCATCTCACAGAGGTTG
ENST00000310256|1|+|230995854|230995899|189|(Target-AID;-;@19;NG;GGA:AGA;G:R;)	ENST00000310256	189	R	CCGTAGCTAGATAATAATAATG
ENST00000366658|1|+|230995854|230995899|149|(Target-AID;-;@19;NG;GGA:AGA;G:R;)	ENST00000366658	149	R	CCGTAGCTAGATAATAATAATG
ENST00000366647|1|+|231272322|231272367|519|(ABE;+;@13;NG;GAT:GGT;D:G;)	ENST00000366647	519	G	CTACGTGATGTTTTTGCAGATG
ENST00000366647|1|+|231272322|231272367|519|(ABE;+;@15;NG;GAT:GGT;D:G;)	ENST00000366647	519	G	ACGTGATGTTTTTGCAGATGAG
ENST00000366612|1|+|234374281|234374326|20|(ABE;-;@13;NG;TGG:CGG;W:R;)	ENST00000366612	20	R	CACTTCCAGTACTCATCCCGGG
ENST00000366613|1|+|234374281|234374326|66|(ABE;-;@13;NG;TGG:CGG;W:R;)	ENST00000366613	66	R	CACTTCCAGTACTCATCCCGGG
ENST00000366615|1|+|234374281|234374326|96|(ABE;-;@13;NG;TGG:CGG;W:R;)	ENST00000366615	96	R	CACTTCCAGTACTCATCCCGGG
ENST00000619305|1|+|234374281|234374326|20|(ABE;-;@13;NG;TGG:CGG;W:R;)	ENST00000619305	20	R	CACTTCCAGTACTCATCCCGGG
ENST00000334232|1|+|236482346|236482391|123|(Target-AID;-;@18;NG;GAC:AAC;D:N;)	ENST00000334232	123	N	GTCTAGTAAGTCCTGATCATTG
ENST00000359362|1|+|236482346|236482391|113|(Target-AID;-;@18;NG;GAC:AAC;D:N;)	ENST00000359362	113	N	GTCTAGTAAGTCCTGATCATTG
ENST00000637660|1|+|236482346|236482391|101|(Target-AID;-;@18;NG;GAC:AAC;D:N;)	ENST00000637660	101	N	GTCTAGTAAGTCCTGATCATTG
ENST00000366578|1|+|236720148|236720193|143|(ABE;+;@13;NG;ATT:GTT;I:V;)	ENST00000366578	143	V	CTTTGCTATTCAGGATATTTCG
ENST00000366578|1|+|236720148|236720193|143|(ABE;+;@14;NG;ATT:GTT;I:V;)	ENST00000366578	143	V	TTTGCTATTCAGGATATTTCGG
ENST00000366578|1|+|236720148|236720193|143|(ABE;+;@13;NGG;ATT:GTT;I:V;)	ENST00000366578	143	V	CTTTGCTATTCAGGATATTTCGG
ENST00000542672|1|+|236720148|236720193|143|(ABE;+;@13;NG;ATT:GTT;I:V;)	ENST00000542672	143	V	CTTTGCTATTCAGGATATTTCG
ENST00000542672|1|+|236720148|236720193|143|(ABE;+;@14;NG;ATT:GTT;I:V;)	ENST00000542672	143	V	TTTGCTATTCAGGATATTTCGG
ENST00000542672|1|+|236720148|236720193|143|(ABE;+;@13;NGG;ATT:GTT;I:V;)	ENST00000542672	143	V	CTTTGCTATTCAGGATATTTCGG
ENST00000366578|1|+|236731277|236731322|228|(ABE;-;@16;NG;ATG:ACG;M:T;)	ENST00000366578	228	T	CAACATTTTAGGAATATCCAGG
ENST00000542672|1|+|236731277|236731322|228|(ABE;-;@16;NG;ATG:ACG;M:T;)	ENST00000542672	228	T	CAACATTTTAGGAATATCCAGG
ENST00000366578|1|+|236739295|236739340|298|(Target-AID;-;@18;NG;CGT:CAT;R:H;)	ENST00000366578	298	H	GACGAATCCATTCCAAAAGCTG
ENST00000542672|1|+|236739295|236739340|298|(Target-AID;-;@18;NG;CGT:CAT;R:H;)	ENST00000542672	298	H	GACGAATCCATTCCAAAAGCTG
ENST00000546208|1|+|236739295|236739340|90|(Target-AID;-;@18;NG;CGT:CAT;R:H;)	ENST00000546208	90	H	GACGAATCCATTCCAAAAGCTG
ENST00000366578|1|+|236744729|236744774|461|(Target-AID;+;@17;NG;ATC:ATT;I:I;)	ENST00000366578	461	I	GATCGCAGCCATCGCGCAGGAG
ENST00000542672|1|+|236744729|236744774|461|(Target-AID;+;@17;NG;ATC:ATT;I:I;)	ENST00000542672	461	I	GATCGCAGCCATCGCGCAGGAG
ENST00000546208|1|+|236744729|236744774|253|(Target-AID;+;@17;NG;ATC:ATT;I:I;)	ENST00000546208	253	I	GATCGCAGCCATCGCGCAGGAG
ENST00000366578|1|+|236747721|236747766|495|(Target-AID;+;@17;NG;ACG:ATG;T:M;)	ENST00000366578	495	M	GAACGCTTACTCAGAAGAGGAG
ENST00000542672|1|+|236747721|236747766|495|(Target-AID;+;@17;NG;ACG:ATG;T:M;)	ENST00000542672	495	M	GAACGCTTACTCAGAAGAGGAG
ENST00000546208|1|+|236747721|236747766|287|(Target-AID;+;@17;NG;ACG:ATG;T:M;)	ENST00000546208	287	M	GAACGCTTACTCAGAAGAGGAG
ENST00000366578|1|+|236751538|236751583|583|(ABE;+;@14;NG;GAG:GGG;E:G;)	ENST00000366578	583	G	AGGTGGAGAAGGTGATTCAGAG
ENST00000542672|1|+|236751538|236751583|583|(ABE;+;@14;NG;GAG:GGG;E:G;)	ENST00000542672	583	G	AGGTGGAGAAGGTGATTCAGAG
ENST00000546208|1|+|236751538|236751583|375|(ABE;+;@14;NG;GAG:GGG;E:G;)	ENST00000546208	375	G	AGGTGGAGAAGGTGATTCAGAG
ENST00000366578|1|+|236753967|236754012|628|(ABE;+;@16;NG;GAG:GGG;E:G;)	ENST00000366578	628	G	GAGGAGCTGGCTCGCCAGCATG
ENST00000542672|1|+|236753967|236754012|628|(ABE;+;@16;NG;GAG:GGG;E:G;)	ENST00000542672	628	G	GAGGAGCTGGCTCGCCAGCATG
ENST00000546208|1|+|236753967|236754012|420|(ABE;+;@16;NG;GAG:GGG;E:G;)	ENST00000546208	420	G	GAGGAGCTGGCTCGCCAGCATG
ENST00000366578|1|+|236754003|236754048|640|(Target-AID;-;@17;NG;CGC:CAC;R:H;)	ENST00000366578	640	H	TGGCGCCTCAGACGCTCGTTAG
ENST00000542672|1|+|236754003|236754048|640|(Target-AID;-;@17;NG;CGC:CAC;R:H;)	ENST00000542672	640	H	TGGCGCCTCAGACGCTCGTTAG
ENST00000546208|1|+|236754003|236754048|432|(Target-AID;-;@17;NG;CGC:CAC;R:H;)	ENST00000546208	432	H	TGGCGCCTCAGACGCTCGTTAG
ENST00000366578|1|+|236762490|236762535|860|(Target-AID;+;@19;NG;CAG:TAG;Q:*;)	ENST00000366578	860	*	CCAGTACTGCATCAAGAGGATG
ENST00000542672|1|+|236762490|236762535|860|(Target-AID;+;@19;NG;CAG:TAG;Q:*;)	ENST00000542672	860	*	CCAGTACTGCATCAAGAGGATG
ENST00000546208|1|+|236762490|236762535|652|(Target-AID;+;@19;NG;CAG:TAG;Q:*;)	ENST00000546208	652	*	CCAGTACTGCATCAAGAGGATG
ENST00000366574|1|+|237377342|237377387|169|(Target-AID;-;@18;NG;CGA:CAA;R:Q;)	ENST00000366574	169	Q	ATCGCTGCTTAGAGGCAGGGTG
ENST00000366574|1|+|237388070|237388115|228|(Target-AID;+;@19;NG;CTC:CTT;L:L;)	ENST00000366574	228	L	TCATTGGTGGTGATGTCCTCAG
ENST00000366574|1|+|237388070|237388115|228|(Target-AID;+;@19;NGG;CTC:CTT;L:L;)	ENST00000366574	228	L	TCATTGGTGGTGATGTCCTCAGG
ENST00000366574|1|+|237388091|237388136|235|(Target-AID;-;@19;NG;AGG:AAG;R:K;)	ENST00000366574	235	K	CCTGAGGACATCACCACCAATG
ENST00000366574|1|+|237441342|237441387|351|(ABE;+;@16;NG;ACA:ACG;T:T;)	ENST00000366574	351	T	GAACATCTGAAATAAAATACGG
ENST00000366574|1|+|237456710|237456755|537|(Target-AID;+;@18;NG;CTG:TTG;L:L;)	ENST00000366574	537	L	TGCTGGGTAAGAAGCATGATTG
ENST00000366574|1|+|237456710|237456755|537|(Target-AID;+;@19;NG;CTG:TTG;L:L;)	ENST00000366574	537	L	GCTGGGTAAGAAGCATGATTGG
ENST00000366574|1|+|237456710|237456755|537|(Target-AID;+;@18;NGG;CTG:TTG;L:L;)	ENST00000366574	537	L	TGCTGGGTAAGAAGCATGATTGG
ENST00000366574|1|+|237456710|237456755|537|(Target-AID;+;@19;NGG;CTG:TTG;L:L;)	ENST00000366574	537	L	GCTGGGTAAGAAGCATGATTGGG
ENST00000366574|1|+|237492950|237492995|616|(Target-AID;+;@18;NG;TCA:TTA;S:L;)	ENST00000366574	616	L	CTCACTCTGTGTTTGCCACGGG
ENST00000366574|1|+|237492950|237492995|616|(Target-AID;+;@18;NGG;TCA:TTA;S:L;)	ENST00000366574	616	L	CTCACTCTGTGTTTGCCACGGGG
ENST00000366574|1|+|237500784|237500829|767|(Target-AID;-;@19;NG;TCG:TCA;S:S;)	ENST00000366574	767	S	ACGAGATGCTTGGGGCACTCAG
ENST00000366574|1|+|237503442|237503487|858|(Target-AID;-;@17;NG;ACG:ACA;T:T;)	ENST00000366574	858	T	TTGCGTCAGGGAAACTGTGGGG
ENST00000366574|1|+|237511717|237511762|924|(Target-AID;-;@19;NGG;CTG:CTA;L:L;)	ENST00000366574	924	L	GCAGCTTGGAGAACTCCACCAGG
ENST00000366574|1|+|237511717|237511762|924|(Target-AID;-;@19;NG;CTG:CTA;L:L;)	ENST00000366574	924	L	GCAGCTTGGAGAACTCCACCAG
ENST00000366574|1|+|237548554|237548599|1018|(ABE;-;@13;NG;TAT:TAC;Y:Y;)	ENST00000366574	1018	Y	GGATGCCATAAGTCCAGCCCTG
ENST00000366574|1|+|237566553|237566598|1075|(Target-AID;+;@19;NG;GCC:GCT;A:A;)	ENST00000366574	1075	A	CCGAAGTGTGCAGCGGCACCGG
ENST00000366574|1|+|237566553|237566598|1075|(Target-AID;+;@19;NGG;GCC:GCT;A:A;)	ENST00000366574	1075	A	CCGAAGTGTGCAGCGGCACCGGG
ENST00000366574|1|+|237566559|237566604|1077|(ABE;-;@17;NGG;GTG:GCG;V:A;)	ENST00000366574	1077	A	CACACTTCGGCTCTGGCTGCTGG
ENST00000366574|1|+|237566559|237566604|1077|(ABE;-;@17;NG;GTG:GCG;V:A;)	ENST00000366574	1077	A	CACACTTCGGCTCTGGCTGCTG
ENST00000366574|1|+|237566649|237566694|1107|(Target-AID;+;@18;NG;ACG:ATG;T:M;)	ENST00000366574	1107	M	GACGGTCACTGCTGGAGACATG
ENST00000366574|1|+|237566709|237566754|1127|(ABE;+;@17;NG;GAG:GGG;E:G;)	ENST00000366574	1127	G	AGGAGCTTGGCTCAGATGAACG
ENST00000366574|1|+|237590852|237590897|1348|(Target-AID;-;@17;NG;AAG:AAA;K:K;)	ENST00000366574	1348	K	TGTCTTCATCAGAACCTCAAAG
ENST00000366574|1|+|237590879|237590924|1357|(Target-AID;-;@19;NG;GAT:AAT;D:N;)	ENST00000366574	1357	N	TCGGGCACTAGATGGCCATGAG
ENST00000366574|1|+|237590879|237590924|1357|(Target-AID;-;@17;NG;GAT:AAT;D:N;)	ENST00000366574	1357	N	GATCGGGCACTAGATGGCCATG
ENST00000366574|1|+|237610749|237610794|1565|(ABE;-;@16;NGG;CCT:CCC;P:P;)	ENST00000366574	1565	P	AGAGAGGCATCACATTCTAGCGG
ENST00000366574|1|+|237610749|237610794|1565|(ABE;-;@16;NG;CCT:CCC;P:P;)	ENST00000366574	1565	P	AGAGAGGCATCACATTCTAGCG
ENST00000366574|1|+|237610788|237610833|1578|(Target-AID;+;@19;NG;CCC:CCT;P:P;)	ENST00000366574	1578	P	CCGTGCCGCAGTGCCCCCCGCG
ENST00000366574|1|+|237614258|237614303|1718|(Target-AID;-;@17;NG;AGG:AGA;R:R;)	ENST00000366574	1718	R	GAGCCTGGCAGTGGCATAGGAG
ENST00000366574|1|+|237614276|237614321|1724|(Target-AID;-;@18;NGG;GAG:AAG;E:K;)	ENST00000366574	1724	K	CTCGTTGTTCATCATGAGCCTGG
ENST00000366574|1|+|237614276|237614321|1724|(Target-AID;-;@19;NG;GAG:AAG;E:K;)	ENST00000366574	1724	K	TCGTTGTTCATCATGAGCCTGG
ENST00000366574|1|+|237614276|237614321|1724|(Target-AID;-;@18;NG;GAG:AAG;E:K;)	ENST00000366574	1724	K	CTCGTTGTTCATCATGAGCCTG
ENST00000366574|1|+|237639046|237639091|2328|(Target-AID;+;@17;NG;CCT:TCT;P:S;)	ENST00000366574	2328	S	AGGCCTGAGTGTTTTGGTCCTG
ENST00000366574|1|+|237640918|237640963|2387|(Target-AID;-;@18;NG;GCG:ACG;A:T;)	ENST00000366574	2387	T	CGCGTTCCCCATGTGGATAGTG
ENST00000366574|1|+|237640918|237640963|2387|(Target-AID;+;@19;NG;GCG:GTG;A:V;)	ENST00000366574	2387	V	GCGATCATGACCTTCTATTCAG
ENST00000366574|1|+|237640918|237640963|2387|(Target-AID;-;@18;NG;GCG:GCA;A:A;)	ENST00000366574	2387	A	ATCGCGTTCCCCATGTGGATAG
ENST00000366574|1|+|237648463|237648508|2462|(Target-AID;+;@19;NG;CCA:CTA;P:L;)	ENST00000366574	2462	L	CCAGATCACAAGGCAGCCATGG
ENST00000366574|1|+|237707211|237707256|3289|(Target-AID;-;@17;NG;GGG:GGA;G:G;)	ENST00000366574	3289	G	AATCCCCAAGTTATTATATATG
ENST00000366574|1|+|237772001|237772046|3857|(ABE;+;@16;NG;TAT:TGT;Y:C;)	ENST00000366574	3857	C	AATTATCTGAGAACTCAGACTG
ENST00000366574|1|+|237772001|237772046|3857|(ABE;+;@17;NG;TAT:TGT;Y:C;)	ENST00000366574	3857	C	ATTATCTGAGAACTCAGACTGG
ENST00000366574|1|+|237772001|237772046|3857|(ABE;+;@16;NGG;TAT:TGT;Y:C;)	ENST00000366574	3857	C	AATTATCTGAGAACTCAGACTGG
ENST00000366574|1|+|237773615|237773660|3922|(Target-AID;-;@17;NG;GAG:GAA;E:E;)	ENST00000366574	3922	E	ATACTCTGTAAGAGTGTTAAAG
ENST00000366574|1|+|237778701|237778746|3945|(Target-AID;+;@18;NG;GTC:GTT;V:V;)	ENST00000366574	3945	V	GTCGGCTTTCTTCATGTGTTTG
ENST00000366574|1|+|237781621|237781666|3987|(Target-AID;-;@18;NG;GAA:AAA;E:K;)	ENST00000366574	3987	K	TTCTAACATGGACAGCAACATG
ENST00000366574|1|+|237783676|237783721|3996|(Target-AID;+;@17;NG;GGC:GGT;G:G;)	ENST00000366574	3996	G	TGGCAAACAGATGGTGGATATG
ENST00000366574|1|+|237783685|237783730|3999|(ABE;+;@16;NG;ATG:GTG;M:V;)	ENST00000366574	3999	V	ACAGATGGTGGATATGCTTGTG
ENST00000366574|1|+|237783685|237783730|3999|(ABE;+;@17;NG;ATG:GTG;M:V;)	ENST00000366574	3999	V	CAGATGGTGGATATGCTTGTGG
ENST00000366574|1|+|237783685|237783730|3999|(ABE;+;@16;NGG;ATG:GTG;M:V;)	ENST00000366574	3999	V	ACAGATGGTGGATATGCTTGTGG
ENST00000366574|1|+|237783988|237784033|4100|(Target-AID;-;@18;NG;GTC:ATC;V:I;)	ENST00000366574	4100	I	GACGGCGACGTTGAAGCCGATG
ENST00000366574|1|+|237783991|237784036|4101|(Target-AID;+;@19;NG;CTT:TTT;L:F;)	ENST00000366574	4101	F	CCTTCTGACAAACCTCTCTGAG
ENST00000366574|1|+|237784060|237784105|4124|(Target-AID;+;@17;NG;AGC:AGT;S:S;)	ENST00000366574	4124	S	GAGCGTCCTGAATTATTTCCAG
ENST00000366574|1|+|237784393|237784438|4235|(Target-AID;+;@19;NG;TTC:TTT;F:F;)	ENST00000366574	4235	F	TCTTCTCCATTCTGACGGTCAG
ENST00000366574|1|+|237784393|237784438|4235|(Target-AID;+;@19;NGG;TTC:TTT;F:F;)	ENST00000366574	4235	F	TCTTCTCCATTCTGACGGTCAGG
ENST00000366574|1|+|237791419|237791464|4497|(Target-AID;+;@18;NG;CGC:TGC;R:C;)	ENST00000366574	4497	C	CTCGCAACTTTTACAACATGAG
ENST00000366574|1|+|237792182|237792227|4555|(Target-AID;+;@18;NG;ATC:ATT;I:I;)	ENST00000366574	4555	I	ATCGCAGTTCACTATGTACTAG
ENST00000366574|1|+|237793884|237793929|4608|(Target-AID;+;@18;NG;CGG:TGG;R:W;)	ENST00000366574	4608	W	CACGGAAATTGGAATTTGATGG
ENST00000366574|1|+|237793884|237793929|4608|(Target-AID;+;@19;NG;CGG:TGG;R:W;)	ENST00000366574	4608	W	ACGGAAATTGGAATTTGATGGG
ENST00000366574|1|+|237793884|237793929|4608|(Target-AID;+;@18;NGG;CGG:TGG;R:W;)	ENST00000366574	4608	W	CACGGAAATTGGAATTTGATGGG
ENST00000366574|1|+|237798039|237798084|4661|(Target-AID;+;@18;NG;TAC:TAT;Y:Y;)	ENST00000366574	4661	Y	TACGGCCGAGACAGAATCAGTG
ENST00000366574|1|+|237806250|237806295|4763|(ABE;+;@17;NG;AAT:AGT;N:S;)	ENST00000366574	4763	S	ACAATGGCAAACAGGTAAACAG
ENST00000366574|1|+|237819044|237819089|4822|(Target-AID;-;@18;NGG;CGT:CAT;R:H;)	ENST00000366574	4822	H	CACGAACTCCAACATACATGTGG
ENST00000366574|1|+|237819044|237819089|4822|(Target-AID;-;@19;NG;CGT:CAT;R:H;)	ENST00000366574	4822	H	ACGAACTCCAACATACATGTGG
ENST00000366574|1|+|237819044|237819089|4822|(Target-AID;-;@18;NG;CGT:CAT;R:H;)	ENST00000366574	4822	H	CACGAACTCCAACATACATGTG
ENST00000366574|1|+|237830577|237830622|4909|(Target-AID;+;@18;NG;ACT:ATT;T:I;)	ENST00000366574	4909	I	CACTTTACAGGAGCACAACTTG
ENST00000366574|1|+|237830577|237830622|4909|(Target-AID;+;@19;NG;ACT:ATT;T:I;)	ENST00000366574	4909	I	ACTTTACAGGAGCACAACTTGG
ENST00000366574|1|+|237830577|237830622|4909|(Target-AID;+;@18;NGG;ACT:ATT;T:I;)	ENST00000366574	4909	I	CACTTTACAGGAGCACAACTTGG
ENST00000366574|1|+|237832569|237832614|4950|(ABE;+;@13;NG;GAA:GGA;E:G;)	ENST00000366574	4950	G	TGTTGGGAATTTTTCCCAGCAG
ENST00000366574|1|+|237832569|237832614|4950|(ABE;+;@13;NGG;GAA:GGA;E:G;)	ENST00000366574	4950	G	TGTTGGGAATTTTTCCCAGCAGG
ENST00000366574|1|+|237832596|237832641|4959|(Target-AID;-;@19;NG;CGG:CAG;R:Q;)	ENST00000366574	4959	Q	CCGGAAGCAATCCCCTGCTGGG
ENST00000319653|1|+|240092634|240092679|183|(ABE;+;@16;NG;ATC:GTC;I:V;)	ENST00000319653	183	V	GGACATCTATAGCTTCCATTCG
ENST00000319653|1|+|240092634|240092679|183|(ABE;+;@16;NGG;ATC:GTC;I:V;)	ENST00000319653	183	V	GGACATCTATAGCTTCCATTCGG
ENST00000366541|1|+|243271000|243271045|89|(ABE;-;@16;NG;AGT:AGC;S:S;)	ENST00000366541	89	S	CTTCACTTTCCTTATCTGCTTG
ENST00000358704|1|+|244053912|244053957|54|(ABE;-;@13;NG;TGC:CGC;C:R;)	ENST00000358704	54	R	ATGCTGCATGAAGCCAGTACAG
ENST00000622512|1|+|244053912|244053957|45|(ABE;-;@13;NG;TGC:CGC;C:R;)	ENST00000622512	45	R	ATGCTGCATGAAGCCAGTACAG
ENST00000336119|1|+|247424019|247424064|200|(Target-AID;-;@18;NGG;GTG:ATG;V:M;)	ENST00000336119	200	M	CACGGGGCTCTCACACGTCTTGG
ENST00000336119|1|+|247424019|247424064|200|(Target-AID;-;@19;NG;GTG:ATG;V:M;)	ENST00000336119	200	M	ACGGGGCTCTCACACGTCTTGG
ENST00000336119|1|+|247424019|247424064|200|(Target-AID;-;@18;NG;GTG:ATG;V:M;)	ENST00000336119	200	M	CACGGGGCTCTCACACGTCTTG
ENST00000348069|1|+|247424019|247424064|200|(Target-AID;-;@18;NGG;GTG:ATG;V:M;)	ENST00000348069	200	M	CACGGGGCTCTCACACGTCTTGG
ENST00000348069|1|+|247424019|247424064|200|(Target-AID;-;@19;NG;GTG:ATG;V:M;)	ENST00000348069	200	M	ACGGGGCTCTCACACGTCTTGG
ENST00000348069|1|+|247424019|247424064|200|(Target-AID;-;@18;NG;GTG:ATG;V:M;)	ENST00000348069	200	M	CACGGGGCTCTCACACGTCTTG
ENST00000366496|1|+|247424019|247424064|200|(Target-AID;-;@18;NGG;GTG:ATG;V:M;)	ENST00000366496	200	M	CACGGGGCTCTCACACGTCTTGG
ENST00000366496|1|+|247424019|247424064|200|(Target-AID;-;@19;NG;GTG:ATG;V:M;)	ENST00000366496	200	M	ACGGGGCTCTCACACGTCTTGG
ENST00000366496|1|+|247424019|247424064|200|(Target-AID;-;@18;NG;GTG:ATG;V:M;)	ENST00000366496	200	M	CACGGGGCTCTCACACGTCTTG
ENST00000366497|1|+|247424019|247424064|200|(Target-AID;-;@18;NGG;GTG:ATG;V:M;)	ENST00000366497	200	M	CACGGGGCTCTCACACGTCTTGG
ENST00000366497|1|+|247424019|247424064|200|(Target-AID;-;@19;NG;GTG:ATG;V:M;)	ENST00000366497	200	M	ACGGGGCTCTCACACGTCTTGG
ENST00000366497|1|+|247424019|247424064|200|(Target-AID;-;@18;NG;GTG:ATG;V:M;)	ENST00000366497	200	M	CACGGGGCTCTCACACGTCTTG
ENST00000391827|1|+|247424019|247424064|200|(Target-AID;-;@18;NGG;GTG:ATG;V:M;)	ENST00000391827	200	M	CACGGGGCTCTCACACGTCTTGG
ENST00000391827|1|+|247424019|247424064|200|(Target-AID;-;@19;NG;GTG:ATG;V:M;)	ENST00000391827	200	M	ACGGGGCTCTCACACGTCTTGG
ENST00000391827|1|+|247424019|247424064|200|(Target-AID;-;@18;NG;GTG:ATG;V:M;)	ENST00000391827	200	M	CACGGGGCTCTCACACGTCTTG
ENST00000391828|1|+|247424019|247424064|200|(Target-AID;-;@18;NGG;GTG:ATG;V:M;)	ENST00000391828	200	M	CACGGGGCTCTCACACGTCTTGG
ENST00000391828|1|+|247424019|247424064|200|(Target-AID;-;@19;NG;GTG:ATG;V:M;)	ENST00000391828	200	M	ACGGGGCTCTCACACGTCTTGG
ENST00000391828|1|+|247424019|247424064|200|(Target-AID;-;@18;NG;GTG:ATG;V:M;)	ENST00000391828	200	M	CACGGGGCTCTCACACGTCTTG
ENST00000474792|1|+|247424019|247424064|200|(Target-AID;-;@18;NGG;GTG:ATG;V:M;)	ENST00000474792	200	M	CACGGGGCTCTCACACGTCTTGG
ENST00000474792|1|+|247424019|247424064|200|(Target-AID;-;@19;NG;GTG:ATG;V:M;)	ENST00000474792	200	M	ACGGGGCTCTCACACGTCTTGG
ENST00000474792|1|+|247424019|247424064|200|(Target-AID;-;@18;NG;GTG:ATG;V:M;)	ENST00000474792	200	M	CACGGGGCTCTCACACGTCTTG
ENST00000643234|1|+|247424019|247424064|200|(Target-AID;-;@18;NGG;GTG:ATG;V:M;)	ENST00000643234	200	M	CACGGGGCTCTCACACGTCTTGG
ENST00000643234|1|+|247424019|247424064|200|(Target-AID;-;@19;NG;GTG:ATG;V:M;)	ENST00000643234	200	M	ACGGGGCTCTCACACGTCTTGG
ENST00000643234|1|+|247424019|247424064|200|(Target-AID;-;@18;NG;GTG:ATG;V:M;)	ENST00000643234	200	M	CACGGGGCTCTCACACGTCTTG
ENST00000336119|1|+|247424334|247424379|305|(Target-AID;-;@18;NG;GAT:AAT;D:N;)	ENST00000336119	305	N	ATCGAAGCCGTCCATGAGGAAG
ENST00000348069|1|+|247424334|247424379|305|(Target-AID;-;@18;NG;GAT:AAT;D:N;)	ENST00000348069	305	N	ATCGAAGCCGTCCATGAGGAAG
ENST00000366496|1|+|247424334|247424379|305|(Target-AID;-;@18;NG;GAT:AAT;D:N;)	ENST00000366496	305	N	ATCGAAGCCGTCCATGAGGAAG
ENST00000366497|1|+|247424334|247424379|305|(Target-AID;-;@18;NG;GAT:AAT;D:N;)	ENST00000366497	305	N	ATCGAAGCCGTCCATGAGGAAG
ENST00000391827|1|+|247424334|247424379|305|(Target-AID;-;@18;NG;GAT:AAT;D:N;)	ENST00000391827	305	N	ATCGAAGCCGTCCATGAGGAAG
ENST00000391828|1|+|247424334|247424379|305|(Target-AID;-;@18;NG;GAT:AAT;D:N;)	ENST00000391828	305	N	ATCGAAGCCGTCCATGAGGAAG
ENST00000474792|1|+|247424334|247424379|305|(Target-AID;-;@18;NG;GAT:AAT;D:N;)	ENST00000474792	305	N	ATCGAAGCCGTCCATGAGGAAG
ENST00000643234|1|+|247424334|247424379|305|(Target-AID;-;@18;NG;GAT:AAT;D:N;)	ENST00000643234	305	N	ATCGAAGCCGTCCATGAGGAAG
ENST00000336119|1|+|247424337|247424382|306|(Target-AID;-;@18;NG;GAG:AAG;E:K;)	ENST00000336119	306	K	CTCATCGAAGCCGTCCATGAGG
ENST00000348069|1|+|247424337|247424382|306|(Target-AID;-;@18;NG;GAG:AAG;E:K;)	ENST00000348069	306	K	CTCATCGAAGCCGTCCATGAGG
ENST00000366496|1|+|247424337|247424382|306|(Target-AID;-;@18;NG;GAG:AAG;E:K;)	ENST00000366496	306	K	CTCATCGAAGCCGTCCATGAGG
ENST00000366497|1|+|247424337|247424382|306|(Target-AID;-;@18;NG;GAG:AAG;E:K;)	ENST00000366497	306	K	CTCATCGAAGCCGTCCATGAGG
ENST00000391827|1|+|247424337|247424382|306|(Target-AID;-;@18;NG;GAG:AAG;E:K;)	ENST00000391827	306	K	CTCATCGAAGCCGTCCATGAGG
ENST00000391828|1|+|247424337|247424382|306|(Target-AID;-;@18;NG;GAG:AAG;E:K;)	ENST00000391828	306	K	CTCATCGAAGCCGTCCATGAGG
ENST00000474792|1|+|247424337|247424382|306|(Target-AID;-;@18;NG;GAG:AAG;E:K;)	ENST00000474792	306	K	CTCATCGAAGCCGTCCATGAGG
ENST00000643234|1|+|247424337|247424382|306|(Target-AID;-;@18;NG;GAG:AAG;E:K;)	ENST00000643234	306	K	CTCATCGAAGCCGTCCATGAGG
ENST00000336119|1|+|247424340|247424385|307|(ABE;-;@13;NG;CTG:CCG;L:P;)	ENST00000336119	307	P	ACCTTGCAGCTCATCGAAGCCG
ENST00000348069|1|+|247424340|247424385|307|(ABE;-;@13;NG;CTG:CCG;L:P;)	ENST00000348069	307	P	ACCTTGCAGCTCATCGAAGCCG
ENST00000366496|1|+|247424340|247424385|307|(ABE;-;@13;NG;CTG:CCG;L:P;)	ENST00000366496	307	P	ACCTTGCAGCTCATCGAAGCCG
ENST00000366497|1|+|247424340|247424385|307|(ABE;-;@13;NG;CTG:CCG;L:P;)	ENST00000366497	307	P	ACCTTGCAGCTCATCGAAGCCG
ENST00000391827|1|+|247424340|247424385|307|(ABE;-;@13;NG;CTG:CCG;L:P;)	ENST00000391827	307	P	ACCTTGCAGCTCATCGAAGCCG
ENST00000391828|1|+|247424340|247424385|307|(ABE;-;@13;NG;CTG:CCG;L:P;)	ENST00000391828	307	P	ACCTTGCAGCTCATCGAAGCCG
ENST00000474792|1|+|247424340|247424385|307|(ABE;-;@13;NG;CTG:CCG;L:P;)	ENST00000474792	307	P	ACCTTGCAGCTCATCGAAGCCG
ENST00000643234|1|+|247424340|247424385|307|(ABE;-;@13;NG;CTG:CCG;L:P;)	ENST00000643234	307	P	ACCTTGCAGCTCATCGAAGCCG
ENST00000336119|1|+|247424469|247424514|350|(Target-AID;+;@18;NG;ACG:ATG;T:M;)	ENST00000336119	350	M	CACGAGACCTGTGGCCCTGGAG
ENST00000348069|1|+|247424469|247424514|350|(Target-AID;+;@18;NG;ACG:ATG;T:M;)	ENST00000348069	350	M	CACGAGACCTGTGGCCCTGGAG
ENST00000366496|1|+|247424469|247424514|350|(Target-AID;+;@18;NG;ACG:ATG;T:M;)	ENST00000366496	350	M	CACGAGACCTGTGGCCCTGGAG
ENST00000366497|1|+|247424469|247424514|350|(Target-AID;+;@18;NG;ACG:ATG;T:M;)	ENST00000366497	350	M	CACGAGACCTGTGGCCCTGGAG
ENST00000391827|1|+|247424469|247424514|350|(Target-AID;+;@18;NG;ACG:ATG;T:M;)	ENST00000391827	350	M	CACGAGACCTGTGGCCCTGGAG
ENST00000391828|1|+|247424469|247424514|350|(Target-AID;+;@18;NG;ACG:ATG;T:M;)	ENST00000391828	350	M	CACGAGACCTGTGGCCCTGGAG
ENST00000474792|1|+|247424469|247424514|350|(Target-AID;+;@18;NG;ACG:ATG;T:M;)	ENST00000474792	350	M	CACGAGACCTGTGGCCCTGGAG
ENST00000643234|1|+|247424469|247424514|350|(Target-AID;+;@18;NG;ACG:ATG;T:M;)	ENST00000643234	350	M	CACGAGACCTGTGGCCCTGGAG
ENST00000336119|1|+|247424484|247424529|355|(ABE;-;@16;NGG;CTG:CCG;L:P;)	ENST00000336119	355	P	CTCCAGGGCCACAGGTCTCGTGG
ENST00000336119|1|+|247424484|247424529|355|(ABE;-;@17;NG;CTG:CCG;L:P;)	ENST00000336119	355	P	TCCAGGGCCACAGGTCTCGTGG
ENST00000336119|1|+|247424484|247424529|355|(ABE;-;@16;NG;CTG:CCG;L:P;)	ENST00000336119	355	P	CTCCAGGGCCACAGGTCTCGTG
ENST00000336119|1|+|247424484|247424529|355|(ABE;-;@14;NG;CTG:CCG;L:P;)	ENST00000336119	355	P	TTCTCCAGGGCCACAGGTCTCG
ENST00000348069|1|+|247424484|247424529|355|(ABE;-;@16;NGG;CTG:CCG;L:P;)	ENST00000348069	355	P	CTCCAGGGCCACAGGTCTCGTGG
ENST00000348069|1|+|247424484|247424529|355|(ABE;-;@17;NG;CTG:CCG;L:P;)	ENST00000348069	355	P	TCCAGGGCCACAGGTCTCGTGG
ENST00000348069|1|+|247424484|247424529|355|(ABE;-;@16;NG;CTG:CCG;L:P;)	ENST00000348069	355	P	CTCCAGGGCCACAGGTCTCGTG
ENST00000348069|1|+|247424484|247424529|355|(ABE;-;@14;NG;CTG:CCG;L:P;)	ENST00000348069	355	P	TTCTCCAGGGCCACAGGTCTCG
ENST00000366496|1|+|247424484|247424529|355|(ABE;-;@16;NGG;CTG:CCG;L:P;)	ENST00000366496	355	P	CTCCAGGGCCACAGGTCTCGTGG
ENST00000366496|1|+|247424484|247424529|355|(ABE;-;@17;NG;CTG:CCG;L:P;)	ENST00000366496	355	P	TCCAGGGCCACAGGTCTCGTGG
ENST00000366496|1|+|247424484|247424529|355|(ABE;-;@16;NG;CTG:CCG;L:P;)	ENST00000366496	355	P	CTCCAGGGCCACAGGTCTCGTG
ENST00000366496|1|+|247424484|247424529|355|(ABE;-;@14;NG;CTG:CCG;L:P;)	ENST00000366496	355	P	TTCTCCAGGGCCACAGGTCTCG
ENST00000366497|1|+|247424484|247424529|355|(ABE;-;@16;NGG;CTG:CCG;L:P;)	ENST00000366497	355	P	CTCCAGGGCCACAGGTCTCGTGG
ENST00000366497|1|+|247424484|247424529|355|(ABE;-;@17;NG;CTG:CCG;L:P;)	ENST00000366497	355	P	TCCAGGGCCACAGGTCTCGTGG
ENST00000366497|1|+|247424484|247424529|355|(ABE;-;@16;NG;CTG:CCG;L:P;)	ENST00000366497	355	P	CTCCAGGGCCACAGGTCTCGTG
ENST00000366497|1|+|247424484|247424529|355|(ABE;-;@14;NG;CTG:CCG;L:P;)	ENST00000366497	355	P	TTCTCCAGGGCCACAGGTCTCG
ENST00000391827|1|+|247424484|247424529|355|(ABE;-;@16;NGG;CTG:CCG;L:P;)	ENST00000391827	355	P	CTCCAGGGCCACAGGTCTCGTGG
ENST00000391827|1|+|247424484|247424529|355|(ABE;-;@17;NG;CTG:CCG;L:P;)	ENST00000391827	355	P	TCCAGGGCCACAGGTCTCGTGG
ENST00000391827|1|+|247424484|247424529|355|(ABE;-;@16;NG;CTG:CCG;L:P;)	ENST00000391827	355	P	CTCCAGGGCCACAGGTCTCGTG
ENST00000391827|1|+|247424484|247424529|355|(ABE;-;@14;NG;CTG:CCG;L:P;)	ENST00000391827	355	P	TTCTCCAGGGCCACAGGTCTCG
ENST00000391828|1|+|247424484|247424529|355|(ABE;-;@16;NGG;CTG:CCG;L:P;)	ENST00000391828	355	P	CTCCAGGGCCACAGGTCTCGTGG
ENST00000391828|1|+|247424484|247424529|355|(ABE;-;@17;NG;CTG:CCG;L:P;)	ENST00000391828	355	P	TCCAGGGCCACAGGTCTCGTGG
ENST00000391828|1|+|247424484|247424529|355|(ABE;-;@16;NG;CTG:CCG;L:P;)	ENST00000391828	355	P	CTCCAGGGCCACAGGTCTCGTG
ENST00000391828|1|+|247424484|247424529|355|(ABE;-;@14;NG;CTG:CCG;L:P;)	ENST00000391828	355	P	TTCTCCAGGGCCACAGGTCTCG
ENST00000474792|1|+|247424484|247424529|355|(ABE;-;@16;NGG;CTG:CCG;L:P;)	ENST00000474792	355	P	CTCCAGGGCCACAGGTCTCGTGG
ENST00000474792|1|+|247424484|247424529|355|(ABE;-;@17;NG;CTG:CCG;L:P;)	ENST00000474792	355	P	TCCAGGGCCACAGGTCTCGTGG
ENST00000474792|1|+|247424484|247424529|355|(ABE;-;@16;NG;CTG:CCG;L:P;)	ENST00000474792	355	P	CTCCAGGGCCACAGGTCTCGTG
ENST00000474792|1|+|247424484|247424529|355|(ABE;-;@14;NG;CTG:CCG;L:P;)	ENST00000474792	355	P	TTCTCCAGGGCCACAGGTCTCG
ENST00000643234|1|+|247424484|247424529|355|(ABE;-;@16;NGG;CTG:CCG;L:P;)	ENST00000643234	355	P	CTCCAGGGCCACAGGTCTCGTGG
ENST00000643234|1|+|247424484|247424529|355|(ABE;-;@17;NG;CTG:CCG;L:P;)	ENST00000643234	355	P	TCCAGGGCCACAGGTCTCGTGG
ENST00000643234|1|+|247424484|247424529|355|(ABE;-;@16;NG;CTG:CCG;L:P;)	ENST00000643234	355	P	CTCCAGGGCCACAGGTCTCGTG
ENST00000643234|1|+|247424484|247424529|355|(ABE;-;@14;NG;CTG:CCG;L:P;)	ENST00000643234	355	P	TTCTCCAGGGCCACAGGTCTCG
ENST00000336119|1|+|247425225|247425270|602|(ABE;+;@13;NG;CAG:CGG;Q:R;)	ENST00000336119	602	R	ATCTCTCAGCAAATCAGGCTGG
ENST00000336119|1|+|247425225|247425270|602|(ABE;+;@15;NG;CAG:CGG;Q:R;)	ENST00000336119	602	R	CTCTCAGCAAATCAGGCTGGAG
ENST00000348069|1|+|247425225|247425270|602|(ABE;+;@13;NG;CAG:CGG;Q:R;)	ENST00000348069	602	R	ATCTCTCAGCAAATCAGGCTGG
ENST00000348069|1|+|247425225|247425270|602|(ABE;+;@15;NG;CAG:CGG;Q:R;)	ENST00000348069	602	R	CTCTCAGCAAATCAGGCTGGAG
ENST00000366496|1|+|247425225|247425270|602|(ABE;+;@13;NG;CAG:CGG;Q:R;)	ENST00000366496	602	R	ATCTCTCAGCAAATCAGGCTGG
ENST00000366496|1|+|247425225|247425270|602|(ABE;+;@15;NG;CAG:CGG;Q:R;)	ENST00000366496	602	R	CTCTCAGCAAATCAGGCTGGAG
ENST00000366497|1|+|247425225|247425270|602|(ABE;+;@13;NG;CAG:CGG;Q:R;)	ENST00000366497	602	R	ATCTCTCAGCAAATCAGGCTGG
ENST00000366497|1|+|247425225|247425270|602|(ABE;+;@15;NG;CAG:CGG;Q:R;)	ENST00000366497	602	R	CTCTCAGCAAATCAGGCTGGAG
ENST00000391827|1|+|247425225|247425270|602|(ABE;+;@13;NG;CAG:CGG;Q:R;)	ENST00000391827	602	R	ATCTCTCAGCAAATCAGGCTGG
ENST00000391827|1|+|247425225|247425270|602|(ABE;+;@15;NG;CAG:CGG;Q:R;)	ENST00000391827	602	R	CTCTCAGCAAATCAGGCTGGAG
ENST00000391828|1|+|247425225|247425270|602|(ABE;+;@13;NG;CAG:CGG;Q:R;)	ENST00000391828	602	R	ATCTCTCAGCAAATCAGGCTGG
ENST00000391828|1|+|247425225|247425270|602|(ABE;+;@15;NG;CAG:CGG;Q:R;)	ENST00000391828	602	R	CTCTCAGCAAATCAGGCTGGAG
ENST00000474792|1|+|247425225|247425270|602|(ABE;+;@13;NG;CAG:CGG;Q:R;)	ENST00000474792	602	R	ATCTCTCAGCAAATCAGGCTGG
ENST00000474792|1|+|247425225|247425270|602|(ABE;+;@15;NG;CAG:CGG;Q:R;)	ENST00000474792	602	R	CTCTCAGCAAATCAGGCTGGAG
ENST00000643234|1|+|247425225|247425270|602|(ABE;+;@13;NG;CAG:CGG;Q:R;)	ENST00000643234	602	R	ATCTCTCAGCAAATCAGGCTGG
ENST00000643234|1|+|247425225|247425270|602|(ABE;+;@15;NG;CAG:CGG;Q:R;)	ENST00000643234	602	R	CTCTCAGCAAATCAGGCTGGAG
ENST00000336119|1|+|247436030|247436075|861|(ABE;+;@13;NG;TAT:TGT;Y:C;)	ENST00000336119	861	C	AGACTCTATGTGGGGGAGAATG
ENST00000391827|1|+|247436030|247436075|804|(ABE;+;@13;NG;TAT:TGT;Y:C;)	ENST00000391827	804	C	AGACTCTATGTGGGGGAGAATG
ENST00000391828|1|+|247436030|247436075|861|(ABE;+;@13;NG;TAT:TGT;Y:C;)	ENST00000391828	861	C	AGACTCTATGTGGGGGAGAATG
ENST00000643234|1|+|247436030|247436075|841|(ABE;+;@13;NG;TAT:TGT;Y:C;)	ENST00000643234	841	C	AGACTCTATGTGGGGGAGAATG
ENST00000374338|1|+|25543740|25543785|22|(Target-AID;-;@19;NGG;TGG:TAG;W:*;)	ENST00000374338	22	*	CCAGCTCTGCTTGGCCAAGCTGG
ENST00000374338|1|+|25543740|25543785|22|(Target-AID;-;@19;NG;TGG:TAG;W:*;)	ENST00000374338	22	*	CCAGCTCTGCTTGGCCAAGCTG
ENST00000374338|1|+|25557192|25557237|136|(Target-AID;+;@19;NG;CAG:TAG;Q:*;)	ENST00000374338	136	*	CCAGCACAACCAGAGCCTCGAG
ENST00000374338|1|+|25563734|25563779|238|(Target-AID;+;@18;NG;CGG:TGG;R:W;)	ENST00000374338	238	W	CGCGGCCACAAGCCTTGAGTGG
ENST00000354177|1|+|25800209|25800254|1|(ABE;+;@16;NG;ATG:GTG;M:V;)	ENST00000354177	1	V	AGCCATGGGCCGGGCCCGGCCG
ENST00000354177|1|+|25800209|25800254|1|(ABE;+;@17;NG;ATG:GTG;M:V;)	ENST00000354177	1	V	GCCATGGGCCGGGCCCGGCCGG
ENST00000354177|1|+|25800209|25800254|1|(ABE;+;@16;NGG;ATG:GTG;M:V;)	ENST00000354177	1	V	AGCCATGGGCCGGGCCCGGCCGG
ENST00000354177|1|+|25800209|25800254|1|(ABE;+;@17;NGG;ATG:GTG;M:V;)	ENST00000354177	1	V	GCCATGGGCCGGGCCCGGCCGGG
ENST00000361547|1|+|25800209|25800254|1|(ABE;+;@16;NG;ATG:GTG;M:V;)	ENST00000361547	1	V	AGCCATGGGCCGGGCCCGGCCG
ENST00000361547|1|+|25800209|25800254|1|(ABE;+;@17;NG;ATG:GTG;M:V;)	ENST00000361547	1	V	GCCATGGGCCGGGCCCGGCCGG
ENST00000361547|1|+|25800209|25800254|1|(ABE;+;@16;NGG;ATG:GTG;M:V;)	ENST00000361547	1	V	AGCCATGGGCCGGGCCCGGCCGG
ENST00000361547|1|+|25800209|25800254|1|(ABE;+;@17;NGG;ATG:GTG;M:V;)	ENST00000361547	1	V	GCCATGGGCCGGGCCCGGCCGGG
ENST00000374315|1|+|25800209|25800254|1|(ABE;+;@16;NG;ATG:GTG;M:V;)	ENST00000374315	1	V	AGCCATGGGCCGGGCCCGGCCG
ENST00000374315|1|+|25800209|25800254|1|(ABE;+;@17;NG;ATG:GTG;M:V;)	ENST00000374315	1	V	GCCATGGGCCGGGCCCGGCCGG
ENST00000374315|1|+|25800209|25800254|1|(ABE;+;@16;NGG;ATG:GTG;M:V;)	ENST00000374315	1	V	AGCCATGGGCCGGGCCCGGCCGG
ENST00000374315|1|+|25800209|25800254|1|(ABE;+;@17;NGG;ATG:GTG;M:V;)	ENST00000374315	1	V	GCCATGGGCCGGGCCCGGCCGGG
ENST00000354177|1|+|25805125|25805170|103|(ABE;+;@17;NG;ACT:GCT;T:A;)	ENST00000354177	103	A	TCAACTCCCGCGGCCAGCTGCG
ENST00000361547|1|+|25805125|25805170|137|(ABE;+;@17;NG;ACT:GCT;T:A;)	ENST00000361547	137	A	TCAACTCCCGCGGCCAGCTGCG
ENST00000374315|1|+|25805125|25805170|103|(ABE;+;@17;NG;ACT:GCT;T:A;)	ENST00000374315	103	A	TCAACTCCCGCGGCCAGCTGCG
ENST00000354177|1|+|25805179|25805224|121|(Target-AID;-;@19;NGG;ACG:ACA;T:T;)	ENST00000354177	121	T	GCGTCTCCTCGCTAGGGTCAGGG
ENST00000354177|1|+|25805179|25805224|121|(Target-AID;-;@18;NGG;ACG:ACA;T:T;)	ENST00000354177	121	T	AGCGTCTCCTCGCTAGGGTCAGG
ENST00000354177|1|+|25805179|25805224|121|(Target-AID;-;@19;NG;ACG:ACA;T:T;)	ENST00000354177	121	T	GCGTCTCCTCGCTAGGGTCAGG
ENST00000354177|1|+|25805179|25805224|121|(Target-AID;-;@18;NG;ACG:ACA;T:T;)	ENST00000354177	121	T	AGCGTCTCCTCGCTAGGGTCAG
ENST00000361547|1|+|25805179|25805224|155|(Target-AID;-;@19;NGG;ACG:ACA;T:T;)	ENST00000361547	155	T	GCGTCTCCTCGCTAGGGTCAGGG
ENST00000361547|1|+|25805179|25805224|155|(Target-AID;-;@18;NGG;ACG:ACA;T:T;)	ENST00000361547	155	T	AGCGTCTCCTCGCTAGGGTCAGG
ENST00000361547|1|+|25805179|25805224|155|(Target-AID;-;@19;NG;ACG:ACA;T:T;)	ENST00000361547	155	T	GCGTCTCCTCGCTAGGGTCAGG
ENST00000361547|1|+|25805179|25805224|155|(Target-AID;-;@18;NG;ACG:ACA;T:T;)	ENST00000361547	155	T	AGCGTCTCCTCGCTAGGGTCAG
ENST00000374315|1|+|25805179|25805224|121|(Target-AID;-;@19;NGG;ACG:ACA;T:T;)	ENST00000374315	121	T	GCGTCTCCTCGCTAGGGTCAGGG
ENST00000374315|1|+|25805179|25805224|121|(Target-AID;-;@18;NGG;ACG:ACA;T:T;)	ENST00000374315	121	T	AGCGTCTCCTCGCTAGGGTCAGG
ENST00000374315|1|+|25805179|25805224|121|(Target-AID;-;@19;NG;ACG:ACA;T:T;)	ENST00000374315	121	T	GCGTCTCCTCGCTAGGGTCAGG
ENST00000374315|1|+|25805179|25805224|121|(Target-AID;-;@18;NG;ACG:ACA;T:T;)	ENST00000374315	121	T	AGCGTCTCCTCGCTAGGGTCAG
ENST00000354177|1|+|25808603|25808648|161|(Target-AID;-;@17;NGG;GCC:ACC;A:T;)	ENST00000354177	161	T	AGGCGGCGGCTGTCCAGTTTCGG
ENST00000354177|1|+|25808603|25808648|161|(Target-AID;-;@18;NG;GCC:ACC;A:T;)	ENST00000354177	161	T	GGCGGCGGCTGTCCAGTTTCGG
ENST00000354177|1|+|25808603|25808648|161|(Target-AID;-;@17;NG;GCC:ACC;A:T;)	ENST00000354177	161	T	AGGCGGCGGCTGTCCAGTTTCG
ENST00000361547|1|+|25808603|25808648|195|(Target-AID;-;@17;NGG;GCC:ACC;A:T;)	ENST00000361547	195	T	AGGCGGCGGCTGTCCAGTTTCGG
ENST00000361547|1|+|25808603|25808648|195|(Target-AID;-;@18;NG;GCC:ACC;A:T;)	ENST00000361547	195	T	GGCGGCGGCTGTCCAGTTTCGG
ENST00000361547|1|+|25808603|25808648|195|(Target-AID;-;@17;NG;GCC:ACC;A:T;)	ENST00000361547	195	T	AGGCGGCGGCTGTCCAGTTTCG
ENST00000374315|1|+|25808603|25808648|161|(Target-AID;-;@17;NGG;GCC:ACC;A:T;)	ENST00000374315	161	T	AGGCGGCGGCTGTCCAGTTTCGG
ENST00000374315|1|+|25808603|25808648|161|(Target-AID;-;@18;NG;GCC:ACC;A:T;)	ENST00000374315	161	T	GGCGGCGGCTGTCCAGTTTCGG
ENST00000374315|1|+|25808603|25808648|161|(Target-AID;-;@17;NG;GCC:ACC;A:T;)	ENST00000374315	161	T	AGGCGGCGGCTGTCCAGTTTCG
ENST00000354177|1|+|25808747|25808792|209|(Target-AID;-;@17;NG;CCG:CCA;P:P;)	ENST00000354177	209	P	CGGCGGTGGATAGAAGCGGTTG
ENST00000361547|1|+|25808747|25808792|243|(Target-AID;-;@17;NG;CCG:CCA;P:P;)	ENST00000361547	243	P	CGGCGGTGGATAGAAGCGGTTG
ENST00000374315|1|+|25808747|25808792|209|(Target-AID;-;@17;NG;CCG:CCA;P:P;)	ENST00000374315	209	P	CGGCGGTGGATAGAAGCGGTTG
ENST00000354177|1|+|25809665|25809710|259|(ABE;+;@17;NG;CAT:CGT;H:R;)	ENST00000354177	259	R	TCCATGCCGAGTTCCAGCTCAG
ENST00000361547|1|+|25809665|25809710|293|(ABE;+;@17;NG;CAT:CGT;H:R;)	ENST00000361547	293	R	TCCATGCCGAGTTCCAGCTCAG
ENST00000374315|1|+|25809665|25809710|259|(ABE;+;@17;NG;CAT:CGT;H:R;)	ENST00000374315	259	R	TCCATGCCGAGTTCCAGCTCAG
ENST00000354177|1|+|25812698|25812743|405|(Target-AID;+;@19;NG;CGA:TGA;R:*;)	ENST00000354177	405	*	CCGAGCCAAGGCTGAGAACAAG
ENST00000361547|1|+|25812698|25812743|439|(Target-AID;+;@19;NG;CGA:TGA;R:*;)	ENST00000361547	439	*	CCGAGCCAAGGCTGAGAACAAG
ENST00000374315|1|+|25812698|25812743|405|(Target-AID;+;@19;NG;CGA:TGA;R:*;)	ENST00000374315	405	*	CCGAGCCAAGGCTGAGAACAAG
ENST00000354177|1|+|25813939|25813984|456|(Target-AID;-;@19;NG;TGG:TAG;W:*;)	ENST00000354177	456	*	CCAGGTGCTGATGAAGCTCTCG
ENST00000361547|1|+|25813939|25813984|490|(Target-AID;-;@19;NG;TGG:TAG;W:*;)	ENST00000361547	490	*	CCAGGTGCTGATGAAGCTCTCG
ENST00000374315|1|+|25813939|25813984|456|(Target-AID;-;@19;NG;TGG:TAG;W:*;)	ENST00000374315	456	*	CCAGGTGCTGATGAAGCTCTCG
ENST00000324856|1|+|26731565|26731610|596|(Target-AID;-;@17;NG;CGC:CAC;R:H;)	ENST00000324856	596	H	AAGCGCTGCTGGGAATAGGCAG
ENST00000374152|1|+|26731565|26731610|213|(Target-AID;-;@17;NG;CGC:CAC;R:H;)	ENST00000374152	213	H	AAGCGCTGCTGGGAATAGGCAG
ENST00000430799|1|+|26731565|26731610|213|(Target-AID;-;@17;NG;CGC:CAC;R:H;)	ENST00000430799	213	H	AAGCGCTGCTGGGAATAGGCAG
ENST00000457599|1|+|26731565|26731610|596|(Target-AID;-;@17;NG;CGC:CAC;R:H;)	ENST00000457599	596	H	AAGCGCTGCTGGGAATAGGCAG
ENST00000615191|1|+|26731565|26731610|213|(Target-AID;-;@17;NG;CGC:CAC;R:H;)	ENST00000615191	213	H	AAGCGCTGCTGGGAATAGGCAG
ENST00000078527|1|+|26794625|26794670|205|(ABE;+;@17;NG;AAC:AGC;N:S;)	ENST00000078527	205	S	CCAACGGGCTGGTCAGTGTTGG
ENST00000374145|1|+|26794625|26794670|205|(ABE;+;@17;NG;AAC:AGC;N:S;)	ENST00000374145	205	S	CCAACGGGCTGGTCAGTGTTGG
ENST00000078527|1|+|26797754|26797799|472|(ABE;-;@13;NG;CTA:CCA;L:P;)	ENST00000078527	472	P	GTAGCCTAGAATGTATCGTGTG
ENST00000374145|1|+|26797754|26797799|472|(ABE;-;@13;NG;CTA:CCA;L:P;)	ENST00000374145	472	P	GTAGCCTAGAATGTATCGTGTG
ENST00000343067|1|+|28993467|28993512|210|(ABE;-;@16;NG;ATG:ACG;M:T;)	ENST00000343067	210	T	GTGCATGTTCCTGTGTTTTCTG
ENST00000347529|1|+|28993467|28993512|210|(ABE;-;@16;NG;ATG:ACG;M:T;)	ENST00000347529	210	T	GTGCATGTTCCTGTGTTTTCTG
ENST00000349460|1|+|28993467|28993512|210|(ABE;-;@16;NG;ATG:ACG;M:T;)	ENST00000349460	210	T	GTGCATGTTCCTGTGTTTTCTG
ENST00000356093|1|+|28993467|28993512|1|(ABE;-;@16;NG;ATG:ACG;M:T;)	ENST00000356093	1	T	GTGCATGTTCCTGTGTTTTCTG
ENST00000373797|1|+|28993467|28993512|210|(ABE;-;@16;NG;ATG:ACG;M:T;)	ENST00000373797	210	T	GTGCATGTTCCTGTGTTTTCTG
ENST00000373798|1|+|28993467|28993512|210|(ABE;-;@16;NG;ATG:ACG;M:T;)	ENST00000373798	210	T	GTGCATGTTCCTGTGTTTTCTG
ENST00000373800|1|+|28993467|28993512|1|(ABE;-;@16;NG;ATG:ACG;M:T;)	ENST00000373800	1	T	GTGCATGTTCCTGTGTTTTCTG
ENST00000642260|1|+|28993467|28993512|1|(ABE;-;@16;NG;ATG:ACG;M:T;)	ENST00000642260	1	T	GTGCATGTTCCTGTGTTTTCTG
ENST00000642937|1|+|28993467|28993512|1|(ABE;-;@16;NG;ATG:ACG;M:T;)	ENST00000642937	1	T	GTGCATGTTCCTGTGTTTTCTG
ENST00000643173|1|+|28993467|28993512|210|(ABE;-;@16;NG;ATG:ACG;M:T;)	ENST00000643173	210	T	GTGCATGTTCCTGTGTTTTCTG
ENST00000643604|1|+|28993467|28993512|210|(ABE;-;@16;NG;ATG:ACG;M:T;)	ENST00000643604	210	T	GTGCATGTTCCTGTGTTTTCTG
ENST00000644342|1|+|28993467|28993512|1|(ABE;-;@16;NG;ATG:ACG;M:T;)	ENST00000644342	1	T	GTGCATGTTCCTGTGTTTTCTG
ENST00000644600|1|+|28993467|28993512|210|(ABE;-;@16;NG;ATG:ACG;M:T;)	ENST00000644600	210	T	GTGCATGTTCCTGTGTTTTCTG
ENST00000645184|1|+|28993467|28993512|210|(ABE;-;@16;NG;ATG:ACG;M:T;)	ENST00000645184	210	T	GTGCATGTTCCTGTGTTTTCTG
ENST00000646189|1|+|28993467|28993512|1|(ABE;-;@16;NG;ATG:ACG;M:T;)	ENST00000646189	1	T	GTGCATGTTCCTGTGTTTTCTG
ENST00000647103|1|+|28993467|28993512|1|(ABE;-;@16;NG;ATG:ACG;M:T;)	ENST00000647103	1	T	GTGCATGTTCCTGTGTTTTCTG
ENST00000373467|1|+|32893826|32893871|190|(Target-AID;-;@17;NG;GCC:ACC;A:T;)	ENST00000373467	190	T	AGGCGCTGCTGGGGTCGCACTG
ENST00000339480|1|+|34761641|34761686|137|(Target-AID;+;@18;NG;TTC:TTT;F:F;)	ENST00000339480	137	F	TTCAAGGCCGCCGTGGATGCTG
ENST00000339480|1|+|34761641|34761686|137|(Target-AID;+;@19;NG;TTC:TTT;F:F;)	ENST00000339480	137	F	TCAAGGCCGCCGTGGATGCTGG
ENST00000339480|1|+|34761641|34761686|137|(Target-AID;+;@18;NGG;TTC:TTT;F:F;)	ENST00000339480	137	F	TTCAAGGCCGCCGTGGATGCTGG
ENST00000373362|1|+|34784996|34785041|86|(ABE;-;@17;NG;TGC:CGC;C:R;)	ENST00000373362	86	R	GGCATGTGACGAAGATGAGCTG
ENST00000373362|1|+|34784996|34785041|86|(ABE;-;@14;NG;TGC:CGC;C:R;)	ENST00000373362	86	R	AGGGGCATGTGACGAAGATGAG
ENST00000373366|1|+|34784996|34785041|86|(ABE;-;@17;NG;TGC:CGC;C:R;)	ENST00000373366	86	R	GGCATGTGACGAAGATGAGCTG
ENST00000373366|1|+|34784996|34785041|86|(ABE;-;@14;NG;TGC:CGC;C:R;)	ENST00000373366	86	R	AGGGGCATGTGACGAAGATGAG
ENST00000373362|1|+|34785287|34785332|183|(Target-AID;-;@18;NG;GAG:AAG;E:K;)	ENST00000373362	183	K	CTCGGTAGGTCGGGCAATGTAG
ENST00000373366|1|+|34785287|34785332|183|(Target-AID;-;@18;NG;GAG:AAG;E:K;)	ENST00000373366	183	K	CTCGGTAGGTCGGGCAATGTAG
ENST00000373362|1|+|34785320|34785365|194|(Target-AID;-;@18;NG;GCC:ACC;A:T;)	ENST00000373362	194	T	GGCGCCCACCATGAAGTAGGTG
ENST00000373366|1|+|34785320|34785365|194|(Target-AID;-;@18;NG;GCC:ACC;A:T;)	ENST00000373366	194	T	GGCGCCCACCATGAAGTAGGTG
ENST00000372759|1|+|40258370|40258415|41|(Target-AID;+;@17;NG;CAG:TAG;Q:*;)	ENST00000372759	41	*	CGGCAGGTGAGCCTAGACAGGG
ENST00000372759|1|+|40271986|40272031|248|(Target-AID;+;@19;NG;CCT:CTT;P:L;)	ENST00000372759	248	L	CCTTTGACGAAGGTGTATGTTG
ENST00000372759|1|+|40285966|40286011|340|(ABE;-;@14;NGG;TGG:CGG;W:R;)	ENST00000372759	340	R	ACTTCCAGTGCCCCAGTTCATGG
ENST00000372759|1|+|40285966|40286011|340|(ABE;-;@15;NG;TGG:CGG;W:R;)	ENST00000372759	340	R	CTTCCAGTGCCCCAGTTCATGG
ENST00000372759|1|+|40285966|40286011|340|(ABE;-;@14;NG;TGG:CGG;W:R;)	ENST00000372759	340	R	ACTTCCAGTGCCCCAGTTCATG
ENST00000347132|1|+|40819394|40819439|260|(Target-AID;-;@18;NGG;GAG:AAG;E:K;)	ENST00000347132	260	K	CTCAGCCAGGTAGACCAGGAAGG
ENST00000347132|1|+|40819394|40819439|260|(Target-AID;-;@19;NG;GAG:AAG;E:K;)	ENST00000347132	260	K	TCAGCCAGGTAGACCAGGAAGG
ENST00000347132|1|+|40819394|40819439|260|(Target-AID;-;@18;NG;GAG:AAG;E:K;)	ENST00000347132	260	K	CTCAGCCAGGTAGACCAGGAAG
ENST00000509682|1|+|40819394|40819439|260|(Target-AID;-;@18;NGG;GAG:AAG;E:K;)	ENST00000509682	260	K	CTCAGCCAGGTAGACCAGGAAGG
ENST00000509682|1|+|40819394|40819439|260|(Target-AID;-;@19;NG;GAG:AAG;E:K;)	ENST00000509682	260	K	TCAGCCAGGTAGACCAGGAAGG
ENST00000509682|1|+|40819394|40819439|260|(Target-AID;-;@18;NG;GAG:AAG;E:K;)	ENST00000509682	260	K	CTCAGCCAGGTAGACCAGGAAG
ENST00000642618|1|+|40819394|40819439|260|(Target-AID;-;@18;NGG;GAG:AAG;E:K;)	ENST00000642618	260	K	CTCAGCCAGGTAGACCAGGAAGG
ENST00000642618|1|+|40819394|40819439|260|(Target-AID;-;@19;NG;GAG:AAG;E:K;)	ENST00000642618	260	K	TCAGCCAGGTAGACCAGGAAGG
ENST00000642618|1|+|40819394|40819439|260|(Target-AID;-;@18;NG;GAG:AAG;E:K;)	ENST00000642618	260	K	CTCAGCCAGGTAGACCAGGAAG
ENST00000347132|1|+|40819424|40819469|270|(ABE;-;@15;NG;TAC:CAC;Y:H;)	ENST00000347132	270	H	GGCGTAGGAGGAGAAGTCGGAG
ENST00000347132|1|+|40819424|40819469|270|(ABE;-;@13;NG;TAC:CAC;Y:H;)	ENST00000347132	270	H	TCGGCGTAGGAGGAGAAGTCGG
ENST00000509682|1|+|40819424|40819469|270|(ABE;-;@15;NG;TAC:CAC;Y:H;)	ENST00000509682	270	H	GGCGTAGGAGGAGAAGTCGGAG
ENST00000509682|1|+|40819424|40819469|270|(ABE;-;@13;NG;TAC:CAC;Y:H;)	ENST00000509682	270	H	TCGGCGTAGGAGGAGAAGTCGG
ENST00000642618|1|+|40819424|40819469|270|(ABE;-;@15;NG;TAC:CAC;Y:H;)	ENST00000642618	270	H	GGCGTAGGAGGAGAAGTCGGAG
ENST00000642618|1|+|40819424|40819469|270|(ABE;-;@13;NG;TAC:CAC;Y:H;)	ENST00000642618	270	H	TCGGCGTAGGAGGAGAAGTCGG
ENST00000372470|1|+|43349243|43349288|491|(Target-AID;-;@19;NG;TGG:TAG;W:*;)	ENST00000372470	491	*	CCAGGCTAGGAGACAAAAAGGG
ENST00000413998|1|+|43349243|43349288|484|(Target-AID;-;@19;NG;TGG:TAG;W:*;)	ENST00000413998	484	*	CCAGGCTAGGAGACAAAAAGGG
ENST00000372470|1|+|43349285|43349330|505|(Target-AID;-;@18;NG;AGC:AAC;S:N;)	ENST00000372470	505	N	CGCTGAGGCCCAGCACTAGATG
ENST00000413998|1|+|43349285|43349330|498|(Target-AID;-;@18;NG;AGC:AAC;S:N;)	ENST00000413998	498	N	CGCTGAGGCCCAGCACTAGATG
ENST00000372450|1|+|43403200|43403245|25|(Target-AID;+;@18;NG;CGA:TGA;R:*;)	ENST00000372450	25	*	ATCGAATCTCCCGAAATGTTCG
ENST00000562955|1|+|43403200|43403245|25|(Target-AID;+;@18;NG;CGA:TGA;R:*;)	ENST00000562955	25	*	ATCGAATCTCCCGAAATGTTCG
ENST00000634258|1|+|43403200|43403245|25|(Target-AID;+;@18;NG;CGA:TGA;R:*;)	ENST00000634258	25	*	ATCGAATCTCCCGAAATGTTCG
ENST00000562955|1|+|43438709|43438754|2124|(ABE;+;@15;NG;CTA:CTG;L:L;)	ENST00000562955	2124	L	GTTCTATGTCGGCGCCTGGATG
ENST00000562955|1|+|43438709|43438754|2124|(Target-AID;+;@17;NG;CTA:TTA;L:L;)	ENST00000562955	2124	L	GTTCTATGTCGGCGCCTGGATG
ENST00000562955|1|+|43438709|43438754|2124|(ABE;+;@17;NG;CTA:CTG;L:L;)	ENST00000562955	2124	L	TCTATGTCGGCGCCTGGATGAG
ENST00000562955|1|+|43438709|43438754|2124|(Target-AID;+;@19;NG;CTA:TTA;L:L;)	ENST00000562955	2124	L	TCTATGTCGGCGCCTGGATGAG
ENST00000562955|1|+|43438709|43438754|2124|(ABE;+;@17;NGG;CTA:CTG;L:L;)	ENST00000562955	2124	L	TCTATGTCGGCGCCTGGATGAGG
ENST00000562955|1|+|43438709|43438754|2124|(Target-AID;+;@19;NGG;CTA:TTA;L:L;)	ENST00000562955	2124	L	TCTATGTCGGCGCCTGGATGAGG
ENST00000634258|1|+|43438709|43438754|2181|(ABE;+;@15;NG;CTA:CTG;L:L;)	ENST00000634258	2181	L	GTTCTATGTCGGCGCCTGGATG
ENST00000634258|1|+|43438709|43438754|2181|(Target-AID;+;@17;NG;CTA:TTA;L:L;)	ENST00000634258	2181	L	GTTCTATGTCGGCGCCTGGATG
ENST00000634258|1|+|43438709|43438754|2181|(ABE;+;@17;NG;CTA:CTG;L:L;)	ENST00000634258	2181	L	TCTATGTCGGCGCCTGGATGAG
ENST00000634258|1|+|43438709|43438754|2181|(Target-AID;+;@19;NG;CTA:TTA;L:L;)	ENST00000634258	2181	L	TCTATGTCGGCGCCTGGATGAG
ENST00000634258|1|+|43438709|43438754|2181|(ABE;+;@17;NGG;CTA:CTG;L:L;)	ENST00000634258	2181	L	TCTATGTCGGCGCCTGGATGAGG
[truncated: 31,329 more rows]

## Sheet: amino acid mutations; remove
guide: id	transcript: id	aminoacid: position	amino acid mutation	guide+PAM sequence
ENST00000003084|7|+|117480073|117480118|1|(Target-AID;-;@17;NGG;GTG:ATG;V:M;)	ENST00000003084	1	M	GCATGGTCTCTCGGGCGCTGGGG
ENST00000003084|7|+|117480073|117480118|1|(Target-AID;-;@17;NG;GTG:ATG;V:M;)	ENST00000003084	1	M	GCATGGTCTCTCGGGCGCTGGG
ENST00000003084|7|+|117480076|117480121|2|(ABE;-;@15;NG;TAG:CAG;*:Q;)	ENST00000003084	2	Q	CCTCTGCATGGTCTCTCGGGCG
ENST00000003084|7|+|117504232|117504277|19|(ABE;+;@15;NG;TAG:TGG;*:W;)	ENST00000003084	19	W	TAGCTGGACCAGACCAATTTTG
ENST00000003084|7|+|117504232|117504277|19|(ABE;+;@17;NG;TAG:TGG;*:W;)	ENST00000003084	19	W	GCTGGACCAGACCAATTTTGAG
ENST00000003084|7|+|117504232|117504277|19|(ABE;+;@17;NGG;TAG:TGG;*:W;)	ENST00000003084	19	W	GCTGGACCAGACCAATTTTGAGG
ENST00000003084|7|+|117504232|117504277|19|(ABE;+;@14;NG;TGA:TGG;*:W;)	ENST00000003084	19	W	TAGCTGGACCAGACCAATTTTG
ENST00000003084|7|+|117504232|117504277|19|(ABE;+;@16;NG;TGA:TGG;*:W;)	ENST00000003084	19	W	GCTGGACCAGACCAATTTTGAG
ENST00000003084|7|+|117504232|117504277|19|(ABE;+;@16;NGG;TGA:TGG;*:W;)	ENST00000003084	19	W	GCTGGACCAGACCAATTTTGAGG
ENST00000003084|7|+|117504313|117504358|46|(ABE;-;@14;NGG;GTT:GCT;V:A;)	ENST00000003084	46	A	TTGTCAGCAGAATCAACAGAAGG
ENST00000003084|7|+|117504313|117504358|46|(ABE;-;@14;NG;GTT:GCT;V:A;)	ENST00000003084	46	A	TTGTCAGCAGAATCAACAGAAG
ENST00000003084|7|+|117509046|117509091|67|(ABE;-;@14;NG;CTT:CCT;L:P;)	ENST00000003084	67	P	AGTTTAGGATTTTTCTTTGAAG
ENST00000003084|7|+|117509067|117509112|74|(ABE;-;@14;NG;TGG:CGG;W:R;)	ENST00000003084	74	R	ATCGCCGAAGGGCATTAATGAG
ENST00000003084|7|+|117509070|117509115|75|(ABE;-;@17;NG;TGA:CGA;*:R;)	ENST00000003084	75	R	ATCGCCGAAGGGCATTAATGAG
ENST00000003084|7|+|117509070|117509115|75|(ABE;+;@14;NG;CAA:CGA;Q:R;)	ENST00000003084	75	R	TTCGGCGATGTTTTTTCTGGAG
ENST00000003084|7|+|117535238|117535283|198|(ABE;+;@13;NG;ACA:GCA;T:A;)	ENST00000003084	198	A	TGCATTGGCACATTTCGTGTGG
ENST00000003084|7|+|117535259|117535304|205|(ABE;-;@17;NG;TCT:CCT;S:P;)	ENST00000003084	205	P	AAGGAGCGATCCACACGAAATG
ENST00000003084|7|+|117535292|117535337|216|(ABE;+;@13;NG;TAG:TGG;*:W;)	ENST00000003084	216	W	CTAATCTGGGAGTTGTTACAGG
ENST00000003084|7|+|117540097|117540142|297|(ABE;+;@13;NG;CAG:CGG;Q:R;)	ENST00000003084	297	R	CTGACTCGGAAGGCAGCCTATG
ENST00000003084|7|+|117540097|117540142|297|(ABE;+;@15;NG;CAG:CGG;Q:R;)	ENST00000003084	297	R	GACTCGGAAGGCAGCCTATGTG
ENST00000003084|7|+|117540139|117540184|311|(Target-AID;+;@17;NG;CTC:TTC;L:F;)	ENST00000003084	311	F	TTCTTCTTCTCAGGGTTCTTTG
ENST00000003084|7|+|117540139|117540184|311|(Target-AID;+;@19;NG;CTC:TTC;L:F;)	ENST00000003084	311	F	CTTCTTCTCAGGGTTCTTTGTG
ENST00000003084|7|+|117540139|117540184|311|(Target-AID;+;@19;NGG;CTC:TTC;L:F;)	ENST00000003084	311	F	CTTCTTCTCAGGGTTCTTTGTGG
ENST00000003084|7|+|117540205|117540250|333|(ABE;-;@17;NG;TTC:CTC;F:L;)	ENST00000003084	333	L	GGAGGATGATTCCTTTGATTAG
ENST00000003084|7|+|117540208|117540253|334|(ABE;-;@15;NG;TGG:CGG;W:R;)	ENST00000003084	334	R	TTTCCGGAGGATGATTCCTTTG
ENST00000003084|7|+|117540220|117540265|338|(ABE;-;@16;NG;ATC:ACC;I:T;)	ENST00000003084	338	T	GGTGGTGAATATTTTCCGGAGG
ENST00000003084|7|+|117540247|117540292|347|(ABE;+;@15;NG;CAC:CGC;H:R;)	ENST00000003084	347	R	TCTGCGCATGGCGGTCACTCGG
ENST00000003084|7|+|117540253|117540298|349|(ABE;-;@16;NG;GTG:GCG;V:A;)	ENST00000003084	349	A	GACCGCCATGCGCAGAACAATG
ENST00000003084|7|+|117540262|117540307|352|(ABE;-;@17;NG;TGG:CGG;W:R;)	ENST00000003084	352	R	GCCGAGTGACCGCCATGCGCAG
ENST00000003084|7|+|117540262|117540307|352|(ABE;-;@14;NG;TGG:CGG;W:R;)	ENST00000003084	352	R	ATTGCCGAGTGACCGCCATGCG
ENST00000003084|7|+|117540262|117540307|352|(ABE;+;@13;NG;CAG:CGG;Q:R;)	ENST00000003084	352	R	GTCACTCGGCAATTTCCCTGGG
ENST00000003084|7|+|117540262|117540307|352|(ABE;+;@16;NG;CAG:CGG;Q:R;)	ENST00000003084	352	R	ACTCGGCAATTTCCCTGGGCTG
ENST00000003084|7|+|117541994|117542039|373|(ABE;+;@17;NG;AAT:GAT;N:D;)	ENST00000003084	373	D	TAGGATTTCTTACAAAAGCAAG
ENST00000003084|7|+|117559448|117559493|467|(Target-AID;+;@17;NG;CCT:CTT;P:L;)	ENST00000003084	467	L	CACTTCTAATGGTGATTATGGG
ENST00000003084|7|+|117559448|117559493|467|(Target-AID;+;@19;NG;CCT:CTT;P:L;)	ENST00000003084	467	L	CTTCTAATGGTGATTATGGGAG
ENST00000003084|7|+|117559457|117559502|470|(ABE;+;@16;NG;ATG:GTG;M:V;)	ENST00000003084	470	V	AATGGTGATTATGGGAGAACTG
ENST00000003084|7|+|117559457|117559502|470|(ABE;+;@17;NG;ATG:GTG;M:V;)	ENST00000003084	470	V	ATGGTGATTATGGGAGAACTGG
ENST00000003084|7|+|117559457|117559502|470|(ABE;+;@16;NGG;ATG:GTG;M:V;)	ENST00000003084	470	V	AATGGTGATTATGGGAGAACTGG
ENST00000003084|7|+|117559487|117559532|480|(ABE;+;@15;NG;AGT:GGT;S:G;)	ENST00000003084	480	G	CAGAGGGTAAAATTAAGCACAG
ENST00000003084|7|+|117559628|117559673|527|(Target-AID;-;@17;NG;GAG:GAA;E:E;)	ENST00000003084	527	E	CTCTTCTAGTTGGCATGCTTTG
ENST00000003084|7|+|117587777|117587822|549|(ABE;+;@13;NG;AAT:AGT;N:S;)	ENST00000003084	549	S	ACACTGAGTGGAGGTCAACGAG
ENST00000003084|7|+|117587777|117587822|549|(ABE;+;@17;NG;AAT:AGT;N:S;)	ENST00000003084	549	S	TGAGTGGAGGTCAACGAGCAAG
ENST00000003084|7|+|117587780|117587825|550|(ABE;+;@15;NG;AGA:GGA;R:G;)	ENST00000003084	550	G	TGAGTGGAGGTCAACGAGCAAG
ENST00000003084|7|+|117587786|117587831|552|(ABE;-;@15;NG;TAA:CAA;*:Q;)	ENST00000003084	552	Q	TCGTTGACCTCCACTCAGTGTG
ENST00000003084|7|+|117587789|117587834|553|(ABE;+;@16;NG;CAA:CGA;Q:R;)	ENST00000003084	553	R	CAACGAGCAAGAATTTCTTTAG
ENST00000003084|7|+|117590335|117590380|562|(ABE;+;@14;NG;ATA:GTA;I:V;)	ENST00000003084	562	V	AGAGCAGTATACAAAGATGCTG
ENST00000003084|7|+|117592009|117592054|622|(ABE;+;@16;NG;GAT:GGT;D:G;)	ENST00000003084	622	G	GAAGGTAGCAGCTATTTTTATG
ENST00000003084|7|+|117592009|117592054|622|(ABE;+;@17;NG;GAT:GGT;D:G;)	ENST00000003084	622	G	AAGGTAGCAGCTATTTTTATGG
ENST00000003084|7|+|117592009|117592054|622|(ABE;+;@16;NGG;GAT:GGT;D:G;)	ENST00000003084	622	G	GAAGGTAGCAGCTATTTTTATGG
ENST00000003084|7|+|117592009|117592054|622|(ABE;+;@17;NGG;GAT:GGT;D:G;)	ENST00000003084	622	G	AAGGTAGCAGCTATTTTTATGGG
ENST00000003084|7|+|117592198|117592243|685|(ABE;-;@13;NG;TAA:CAA;*:Q;)	ENST00000003084	685	Q	AAAGATTGTTTTTTTGTTTCTG
ENST00000003084|7|+|117592498|117592543|785|(ABE;-;@17;NGG;TGA:CGA;*:R;)	ENST00000003084	785	R	TTCGGTGAATGTTCTGACCTTGG
ENST00000003084|7|+|117592498|117592543|785|(ABE;-;@17;NG;TGA:CGA;*:R;)	ENST00000003084	785	R	TTCGGTGAATGTTCTGACCTTG
ENST00000003084|7|+|117594953|117594998|846|(ABE;+;@14;NG;TAG:TGG;*:W;)	ENST00000003084	846	W	CTACATGGAACACATACCTTCG
ENST00000003084|7|+|117594953|117594998|846|(ABE;+;@13;NG;TGA:TGG;*:W;)	ENST00000003084	846	W	CTACATGGAACACATACCTTCG
ENST00000003084|7|+|117603631|117603676|927|(Target-AID;+;@17;NG;CCT:CTT;P:L;)	ENST00000003084	927	L	TGCTTGCTATGGGATTCTTCAG
ENST00000003084|7|+|117603685|117603730|945|(ABE;-;@14;NG;TTG:TCG;L:S;)	ENST00000003084	945	S	ATTTTCGACACTGTGATTAGAG
ENST00000003084|7|+|117606729|117606774|996|(ABE;+;@14;NG;CAA:CAG;Q:Q;)	ENST00000003084	996	Q	CATCCAGGTATGTAAAAATAAG
ENST00000003084|7|+|117610545|117610590|1013|(ABE;-;@13;NG;CTC:CCC;L:P;)	ENST00000003084	1013	P	GATGTAGGGTTGTAAAACTGCG
ENST00000003084|7|+|117610632|117610677|1042|(ABE;-;@13;NG;TAA:CAA;*:Q;)	ENST00000003084	1042	Q	TCCAGTTGTTTGAGTTGCTGTG
ENST00000003084|7|+|117611600|117611645|1061|(ABE;+;@17;NG;AGA:GGA;R:G;)	ENST00000003084	1061	G	AAAGGACTATGGACACTTCGTG
ENST00000003084|7|+|117611612|117611657|1065|(Target-AID;+;@18;NG;CCT:CTT;P:L;)	ENST00000003084	1065	L	ACTTCGTGCCTTCGGACGGCAG
ENST00000003084|7|+|117611624|117611669|1069|(ABE;+;@17;NG;AGA:GGA;R:G;)	ENST00000003084	1069	G	TTCGGACGGCAGCCTTACTTTG
ENST00000003084|7|+|117611627|117611672|1070|(ABE;+;@13;NG;CAG:CGG;Q:R;)	ENST00000003084	1070	R	TTCGGACGGCAGCCTTACTTTG
ENST00000003084|7|+|117614656|117614701|1145|(ABE;+;@14;NG;TAG:TGG;*:W;)	ENST00000003084	1145	W	TGCAGTGGGCTGTAAACTCCAG
ENST00000003084|7|+|117614656|117614701|1145|(ABE;+;@13;NG;TGA:TGG;*:W;)	ENST00000003084	1145	W	TGCAGTGGGCTGTAAACTCCAG
ENST00000003084|7|+|117642428|117642473|1244|(ABE;+;@14;NG;GAA:GGA;E:G;)	ENST00000003084	1244	G	TCTTGGGAAGAACTGGATCAGG
ENST00000003084|7|+|117642428|117642473|1244|(ABE;+;@14;NGG;GAA:GGA;E:G;)	ENST00000003084	1244	G	TCTTGGGAAGAACTGGATCAGGG
ENST00000003084|7|+|117642461|117642506|1255|(Target-AID;+;@19;NG;CCA:TCA;P:S;)	ENST00000003084	1255	S	ATCAGCTTTTTTGAGACTACTG
ENST00000003084|7|+|117642506|117642551|1270|(ABE;+;@13;NG;AAT:GAT;N:D;)	ENST00000003084	1270	D	CCAGATCGATGGTGTGTCTTGG
ENST00000003084|7|+|117642506|117642551|1270|(ABE;+;@13;NGG;AAT:GAT;N:D;)	ENST00000003084	1270	D	CCAGATCGATGGTGTGTCTTGGG
ENST00000003084|7|+|117642542|117642587|1282|(ABE;+;@13;NG;TAG:TGG;*:W;)	ENST00000003084	1282	W	CAACAGTGGAGGAAAGCCTTTG
ENST00000003084|7|+|117642542|117642587|1282|(ABE;+;@14;NG;TAG:TGG;*:W;)	ENST00000003084	1282	W	AACAGTGGAGGAAAGCCTTTGG
ENST00000003084|7|+|117642542|117642587|1282|(ABE;+;@16;NG;TAG:TGG;*:W;)	ENST00000003084	1282	W	CAGTGGAGGAAAGCCTTTGGAG
ENST00000003084|7|+|117642542|117642587|1282|(ABE;+;@13;NGG;TAG:TGG;*:W;)	ENST00000003084	1282	W	CAACAGTGGAGGAAAGCCTTTGG
ENST00000003084|7|+|117642542|117642587|1282|(ABE;+;@13;NG;TGA:TGG;*:W;)	ENST00000003084	1282	W	AACAGTGGAGGAAAGCCTTTGG
ENST00000003084|7|+|117642542|117642587|1282|(ABE;+;@15;NG;TGA:TGG;*:W;)	ENST00000003084	1282	W	CAGTGGAGGAAAGCCTTTGGAG
ENST00000003084|7|+|117642545|117642590|1283|(ABE;+;@13;NG;AAG:AGG;K:R;)	ENST00000003084	1283	R	CAGTGGAGGAAAGCCTTTGGAG
ENST00000003084|7|+|117652874|117652919|1310|(ABE;+;@17;NG;TAG:TGG;*:W;)	ENST00000003084	1310	W	AGTGGAGTGATCAAGAAATATG
ENST00000003084|7|+|117652874|117652919|1310|(ABE;+;@17;NGG;TAG:TGG;*:W;)	ENST00000003084	1310	W	AGTGGAGTGATCAAGAAATATGG
ENST00000003084|7|+|117652874|117652919|1310|(ABE;+;@16;NG;TGA:TGG;*:W;)	ENST00000003084	1310	W	AGTGGAGTGATCAAGAAATATG
ENST00000003084|7|+|117652874|117652919|1310|(ABE;+;@17;NG;TGA:TGG;*:W;)	ENST00000003084	1310	W	GTGGAGTGATCAAGAAATATGG
ENST00000003084|7|+|117652874|117652919|1310|(ABE;+;@16;NGG;TGA:TGG;*:W;)	ENST00000003084	1310	W	AGTGGAGTGATCAAGAAATATGG
ENST00000003084|7|+|117664747|117664792|1349|(ABE;+;@17;NG;GAC:GGC;D:G;)	ENST00000003084	1349	G	ATGGCCACAAGCAGTTGATGTG
ENST00000003084|7|+|117666913|117666958|1424|(ABE;-;@14;NG;TAT:TAC;Y:Y;)	ENST00000003084	1424	Y	GGAATCGTACTGCCGCACTTTG
ENST00000003084|7|+|117666922|117666967|1427|(Target-AID;+;@18;NG;ACC:ATC;T:I;)	ENST00000003084	1427	I	CATCCAGAAACTGCTGAACGAG
ENST00000003084|7|+|117667030|117667075|1463|(ABE;+;@17;NG;CAA:CAG;Q:Q;)	ENST00000003084	1463	Q	CCAGATTGCTGCTCTGAAAGAG
ENST00000003084|7|+|117667030|117667075|1463|(ABE;+;@17;NGG;CAA:CAG;Q:Q;)	ENST00000003084	1463	Q	CCAGATTGCTGCTCTGAAAGAGG
ENST00000007722|17|+|50077001|50077046|658|(ABE;-;@16;NG;ATG:ACG;M:T;)	ENST00000007722	658	T	GTTCGTCACGTTGATGCTCAGG
ENST00000023897|5|+|161882586|161882631|204|(ABE;-;@14;NGG;CGT:CGC;R:R;)	ENST00000023897	204	R	CACTGAGCGTGCTGGCTCTCTGG
ENST00000023897|5|+|161882586|161882631|204|(ABE;-;@15;NG;CGT:CGC;R:R;)	ENST00000023897	204	R	ACTGAGCGTGCTGGCTCTCTGG
ENST00000023897|5|+|161882586|161882631|204|(ABE;-;@14;NG;CGT:CGC;R:R;)	ENST00000023897	204	R	CACTGAGCGTGCTGGCTCTCTG
ENST00000023897|5|+|161882616|161882661|214|(ABE;+;@13;NG;CAT:CGT;H:R;)	ENST00000023897	214	R	GGATCACGTCTAAACCAGTATG
ENST00000023897|5|+|161895667|161895712|294|(ABE;-;@17;NG;ATA:ACA;I:T;)	ENST00000023897	294	T	GTTGTCATGGTGAGCACAGTTG
ENST00000023897|5|+|161897350|161897395|441|(ABE;+;@14;NG;ACA:ACG;T:T;)	ENST00000023897	441	T	GGCTACGTATTTAAACAGAGAG
ENST00000029410|5|+|177600225|177600270|13|(ABE;+;@16;NG;TAG:TGG;*:W;)	ENST00000029410	13	W	CCCTGGGAGGACGGCAGGTGAG
ENST00000029410|5|+|177600225|177600270|13|(ABE;+;@15;NG;TGA:TGG;*:W;)	ENST00000029410	13	W	CCCTGGGAGGACGGCAGGTGAG
ENST00000029410|5|+|177600225|177600270|13|(ABE;+;@17;NG;TGA:TGG;*:W;)	ENST00000029410	13	W	CTGGGAGGACGGCAGGTGAGCG
ENST00000029410|5|+|177600225|177600270|13|(ABE;+;@17;NGG;TGA:TGG;*:W;)	ENST00000029410	13	W	CTGGGAGGACGGCAGGTGAGCGG
ENST00000029410|5|+|177607482|177607527|206|(Target-AID;+;@17;NG;CCC:CTC;P:L;)	ENST00000029410	206	L	TGCTCTCCAAGCAGCACTACCG
ENST00000029410|5|+|177607482|177607527|206|(Target-AID;+;@17;NGG;CCC:CTC;P:L;)	ENST00000029410	206	L	TGCTCTCCAAGCAGCACTACCGG
ENST00000039007|X|+|38352675|38352720|1|(Target-AID;-;@19;NGG;GTG:ATG;V:M;)	ENST00000039007	1	M	ATCTTCTTTTAATTGTGTAAAGG
ENST00000039007|X|+|38352675|38352720|1|(Target-AID;-;@19;NG;GTG:ATG;V:M;)	ENST00000039007	1	M	ATCTTCTTTTAATTGTGTAAAG
ENST00000039007|X|+|38352675|38352720|1|(ABE;+;@14;NG;ATA:ATG;I:M;)	ENST00000039007	1	M	GAAGATGCTGTTTAATCTGAGG
ENST00000039007|X|+|38352741|38352786|23|(ABE;-;@14;NG;TGA:CGA;*:R;)	ENST00000039007	23	R	AATTTCGAACCATGAAGTTGTG
ENST00000039007|X|+|38367297|38367342|36|(ABE;-;@16;NGG;TAG:CAG;*:Q;)	ENST00000039007	36	Q	AGCTGCACTTTATTTTGTAGTGG
ENST00000039007|X|+|38367297|38367342|36|(ABE;-;@17;NG;TAG:CAG;*:Q;)	ENST00000039007	36	Q	GCTGCACTTTATTTTGTAGTGG
ENST00000039007|X|+|38367297|38367342|36|(ABE;-;@16;NG;TAG:CAG;*:Q;)	ENST00000039007	36	Q	AGCTGCACTTTATTTTGTAGTG
ENST00000039007|X|+|38367363|38367408|58|(ABE;+;@15;NG;TAG:TGG;*:W;)	ENST00000039007	58	W	GCTATGGCTATCAGCAGATCTG
ENST00000039007|X|+|38367363|38367408|58|(ABE;+;@14;NG;TGA:TGG;*:W;)	ENST00000039007	58	W	GCTATGGCTATCAGCAGATCTG
ENST00000039007|X|+|38367378|38367423|63|(Target-AID;+;@18;NG;CCG:CTG;P:L;)	ENST00000039007	63	L	TCTGAAATTTAGGATAAAACAG
ENST00000039007|X|+|38369804|38369849|83|(ABE;+;@17;NG;GAC:GGC;D:G;)	ENST00000039007	83	G	TAGGCATGATTTTTGAGAAAAG
ENST00000039007|X|+|38369816|38369861|87|(ABE;+;@15;NG;AAG:GAG;K:E;)	ENST00000039007	87	E	TTTTTGAGAAAAGAAGTACTCG
ENST00000039007|X|+|38369825|38369870|90|(Target-AID;-;@18;NG;GGT:AGT;G:S;)	ENST00000039007	90	S	ACTTCTTTTCTCAAAAATCATG
ENST00000039007|X|+|38401260|38401305|132|(ABE;-;@13;NG;TTT:TCT;F:S;)	ENST00000039007	132	S	CATGCTAGACAATACACTGTGG
ENST00000039007|X|+|38401275|38401320|137|(ABE;+;@14;NG;ACA:GCA;T:A;)	ENST00000039007	137	A	GCAGATGCAGTATTGGCTCGAG
ENST00000039007|X|+|38401275|38401320|137|(ABE;+;@16;NG;ACA:GCA;T:A;)	ENST00000039007	137	A	AGATGCAGTATTGGCTCGAGTG
ENST00000039007|X|+|38401287|38401332|141|(ABE;-;@16;NG;TGA:CGA;*:R;)	ENST00000039007	141	R	ACTCGAGCCAATACTGCATCTG
ENST00000039007|X|+|38401287|38401332|141|(ABE;+;@16;NG;CAA:CGA;Q:R;)	ENST00000039007	141	R	GCTCGAGTGTATAAACAATCAG
ENST00000039007|X|+|38401320|38401365|152|(ABE;-;@17;NG;GTT:GCT;V:A;)	ENST00000039007	152	A	TTAGCCAGGGTGTCCAAATCTG
ENST00000039007|X|+|38401344|38401389|160|(Target-AID;+;@18;NG;ACC:ATC;T:I;)	ENST00000039007	160	I	TATCAATGGGCTGTCAGATTTG
ENST00000039007|X|+|38401347|38401392|161|(Target-AID;-;@17;NG;AGT:AAT;S:N;)	ENST00000039007	161	N	CCATTGATAATTGGGATGGATG
ENST00000039007|X|+|38401389|38401434|175|(Target-AID;-;@18;NG;GGT:GAT;G:D;)	ENST00000039007	175	D	AATCAGCCAGGATCTGGATAGG
ENST00000039007|X|+|38401398|38401443|178|(ABE;-;@16;NG;ATG:ACG;M:T;)	ENST00000039007	178	T	GAGCGTGAGGTAATCAGCCAGG
ENST00000039007|X|+|38403626|38403671|191|(ABE;-;@16;NG;TTC:CTC;F:L;)	ENST00000039007	191	L	CTGAGGGTAAGACCTTTCAGAG
ENST00000039007|X|+|38403626|38403671|191|(ABE;-;@14;NG;TTC:CTC;F:L;)	ENST00000039007	191	L	AGCTGAGGGTAAGACCTTTCAG
ENST00000039007|X|+|38403641|38403686|196|(ABE;+;@16;NG;AAT:GAT;N:D;)	ENST00000039007	196	D	CGGGGATGGGAACAATATCCTG
ENST00000039007|X|+|38403644|38403689|197|(ABE;+;@13;NG;AGG:GGG;R:G;)	ENST00000039007	197	G	CGGGGATGGGAACAATATCCTG
ENST00000039007|X|+|38403656|38403701|201|(Target-AID;+;@19;NG;CCG:CTG;P:L;)	ENST00000039007	201	L	CTGCACTCCATCATGATGAGCG
ENST00000039007|X|+|38403671|38403716|206|(ABE;+;@16;NG;ATA:ATG;I:M;)	ENST00000039007	206	M	TGATGAGCGCAGCGAAATTCGG
ENST00000039007|X|+|38403674|38403719|207|(ABE;+;@14;NG;AAC:AGC;N:S;)	ENST00000039007	207	S	TGATGAGCGCAGCGAAATTCGG
ENST00000039007|X|+|38403677|38403722|208|(ABE;+;@16;NG;ACA:GCA;T:A;)	ENST00000039007	208	A	GAGCGCAGCGAAATTCGGAATG
ENST00000039007|X|+|38403689|38403734|212|(ABE;+;@13;NG;AGA:GGA;R:G;)	ENST00000039007	212	G	GAAATTCGGAATGCACCTTCAG
ENST00000039007|X|+|38403689|38403734|212|(ABE;+;@13;NGG;AGA:GGA;R:G;)	ENST00000039007	212	G	GAAATTCGGAATGCACCTTCAGG
ENST00000039007|X|+|38403695|38403740|214|(ABE;-;@16;NG;TAC:CAC;Y:H;)	ENST00000039007	214	H	AGGTGCATTCCGAATTTCGCTG
ENST00000039007|X|+|38403695|38403740|214|(ABE;-;@13;NG;TAC:CAC;Y:H;)	ENST00000039007	214	H	TGAAGGTGCATTCCGAATTTCG
ENST00000039007|X|+|38403698|38403743|215|(ABE;-;@16;NG;TTT:CTT;F:L;)	ENST00000039007	215	L	TGAAGGTGCATTCCGAATTTCG
ENST00000039007|X|+|38403713|38403758|220|(ABE;-;@15;NGG;CTA:CCA;L:P;)	ENST00000039007	220	P	CCTTTGGAGTAGCTGCCTGAAGG
ENST00000039007|X|+|38403713|38403758|220|(ABE;-;@16;NG;CTA:CCA;L:P;)	ENST00000039007	220	P	CTTTGGAGTAGCTGCCTGAAGG
ENST00000039007|X|+|38403713|38403758|220|(ABE;-;@15;NG;CTA:CCA;L:P;)	ENST00000039007	220	P	CCTTTGGAGTAGCTGCCTGAAG
ENST00000039007|X|+|38408729|38408774|225|(ABE;-;@17;NGG;TCG:CCG;S:P;)	ENST00000039007	225	P	CCGGCTCATAACCCTAAAGGAGG
ENST00000039007|X|+|38408729|38408774|225|(ABE;-;@17;NG;TCG:CCG;S:P;)	ENST00000039007	225	P	CCGGCTCATAACCCTAAAGGAG
ENST00000039007|X|+|38408771|38408816|239|(ABE;+;@15;NG;GAA:GAG;E:E;)	ENST00000039007	239	E	AAAGAGGTATGCTCTTTACATG
ENST00000039007|X|+|38408887|38408932|251|(ABE;+;@13;NG;TTA:TTG;L:L;)	ENST00000039007	251	L	ATCCATTGGAAGCAGCGCATGG
ENST00000039007|X|+|38408887|38408932|251|(ABE;+;@15;NG;TTA:TTG;L:L;)	ENST00000039007	251	L	CCATTGGAAGCAGCGCATGGAG
ENST00000039007|X|+|38408887|38408932|251|(ABE;+;@15;NGG;TTA:TTG;L:L;)	ENST00000039007	251	L	CCATTGGAAGCAGCGCATGGAGG
ENST00000039007|X|+|38408887|38408932|251|(Target-AID;+;@17;NG;CTG:TTG;L:L;)	ENST00000039007	251	L	CCATTGGAAGCAGCGCATGGAG
ENST00000039007|X|+|38408887|38408932|251|(Target-AID;+;@17;NGG;CTG:TTG;L:L;)	ENST00000039007	251	L	CCATTGGAAGCAGCGCATGGAGG
ENST00000039007|X|+|38408893|38408938|253|(ABE;+;@17;NG;ACA:GCA;T:A;)	ENST00000039007	253	A	GAAGCAGCGCATGGAGGCAATG
ENST00000039007|X|+|38408929|38408974|265|(Target-AID;+;@17;NG;CGG:TGG;R:W;)	ENST00000039007	265	W	ACTTGGATAAGCATGGGACAAG
ENST00000039007|X|+|38408929|38408974|265|(ABE;+;@16;NG;TAG:TGG;*:W;)	ENST00000039007	265	W	ACTTGGATAAGCATGGGACAAG
ENST00000039007|X|+|38408929|38408974|265|(ABE;+;@15;NG;TGA:TGG;*:W;)	ENST00000039007	265	W	ACTTGGATAAGCATGGGACAAG
ENST00000039007|X|+|38408941|38408986|269|(ABE;+;@15;NG;GAA:GGA;E:G;)	ENST00000039007	269	G	CATGGGACAAGAAGAGGAGAAG
ENST00000039007|X|+|38408944|38408989|270|(Target-AID;-;@17;NG;CGA:CAA;R:Q;)	ENST00000039007	270	Q	TCTTGTCCCATGCTTATCCAAG
ENST00000039007|X|+|38411879|38411924|303|(Target-AID;+;@17;NG;CGC:TGC;R:C;)	ENST00000039007	303	C	CACTGCTTGCCCAGAAAGCCAG
ENST00000039007|X|+|38411900|38411945|310|(Target-AID;-;@19;NG;GGA:GAA;G:E;)	ENST00000039007	310	E	TTCTTCTGGCTTTCTGGGCAAG
ENST00000039007|X|+|38411966|38412011|332|(ABE;+;@14;NG;TAG:TGG;*:W;)	ENST00000039007	332	W	GAAAGTGGACAATCATGGTAAG
ENST00000039007|X|+|38411966|38412011|332|(ABE;+;@13;NG;TGA:TGG;*:W;)	ENST00000039007	332	W	GAAAGTGGACAATCATGGTAAG
ENST00000039007|X|+|38411975|38412020|335|(ABE;+;@15;NG;ATA:ATG;I:M;)	ENST00000039007	335	M	ATCATGGTAAGCAAGAAACAAG
ENST00000039007|X|+|38411975|38412020|335|(ABE;+;@16;NG;ATA:ATG;I:M;)	ENST00000039007	335	M	TCATGGTAAGCAAGAAACAAGG
ENST00000039007|X|+|38411975|38412020|335|(ABE;+;@15;NGG;ATA:ATG;I:M;)	ENST00000039007	335	M	ATCATGGTAAGCAAGAAACAAGG
ENST00000039007|X|+|38421028|38421073|345|(Target-AID;+;@19;NG;CAC:TAC;H:Y;)	ENST00000039007	345	Y	TTACTCACCTCAGCTCCAGAAG
ENST00000039007|X|+|38421037|38421082|348|(ABE;-;@17;NG;TAG:CAG;*:Q;)	ENST00000039007	348	Q	GCTGAGGTGAGTAATCTGTCAG
ENST00000039007|X|+|38421037|38421082|348|(ABE;-;@13;NG;TAG:CAG;*:Q;)	ENST00000039007	348	Q	TGGAGCTGAGGTGAGTAATCTG
ENST00000046640|17|+|3647484|3647529|42|(ABE;+;@15;NG;ATC:GTC;I:V;)	ENST00000046640	42	V	CCAACGTCAGCCTCACCCTGCG
ENST00000046640|17|+|3647484|3647529|42|(ABE;+;@16;NG;ATC:GTC;I:V;)	ENST00000046640	42	V	CAACGTCAGCCTCACCCTGCGG
ENST00000046640|17|+|3647484|3647529|42|(ABE;+;@15;NGG;ATC:GTC;I:V;)	ENST00000046640	42	V	CCAACGTCAGCCTCACCCTGCGG
ENST00000046640|17|+|3655284|3655329|139|(ABE;-;@16;NG;TTC:TCC;F:S;)	ENST00000046640	139	S	GATGGACCAGGCCACAAAGTAG
ENST00000046640|17|+|3655284|3655329|139|(ABE;-;@13;NG;TTC:TCC;F:S;)	ENST00000046640	139	S	GGAGATGGACCAGGCCACAAAG
ENST00000046640|17|+|3656547|3656592|182|(Target-AID;+;@17;NG;CGG:TGG;R:W;)	ENST00000046640	182	W	CTCTGGGTGCCCTACATCAAGG
ENST00000046640|17|+|3656705|3656750|205|(ABE;+;@16;NG;AAC:GAC;N:D;)	ENST00000046640	205	D	CAACGACGTCTTCTTCAGCCTG
ENST00000046640|17|+|3659950|3659995|323|(ABE;-;@13;NGG;AAT:AAC;N:N;)	ENST00000046640	323	N	ACTCACCGTTGTTGTAGGACTGG
ENST00000046640|17|+|3659950|3659995|323|(ABE;-;@14;NG;AAT:AAC;N:N;)	ENST00000046640	323	N	CTCACCGTTGTTGTAGGACTGG
ENST00000046640|17|+|3659950|3659995|323|(ABE;-;@13;NG;AAT:AAC;N:N;)	ENST00000046640	323	N	ACTCACCGTTGTTGTAGGACTG
ENST00000046640|17|+|3660345|3660390|368|(Target-AID;+;@18;NG;CAG:TAG;Q:*;)	ENST00000046640	368	*	ACTAGCACCCAGGGACCCAGTG
ENST00000053469|6|+|42173739|42173784|50|(ABE;-;@15;NGG;CTG:CCG;L:P;)	ENST00000053469	50	P	CCGACGGGCTCAGGTTCTTGAGG
ENST00000053469|6|+|42173739|42173784|50|(ABE;-;@15;NG;CTG:CCG;L:P;)	ENST00000053469	50	P	CCGACGGGCTCAGGTTCTTGAG
ENST00000053469|6|+|42173739|42173784|50|(ABE;-;@13;NG;CTG:CCG;L:P;)	ENST00000053469	50	P	GGCCGACGGGCTCAGGTTCTTG
ENST00000053469|6|+|42178306|42178351|84|(ABE;-;@13;NG;TTC:CTC;F:L;)	ENST00000053469	84	L	CCCTTGAGGACCAAGCTGAGCG
ENST00000053469|6|+|42179226|42179271|151|(ABE;-;@15;NG;TTC:CTC;F:L;)	ENST00000053469	151	L	GGAGAGTTCCCCTGGGGTAGAG
ENST00000053867|17|+|44349143|44349188|1|(Target-AID;+;@17;NG;ACG:ATG;T:M;)	ENST00000053867	1	M	CCATGTGGACCCTGGTGAGCTG
ENST00000053867|17|+|44349143|44349188|1|(Target-AID;+;@17;NGG;ACG:ATG;T:M;)	ENST00000053867	1	M	CCATGTGGACCCTGGTGAGCTGG
ENST00000053867|17|+|44349143|44349188|1|(ABE;+;@13;NG;ATA:ATG;I:M;)	ENST00000053867	1	M	AGACCATGTGGACCCTGGTGAG
ENST00000053867|17|+|44349143|44349188|1|(ABE;+;@17;NG;ATA:ATG;I:M;)	ENST00000053867	1	M	CATGTGGACCCTGGTGAGCTGG
ENST00000053867|17|+|44349143|44349188|1|(ABE;+;@17;NGG;ATA:ATG;I:M;)	ENST00000053867	1	M	CATGTGGACCCTGGTGAGCTGGG
ENST00000053867|17|+|44349167|44349212|9|(ABE;-;@16;NGG;GTC:GCC;V:A;)	ENST00000053867	9	A	TAAGGCCACCCAGCTCACCAGGG
ENST00000053867|17|+|44349167|44349212|9|(ABE;-;@15;NGG;GTC:GCC;V:A;)	ENST00000053867	9	A	TTAAGGCCACCCAGCTCACCAGG
ENST00000053867|17|+|44349167|44349212|9|(ABE;-;@17;NG;GTC:GCC;V:A;)	ENST00000053867	9	A	AAGGCCACCCAGCTCACCAGGG
ENST00000053867|17|+|44349167|44349212|9|(ABE;-;@16;NG;GTC:GCC;V:A;)	ENST00000053867	9	A	TAAGGCCACCCAGCTCACCAGG
ENST00000053867|17|+|44349167|44349212|9|(ABE;-;@15;NG;GTC:GCC;V:A;)	ENST00000053867	9	A	TTAAGGCCACCCAGCTCACCAG
ENST00000053867|17|+|44350229|44350274|125|(ABE;-;@15;NG;TAG:CAG;*:Q;)	ENST00000053867	125	Q	GCACTGGATGGCACCCACGGAG
ENST00000053867|17|+|44350229|44350274|125|(ABE;-;@13;NG;TAG:CAG;*:Q;)	ENST00000053867	125	Q	GGGCACTGGATGGCACCCACGG
ENST00000053867|17|+|44352382|44352427|493|(ABE;-;@15;NGG;TGA:CGA;*:R;)	ENST00000053867	493	R	GGATCGAGCCTTCACGTTGCAGG
ENST00000053867|17|+|44352382|44352427|493|(ABE;-;@16;NG;TGA:CGA;*:R;)	ENST00000053867	493	R	GATCGAGCCTTCACGTTGCAGG
ENST00000053867|17|+|44352382|44352427|493|(ABE;-;@15;NG;TGA:CGA;*:R;)	ENST00000053867	493	R	GGATCGAGCCTTCACGTTGCAG
ENST00000078429|19|+|3110168|3110213|60|(ABE;-;@16;NG;TGC:CGC;C:R;)	ENST00000078429	60	R	ATGCGCATCTGCTTGATGAACG
ENST00000078429|19|+|3121098|3121143|341|(ABE;-;@14;NG;TTT:TTC;F:F;)	ENST00000078429	341	F	GGCCGCGAACACGAAGCGGATG
ENST00000078527|1|+|26794625|26794670|205|(Target-AID;-;@17;NG;AGC:AAC;S:N;)	ENST00000078527	205	N	CCGTTGGAGCGTACCCCAGTGG
ENST00000078527|1|+|26795033|26795078|341|(ABE;-;@17;NG;GTA:GCA;V:A;)	ENST00000078527	341	A	GTTGCCCAGGCAACCAGTATAG
ENST00000155840|11|+|2445077|2445122|1|(Target-AID;-;@17;NGG;GTG:ATG;V:M;)	ENST00000155840	1	M	CCATAACGAGGAGGGCCTGCCGG
ENST00000155840|11|+|2445077|2445122|1|(Target-AID;-;@17;NG;GTG:ATG;V:M;)	ENST00000155840	1	M	CCATAACGAGGAGGGCCTGCCG
ENST00000155840|11|+|2445107|2445152|11|(ABE;+;@14;NG;AAG:GAG;K:E;)	ENST00000155840	11	E	AGGGCCGAGAGGAAGCGCTGGG
ENST00000155840|11|+|2445107|2445152|11|(ABE;+;@15;NG;AAG:GAG;K:E;)	ENST00000155840	11	E	GGGCCGAGAGGAAGCGCTGGGG
ENST00000155840|11|+|2445107|2445152|11|(ABE;+;@14;NGG;AAG:GAG;K:E;)	ENST00000155840	11	E	AGGGCCGAGAGGAAGCGCTGGGG
ENST00000155840|11|+|2445299|2445344|75|(Target-AID;+;@19;NG;GTC:GTT;V:V;)	ENST00000155840	75	V	TTGCCTCCGACCTTGGCCCGCG
ENST00000155840|11|+|2445299|2445344|75|(Target-AID;+;@19;NGG;GTC:GTT;V:V;)	ENST00000155840	75	V	TTGCCTCCGACCTTGGCCCGCGG
ENST00000155840|11|+|2445419|2445464|115|(ABE;+;@15;NG;AAG:GAG;K:E;)	ENST00000155840	115	E	TCCTCGAGCGTCCCACCGGCTG
ENST00000155840|11|+|2445419|2445464|115|(ABE;+;@16;NG;AAG:GAG;K:E;)	ENST00000155840	115	E	CCTCGAGCGTCCCACCGGCTGG
ENST00000155840|11|+|2445419|2445464|115|(ABE;+;@15;NGG;AAG:GAG;K:E;)	ENST00000155840	115	E	TCCTCGAGCGTCCCACCGGCTGG
ENST00000155840|11|+|2445425|2445470|117|(ABE;-;@15;NG;TCC:CCC;S:P;)	ENST00000155840	117	P	GGTGGGACGCTCGAGGAAGTTG
ENST00000155840|11|+|2445425|2445470|117|(ABE;-;@16;NG;CTC:CCC;L:P;)	ENST00000155840	117	P	GGTGGGACGCTCGAGGAAGTTG
ENST00000155840|11|+|2527928|2527973|137|(ABE;-;@17;NGG;TTC:CTC;F:L;)	ENST00000155840	137	L	TGAGGCAGACCAGGACGATGAGG
ENST00000155840|11|+|2527928|2527973|137|(ABE;-;@17;NG;TTC:CTC;F:L;)	ENST00000155840	137	L	TGAGGCAGACCAGGACGATGAG
ENST00000155840|11|+|2527928|2527973|137|(ABE;-;@15;NG;TTC:CTC;F:L;)	ENST00000155840	137	L	GATGAGGCAGACCAGGACGATG
ENST00000155840|11|+|2527937|2527982|140|(Target-AID;-;@17;NGG;GGC:AGC;G:S;)	ENST00000155840	140	S	CGCTGAAGATGAGGCAGACCAGG
ENST00000155840|11|+|2527937|2527982|140|(Target-AID;-;@18;NG;GGC:AGC;G:S;)	ENST00000155840	140	S	GCTGAAGATGAGGCAGACCAGG
ENST00000155840|11|+|2527937|2527982|140|(Target-AID;-;@17;NG;GGC:AGC;G:S;)	ENST00000155840	140	S	CGCTGAAGATGAGGCAGACCAG
ENST00000155840|11|+|2527940|2527985|141|(ABE;+;@14;NG;ATG:GTG;M:V;)	ENST00000155840	141	V	TTCAGCGTGCTGTCCACCATCG
ENST00000155840|11|+|2527952|2527997|145|(ABE;-;@17;NG;ATT:ATC;I:I;)	ENST00000155840	145	I	CTCGATGGTGGACAGCACGCTG
ENST00000155840|11|+|2527952|2527997|145|(ABE;-;@14;NG;ATT:ATC;I:I;)	ENST00000155840	145	I	CTGCTCGATGGTGGACAGCACG
ENST00000155840|11|+|2527955|2528000|146|(Target-AID;-;@19;NG;GGG:GAG;G:E;)	ENST00000155840	146	E	CTCGATGGTGGACAGCACGCTG
ENST00000155840|11|+|2527964|2528009|149|(ABE;-;@17;NGG;GCT:GCC;A:A;)	ENST00000155840	149	A	GGCGGCATACTGCTCGATGGTGG
ENST00000155840|11|+|2527964|2528009|149|(ABE;-;@17;NG;GCT:GCC;A:A;)	ENST00000155840	149	A	GGCGGCATACTGCTCGATGGTG
ENST00000155840|11|+|2527976|2528021|153|(ABE;+;@13;NG;ACA:ACG;T:T;)	ENST00000155840	153	T	TGGCCACGGGGACTCTCTTCTG
ENST00000155840|11|+|2527976|2528021|153|(ABE;+;@14;NG;ACA:ACG;T:T;)	ENST00000155840	153	T	GGCCACGGGGACTCTCTTCTGG
ENST00000155840|11|+|2527976|2528021|153|(ABE;+;@17;NG;ACA:ACG;T:T;)	ENST00000155840	153	T	CACGGGGACTCTCTTCTGGATG
ENST00000155840|11|+|2527976|2528021|153|(ABE;+;@13;NGG;ACA:ACG;T:T;)	ENST00000155840	153	T	TGGCCACGGGGACTCTCTTCTGG
ENST00000155840|11|+|2527976|2528021|153|(ABE;+;@17;NGG;ACA:ACG;T:T;)	ENST00000155840	153	T	CACGGGGACTCTCTTCTGGATGG
ENST00000155840|11|+|2570639|2570684|171|(ABE;-;@14;NG;TAT:TAC;Y:Y;)	ENST00000155840	171	Y	GACCACGTACTCCGTCCCGAAG
ENST00000155840|11|+|2570648|2570693|174|(ABE;-;@13;NG;TGC:CGC;C:R;)	ENST00000155840	174	R	CAGAGGCGGACCACGTACTCCG
ENST00000155840|11|+|2570678|2570723|184|(Target-AID;+;@19;NG;CAC:TAC;H:Y;)	ENST00000155840	184	Y	GTACGTGGGCCTCTGGGGGCGG
ENST00000155840|11|+|2570687|2570732|187|(Target-AID;+;@19;NG;CCC:CTC;P:L;)	ENST00000155840	187	L	CTCTGGGGGCGGCTGCGCTTTG
ENST00000155840|11|+|2571308|2571353|204|(ABE;-;@16;NG;ATT:ATC;I:I;)	ENST00000155840	204	I	CCACGATGAGGTCTGTGGAGTG
ENST00000155840|11|+|2571338|2571383|214|(ABE;-;@14;NGG;TGT:TGC;C:C;)	ENST00000155840	214	C	GCCCACGCAGAGGACCACCATGG
ENST00000155840|11|+|2571338|2571383|214|(ABE;-;@14;NG;TGT:TGC;C:C;)	ENST00000155840	214	C	GCCCACGCAGAGGACCACCATG
ENST00000155840|11|+|2571371|2571416|225|(ABE;-;@15;NG;TTG:TCG;L:S;)	ENST00000155840	225	S	TGGCCGACGTGGCAAACACCTG
ENST00000155840|11|+|2571992|2572037|229|(ABE;+;@15;NG;GAC:GGC;D:G;)	ENST00000155840	229	G	CAGGGGCATCCGCTTCCTGCAG
ENST00000155840|11|+|2571998|2572043|231|(ABE;-;@14;NGG;TGC:CGC;C:R;)	ENST00000155840	231	R	GGAAGCGGATGCCCCTGCGAAGG
ENST00000155840|11|+|2571998|2572043|231|(ABE;-;@17;NG;TGC:CGC;C:R;)	ENST00000155840	231	R	AGCGGATGCCCCTGCGAAGGAG
ENST00000155840|11|+|2571998|2572043|231|(ABE;-;@15;NG;TGC:CGC;C:R;)	ENST00000155840	231	R	GAAGCGGATGCCCCTGCGAAGG
ENST00000155840|11|+|2571998|2572043|231|(ABE;-;@14;NG;TGC:CGC;C:R;)	ENST00000155840	231	R	GGAAGCGGATGCCCCTGCGAAG
ENST00000155840|11|+|2572025|2572070|240|(ABE;-;@13;NGG;CAT:CAC;H:H;)	ENST00000155840	240	H	GGTCGACGTGTAGCATCCTCAGG
ENST00000155840|11|+|2572025|2572070|240|(ABE;-;@14;NG;CAT:CAC;H:H;)	ENST00000155840	240	H	GTCGACGTGTAGCATCCTCAGG
ENST00000155840|11|+|2572025|2572070|240|(ABE;-;@13;NG;CAT:CAC;H:H;)	ENST00000155840	240	H	GGTCGACGTGTAGCATCCTCAG
ENST00000155840|11|+|2572034|2572079|243|(ABE;+;@14;NG;CAC:CGC;H:R;)	ENST00000155840	243	R	TCGACCGCCAGGGAGGCACCTG
ENST00000155840|11|+|2572034|2572079|243|(ABE;+;@17;NG;CAC:CGC;H:R;)	ENST00000155840	243	R	ACCGCCAGGGAGGCACCTGGAG
ENST00000155840|11|+|2572034|2572079|243|(ABE;+;@14;NGG;CAC:CGC;H:R;)	ENST00000155840	243	R	TCGACCGCCAGGGAGGCACCTGG
ENST00000155840|11|+|2572034|2572079|243|(ABE;+;@17;NGG;CAC:CGC;H:R;)	ENST00000155840	243	R	ACCGCCAGGGAGGCACCTGGAGG
ENST00000155840|11|+|2572064|2572109|253|(ABE;-;@16;NGG;TTC:TCC;F:S;)	ENST00000155840	253	S	CACGGAGCCCAGGAGCCTCCAGG
ENST00000155840|11|+|2572064|2572109|253|(ABE;-;@17;NG;TTC:TCC;F:S;)	ENST00000155840	253	S	ACGGAGCCCAGGAGCCTCCAGG
ENST00000155840|11|+|2572064|2572109|253|(ABE;-;@16;NG;TTC:TCC;F:S;)	ENST00000155840	253	S	CACGGAGCCCAGGAGCCTCCAG
ENST00000155840|11|+|2572082|2572127|259|(ABE;+;@16;NG;CAC:CGC;H:R;)	ENST00000155840	259	R	CACCGCCAGGTGGGTGGCCCGG
ENST00000155840|11|+|2572082|2572127|259|(ABE;+;@17;NG;CAC:CGC;H:R;)	ENST00000155840	259	R	ACCGCCAGGTGGGTGGCCCGGG
ENST00000155840|11|+|2572082|2572127|259|(ABE;+;@16;NGG;CAC:CGC;H:R;)	ENST00000155840	259	R	CACCGCCAGGTGGGTGGCCCGGG
ENST00000155840|11|+|2572824|2572869|261|(ABE;+;@16;NG;AAG:GAG;K:E;)	ENST00000155840	261	E	CTAGGAGCTGATAACCACCCTG
ENST00000155840|11|+|2572854|2572899|271|(Target-AID;+;@19;NG;CTA:TTA;L:L;)	ENST00000155840	271	L	CCTGGGCCTCATCTTCTCCTCG
ENST00000155840|11|+|2572854|2572899|271|(ABE;-;@14;NGG;TTG:CTG;L:L;)	ENST00000155840	271	L	GGCCCAGGAAGCCGATGTACAGG
ENST00000155840|11|+|2572854|2572899|271|(ABE;-;@14;NG;TTG:CTG;L:L;)	ENST00000155840	271	L	GGCCCAGGAAGCCGATGTACAG
ENST00000155840|11|+|2572860|2572905|273|(ABE;-;@15;NG;TTC:CTC;F:L;)	ENST00000155840	273	L	GATGAGGCCCAGGAAGCCGATG
ENST00000155840|11|+|2572872|2572917|277|(ABE;-;@13;NG;TTG:TCG;L:S;)	ENST00000155840	277	S	AAAGTACGAGGAGAAGATGAGG
ENST00000155840|11|+|2572941|2572986|300|(ABE;+;@13;NG;ACA:GCA;T:A;)	ENST00000155840	300	A	CAGCTACGCAGATGCGCTGTGG
ENST00000155840|11|+|2572941|2572986|300|(ABE;+;@16;NG;ACA:GCA;T:A;)	ENST00000155840	300	A	CTACGCAGATGCGCTGTGGTGG
ENST00000155840|11|+|2572941|2572986|300|(ABE;+;@16;NGG;ACA:GCA;T:A;)	ENST00000155840	300	A	CTACGCAGATGCGCTGTGGTGGG
ENST00000155840|11|+|2572947|2572992|302|(ABE;-;@16;NG;GTG:GCG;V:A;)	ENST00000155840	302	A	CAGCGCATCTGCGTAGCTGCCG
ENST00000155840|11|+|2572947|2572992|302|(ABE;-;@13;NG;GTG:GCG;V:A;)	ENST00000155840	302	A	CCACAGCGCATCTGCGTAGCTG
ENST00000155840|11|+|2583419|2583464|310|(ABE;+;@17;NG;ATC:GTC;I:V;)	ENST00000155840	310	V	ACAGTCACCACCATCGGCTATG
ENST00000155840|11|+|2583419|2583464|310|(ABE;+;@17;NGG;ATC:GTC;I:V;)	ENST00000155840	310	V	ACAGTCACCACCATCGGCTATGG
ENST00000155840|11|+|2583431|2583476|314|(ABE;+;@13;NG;AGC:GGC;S:G;)	ENST00000155840	314	G	CACCATCGGCTATGGGGACAAG
ENST00000155840|11|+|2583431|2583476|314|(ABE;+;@14;NG;AGC:GGC;S:G;)	ENST00000155840	314	G	ACCATCGGCTATGGGGACAAGG
ENST00000155840|11|+|2583431|2583476|314|(ABE;+;@13;NGG;AGC:GGC;S:G;)	ENST00000155840	314	G	CACCATCGGCTATGGGGACAAGG
ENST00000155840|11|+|2583434|2583479|315|(Target-AID;-;@17;NG;TGT:TAT;C:Y;)	ENST00000155840	315	Y	CCATAGCCGATGGTGGTGACTG
ENST00000155840|11|+|2583449|2583494|320|(ABE;-;@15;NG;TCC:CCC;S:P;)	ENST00000155840	320	P	CTGGGGCACCTTGTCCCCATAG
ENST00000155840|11|+|2583455|2583500|322|(ABE;-;@13;NG;ATG:ACG;M:T;)	ENST00000155840	322	T	GACCCACGTCTGGGGCACCTTG
ENST00000155840|11|+|2583506|2583551|339|(Target-AID;+;@19;NG;TCC:TTC;S:F;)	ENST00000155840	339	F	TTCTTTGCGCTCCCAGCGGTAG
ENST00000155840|11|+|2583506|2583551|339|(Target-AID;+;@19;NGG;TCC:TTC;S:F;)	ENST00000155840	339	F	TTCTTTGCGCTCCCAGCGGTAGG
ENST00000155840|11|+|2583512|2583557|341|(ABE;-;@13;NGG;GTG:GCG;V:A;)	ENST00000155840	341	A	TGGGAGCGCAAAGAAGGAGATGG
ENST00000155840|11|+|2583512|2583557|341|(ABE;-;@14;NG;GTG:GCG;V:A;)	ENST00000155840	341	A	GGGAGCGCAAAGAAGGAGATGG
ENST00000155840|11|+|2583512|2583557|341|(ABE;-;@13;NG;GTG:GCG;V:A;)	ENST00000155840	341	A	TGGGAGCGCAAAGAAGGAGATG
ENST00000155840|11|+|2583515|2583560|342|(ABE;-;@15;NGG;TTC:CTC;F:L;)	ENST00000155840	342	L	TGGGAGCGCAAAGAAGGAGATGG
ENST00000155840|11|+|2583515|2583560|342|(ABE;-;@16;NG;TTC:CTC;F:L;)	ENST00000155840	342	L	GGGAGCGCAAAGAAGGAGATGG
ENST00000155840|11|+|2583515|2583560|342|(ABE;-;@15;NG;TTC:CTC;F:L;)	ENST00000155840	342	L	TGGGAGCGCAAAGAAGGAGATG
ENST00000155840|11|+|2583521|2583566|344|(ABE;-;@13;NG;GTG:GCG;V:A;)	ENST00000155840	344	A	ACCTACCGCTGGGAGCGCAAAG
ENST00000155840|11|+|2583521|2583566|344|(ABE;+;@13;NG;GCA:GCG;A:A;)	ENST00000155840	344	A	TCCCAGCGGTAGGTGCCCCGTG
ENST00000155840|11|+|2583521|2583566|344|(ABE;+;@14;NG;GCA:GCG;A:A;)	ENST00000155840	344	A	CCCAGCGGTAGGTGCCCCGTGG
ENST00000155840|11|+|2583521|2583566|344|(ABE;+;@17;NG;GCA:GCG;A:A;)	ENST00000155840	344	A	AGCGGTAGGTGCCCCGTGGGTG
ENST00000155840|11|+|2583521|2583566|344|(ABE;+;@13;NGG;GCA:GCG;A:A;)	ENST00000155840	344	A	TCCCAGCGGTAGGTGCCCCGTGG
ENST00000155840|11|+|2583521|2583566|344|(ABE;+;@14;NGG;GCA:GCG;A:A;)	ENST00000155840	344	A	CCCAGCGGTAGGTGCCCCGTGGG
ENST00000155840|11|+|2585190|2585235|345|(ABE;+;@13;NG;AGG:GGG;R:G;)	ENST00000155840	345	G	TTCCCAGGGGATTCTTGGCTCG
ENST00000155840|11|+|2585190|2585235|345|(ABE;+;@14;NG;AGG:GGG;R:G;)	ENST00000155840	345	G	TCCCAGGGGATTCTTGGCTCGG
ENST00000155840|11|+|2585190|2585235|345|(ABE;+;@15;NG;AGG:GGG;R:G;)	ENST00000155840	345	G	CCCAGGGGATTCTTGGCTCGGG
ENST00000155840|11|+|2585190|2585235|345|(ABE;+;@16;NG;AGG:GGG;R:G;)	ENST00000155840	345	G	CCAGGGGATTCTTGGCTCGGGG
ENST00000155840|11|+|2585190|2585235|345|(ABE;+;@13;NGG;AGG:GGG;R:G;)	ENST00000155840	345	G	TTCCCAGGGGATTCTTGGCTCGG
ENST00000155840|11|+|2585190|2585235|345|(ABE;+;@14;NGG;AGG:GGG;R:G;)	ENST00000155840	345	G	TCCCAGGGGATTCTTGGCTCGGG
ENST00000155840|11|+|2585190|2585235|345|(ABE;+;@15;NGG;AGG:GGG;R:G;)	ENST00000155840	345	G	CCCAGGGGATTCTTGGCTCGGGG
ENST00000155840|11|+|2585190|2585235|345|(ABE;+;@13;NG;GAG:GGG;E:G;)	ENST00000155840	345	G	TCCCAGGGGATTCTTGGCTCGG
ENST00000155840|11|+|2585190|2585235|345|(ABE;+;@14;NG;GAG:GGG;E:G;)	ENST00000155840	345	G	CCCAGGGGATTCTTGGCTCGGG
ENST00000155840|11|+|2585190|2585235|345|(ABE;+;@15;NG;GAG:GGG;E:G;)	ENST00000155840	345	G	CCAGGGGATTCTTGGCTCGGGG
ENST00000155840|11|+|2585190|2585235|345|(ABE;+;@13;NGG;GAG:GGG;E:G;)	ENST00000155840	345	G	TCCCAGGGGATTCTTGGCTCGGG
ENST00000155840|11|+|2585190|2585235|345|(ABE;+;@14;NGG;GAG:GGG;E:G;)	ENST00000155840	345	G	CCCAGGGGATTCTTGGCTCGGGG
ENST00000155840|11|+|2585214|2585259|353|(Target-AID;+;@18;NG;CCG:CTG;P:L;)	ENST00000155840	353	L	CCTGAAGGTGCAGCAGAAGCAG
ENST00000155840|11|+|2585241|2585286|362|(Target-AID;-;@18;NG;AGG:AAG;R:K;)	ENST00000155840	362	K	GCTTCTGCCTCTGCTTCTGCTG
ENST00000155840|11|+|2585265|2585310|370|(ABE;+;@17;NG;GCA:GCG;A:A;)	ENST00000155840	370	A	GGCGGCAGCCTCACTCATTCAG
ENST00000155840|11|+|2585265|2585310|370|(ABE;+;@17;NGG;GCA:GCG;A:A;)	ENST00000155840	370	A	GGCGGCAGCCTCACTCATTCAGG
ENST00000155840|11|+|2587554|2587599|379|(Target-AID;+;@17;NG;CGG:TGG;R:W;)	ENST00000155840	379	W	GCATGGAGGTGCTATGCTGCCG
ENST00000155840|11|+|2587557|2587602|380|(ABE;+;@14;NG;AGA:AGG;R:R;)	ENST00000155840	380	R	ATGGAGGTGCTATGCTGCCGAG
ENST00000155840|11|+|2587593|2587638|392|(ABE;+;@15;NG;TAG:TGG;*:W;)	ENST00000155840	392	W	CACCTGGAAGATCTACATCCGG
ENST00000155840|11|+|2587593|2587638|392|(ABE;+;@14;NG;TGA:TGG;*:W;)	ENST00000155840	392	W	CACCTGGAAGATCTACATCCGG
ENST00000155840|11|+|2587608|2587653|397|(ABE;-;@15;NGG;TGG:CGG;W:R;)	ENST00000155840	397	R	CTTCCGGATGTAGATCTTCCAGG
ENST00000155840|11|+|2587608|2587653|397|(ABE;-;@16;NG;TGG:CGG;W:R;)	ENST00000155840	397	R	TTCCGGATGTAGATCTTCCAGG
ENST00000155840|11|+|2587608|2587653|397|(ABE;-;@15;NG;TGG:CGG;W:R;)	ENST00000155840	397	R	CTTCCGGATGTAGATCTTCCAG
ENST00000155840|11|+|2588775|2588820|446|(ABE;+;@15;NG;AAC:GAC;N:D;)	ENST00000155840	446	D	CGTGCGACCCCCCAGAAGAGCG
ENST00000155840|11|+|2588775|2588820|446|(ABE;+;@16;NG;AAC:GAC;N:D;)	ENST00000155840	446	D	GTGCGACCCCCCAGAAGAGCGG
ENST00000155840|11|+|2588775|2588820|446|(ABE;+;@15;NGG;AAC:GAC;N:D;)	ENST00000155840	446	D	CGTGCGACCCCCCAGAAGAGCGG
ENST00000155840|11|+|2768859|2768904|518|(ABE;+;@16;NG;CAA:CGA;Q:R;)	ENST00000155840	518	R	ATTCGACGCATGCAGTACTTTG
ENST00000155840|11|+|2768880|2768925|525|(ABE;+;@16;NG;ACC:GCC;T:A;)	ENST00000155840	525	A	TGTGGCCAAGAAGAAATTCCAG
ENST00000155840|11|+|2768880|2768925|525|(ABE;+;@16;NGG;ACC:GCC;T:A;)	ENST00000155840	525	A	TGTGGCCAAGAAGAAATTCCAGG
ENST00000155840|11|+|2768895|2768940|530|(ABE;-;@13;NG;TAG:CAG;*:Q;)	ENST00000155840	530	Q	CTTACCTGGAATTTCTTCTTGG
ENST00000155840|11|+|2775983|2776028|546|(ABE;-;@16;NG;TTG:TCG;L:S;)	ENST00000155840	546	S	CTGCGAGTACTGCTCAATGACG
ENST00000155840|11|+|2776007|2776052|554|(ABE;+;@13;NG;ATG:GTG;M:V;)	ENST00000155840	554	V	CCTCATGGTGCGCATCAAGGAG
ENST00000155840|11|+|2776010|2776055|555|(ABE;-;@17;NGG;TGC:CGC;C:R;)	ENST00000155840	555	R	TGCGCACCATGAGGTTGAGGTGG
ENST00000155840|11|+|2776010|2776055|555|(ABE;-;@17;NG;TGC:CGC;C:R;)	ENST00000155840	555	R	TGCGCACCATGAGGTTGAGGTG
ENST00000155840|11|+|2776010|2776055|555|(ABE;-;@15;NG;TGC:CGC;C:R;)	ENST00000155840	555	R	GATGCGCACCATGAGGTTGAGG
ENST00000155840|11|+|2776010|2776055|555|(ABE;+;@15;NG;CAC:CGC;H:R;)	ENST00000155840	555	R	GGTGCGCATCAAGGAGCTGCAG
ENST00000155840|11|+|2776010|2776055|555|(ABE;+;@17;NG;CAC:CGC;H:R;)	ENST00000155840	555	R	TGCGCATCAAGGAGCTGCAGAG
ENST00000155840|11|+|2776010|2776055|555|(ABE;+;@17;NGG;CAC:CGC;H:R;)	ENST00000155840	555	R	TGCGCATCAAGGAGCTGCAGAGG
ENST00000155840|11|+|2776974|2777019|566|(ABE;-;@16;NG;TTC:TCC;F:S;)	ENST00000155840	566	S	AATGGACTGGTCCAGCCTGGAG
ENST00000155840|11|+|2776980|2777025|568|(ABE;+;@13;NG;AGG:GGG;R:G;)	ENST00000155840	568	G	GTCCATTGGGAAGCCCTCACTG
ENST00000155840|11|+|2777983|2778028|588|(Target-AID;+;@19;NG;ACC:ATC;T:I;)	ENST00000155840	588	I	ATCGGCGCCCGCCTGAACCGAG
ENST00000155840|11|+|2778001|2778046|594|(ABE;+;@16;NG;CAA:CGA;Q:R;)	ENST00000155840	594	R	AACCGAGTAGAAGACAAGGTAG
ENST00000155840|11|+|2778001|2778046|594|(ABE;+;@16;NGG;CAA:CGA;Q:R;)	ENST00000155840	594	R	AACCGAGTAGAAGACAAGGTAGG
ENST00000155840|11|+|2778007|2778052|596|(Target-AID;-;@19;NG;GGA:GAA;G:E;)	ENST00000155840	596	E	TTCTACTCGGTTCAGGCGGGCG
ENST00000155840|11|+|2778007|2778052|596|(Target-AID;-;@17;NG;GGA:GAA;G:E;)	ENST00000155840	596	E	TCTTCTACTCGGTTCAGGCGGG
ENST00000155840|11|+|2847751|2847796|601|(ABE;-;@13;NG;TAG:CAG;*:Q;)	ENST00000155840	601	Q	TCCAGCTGCGTCACCTGCGGGG
ENST00000155840|11|+|2847781|2847826|611|(ABE;+;@13;NG;AAC:GAC;N:D;)	ENST00000155840	611	D	CATCACCGACATGCTTCACCAG
ENST00000155840|11|+|2847808|2847853|620|(ABE;-;@17;NG;CAT:CAC;H:H;)	ENST00000155840	620	H	ACCGTGCAAGGAGAGCAGCTGG
ENST00000155840|11|+|2847808|2847853|620|(ABE;-;@13;NG;CAT:CAC;H:H;)	ENST00000155840	620	H	TGCCACCGTGCAAGGAGAGCAG
ENST00000155840|11|+|2847877|2847922|643|(ABE;+;@17;NG;AGC:GGC;S:G;)	ENST00000155840	643	G	TGCGGCAGTGGCGGCTCCGTCG
ENST00000166345|5|+|914482|914527|354|(Target-AID;-;@19;NGG;CGG:CGA;R:R;)	ENST00000166345	354	R	CTCGGAGGGTCAGCAGCTGCTGG
ENST00000166345|5|+|914482|914527|354|(Target-AID;-;@19;NG;CGG:CGA;R:R;)	ENST00000166345	354	R	CTCGGAGGGTCAGCAGCTGCTG
ENST00000176643|17|+|19656494|19656539|208|(Target-AID;+;@17;NG;CCG:CTG;P:L;)	ENST00000176643	208	L	AACTGGGAGGGAAAAGTCCATG
ENST00000176643|17|+|19656512|19656557|214|(ABE;+;@13;NG;TAT:TGT;Y:C;)	ENST00000176643	214	C	AGTCCATGTTATATTGATAAAG
ENST00000176643|17|+|19656512|19656557|214|(ABE;+;@17;NG;TAT:TGT;Y:C;)	ENST00000176643	214	C	CATGTTATATTGATAAAGATTG
ENST00000176643|17|+|19657775|19657820|245|(ABE;+;@14;NG;AAC:GAC;N:D;)	ENST00000176643	245	D	GCACCCGACTATATTCTCTGTG
ENST00000176643|17|+|19663463|19663508|365|(ABE;-;@14;NG;TTG:TCG;L:S;)	ENST00000176643	365	S	TTATGCGAAAATACATAAAGAG
ENST00000181839|7|+|39999445|39999490|717|(ABE;+;@14;NG;AGA:GGA;R:G;)	ENST00000181839	717	G	ACTTACGGACAAGTTTACAAAG
ENST00000189444|10|+|102402244|102402289|864|(Target-AID;-;@19;NGG;GGC:GAC;G:D;)	ENST00000189444	864	D	GTCTTCCTTCACCTCTGCTGGGG
ENST00000189444|10|+|102402244|102402289|864|(Target-AID;-;@18;NGG;GGC:GAC;G:D;)	ENST00000189444	864	D	TGTCTTCCTTCACCTCTGCTGGG
ENST00000189444|10|+|102402244|102402289|864|(Target-AID;-;@19;NG;GGC:GAC;G:D;)	ENST00000189444	864	D	GTCTTCCTTCACCTCTGCTGGG
ENST00000189444|10|+|102402244|102402289|864|(Target-AID;-;@18;NG;GGC:GAC;G:D;)	ENST00000189444	864	D	TGTCTTCCTTCACCTCTGCTGG
ENST00000189978|9|+|110695395|110695440|125|(ABE;+;@13;NG;CAT:CGT;H:R;)	ENST00000189978	125	R	ATAACTCGTCCTCCCATAAATG
ENST00000189978|9|+|110775770|110775815|319|(Target-AID;+;@19;NG;CAC:TAC;H:Y;)	ENST00000189978	319	Y	GTACTGCTTGGCAGTAAAGGAG
ENST00000189978|9|+|110800721|110800766|703|(ABE;+;@13;NG;AGC:GGC;S:G;)	ENST00000189978	703	G	GGCCTATGGCGTGGTCCTCTGG
ENST00000189978|9|+|110800721|110800766|703|(ABE;+;@14;NG;AGC:GGC;S:G;)	ENST00000189978	703	G	GCCTATGGCGTGGTCCTCTGGG
ENST00000189978|9|+|110800721|110800766|703|(ABE;+;@13;NGG;AGC:GGC;S:G;)	ENST00000189978	703	G	GGCCTATGGCGTGGTCCTCTGGG
ENST00000194900|X|+|70492521|70492566|592|(ABE;+;@15;NG;CAA:CGA;Q:R;)	ENST00000194900	592	R	AGCTCGATTGAAAACTGTGAAG
ENST00000196061|1|+|11949757|11949802|59|(ABE;-;@15;NG;GGT:GGC;G:G;)	ENST00000196061	59	G	CCTAGGCCAAGCGCCTGGAGAG
ENST00000196061|1|+|11949757|11949802|59|(ABE;-;@13;NG;GGT:GGC;G:G;)	ENST00000196061	59	G	CCCCTAGGCCAAGCGCCTGGAG
ENST00000196061|1|+|11952672|11952717|180|(ABE;+;@14;NG;CAA:CAG;Q:Q;)	ENST00000196061	180	Q	CGATCAGCTGTTTTACACCAAG
ENST00000196061|1|+|11957880|11957925|268|(ABE;-;@14;NG;ACT:ACC;T:T;)	ENST00000196061	268	T	ACACACGGTGCAGCCTGTTTCG
ENST00000196061|1|+|11958605|11958650|319|(ABE;-;@13;NGG;TGA:CGA;*:R;)	ENST00000196061	319	R	AAAAGTCGCATGTGTTTCTGGGG
ENST00000196061|1|+|11958605|11958650|319|(ABE;-;@15;NG;TGA:CGA;*:R;)	ENST00000196061	319	R	AAGTCGCATGTGTTTCTGGGGG
ENST00000196061|1|+|11958605|11958650|319|(ABE;-;@13;NG;TGA:CGA;*:R;)	ENST00000196061	319	R	AAAAGTCGCATGTGTTTCTGGG
ENST00000196061|1|+|11963553|11963598|381|(ABE;+;@13;NG;ATG:GTG;M:V;)	ENST00000196061	381	V	CTTCAGCGTGGATGCTGACGTG
ENST00000196061|1|+|11963553|11963598|381|(ABE;+;@14;NG;ATG:GTG;M:V;)	ENST00000196061	381	V	TTCAGCGTGGATGCTGACGTGG
ENST00000196061|1|+|11963553|11963598|381|(ABE;+;@13;NGG;ATG:GTG;M:V;)	ENST00000196061	381	V	CTTCAGCGTGGATGCTGACGTGG
ENST00000196061|1|+|11965521|11965566|512|(ABE;-;@17;NG;TGC:CGC;C:R;)	ENST00000196061	512	R	TGCGGTAGCTGTCTAGGGAGAG
ENST00000196061|1|+|11970708|11970753|606|(ABE;-;@13;NGG;ATT:ATC;I:I;)	ENST00000196061	606	I	CAAAGCCGATCTGGTTCATGTGG
ENST00000196061|1|+|11970708|11970753|606|(ABE;-;@17;NG;ATT:ATC;I:I;)	ENST00000196061	606	I	GCCGATCTGGTTCATGTGGATG
ENST00000196061|1|+|11970708|11970753|606|(ABE;-;@14;NG;ATT:ATC;I:I;)	ENST00000196061	606	I	AAAGCCGATCTGGTTCATGTGG
ENST00000196061|1|+|11970708|11970753|606|(ABE;-;@13;NG;ATT:ATC;I:I;)	ENST00000196061	606	I	CAAAGCCGATCTGGTTCATGTG
ENST00000196061|1|+|11974715|11974760|705|(ABE;-;@13;NG;ATG:ACG;M:T;)	ENST00000196061	705	T	GTAATGCGTGAGTCGTCCAGGG
ENST00000196061|1|+|11974733|11974778|711|(ABE;-;@16;NG;CTT:CTC;L:L;)	ENST00000196061	711	L	TGGGGAGCCCCTCATGGTAATG
ENST00000199280|12|+|49951019|49951064|71|(ABE;+;@16;NG;ATG:GTG;M:V;)	ENST00000199280	71	V	TGCCGTGACTGTGGCCTGCCTG
ENST00000199280|12|+|49951019|49951064|71|(ABE;+;@17;NG;ATG:GTG;M:V;)	ENST00000199280	71	V	GCCGTGACTGTGGCCTGCCTGG
ENST00000199280|12|+|49951019|49951064|71|(ABE;+;@16;NGG;ATG:GTG;M:V;)	ENST00000199280	71	V	TGCCGTGACTGTGGCCTGCCTGG
ENST00000199280|12|+|49954148|49954193|126|(ABE;-;@13;NG;ATG:ACG;M:T;)	ENST00000199280	126	T	GCCAGCCGTCGTGCTGTTGCTG
ENST00000199280|12|+|49954641|49954686|187|(ABE;-;@13;NG;TGC:CGC;C:R;)	ENST00000199280	187	R	AGGGAGCGGGCAGGATTCATAG
ENST00000199280|12|+|49955416|49955461|216|(Target-AID;+;@17;NG;CCC:TCC;P:S;)	ENST00000199280	216	S	GGCTCCCTCCTCTACAACTACG
ENST00000199280|12|+|49955542|49955587|258|(ABE;+;@16;NG;AAG:GAG;K:E;)	ENST00000199280	258	E	GGTGGAGCTGCACTCGCCGCAG
ENST00000199280|12|+|49955554|49955599|262|(ABE;-;@17;NG;CTG:CCG;L:P;)	ENST00000199280	262	P	TGCGGCGAGTGCAGCTCCACCG
ENST00000199447|7|+|37888283|37888328|426|(Target-AID;+;@19;NG;TCG:TTG;S:L;)	ENST00000199447	426	L	TTGCCGGTCAACCAGTTGTATG
ENST00000199447|7|+|37888283|37888328|426|(Target-AID;+;@19;NGG;TCG:TTG;S:L;)	ENST00000199447	426	L	TTGCCGGTCAACCAGTTGTATGG
ENST00000200181|17|+|75727205|75727250|38|(Target-AID;+;@17;NG;CGC:TGC;R:C;)	ENST00000200181	38	C	AGCTGCACGGAGTGTGTCCGTG
ENST00000200181|17|+|75727205|75727250|38|(Target-AID;+;@19;NG;CGC:TGC;R:C;)	ENST00000200181	38	C	CTGCACGGAGTGTGTCCGTGTG
ENST00000200181|17|+|75727205|75727250|38|(Target-AID;+;@19;NGG;CGC:TGC;R:C;)	ENST00000200181	38	C	CTGCACGGAGTGTGTCCGTGTGG
ENST00000200181|17|+|75727400|75727445|61|(ABE;+;@15;NG;TAC:TGC;Y:C;)	ENST00000200181	61	C	GCGCTGCAACACCCAGGCGGAG
ENST00000200181|17|+|75727830|75727875|156|(Target-AID;+;@18;NG;CCG:CTG;P:L;)	ENST00000200181	156	L	CCTGGGTACGGCAGGGCCAGAG
ENST00000200181|17|+|75729274|75729319|200|(ABE;-;@15;NG;CTC:CCC;L:P;)	ENST00000200181	200	P	AGAAGGGGGGGTCACTGTTGGG
ENST00000200181|17|+|75742568|75742613|931|(ABE;+;@15;NG;GAC:GGC;D:G;)	ENST00000200181	931	G	CCGGGGCATGGTGGAGTTCCAG
ENST00000200181|17|+|75742568|75742613|931|(ABE;+;@16;NG;GAC:GGC;D:G;)	ENST00000200181	931	G	CGGGGCATGGTGGAGTTCCAGG
ENST00000200181|17|+|75742568|75742613|931|(ABE;+;@15;NGG;GAC:GGC;D:G;)	ENST00000200181	931	G	CCGGGGCATGGTGGAGTTCCAGG
ENST00000200181|17|+|75752199|75752244|1281|(ABE;+;@14;NG;CGA:CGG;R:R;)	ENST00000200181	1281	R	GAACCGGATGCTGCTTATTGAG
ENST00000200181|17|+|75755762|75755807|1548|(ABE;+;@16;NG;TAG:TGG;*:W;)	ENST00000200181	1548	W	AGCTGGCAGGAGCCGCGGTGCG
ENST00000200181|17|+|75755762|75755807|1548|(ABE;+;@15;NG;TGA:TGG;*:W;)	ENST00000200181	1548	W	AGCTGGCAGGAGCCGCGGTGCG
ENST00000200181|17|+|75755762|75755807|1548|(ABE;+;@17;NG;TGA:TGG;*:W;)	ENST00000200181	1548	W	CTGGCAGGAGCCGCGGTGCGAG
ENST00000200676|16|+|56983357|56983402|459|(Target-AID;-;@19;NG;GGC:GAC;G:D;)	ENST00000200676	459	D	GTCGAAGAGGCTCACGCCTTTG
ENST00000201963|20|+|32798502|32798547|511|(ABE;+;@13;NG;CAA:CAG;Q:Q;)	ENST00000201963	511	Q	AGCTTCAGGAGCCCTGGAGCTG
ENST00000201963|20|+|32800250|32800295|619|(ABE;-;@14;NG;GAT:GAC;D:D;)	ENST00000201963	619	D	CCTCACGTCGTTCACGTATTTG
ENST00000201963|20|+|32807768|32807813|809|(Target-AID;-;@19;NG;GGC:GAC;G:D;)	ENST00000201963	809	D	GTCTGTGTAGTGCACAGGAAAG
ENST00000201963|20|+|32807771|32807816|810|(ABE;+;@15;NG;ATG:GTG;M:V;)	ENST00000201963	810	V	CAGACGTGTCCAACATGGGCCG
ENST00000202028|20|+|36209709|36209754|564|(ABE;-;@16;NG;TGC:CGC;C:R;)	ENST00000202028	564	R	CTGCGGGAGAAGTCTTCGAAGG
ENST00000202625|20|+|2395321|2395366|111|(ABE;-;@17;NG;TGC:CGC;C:R;)	ENST00000202625	111	R	AGCGGCCAATGACAGCACTGGG
ENST00000202625|20|+|2400412|2400457|327|(Target-AID;-;@19;NGG;GGC:GAC;G:D;)	ENST00000202625	327	D	GTCTTCTGTCAGGTCCTCCAGGG
ENST00000202625|20|+|2400412|2400457|327|(Target-AID;-;@18;NGG;GGC:GAC;G:D;)	ENST00000202625	327	D	TGTCTTCTGTCAGGTCCTCCAGG
ENST00000202625|20|+|2400412|2400457|327|(Target-AID;-;@19;NG;GGC:GAC;G:D;)	ENST00000202625	327	D	GTCTTCTGTCAGGTCCTCCAGG
ENST00000202625|20|+|2400412|2400457|327|(Target-AID;-;@18;NG;GGC:GAC;G:D;)	ENST00000202625	327	D	TGTCTTCTGTCAGGTCCTCCAG
ENST00000204679|16|+|1361738|1361783|66|(ABE;-;@13;NGG;TGA:CGA;*:R;)	ENST00000204679	66	R	GAGAGTCGGAAGAGATGCACGGG
ENST00000204679|16|+|1361738|1361783|66|(ABE;-;@13;NG;TGA:CGA;*:R;)	ENST00000204679	66	R	GAGAGTCGGAAGAGATGCACGG
ENST00000204679|16|+|1362020|1362065|108|(ABE;+;@16;NG;TAG:TGG;*:W;)	ENST00000204679	108	W	ATCTGGCACGAGTGGGAGATCG
ENST00000204679|16|+|1362020|1362065|108|(ABE;+;@15;NG;TGA:TGG;*:W;)	ENST00000204679	108	W	ATCTGGCACGAGTGGGAGATCG
ENST00000204961|X|+|68829863|68829908|37|(ABE;+;@17;NG;TGA:TGG;*:W;)	ENST00000204961	37	W	CTGGAGCTCCCTCAACCCCAAG
ENST00000204961|X|+|68838797|68838842|111|(ABE;-;@15;NG;ATC:ACC;I:T;)	ENST00000204961	111	T	TGATGGTAAAGCGTATTTCCTG
ENST00000205143|19|+|39504057|39504102|221|(ABE;-;@16;NG;TGA:CGA;*:R;)	ENST00000205143	221	R	GCTCGGCACACCACTATGGGGG
ENST00000205143|19|+|39504108|39504153|238|(ABE;-;@14;NG;TGA:CGA;*:R;)	ENST00000205143	238	R	GGCATCGGCATTCACCGGGCTG
ENST00000205402|7|+|107893250|107893295|38|(ABE;-;@17;NG;TAG:CAG;*:Q;)	ENST00000205402	38	Q	GCTGATCTGCGTAAGTTCTCAG
ENST00000205402|7|+|107901781|107901826|62|(Target-AID;-;@17;NG;CGG:CAG;R:Q;)	ENST00000205402	62	Q	AACTGGGCAGCTTTAATAGCAG
ENST00000205402|7|+|107917327|107917372|375|(ABE;+;@14;NG;AAA:GAA;K:E;)	ENST00000205402	375	E	TGTGTTGAAGGAATGGCTGGTG
ENST00000205402|7|+|107917327|107917372|375|(ABE;+;@14;NGG;AAA:GAA;K:E;)	ENST00000205402	375	E	TGTGTTGAAGGAATGGCTGGTGG
ENST00000205402|7|+|107919075|107919120|488|(ABE;-;@13;NG;CTG:CCG;L:P;)	ENST00000205402	488	P	AATTACCGGATGTGCATGACAG
ENST00000205890|17|+|18119691|18119736|305|(ABE;-;@13;NG;TAT:TAC;Y:Y;)	ENST00000205890	305	Y	CGTAGCCGTAGGTGTACCCCGG
ENST00000205890|17|+|18120000|18120045|408|(ABE;-;@17;NGG;GTC:GCC;V:A;)	ENST00000205890	408	A	AAGGCCGAAGCCGACTCCTCCGG
ENST00000205890|17|+|18120000|18120045|408|(ABE;-;@17;NG;GTC:GCC;V:A;)	ENST00000205890	408	A	AAGGCCGAAGCCGACTCCTCCG
ENST00000205890|17|+|18120162|18120207|462|(ABE;+;@17;NG;GAC:GGC;D:G;)	ENST00000205890	462	G	AAGGCATGGATAAGCCCGCCAG
ENST00000205890|17|+|18120162|18120207|462|(ABE;+;@17;NGG;GAC:GGC;D:G;)	ENST00000205890	462	G	AAGGCATGGATAAGCCCGCCAGG
ENST00000205890|17|+|18124509|18124554|1220|(ABE;+;@13;NG;AGG:GGG;R:G;)	ENST00000205890	1220	G	GCAGCACGGGGAGGATGGTGTG
ENST00000205890|17|+|18124509|18124554|1220|(ABE;+;@14;NG;AGG:GGG;R:G;)	ENST00000205890	1220	G	CAGCACGGGGAGGATGGTGTGG
ENST00000205890|17|+|18124509|18124554|1220|(ABE;+;@17;NG;AGG:GGG;R:G;)	ENST00000205890	1220	G	CACGGGGAGGATGGTGTGGAGG
ENST00000205890|17|+|18124509|18124554|1220|(ABE;+;@13;NGG;AGG:GGG;R:G;)	ENST00000205890	1220	G	GCAGCACGGGGAGGATGGTGTGG
ENST00000205890|17|+|18126833|18126878|1311|(Target-AID;+;@17;NG;ACA:ATA;T:I;)	ENST00000205890	1311	I	GCATAATCATTAGGTGAGTGGG
ENST00000205890|17|+|18127054|18127099|1315|(ABE;+;@13;NG;GAA:GGA;E:G;)	ENST00000205890	1315	G	GTCAGTGGAGAGAGCGGCTCTG
ENST00000205890|17|+|18127054|18127099|1315|(ABE;+;@14;NG;GAA:GGA;E:G;)	ENST00000205890	1315	G	TCAGTGGAGAGAGCGGCTCTGG
ENST00000205890|17|+|18127054|18127099|1315|(ABE;+;@13;NGG;GAA:GGA;E:G;)	ENST00000205890	1315	G	GTCAGTGGAGAGAGCGGCTCTGG
ENST00000205890|17|+|18132464|18132509|1414|(ABE;+;@13;NG;AAG:GAG;K:E;)	ENST00000205890	1414	E	CTTCTACGAGTTGCTGGCCGGG
ENST00000205890|17|+|18132464|18132509|1414|(ABE;+;@16;NG;AAG:GAG;K:E;)	ENST00000205890	1414	E	CTACGAGTTGCTGGCCGGGTTG
ENST00000205890|17|+|18138105|18138150|1630|(ABE;-;@17;NGG;TGT:CGT;C:R;)	ENST00000205890	1630	R	CACGGATGTACTCCTCCTGCAGG
ENST00000205890|17|+|18138105|18138150|1630|(ABE;-;@17;NG;TGT:CGT;C:R;)	ENST00000205890	1630	R	CACGGATGTACTCCTCCTGCAG
ENST00000205890|17|+|18138105|18138150|1630|(ABE;-;@14;NG;TGT:CGT;C:R;)	ENST00000205890	1630	R	GCTCACGGATGTACTCCTCCTG
ENST00000205890|17|+|18142216|18142261|1937|(ABE;-;@14;NG;TGT:CGT;C:R;)	ENST00000205890	1937	R	AGCCACGGGCCCGGCTTTGCAG
ENST00000205890|17|+|18143556|18143601|1975|(ABE;+;@13;NG;TAG:TGG;*:W;)	ENST00000205890	1975	W	GCAGAGTGGAGGTGCCAGGTGG
ENST00000205890|17|+|18143556|18143601|1975|(ABE;+;@15;NG;TAG:TGG;*:W;)	ENST00000205890	1975	W	AGAGTGGAGGTGCCAGGTGGAG
ENST00000205890|17|+|18143556|18143601|1975|(ABE;+;@16;NG;TAG:TGG;*:W;)	ENST00000205890	1975	W	GAGTGGAGGTGCCAGGTGGAGG
ENST00000205890|17|+|18143556|18143601|1975|(ABE;+;@17;NG;TAG:TGG;*:W;)	ENST00000205890	1975	W	AGTGGAGGTGCCAGGTGGAGGG
ENST00000205890|17|+|18143556|18143601|1975|(ABE;+;@15;NGG;TAG:TGG;*:W;)	ENST00000205890	1975	W	AGAGTGGAGGTGCCAGGTGGAGG
ENST00000205890|17|+|18143556|18143601|1975|(ABE;+;@16;NGG;TAG:TGG;*:W;)	ENST00000205890	1975	W	GAGTGGAGGTGCCAGGTGGAGGG
ENST00000205890|17|+|18143556|18143601|1975|(ABE;+;@17;NGG;TAG:TGG;*:W;)	ENST00000205890	1975	W	AGTGGAGGTGCCAGGTGGAGGGG
ENST00000205890|17|+|18143556|18143601|1975|(ABE;+;@14;NG;TGA:TGG;*:W;)	ENST00000205890	1975	W	AGAGTGGAGGTGCCAGGTGGAG
ENST00000205890|17|+|18143556|18143601|1975|(ABE;+;@15;NG;TGA:TGG;*:W;)	ENST00000205890	1975	W	GAGTGGAGGTGCCAGGTGGAGG
ENST00000205890|17|+|18143556|18143601|1975|(ABE;+;@16;NG;TGA:TGG;*:W;)	ENST00000205890	1975	W	AGTGGAGGTGCCAGGTGGAGGG
ENST00000205890|17|+|18143556|18143601|1975|(ABE;+;@17;NG;TGA:TGG;*:W;)	ENST00000205890	1975	W	GTGGAGGTGCCAGGTGGAGGGG
ENST00000205890|17|+|18143556|18143601|1975|(ABE;+;@14;NGG;TGA:TGG;*:W;)	ENST00000205890	1975	W	AGAGTGGAGGTGCCAGGTGGAGG
ENST00000205890|17|+|18143556|18143601|1975|(ABE;+;@15;NGG;TGA:TGG;*:W;)	ENST00000205890	1975	W	GAGTGGAGGTGCCAGGTGGAGGG
ENST00000205890|17|+|18143556|18143601|1975|(ABE;+;@16;NGG;TGA:TGG;*:W;)	ENST00000205890	1975	W	AGTGGAGGTGCCAGGTGGAGGGG
ENST00000205890|17|+|18143556|18143601|1975|(ABE;+;@17;NGG;TGA:TGG;*:W;)	ENST00000205890	1975	W	GTGGAGGTGCCAGGTGGAGGGGG
ENST00000205890|17|+|18145904|18145949|2110|(ABE;+;@16;NG;AGG:GGG;R:G;)	ENST00000205890	2110	G	CTTCGGGAACTACATCGTGCAG
ENST00000205890|17|+|18145916|18145961|2114|(ABE;+;@13;NG;ATG:GTG;M:V;)	ENST00000205890	2114	V	CTACATCGTGCAGAAGGGGCTG
ENST00000205890|17|+|18145916|18145961|2114|(ABE;+;@14;NG;ATG:GTG;M:V;)	ENST00000205890	2114	V	TACATCGTGCAGAAGGGGCTGG
ENST00000205890|17|+|18145916|18145961|2114|(ABE;+;@17;NG;ATG:GTG;M:V;)	ENST00000205890	2114	V	ATCGTGCAGAAGGGGCTGGCGG
ENST00000205890|17|+|18145916|18145961|2114|(ABE;+;@13;NGG;ATG:GTG;M:V;)	ENST00000205890	2114	V	CTACATCGTGCAGAAGGGGCTGG
ENST00000205890|17|+|18154691|18154736|2728|(ABE;+;@15;NG;CAC:CGC;H:R;)	ENST00000205890	2728	R	CCTTCGCATCTCTGAGGATGAG
ENST00000205890|17|+|18154691|18154736|2728|(ABE;+;@17;NG;CAC:CGC;H:R;)	ENST00000205890	2728	R	TTCGCATCTCTGAGGATGAGAG
ENST00000205890|17|+|18154691|18154736|2728|(ABE;+;@17;NGG;CAC:CGC;H:R;)	ENST00000205890	2728	R	TTCGCATCTCTGAGGATGAGAGG
ENST00000205890|17|+|18156180|18156225|2823|(ABE;+;@13;NG;AAT:GAT;N:D;)	ENST00000205890	2823	D	CTTTGCAGATATCCTGTTTGTG
ENST00000205890|17|+|18159931|18159976|3108|(ABE;+;@15;NG;ATC:GTC;I:V;)	ENST00000205890	3108	V	ATGAGGTCATGCGGGATGAATG
ENST00000205890|17|+|18171668|18171713|3379|(ABE;-;@15;NGG;TTG:TCG;L:S;)	ENST00000205890	3379	S	AGGTCGAGCCTGCCGTTGTACGG
ENST00000205890|17|+|18171668|18171713|3379|(ABE;-;@16;NG;TTG:TCG;L:S;)	ENST00000205890	3379	S	GGTCGAGCCTGCCGTTGTACGG
ENST00000205890|17|+|18171668|18171713|3379|(ABE;-;@15;NG;TTG:TCG;L:S;)	ENST00000205890	3379	S	AGGTCGAGCCTGCCGTTGTACG
ENST00000206249|6|+|151842591|151842636|157|(ABE;-;@14;NG;TGA:CGA;*:R;)	ENST00000206249	157	R	GGCGTCGATTATCTGAATTTGG
ENST00000209728|17|+|40300877|40300922|441|(ABE;+;@16;NG;ATT:GTT;I:V;)	ENST00000209728	441	V	AGAAGTTGATGGTAACAGGATG
ENST00000210444|9|+|98078173|98078218|151|(ABE;+;@17;NG;CAC:CGC;H:R;)	ENST00000210444	151	R	GTCGCCCAATGGTGATCTCCAG
ENST00000210444|9|+|98078284|98078329|188|(Target-AID;+;@17;NG;CAC:TAC;H:Y;)	ENST00000210444	188	Y	GCATACCCGCTCCAGCCTGAGG
ENST00000210444|9|+|98080899|98080944|237|(ABE;-;@13;NG;TGT:CGT;C:R;)	ENST00000210444	237	R	ATGTGACGTTCCAACACCTTGG
ENST00000211998|10|+|74070721|74070766|105|(ABE;-;@16;NGG;TGA:CGA;*:R;)	ENST00000211998	105	R	TCTCGAGCAGGCACTGAGTAAGG
ENST00000211998|10|+|74070721|74070766|105|(ABE;-;@16;NG;TGA:CGA;*:R;)	ENST00000211998	105	R	TCTCGAGCAGGCACTGAGTAAG
ENST00000211998|10|+|74070772|74070817|122|(Target-AID;+;@19;NG;CTA:TTA;L:L;)	ENST00000211998	122	L	CCTGCTCCTTACCTTCGATGAG
ENST00000211998|10|+|74070772|74070817|122|(Target-AID;+;@19;NGG;CTA:TTA;L:L;)	ENST00000211998	122	L	CCTGCTCCTTACCTTCGATGAGG
ENST00000211998|10|+|74070772|74070817|122|(Target-AID;-;@19;NGG;TTG:TTA;L:L;)	ENST00000211998	122	L	GCAGGTCTGATGTTCCAGAGAGG
ENST00000211998|10|+|74070772|74070817|122|(Target-AID;-;@19;NG;TTG:TTA;L:L;)	ENST00000211998	122	L	GCAGGTCTGATGTTCCAGAGAG
ENST00000211998|10|+|74070772|74070817|122|(ABE;-;@15;NG;TTG:CTG;L:L;)	ENST00000211998	122	L	GAGCAGGTCTGATGTTCCAGAG
ENST00000211998|10|+|74070772|74070817|122|(Target-AID;-;@17;NG;TTG:TTA;L:L;)	ENST00000211998	122	L	GAGCAGGTCTGATGTTCCAGAG
ENST00000211998|10|+|74072770|74072815|188|(ABE;-;@13;NG;TGA:CGA;*:R;)	ENST00000211998	188	R	ATCACTCGGTGCTCCTGGTGAG
ENST00000211998|10|+|74090112|74090157|430|(ABE;-;@15;NGG;GAT:GAC;D:D;)	ENST00000211998	430	D	AGAATGTCATCTCTTTCTTTAGG
ENST00000211998|10|+|74090112|74090157|430|(ABE;-;@16;NG;GAT:GAC;D:D;)	ENST00000211998	430	D	GAATGTCATCTCTTTCTTTAGG
ENST00000211998|10|+|74090112|74090157|430|(ABE;-;@15;NG;GAT:GAC;D:D;)	ENST00000211998	430	D	AGAATGTCATCTCTTTCTTTAG
ENST00000211998|10|+|74095729|74095774|547|(ABE;-;@17;NG;TGA:CGA;*:R;)	ENST00000211998	547	R	CTCGGTCACACTTGGCGAGAAG
ENST00000211998|10|+|74095759|74095804|557|(ABE;-;@15;NG;GAT:GAC;D:D;)	ENST00000211998	557	D	GCCAGGTCAGCCAGCTGGGCTG
ENST00000211998|10|+|74103798|74103843|675|(ABE;+;@13;NG;GTA:GTG;V:V;)	ENST00000211998	675	V	GTCAGGTGGTCTCGGCTGCTCG
ENST00000211998|10|+|74111938|74111983|933|(ABE;+;@13;NG;GCA:GCG;A:A;)	ENST00000211998	933	A	CAGATGCGGCCGATGCTGCTGG
ENST00000211998|10|+|74112064|74112109|975|(ABE;-;@16;NG;TGG:CGG;W:R;)	ENST00000211998	975	R	TCCCGATGCAAGGACTGAGCCG
ENST00000215567|19|+|14564818|14564863|182|(ABE;-;@16;NGG;CTT:CCT;L:P;)	ENST00000215567	182	P	GAGAGGGTGATTGATGTAATAGG
ENST00000215567|19|+|14564818|14564863|182|(ABE;-;@16;NG;CTT:CCT;L:P;)	ENST00000215567	182	P	GAGAGGGTGATTGATGTAATAG
ENST00000215727|22|+|20786928|20786973|462|(ABE;-;@16;NGG;CTG:CCG;L:P;)	ENST00000215727	462	P	CAGCGGCATGAACCCCACCGTGG
ENST00000215727|22|+|20786928|20786973|462|(ABE;-;@17;NG;CTG:CCG;L:P;)	ENST00000215727	462	P	AGCGGCATGAACCCCACCGTGG
ENST00000215727|22|+|20786928|20786973|462|(ABE;-;@16;NG;CTG:CCG;L:P;)	ENST00000215727	462	P	CAGCGGCATGAACCCCACCGTG
ENST00000215727|22|+|20786928|20786973|462|(ABE;-;@14;NG;CTG:CCG;L:P;)	ENST00000215727	462	P	GACAGCGGCATGAACCCCACCG
ENST00000215730|22|+|20859089|20859134|1|(Target-AID;+;@17;NG;ACG:ATG;T:M;)	ENST00000215730	1	M	CCATGTCAGCTTACCCTAAAAG
ENST00000215739|22|+|20987525|20987570|122|(ABE;-;@16;NGG;TTG:TCG;L:S;)	ENST00000215739	122	S	GGCCGAGTGGTGGTAACGGGGGG
ENST00000215739|22|+|20987525|20987570|122|(ABE;-;@15;NGG;TTG:TCG;L:S;)	ENST00000215739	122	S	CGGCCGAGTGGTGGTAACGGGGG
ENST00000215739|22|+|20987525|20987570|122|(ABE;-;@14;NGG;TTG:TCG;L:S;)	ENST00000215739	122	S	ACGGCCGAGTGGTGGTAACGGGG
ENST00000215739|22|+|20987525|20987570|122|(ABE;-;@17;NG;TTG:TCG;L:S;)	ENST00000215739	122	S	GCCGAGTGGTGGTAACGGGGGG
ENST00000215739|22|+|20987525|20987570|122|(ABE;-;@16;NG;TTG:TCG;L:S;)	ENST00000215739	122	S	GGCCGAGTGGTGGTAACGGGGG
ENST00000215739|22|+|20987525|20987570|122|(ABE;-;@15;NG;TTG:TCG;L:S;)	ENST00000215739	122	S	CGGCCGAGTGGTGGTAACGGGG
ENST00000215739|22|+|20987525|20987570|122|(ABE;-;@14;NG;TTG:TCG;L:S;)	ENST00000215739	122	S	ACGGCCGAGTGGTGGTAACGGG
ENST00000215739|22|+|20988017|20988062|144|(ABE;-;@13;NG;TTT:TCT;F:S;)	ENST00000215739	144	S	CAAGTTAGAATTGGAATAAATG
ENST00000215739|22|+|20991664|20991709|284|(ABE;-;@13;NGG;TGC:CGC;C:R;)	ENST00000215739	284	R	CCGTAGCGCCGCTGCGGGGGTGG
ENST00000215739|22|+|20991664|20991709|284|(ABE;-;@14;NG;TGC:CGC;C:R;)	ENST00000215739	284	R	CGTAGCGCCGCTGCGGGGGTGG
ENST00000215739|22|+|20991664|20991709|284|(ABE;-;@13;NG;TGC:CGC;C:R;)	ENST00000215739	284	R	CCGTAGCGCCGCTGCGGGGGTG
ENST00000215739|22|+|20993944|20993989|466|(ABE;+;@17;NG;CAG:CGG;Q:R;)	ENST00000215739	466	R	CGCGGAGCCGCTGGCTTCGCAG
ENST00000215739|22|+|20993944|20993989|466|(ABE;+;@17;NGG;CAG:CGG;Q:R;)	ENST00000215739	466	R	CGCGGAGCCGCTGGCTTCGCAGG
ENST00000215739|22|+|20995843|20995888|688|(ABE;-;@13;NG;TGC:CGC;C:R;)	ENST00000215739	688	R	CTGGAGCGGGCGGCCAGGATAG
ENST00000215739|22|+|20996047|20996092|726|(ABE;-;@17;NG;TAT:TAC;Y:Y;)	ENST00000215739	726	Y	GATGTAGCGCAGCATGGACTCG
ENST00000215838|22|+|30615341|30615386|215|(ABE;-;@16;NG;TGG:CGG;W:R;)	ENST00000215838	215	R	CTCCGACCAGGGTTGAAGTTTG
ENST00000216194|22|+|40346540|40346585|2|(ABE;-;@13;NG;GTG:GCG;V:A;)	ENST00000216194	2	A	TCCAGCCGCCATCCCAACCCTG
ENST00000216194|22|+|40346660|40346705|42|(Target-AID;+;@17;NG;CTA:TTA;L:L;)	ENST00000216194	42	L	CAGCTGTGGCTGTGGCTGGCGG
ENST00000216194|22|+|40346660|40346705|42|(Target-AID;+;@19;NG;CTA:TTA;L:L;)	ENST00000216194	42	L	GCTGTGGCTGTGGCTGGCGGAG
ENST00000216194|22|+|40346660|40346705|42|(Target-AID;+;@19;NGG;CTA:TTA;L:L;)	ENST00000216194	42	L	GCTGTGGCTGTGGCTGGCGGAGG
ENST00000216194|22|+|40346660|40346705|42|(ABE;-;@15;NG;TTG:CTG;L:L;)	ENST00000216194	42	L	CCACAGCTGCCGCCATGTCCGG
ENST00000216194|22|+|40349870|40349915|72|(ABE;-;@15;NG;ATT:ATC;I:I;)	ENST00000216194	72	I	AAGTCGATGTTCTCCAGGTTTG
ENST00000216194|22|+|40349996|40350041|114|(Target-AID;+;@17;NG;CAT:TAT;H:Y;)	ENST00000216194	114	Y	TGCTATGTTGGAGACAATACTG
ENST00000216194|22|+|40354244|40354289|155|(ABE;-;@13;NG;TGG:CGG;W:R;)	ENST00000216194	155	R	GCAAGCCGAGAGATCACTCTGG
ENST00000216194|22|+|40360411|40360456|259|(Target-AID;-;@18;NG;CGG:CGA;R:R;)	ENST00000216194	259	R	TTTCGTGTATATGTCTGCCCTG
ENST00000216194|22|+|40360414|40360459|260|(Target-AID;-;@19;NG;GAA:AAA;E:K;)	ENST00000216194	260	K	TTTCGTGTATATGTCTGCCCTG
ENST00000216194|22|+|40361555|40361600|332|(ABE;-;@13;NGG;CTG:CCG;L:P;)	ENST00000216194	332	P	CTGTAGCGGGTCCATGACAAGGG
ENST00000216194|22|+|40361555|40361600|332|(ABE;-;@14;NG;CTG:CCG;L:P;)	ENST00000216194	332	P	TGTAGCGGGTCCATGACAAGGG
ENST00000216194|22|+|40361555|40361600|332|(ABE;-;@13;NG;CTG:CCG;L:P;)	ENST00000216194	332	P	CTGTAGCGGGTCCATGACAAGG
ENST00000216194|22|+|40364942|40364987|440|(ABE;-;@15;NG;TGT:CGT;C:R;)	ENST00000216194	440	R	GATACGCTCTATGAGGTCATTG
ENST00000216194|22|+|40364942|40364987|440|(ABE;+;@13;NG;CAT:CGT;H:R;)	ENST00000216194	440	R	ATAGAGCGTATCCAGGTTGATG
ENST00000216194|22|+|40365005|40365050|461|(Target-AID;+;@17;NG;CCT:TCT;P:S;)	ENST00000216194	461	S	CCTTCTTCTTTCACTGGTCGTG
ENST00000216194|22|+|40366459|40366504|486|(Target-AID;+;@17;NG;CAT:TAT;H:Y;)	ENST00000216194	486	Y	CCATATGAAAGCGTGATGAAGG
ENST00000216254|22|+|41515499|41515544|224|(ABE;+;@14;NG;CTA:CTG;L:L;)	ENST00000216254	224	L	GGAGCTGAAGTGCCCCAAGGTG
ENST00000216254|22|+|41515499|41515544|224|(Target-AID;+;@18;NG;CTA:TTA;L:L;)	ENST00000216254	224	L	AGCTGAAGTGCCCCAAGGTGAG
ENST00000216254|22|+|41515499|41515544|224|(Target-AID;+;@19;NG;CTA:TTA;L:L;)	ENST00000216254	224	L	GCTGAAGTGCCCCAAGGTGAGG
ENST00000216254|22|+|41515499|41515544|224|(Target-AID;+;@18;NGG;CTA:TTA;L:L;)	ENST00000216254	224	L	AGCTGAAGTGCCCCAAGGTGAGG
ENST00000216254|22|+|41515499|41515544|224|(Target-AID;+;@19;NGG;CTA:TTA;L:L;)	ENST00000216254	224	L	GCTGAAGTGCCCCAAGGTGAGGG
ENST00000216254|22|+|41515499|41515544|224|(ABE;-;@16;NG;TTG:CTG;L:L;)	ENST00000216254	224	L	TTCAGCTCCCAGGGGATCCCAG
ENST00000216254|22|+|41515499|41515544|224|(Target-AID;-;@18;NG;TTG:TTA;L:L;)	ENST00000216254	224	L	TTCAGCTCCCAGGGGATCCCAG
ENST00000216254|22|+|41522849|41522894|394|(ABE;+;@13;NG;GAG:GGG;E:G;)	ENST00000216254	394	G	GATATGGGGCGCTCAGCAGCTG
ENST00000216254|22|+|41526297|41526342|607|(ABE;-;@14;NGG;TGT:CGT;C:R;)	ENST00000216254	607	R	GCCCACGGAACTTGAGCCAGGGG
ENST00000216254|22|+|41526297|41526342|607|(ABE;-;@13;NGG;TGT:CGT;C:R;)	ENST00000216254	607	R	TGCCCACGGAACTTGAGCCAGGG
ENST00000216254|22|+|41526297|41526342|607|(ABE;-;@14;NG;TGT:CGT;C:R;)	ENST00000216254	607	R	GCCCACGGAACTTGAGCCAGGG
ENST00000216254|22|+|41526297|41526342|607|(ABE;-;@13;NG;TGT:CGT;C:R;)	ENST00000216254	607	R	TGCCCACGGAACTTGAGCCAGG
ENST00000216254|22|+|41527293|41527338|661|(ABE;+;@14;NG;AGA:GGA;R:G;)	ENST00000216254	661	G	GTGATCGGAGACGAGAACTACG
ENST00000216254|22|+|41527293|41527338|661|(ABE;+;@15;NG;AGA:GGA;R:G;)	ENST00000216254	661	G	TGATCGGAGACGAGAACTACGG
ENST00000216254|22|+|41527293|41527338|661|(ABE;+;@14;NGG;AGA:GGA;R:G;)	ENST00000216254	661	G	GTGATCGGAGACGAGAACTACGG
ENST00000216361|14|+|30878811|30878856|153|(ABE;+;@17;NG;GAA:GGA;E:G;)	ENST00000216361	153	G	GGGGACCTGTACGAGTCTATAG
ENST00000216361|14|+|30889740|30889785|607|(ABE;+;@13;NG;TAT:TGT;Y:C;)	ENST00000216361	607	C	GGCATTTGTAGAGATTTCTTAG
ENST00000216605|14|+|64411086|64411131|49|(ABE;-;@13;NG;TTC:TCC;F:S;)	ENST00000216605	49	S	AAGATTGGAATCATCTCTGTTG
ENST00000216605|14|+|64417904|64417949|173|(ABE;-;@17;NG;TGC:CGC;C:R;)	ENST00000216605	173	R	TGCGCCCAACCACCACAGCATG
ENST00000216639|14|+|96855328|96855373|235|(ABE;-;@17;NG;GGT:GGC;G:G;)	ENST00000216639	235	G	CACGCCATTGTGTGCATCGATG
ENST00000216639|14|+|96855328|96855373|235|(ABE;-;@14;NG;GGT:GGC;G:G;)	ENST00000216639	235	G	ACCCACGCCATTGTGTGCATCG
ENST00000216639|14|+|96860606|96860651|321|(ABE;-;@14;NG;TGT:CGT;C:R;)	ENST00000216639	321	R	TGTCACGTAAATTTTCATAAAG
ENST00000217961|X|+|7305086|7305131|341|(ABE;-;@16;NGG;TTG:TCG;L:S;)	ENST00000217961	341	S	GTCCGATGTGAAGTAGATGAGGG
ENST00000217961|X|+|7305086|7305131|341|(ABE;-;@15;NGG;TTG:TCG;L:S;)	ENST00000217961	341	S	GGTCCGATGTGAAGTAGATGAGG
ENST00000217961|X|+|7305086|7305131|341|(ABE;-;@17;NG;TTG:TCG;L:S;)	ENST00000217961	341	S	TCCGATGTGAAGTAGATGAGGG
ENST00000217961|X|+|7305086|7305131|341|(ABE;-;@16;NG;TTG:TCG;L:S;)	ENST00000217961	341	S	GTCCGATGTGAAGTAGATGAGG
ENST00000217961|X|+|7305086|7305131|341|(ABE;-;@15;NG;TTG:TCG;L:S;)	ENST00000217961	341	S	GGTCCGATGTGAAGTAGATGAG
ENST00000217961|X|+|7325334|7325379|372|(Target-AID;+;@17;NG;CGG:TGG;R:W;)	ENST00000217961	372	W	AACTGGGAAGGAGGTATCCGGG
ENST00000218099|X|+|139548433|139548478|162|(ABE;-;@15;NGG;TGA:CGA;*:R;)	ENST00000218099	162	R	AAGTCGATATCCCTCAGTACAGG
ENST00000218099|X|+|139548433|139548478|162|(ABE;-;@15;NG;TGA:CGA;*:R;)	ENST00000218099	162	R	AAGTCGATATCCCTCAGTACAG
ENST00000218099|X|+|139551090|139551135|191|(ABE;-;@13;NG;TGT:CGT;C:R;)	ENST00000218099	191	R	TCAGCACGGGTGAGCTTAGAAG
ENST00000218099|X|+|139551195|139551240|226|(ABE;-;@16;NG;TGG:CGG;W:R;)	ENST00000218099	226	R	ACCCGAGTGAAGTCATTAAATG
ENST00000218099|X|+|139551195|139551240|226|(ABE;+;@13;NG;CAG:CGG;Q:R;)	ENST00000218099	226	R	TTCACTCGGGTTGTTGGTGGAG
ENST00000218099|X|+|139561693|139561738|344|(Target-AID;+;@19;NG;ACC:ATC;T:I;)	ENST00000218099	344	I	ATCTTCCTCAAATTTGGATCTG
ENST00000218099|X|+|139561693|139561738|344|(Target-AID;+;@19;NGG;ACC:ATC;T:I;)	ENST00000218099	344	I	ATCTTCCTCAAATTTGGATCTGG
ENST00000218099|X|+|139561969|139562014|436|(ABE;-;@16;NG;GTA:GCA;V:A;)	ENST00000218099	436	A	CATTGCACACTCTTCACCCCAG
ENST00000218099|X|+|139561987|139562032|442|(ABE;+;@14;NG;AGA:GGA;R:G;)	ENST00000218099	442	G	AAATATGGAATATATACCAAGG
ENST00000218104|X|+|153725500|153725545|86|(ABE;-;@16;NG;GTT:GTC;V:V;)	ENST00000218104	86	V	ACAGGACCCGGGGGAACAGCAG
ENST00000218104|X|+|153726040|153726085|266|(ABE;+;@17;NG;AGG:GGG;R:G;)	ENST00000218104	266	G	TTCGGGGAGCTGGTGGCAGAGG
ENST00000218104|X|+|153726082|153726127|280|(ABE;-;@17;NG;TGC:CGC;C:R;)	ENST00000218104	280	R	AGCGCAGCTCCCCCTTCCGCCG
ENST00000218104|X|+|153726082|153726127|280|(ABE;-;@14;NG;TGC:CGC;C:R;)	ENST00000218104	280	R	TGTAGCGCAGCTCCCCCTTCCG
ENST00000218104|X|+|153726130|153726175|296|(Target-AID;+;@17;NG;CAT:TAT;H:Y;)	ENST00000218104	296	Y	TTCTATGGGGGCCATGAGGTGG
ENST00000218104|X|+|153726130|153726175|296|(Target-AID;+;@18;NG;CAT:TAT;H:Y;)	ENST00000218104	296	Y	TCTATGGGGGCCATGAGGTGGG
ENST00000218104|X|+|153726130|153726175|296|(Target-AID;+;@17;NGG;CAT:TAT;H:Y;)	ENST00000218104	296	Y	TTCTATGGGGGCCATGAGGTGGG
ENST00000218104|X|+|153726130|153726175|296|(Target-AID;+;@18;NGG;CAT:TAT;H:Y;)	ENST00000218104	296	Y	TCTATGGGGGCCATGAGGTGGGG
ENST00000218104|X|+|153726130|153726175|296|(Target-AID;-;@17;NG;TGT:TAT;C:Y;)	ENST00000218104	296	Y	CCATAGAAGGCGATCTCCTCCG
ENST00000218104|X|+|153736173|153736218|389|(ABE;+;@15;NG;CAC:CGC;H:R;)	ENST00000218104	389	R	TGCCCGCAACCTCCTGACAGCG
ENST00000218104|X|+|153736173|153736218|389|(ABE;+;@15;NGG;CAC:CGC;H:R;)	ENST00000218104	389	R	TGCCCGCAACCTCCTGACAGCGG
ENST00000218104|X|+|153736350|153736395|418|(ABE;-;@13;NG;TGG:CGG;W:R;)	ENST00000218104	418	R	TGCACCCGGGCTGTGTAGCCAG
ENST00000218104|X|+|153737137|153737182|466|(ABE;-;@13;NG;TAG:CAG;*:Q;)	ENST00000218104	466	Q	ACCACCTGGCCTGCAGAGACAG
ENST00000218104|X|+|153737170|153737215|477|(ABE;+;@14;NG;AAG:GAG;K:E;)	ENST00000218104	477	E	ATCTGCGAGAACATCCCCATCG
ENST00000218104|X|+|153740124|153740169|515|(ABE;-;@13;NG;TTC:TCC;F:S;)	ENST00000218104	515	S	GAACAGGGAGCTCTTGCCGCAG
ENST00000218104|X|+|153740133|153740178|518|(ABE;-;@15;NG;TGG:CGG;W:R;)	ENST00000218104	518	R	GATCCGGAACAGGGAGCTCTTG
ENST00000218104|X|+|153740133|153740178|518|(ABE;+;@17;NG;CAG:CGG;Q:R;)	ENST00000218104	518	R	TCCGGATCCTGGGTGGGCTCTG
ENST00000218104|X|+|153740133|153740178|518|(ABE;+;@17;NGG;CAG:CGG;Q:R;)	ENST00000218104	518	R	TCCGGATCCTGGGTGGGCTCTGG
ENST00000218104|X|+|153740577|153740622|554|(ABE;-;@13;NG;TGT:CGT;C:R;)	ENST00000218104	554	R	TGGTCACGCAGGGAGCCCACAG
ENST00000218104|X|+|153742985|153743030|601|(ABE;+;@15;NG;TAG:TGG;*:W;)	ENST00000218104	601	W	TGACTGGAAGGACGTCCTGTCG
ENST00000218104|X|+|153742985|153743030|601|(ABE;+;@15;NGG;TAG:TGG;*:W;)	ENST00000218104	601	W	TGACTGGAAGGACGTCCTGTCGG
ENST00000218104|X|+|153742985|153743030|601|(ABE;+;@14;NG;TGA:TGG;*:W;)	ENST00000218104	601	W	TGACTGGAAGGACGTCCTGTCG
ENST00000218104|X|+|153742985|153743030|601|(ABE;+;@14;NGG;TGA:TGG;*:W;)	ENST00000218104	601	W	TGACTGGAAGGACGTCCTGTCGG
ENST00000218104|X|+|153743009|153743054|609|(ABE;+;@14;NG;AAG:GAG;K:E;)	ENST00000218104	609	E	GGTGGCGAGAAGCAGAGAATCG
ENST00000218104|X|+|153743009|153743054|609|(ABE;+;@15;NG;AAG:GAG;K:E;)	ENST00000218104	609	E	GTGGCGAGAAGCAGAGAATCGG
ENST00000218104|X|+|153743009|153743054|609|(ABE;+;@14;NGG;AAG:GAG;K:E;)	ENST00000218104	609	E	GGTGGCGAGAAGCAGAGAATCGG
ENST00000218104|X|+|153743033|153743078|617|(ABE;+;@15;NG;CAC:CGC;H:R;)	ENST00000218104	617	R	GGCCCGCATGTTCTACCACAGG
ENST00000218104|X|+|153743033|153743078|617|(ABE;+;@17;NG;CAC:CGC;H:R;)	ENST00000218104	617	R	CCCGCATGTTCTACCACAGGTG
ENST00000218104|X|+|153743492|153743537|673|(Target-AID;+;@19;NG;CTC:TTC;L:F;)	ENST00000218104	673	F	GTTCGATGGGGAGGGCGGCTGG
ENST00000218104|X|+|153743492|153743537|673|(ABE;-;@13;NG;TTT:TTC;F:F;)	ENST00000218104	673	F	CCCCATCGAACTGTAGCAAGTG
ENST00000218224|X|+|48902994|48903039|244|(ABE;-;@15;NGG;CTG:CCG;L:P;)	ENST00000218224	244	P	GATACGGCCGCTGCTGGAAGAGG
ENST00000218224|X|+|48902994|48903039|244|(ABE;-;@15;NG;CTG:CCG;L:P;)	ENST00000218224	244	P	GATACGGCCGCTGCTGGAAGAG
ENST00000218340|X|+|46853709|46853754|120|(ABE;-;@15;NG;TGA:CGA;*:R;)	ENST00000218340	120	R	ATCTCGCACACGAAATTGTTGG
ENST00000218867|13|+|23250656|23250701|116|(ABE;+;@15;NG;CAC:CGC;H:R;)	ENST00000218867	116	R	TGCGCGCAACTCAGAAGGGGAG
ENST00000218867|13|+|23250656|23250701|116|(ABE;+;@15;NGG;CAC:CGC;H:R;)	ENST00000218867	116	R	TGCGCGCAACTCAGAAGGGGAGG
ENST00000219070|16|+|55483034|55483079|101|(ABE;+;@13;NG;CAC:CGC;H:R;)	ENST00000219070	101	R	AAGCCACGCTGCGGCAACCCAG
ENST00000219070|16|+|55485285|55485330|180|(ABE;+;@14;NG;AAT:GAT;N:D;)	ENST00000219070	180	D	CATGGCGATGGATACCCCTTTG
ENST00000219070|16|+|55485285|55485330|180|(ABE;+;@17;NG;AAT:GAT;N:D;)	ENST00000219070	180	D	GGCGATGGATACCCCTTTGACG
ENST00000219070|16|+|55485285|55485330|180|(ABE;+;@17;NGG;AAT:GAT;N:D;)	ENST00000219070	180	D	GGCGATGGATACCCCTTTGACGG
ENST00000219070|16|+|55491808|55491853|404|(ABE;+;@16;NG;AAG:GAG;K:E;)	ENST00000219070	404	E	CCACGAGTTTGGCCACGCCATG
ENST00000219070|16|+|55491808|55491853|404|(ABE;+;@17;NG;AAG:GAG;K:E;)	ENST00000219070	404	E	CACGAGTTTGGCCACGCCATGG
ENST00000219070|16|+|55491808|55491853|404|(ABE;+;@16;NGG;AAG:GAG;K:E;)	ENST00000219070	404	E	CCACGAGTTTGGCCACGCCATGG
ENST00000219070|16|+|55491808|55491853|404|(ABE;+;@17;NGG;AAG:GAG;K:E;)	ENST00000219070	404	E	CACGAGTTTGGCCACGCCATGGG
ENST00000219097|16|+|46689684|46689729|1|(Target-AID;-;@17;NG;GTG:ATG;V:M;)	ENST00000219097	1	M	CCATGGCGCCGGCACTAAAGCG
ENST00000219097|16|+|46689684|46689729|1|(Target-AID;+;@17;NG;ACG:ATG;T:M;)	ENST00000219097	1	M	CCATGGGGTCGGAGCTGATCGG
ENST00000219097|16|+|46689684|46689729|1|(Target-AID;+;@17;NGG;ACG:ATG;T:M;)	ENST00000219097	1	M	CCATGGGGTCGGAGCTGATCGGG
ENST00000219240|16|+|72012061|72012106|19|(ABE;+;@16;NG;GAA:GGA;E:G;)	ENST00000219240	19	G	GGGGGAGGAGGACTTCTCTTCG
ENST00000219240|16|+|72017021|72017066|152|(ABE;+;@13;NG;AGG:GGG;R:G;)	ENST00000219240	152	G	CAGTCACGGGCTTTCAGTGGTG
ENST00000219240|16|+|72017021|72017066|152|(ABE;+;@14;NG;AGG:GGG;R:G;)	ENST00000219240	152	G	AGTCACGGGCTTTCAGTGGTGG
ENST00000219240|16|+|72017021|72017066|152|(ABE;+;@13;NGG;AGG:GGG;R:G;)	ENST00000219240	152	G	CAGTCACGGGCTTTCAGTGGTGG
ENST00000219240|16|+|72021179|72021224|199|(ABE;-;@15;NG;TGC:CGC;C:R;)	ENST00000219240	199	R	TACGCGCACCCCTTCTGCGTAG
ENST00000219240|16|+|72023499|72023544|341|(ABE;-;@13;NG;GTG:GCG;V:A;)	ENST00000219240	341	A	CTCCAGCGCGTCCTGCCCGCTG
ENST00000219240|16|+|72023514|72023559|346|(ABE;-;@15;NG;TGG:CGG;W:R;)	ENST00000219240	346	R	TGCCCGGATCTTCTCCAGCGCG
ENST00000219476|16|+|2055394|2055439|166|(ABE;-;@17;NGG;TAG:CAG;*:Q;)	ENST00000219476	166	Q	ACTGCAGGACAAAGTCAGCTGGG
ENST00000219476|16|+|2055394|2055439|166|(ABE;-;@16;NGG;TAG:CAG;*:Q;)	ENST00000219476	166	Q	CACTGCAGGACAAAGTCAGCTGG
ENST00000219476|16|+|2055394|2055439|166|(ABE;-;@17;NG;TAG:CAG;*:Q;)	ENST00000219476	166	Q	ACTGCAGGACAAAGTCAGCTGG
ENST00000219476|16|+|2055394|2055439|166|(ABE;-;@16;NG;TAG:CAG;*:Q;)	ENST00000219476	166	Q	CACTGCAGGACAAAGTCAGCTG
ENST00000219476|16|+|2055394|2055439|166|(ABE;-;@13;NG;TAG:CAG;*:Q;)	ENST00000219476	166	Q	ATCCACTGCAGGACAAAGTCAG
ENST00000219476|16|+|2056631|2056676|220|(ABE;-;@17;NG;TAG:CAG;*:Q;)	ENST00000219476	220	Q	CCTGCAGGGAGACCTGGTGGAG
ENST00000219476|16|+|2056631|2056676|220|(ABE;-;@15;NG;TAG:CAG;*:Q;)	ENST00000219476	220	Q	CACCTGCAGGGAGACCTGGTGG
ENST00000219476|16|+|2060768|2060813|366|(ABE;+;@13;NG;AAA:GAA;K:E;)	ENST00000219476	366	E	CATCATCGAACGGCTCCTTCAG
ENST00000219476|16|+|2061924|2061969|399|(ABE;+;@16;NG;AAG:GAG;K:E;)	ENST00000219476	399	E	GAACGAGTTCCACGGGTCTCAG
ENST00000219476|16|+|2061924|2061969|399|(ABE;+;@17;NG;AAG:GAG;K:E;)	ENST00000219476	399	E	AACGAGTTCCACGGGTCTCAGG
ENST00000219476|16|+|2061924|2061969|399|(ABE;+;@16;NGG;AAG:GAG;K:E;)	ENST00000219476	399	E	GAACGAGTTCCACGGGTCTCAGG
ENST00000219476|16|+|2061972|2062017|415|(ABE;-;@15;NG;GTG:GCG;V:A;)	ENST00000219476	415	A	GGTCCGCACATCTCTCCACCAG
ENST00000219476|16|+|2062538|2062583|441|(ABE;+;@15;NG;TAG:TGG;*:W;)	ENST00000219476	441	W	CGGCTGGATTCAGAACCTGCAG
ENST00000219476|16|+|2062538|2062583|441|(ABE;+;@16;NG;TAG:TGG;*:W;)	ENST00000219476	441	W	GGCTGGATTCAGAACCTGCAGG
ENST00000219476|16|+|2062538|2062583|441|(ABE;+;@15;NGG;TAG:TGG;*:W;)	ENST00000219476	441	W	CGGCTGGATTCAGAACCTGCAGG
ENST00000219476|16|+|2062538|2062583|441|(ABE;+;@14;NG;TGA:TGG;*:W;)	ENST00000219476	441	W	CGGCTGGATTCAGAACCTGCAG
ENST00000219476|16|+|2062538|2062583|441|(ABE;+;@15;NG;TGA:TGG;*:W;)	ENST00000219476	441	W	GGCTGGATTCAGAACCTGCAGG
ENST00000219476|16|+|2062538|2062583|441|(ABE;+;@17;NG;TGA:TGG;*:W;)	ENST00000219476	441	W	CTGGATTCAGAACCTGCAGGCG
ENST00000219476|16|+|2062538|2062583|441|(ABE;+;@14;NGG;TGA:TGG;*:W;)	ENST00000219476	441	W	CGGCTGGATTCAGAACCTGCAGG
ENST00000219476|16|+|2062960|2063005|458|(ABE;-;@16;NG;TGA:CGA;*:R;)	ENST00000219476	458	R	CCTCGGGACTCGCTCCTGCGGG
ENST00000219476|16|+|2062966|2063011|460|(ABE;+;@13;NG;ACC:GCC;T:A;)	ENST00000219476	460	A	CCGAGGCGCCGTGCGCATCAAG
ENST00000219476|16|+|2062966|2063011|460|(ABE;+;@13;NGG;ACC:GCC;T:A;)	ENST00000219476	460	A	CCGAGGCGCCGTGCGCATCAAGG
ENST00000219476|16|+|2062984|2063029|466|(Target-AID;+;@18;NG;CCG:CTG;P:L;)	ENST00000219476	466	L	GCTGGACGTGCTGTCCTTTGTG
ENST00000219476|16|+|2063020|2063065|478|(ABE;-;@14;NG;TAG:CAG;*:Q;)	ENST00000219476	478	Q	AGAACTGCCTGTTGATGAGCAG
ENST00000219476|16|+|2064253|2064298|483|(ABE;+;@16;NG;AAG:GAG;K:E;)	ENST00000219476	483	E	GGAGGAGCTGATTAACTCAGTG
ENST00000219476|16|+|2064253|2064298|483|(ABE;+;@17;NG;AAG:GAG;K:E;)	ENST00000219476	483	E	GAGGAGCTGATTAACTCAGTGG
ENST00000219476|16|+|2064253|2064298|483|(ABE;+;@16;NGG;AAG:GAG;K:E;)	ENST00000219476	483	E	GGAGGAGCTGATTAACTCAGTGG
ENST00000219476|16|+|2064280|2064325|492|(ABE;-;@13;NG;TAG:CAG;*:Q;)	ENST00000219476	492	Q	GAGAGCTGCGAGATGACCACTG
ENST00000219476|16|+|2064382|2064427|526|(ABE;-;@15;NG;AGT:AGC;S:S;)	ENST00000219476	526	S	AGCAGGCTGTTGAAGTGGTGTG
ENST00000219476|16|+|2064382|2064427|526|(ABE;-;@13;NG;AGT:AGC;S:S;)	ENST00000219476	526	S	CCAGCAGGCTGTTGAAGTGGTG
ENST00000219476|16|+|2070464|2070509|583|(ABE;+;@14;NG;ACC:GCC;T:A;)	ENST00000219476	583	A	AGCCACGCCACGCGTGTGTATG
ENST00000219476|16|+|2070464|2070509|583|(ABE;+;@16;NG;ACC:GCC;T:A;)	ENST00000219476	583	A	CCACGCCACGCGTGTGTATGAG
ENST00000219476|16|+|2070521|2070566|602|(ABE;-;@16;NGG;TAT:TAC;Y:Y;)	ENST00000219476	602	Y	GGGTGTAGCTGTGCTTGTAGTGG
ENST00000219476|16|+|2070521|2070566|602|(ABE;-;@17;NG;TAT:TAC;Y:Y;)	ENST00000219476	602	Y	GGTGTAGCTGTGCTTGTAGTGG
ENST00000219476|16|+|2070521|2070566|602|(ABE;-;@16;NG;TAT:TAC;Y:Y;)	ENST00000219476	602	Y	GGGTGTAGCTGTGCTTGTAGTG
ENST00000219476|16|+|2070536|2070581|607|(ABE;+;@14;NG;GCA:GCG;A:A;)	ENST00000219476	607	A	AATCGCGAGCAGCATCCGGCTG
ENST00000219476|16|+|2070548|2070593|611|(ABE;-;@16;NGG;TGG:CGG;W:R;)	ENST00000219476	611	R	AGCCGGATGCTGCTCGCGATTGG
ENST00000219476|16|+|2070548|2070593|611|(ABE;-;@17;NG;TGG:CGG;W:R;)	ENST00000219476	611	R	GCCGGATGCTGCTCGCGATTGG
ENST00000219476|16|+|2070548|2070593|611|(ABE;-;@16;NG;TGG:CGG;W:R;)	ENST00000219476	611	R	AGCCGGATGCTGCTCGCGATTG
ENST00000219476|16|+|2071506|2071551|620|(Target-AID;+;@19;NG;CTA:TTA;L:L;)	ENST00000219476	620	L	GCTGCTGCGGGCCGACTCACTG
ENST00000219476|16|+|2071506|2071551|620|(Target-AID;-;@17;NGG;TTG:TTA;L:L;)	ENST00000219476	620	L	CAGCAGCAACAGGAAGTCAAAGG
ENST00000219476|16|+|2071506|2071551|620|(Target-AID;-;@18;NG;TTG:TTA;L:L;)	ENST00000219476	620	L	AGCAGCAACAGGAAGTCAAAGG
ENST00000219476|16|+|2071506|2071551|620|(Target-AID;-;@17;NG;TTG:TTA;L:L;)	ENST00000219476	620	L	CAGCAGCAACAGGAAGTCAAAG
ENST00000219476|16|+|2071512|2071557|622|(ABE;-;@15;NG;TGG:CGG;W:R;)	ENST00000219476	622	R	GGCCCGCAGCAGCAACAGGAAG
ENST00000219476|16|+|2071575|2071620|643|(ABE;-;@17;NG;TAT:TAC;Y:Y;)	ENST00000219476	643	Y	GCAGTAGGGGCTGAACCGCACG
ENST00000219476|16|+|2071575|2071620|643|(ABE;-;@13;NG;TAT:TAC;Y:Y;)	ENST00000219476	643	Y	AGACGCAGTAGGGGCTGAACCG
ENST00000219476|16|+|2071901|2071946|696|(ABE;+;@14;NG;TAC:TGC;Y:C;)	ENST00000219476	696	C	TGCAGTGCTTGAAGCAGGTGAG
ENST00000219476|16|+|2072228|2072273|703|(ABE;+;@15;NG;TAG:TGG;*:W;)	ENST00000219476	703	W	TGACTGGAAGGTGCTGAAGCTG
ENST00000219476|16|+|2072228|2072273|703|(ABE;+;@15;NGG;TAG:TGG;*:W;)	ENST00000219476	703	W	TGACTGGAAGGTGCTGAAGCTGG
ENST00000219476|16|+|2072228|2072273|703|(ABE;+;@14;NG;TGA:TGG;*:W;)	ENST00000219476	703	W	TGACTGGAAGGTGCTGAAGCTG
ENST00000219476|16|+|2072228|2072273|703|(ABE;+;@14;NGG;TGA:TGG;*:W;)	ENST00000219476	703	W	TGACTGGAAGGTGCTGAAGCTGG
ENST00000219476|16|+|2072315|2072360|732|(ABE;-;@13;NGG;TAG:CAG;*:Q;)	ENST00000219476	732	Q	CACAGCTGGTCCACACTGCAAGG
ENST00000219476|16|+|2072315|2072360|732|(ABE;-;@13;NG;TAG:CAG;*:Q;)	ENST00000219476	732	Q	CACAGCTGGTCCACACTGCAAG
ENST00000219476|16|+|2072932|2072977|776|(ABE;-;@15;NG;TAT:TAC;Y:Y;)	ENST00000219476	776	Y	TTATGGTAAGAGATTAATGCTG
ENST00000219476|16|+|2074247|2074292|809|(ABE;-;@14;NG;TCT:TCC;S:S;)	ENST00000219476	809	S	GCAGATGGACAAGGCCACGACG
ENST00000219476|16|+|2074349|2074394|843|(Target-AID;+;@17;NG;CCG:CTG;P:L;)	ENST00000219476	843	L	CACTGCTGGAGTTCCTGTCCAG
ENST00000219476|16|+|2074349|2074394|843|(Target-AID;+;@19;NG;CCG:CTG;P:L;)	ENST00000219476	843	L	CTGCTGGAGTTCCTGTCCAGTG
ENST00000219476|16|+|2075809|2075854|860|(Target-AID;+;@19;NG;TTC:TTT;F:F;)	ENST00000219476	860	F	TTGCCGCGGAGCAGTATGCCAG
ENST00000219476|16|+|2075863|2075908|878|(ABE;-;@14;NGG;TCC:CCC;S:P;)	ENST00000219476	878	P	TGGAGGGGTTGGTGTACGGCAGG
ENST00000219476|16|+|2075863|2075908|878|(ABE;-;@14;NG;TCC:CCC;S:P;)	ENST00000219476	878	P	TGGAGGGGTTGGTGTACGGCAG
ENST00000219476|16|+|2076071|2076116|889|(ABE;-;@13;NG;GTC:GCC;V:A;)	ENST00000219476	889	A	GTGATGGGCCAGACACACGATG
ENST00000219476|16|+|2076092|2076137|896|(ABE;+;@17;NG;TGA:TGG;*:W;)	ENST00000219476	896	W	GTGGTTCATCAGGTGCCGCCTG
ENST00000219476|16|+|2079167|2079212|1042|(ABE;+;@14;NG;CCA:CCG;P:P;)	ENST00000219476	1042	P	TGTCCCGAAGAGGTCCAGGCGG
ENST00000219476|16|+|2079318|2079363|1066|(Target-AID;+;@17;NG;CCT:CTT;P:L;)	ENST00000219476	1066	L	AGCTTGTCACTGTGACGACAAG
ENST00000219476|16|+|2079644|2079689|1132|(ABE;-;@15;NG;TTG:TCG;L:S;)	ENST00000219476	1132	S	CACCCGACATGGAACGGACCCG
ENST00000219476|16|+|2080187|2080232|1148|(ABE;-;@17;NGG;TAG:CAG;*:Q;)	ENST00000219476	1148	Q	ACTGGGAGGCCGGCACGTCCAGG
ENST00000219476|16|+|2080187|2080232|1148|(ABE;-;@17;NG;TAG:CAG;*:Q;)	ENST00000219476	1148	Q	ACTGGGAGGCCGGCACGTCCAG
ENST00000219476|16|+|2080220|2080265|1159|(ABE;+;@13;NG;CAG:CGG;Q:R;)	ENST00000219476	1159	R	GGACCACGGACTGCACCAGCCG
ENST00000219476|16|+|2080277|2080322|1178|(ABE;-;@15;NG;TAG:CAG;*:Q;)	ENST00000219476	1178	Q	CTCCTGCACAGGAACCCGGGTG
ENST00000219476|16|+|2080343|2080388|1200|(ABE;+;@16;NG;CAG:CGG;Q:R;)	ENST00000219476	1200	R	GTCCGGAGGCCCACAGGTACTG
ENST00000219476|16|+|2080343|2080388|1200|(ABE;+;@17;NG;CAG:CGG;Q:R;)	ENST00000219476	1200	R	TCCGGAGGCCCACAGGTACTGG
ENST00000219476|16|+|2080343|2080388|1200|(ABE;+;@16;NGG;CAG:CGG;Q:R;)	ENST00000219476	1200	R	GTCCGGAGGCCCACAGGTACTGG
ENST00000219476|16|+|2080343|2080388|1200|(ABE;+;@17;NGG;CAG:CGG;Q:R;)	ENST00000219476	1200	R	TCCGGAGGCCCACAGGTACTGGG
ENST00000219476|16|+|2081584|2081629|1208|(ABE;+;@13;NG;TAG:TGG;*:W;)	ENST00000219476	1208	W	ACCAGCTGGCTGATGAGCCTGG
ENST00000219476|16|+|2083702|2083747|1305|(ABE;-;@16;NG;CTG:CCG;L:P;)	ENST00000219476	1305	P	GCCCGGACTTCCCTCCTCCATG
ENST00000219476|16|+|2083756|2083801|1323|(ABE;+;@13;NG;GCA:GCG;A:A;)	ENST00000219476	1323	A	AGGCAGCGCTAGGCATGGACAG
ENST00000219476|16|+|2083756|2083801|1323|(ABE;+;@14;NG;GCA:GCG;A:A;)	ENST00000219476	1323	A	GGCAGCGCTAGGCATGGACAGG
ENST00000219476|16|+|2083756|2083801|1323|(ABE;+;@16;NG;GCA:GCG;A:A;)	ENST00000219476	1323	A	CAGCGCTAGGCATGGACAGGCG
ENST00000219476|16|+|2083756|2083801|1323|(ABE;+;@13;NGG;GCA:GCG;A:A;)	ENST00000219476	1323	A	AGGCAGCGCTAGGCATGGACAGG
ENST00000219476|16|+|2083774|2083819|1329|(ABE;+;@17;NG;CAC:CGC;H:R;)	ENST00000219476	1329	R	GGCGCACGGATGCCTACAGCAG
ENST00000219476|16|+|2083774|2083819|1329|(ABE;+;@17;NGG;CAC:CGC;H:R;)	ENST00000219476	1329	R	GGCGCACGGATGCCTACAGCAGG
ENST00000219476|16|+|2083777|2083822|1330|(ABE;-;@13;NG;ATG:ACG;M:T;)	ENST00000219476	1330	T	GGCATCCGTGCGCCTGTCCATG
ENST00000219476|16|+|2084275|2084320|1359|(ABE;-;@14;NG;ATT:ATC;I:I;)	ENST00000219476	1359	I	TCGCTCGATGGGGATGCCCCTG
ENST00000219476|16|+|2084383|2084428|1395|(ABE;-;@16;NGG;TAG:CAG;*:Q;)	ENST00000219476	1395	Q	TCCTGCAGAGTCTGCAGCTCGGG
ENST00000219476|16|+|2084383|2084428|1395|(ABE;-;@15;NGG;TAG:CAG;*:Q;)	ENST00000219476	1395	Q	GTCCTGCAGAGTCTGCAGCTCGG
ENST00000219476|16|+|2084383|2084428|1395|(ABE;-;@16;NG;TAG:CAG;*:Q;)	ENST00000219476	1395	Q	TCCTGCAGAGTCTGCAGCTCGG
ENST00000219476|16|+|2084383|2084428|1395|(ABE;-;@15;NG;TAG:CAG;*:Q;)	ENST00000219476	1395	Q	GTCCTGCAGAGTCTGCAGCTCG
ENST00000219476|16|+|2084395|2084440|1399|(ABE;+;@17;NG;AGG:GGG;R:G;)	ENST00000219476	1399	G	CTCGGGGACCCTGGGGACAAGG
ENST00000219476|16|+|2084467|2084512|1423|(ABE;+;@15;NG;CTA:CTG;L:L;)	ENST00000219476	1423	L	ACCCTGGACGGGGAAAGTGCTG
ENST00000219476|16|+|2084467|2084512|1423|(Target-AID;-;@19;NGG;TTG:TTA;L:L;)	ENST00000219476	1423	L	CCAGGGTCCCTGACTGTGACCGG
ENST00000219476|16|+|2084467|2084512|1423|(Target-AID;-;@19;NG;TTG:TTA;L:L;)	ENST00000219476	1423	L	CCAGGGTCCCTGACTGTGACCG
ENST00000219476|16|+|2084467|2084512|1423|(ABE;-;@13;NG;TTG:CTG;L:L;)	ENST00000219476	1423	L	CCGTCCAGGGTCCCTGACTGTG
ENST00000219476|16|+|2084942|2084987|1503|(ABE;-;@15;NG;TAG:CAG;*:Q;)	ENST00000219476	1503	Q	GAGCTGCAGGAACACGAAACTG
ENST00000219476|16|+|2084969|2085014|1512|(ABE;-;@13;NGG;GAT:GAC;D:D;)	ENST00000219476	1512	D	TTGACTCGTCGCCAAAGAAGGGG
ENST00000219476|16|+|2084969|2085014|1512|(ABE;-;@13;NG;GAT:GAC;D:D;)	ENST00000219476	1512	D	TTGACTCGTCGCCAAAGAAGGG
ENST00000219476|16|+|2085211|2085256|1525|(ABE;-;@17;NG;TAG:CAG;*:Q;)	ENST00000219476	1525	Q	ACTGTGACTGTGGCACACAGAG
ENST00000219476|16|+|2085232|2085277|1532|(ABE;-;@15;NGG;TAG:CAG;*:Q;)	ENST00000219476	1532	Q	GAGCTGCACCGACCGCTCAAAGG
ENST00000219476|16|+|2085232|2085277|1532|(ABE;-;@16;NG;TAG:CAG;*:Q;)	ENST00000219476	1532	Q	AGCTGCACCGACCGCTCAAAGG
ENST00000219476|16|+|2085232|2085277|1532|(ABE;-;@15;NG;TAG:CAG;*:Q;)	ENST00000219476	1532	Q	GAGCTGCACCGACCGCTCAAAG
ENST00000219476|16|+|2085283|2085328|1549|(Target-AID;-;@19;NGG;TGT:TAT;C:Y;)	ENST00000219476	1549	Y	ATACAGGACGGCGATCTTGTGGG
ENST00000219476|16|+|2085283|2085328|1549|(Target-AID;-;@19;NG;TGT:TAT;C:Y;)	ENST00000219476	1549	Y	ATACAGGACGGCGATCTTGTGG
ENST00000219476|16|+|2086252|2086297|1582|(ABE;-;@14;NG;ATT:ATC;I:I;)	ENST00000219476	1582	I	CAGCTCGATGAGCCGGCCCAGG
ENST00000219476|16|+|2086255|2086300|1583|(ABE;+;@16;NG;AAG:GAG;K:E;)	ENST00000219476	1583	E	CATCGAGCTGAAGGACTGCCAG
ENST00000219476|16|+|2086727|2086772|1623|(ABE;-;@13;NG;ATC:ACC;I:T;)	ENST00000219476	1623	T	CATCAGGGTGGCGATGTGGAAG
ENST00000219476|16|+|2086841|2086886|1661|(ABE;-;@14;NG;ACT:ACC;T:T;)	ENST00000219476	1661	T	CTTGATGGTGCCAAGCTTGAAG
ENST00000219476|16|+|2087874|2087919|1675|(ABE;-;@13;NG;CTG:CCG;L:P;)	ENST00000219476	1675	P	GTCCAGCGGGGTGACGATCACG
ENST00000219476|16|+|2087877|2087922|1676|(ABE;+;@17;NG;CTA:CTG;L:L;)	ENST00000219476	1676	L	GCTGGACTACGAGTGCAACCTG
ENST00000219476|16|+|2087877|2087922|1676|(Target-AID;+;@19;NG;CTA:TTA;L:L;)	ENST00000219476	1676	L	GCTGGACTACGAGTGCAACCTG
ENST00000219476|16|+|2087877|2087922|1676|(ABE;+;@17;NGG;CTA:CTG;L:L;)	ENST00000219476	1676	L	GCTGGACTACGAGTGCAACCTGG
ENST00000219476|16|+|2087877|2087922|1676|(Target-AID;+;@19;NGG;CTA:TTA;L:L;)	ENST00000219476	1676	L	GCTGGACTACGAGTGCAACCTGG
ENST00000219476|16|+|2087877|2087922|1676|(Target-AID;-;@19;NGG;TTG:TTA;L:L;)	ENST00000219476	1676	L	CCAGCGGGGTGACGATCACGTGG
ENST00000219476|16|+|2087877|2087922|1676|(Target-AID;-;@19;NG;TTG:TTA;L:L;)	ENST00000219476	1676	L	CCAGCGGGGTGACGATCACGTG
ENST00000219476|16|+|2087877|2087922|1676|(ABE;-;@15;NG;TTG:CTG;L:L;)	ENST00000219476	1676	L	GTCCAGCGGGGTGACGATCACG
ENST00000219476|16|+|2088049|2088094|1698|(ABE;-;@13;NGG;AGT:AGC;S:S;)	ENST00000219476	1698	S	TGGCCACGCTGGTGTCCACAAGG
ENST00000219476|16|+|2088049|2088094|1698|(ABE;-;@14;NG;AGT:AGC;S:S;)	ENST00000219476	1698	S	GGCCACGCTGGTGTCCACAAGG
ENST00000219476|16|+|2088049|2088094|1698|(ABE;-;@13;NG;AGT:AGC;S:S;)	ENST00000219476	1698	S	TGGCCACGCTGGTGTCCACAAG
ENST00000219476|16|+|2088061|2088106|1702|(ABE;-;@17;NG;ATT:ATC;I:I;)	ENST00000219476	1702	I	CACGATCTTGGCCACGCTGGTG
ENST00000219476|16|+|2088094|2088139|1713|(ABE;+;@16;NG;CAC:CGC;H:R;)	ENST00000219476	1713	R	GCCCGCCAGATGGCCCTGCACG
ENST00000219476|16|+|2088097|2088142|1714|(ABE;-;@13;NGG;TAG:CAG;*:Q;)	ENST00000219476	1714	Q	GCCATCTGGCGGGCCACGAAGGG
ENST00000219476|16|+|2088097|2088142|1714|(ABE;-;@13;NG;TAG:CAG;*:Q;)	ENST00000219476	1714	Q	GCCATCTGGCGGGCCACGAAGG
ENST00000219476|16|+|2088106|2088151|1717|(Target-AID;+;@18;NG;CCG:CTG;P:L;)	ENST00000219476	1717	L	CCTGCACGCAAATGTGAGTGGG
ENST00000219476|16|+|2088106|2088151|1717|(Target-AID;+;@19;NG;CCG:CTG;P:L;)	ENST00000219476	1717	L	CTGCACGCAAATGTGAGTGGGG
ENST00000219476|16|+|2088106|2088151|1717|(Target-AID;+;@18;NGG;CCG:CTG;P:L;)	ENST00000219476	1717	L	CCTGCACGCAAATGTGAGTGGGG
ENST00000219476|16|+|2088106|2088151|1717|(Target-AID;+;@19;NGG;CCG:CTG;P:L;)	ENST00000219476	1717	L	CTGCACGCAAATGTGAGTGGGGG
ENST00000219476|16|+|2088214|2088259|1724|(ABE;-;@13;NGG;TAG:CAG;*:Q;)	ENST00000219476	1724	Q	TGCACCTGTGAGGCCATCTGGGG
ENST00000219476|16|+|2088214|2088259|1724|(ABE;-;@17;NG;TAG:CAG;*:Q;)	ENST00000219476	1724	Q	CCTGTGAGGCCATCTGGGGACG
ENST00000219476|16|+|2088214|2088259|1724|(ABE;-;@13;NG;TAG:CAG;*:Q;)	ENST00000219476	1724	Q	TGCACCTGTGAGGCCATCTGGG
ENST00000219476|16|+|2088262|2088307|1740|(ABE;+;@14;NG;TAG:TGG;*:W;)	ENST00000219476	1740	W	CCAAGTGGATTGCCCGGCTCCG
ENST00000219476|16|+|2088262|2088307|1740|(ABE;+;@13;NG;TGA:TGG;*:W;)	ENST00000219476	1740	W	CCAAGTGGATTGCCCGGCTCCG
ENST00000219476|16|+|2088271|2088316|1743|(ABE;-;@17;NGG;TGG:CGG;W:R;)	ENST00000219476	1743	R	GCCGGGCAATCCACTTGGAGGGG
ENST00000219476|16|+|2088271|2088316|1743|(ABE;-;@17;NG;TGG:CGG;W:R;)	ENST00000219476	1743	R	GCCGGGCAATCCACTTGGAGGG
ENST00000219476|16|+|2088271|2088316|1743|(ABE;-;@13;NG;TGG:CGG;W:R;)	ENST00000219476	1743	R	CGGAGCCGGGCAATCCACTTGG
ENST00000219548|16|+|681205|681250|79|(ABE;+;@15;NG;ACC:GCC;T:A;)	ENST00000219548	79	A	AGCAGGCCCTGGCCGACTGCCG
ENST00000219548|16|+|681205|681250|79|(ABE;+;@15;NGG;ACC:GCC;T:A;)	ENST00000219548	79	A	AGCAGGCCCTGGCCGACTGCCGG
ENST00000219548|16|+|681424|681469|123|(ABE;+;@17;NG;CTA:CTG;L:L;)	ENST00000219548	123	L	CCTGGCCAAGGAGCAGCGGCTG
ENST00000219548|16|+|681424|681469|123|(Target-AID;+;@19;NG;CTA:TTA;L:L;)	ENST00000219548	123	L	CCTGGCCAAGGAGCAGCGGCTG
ENST00000219548|16|+|681424|681469|123|(Target-AID;-;@19;NGG;TTG:TTA;L:L;)	ENST00000219548	123	L	CCAGGCTGTAAGCTGGGGAACGG
ENST00000219548|16|+|681424|681469|123|(Target-AID;-;@19;NG;TTG:TTA;L:L;)	ENST00000219548	123	L	CCAGGCTGTAAGCTGGGGAACG
ENST00000219548|16|+|681424|681469|123|(ABE;-;@13;NG;TTG:CTG;L:L;)	ENST00000219548	123	L	TTGGCCAGGCTGTAAGCTGGGG
ENST00000219548|16|+|681496|681541|147|(ABE;+;@15;NG;TAG:TGG;*:W;)	ENST00000219548	147	W	GCGCTGGAACAGCATTGAGGAG
ENST00000219548|16|+|681496|681541|147|(ABE;+;@14;NG;TGA:TGG;*:W;)	ENST00000219548	147	W	GCGCTGGAACAGCATTGAGGAG
ENST00000219548|16|+|681550|681595|165|(ABE;-;@15;NG;TTC:CTC;F:L;)	ENST00000219548	165	L	GGAGAGGTAGGAGTGCAGCTCG
ENST00000219794|16|+|31110225|31110270|156|(ABE;-;@17;NGG;TGA:CGA;*:R;)	ENST00000219794	156	R	GTCGCACCAGCTGGCAGTACTGG
ENST00000219794|16|+|31110225|31110270|156|(ABE;-;@17;NG;TGA:CGA;*:R;)	ENST00000219794	156	R	GTCGCACCAGCTGGCAGTACTG
ENST00000219794|16|+|31110448|31110493|205|(ABE;+;@14;NG;ACA:ACG;T:T;)	ENST00000219794	205	T	GGCCACGCATCACCTGGCGCTG
ENST00000220616|8|+|132882587|132882632|296|(ABE;-;@15;NG;TGA:CGA;*:R;)	ENST00000220616	296	R	ACATCGGAATCTGCCAGAGATG
ENST00000220616|8|+|132898787|132898832|1077|(Target-AID;+;@18;NG;CGC:TGC;R:C;)	ENST00000220616	1077	C	CCTGCGAGAAATCTCGAACCAG
ENST00000220616|8|+|132906764|132906809|1245|(Target-AID;+;@19;NG;CGC:TGC;R:C;)	ENST00000220616	1245	C	GTGCCAATTGCTGTGCCGCCAG
ENST00000220616|8|+|132906764|132906809|1245|(Target-AID;+;@19;NGG;CGC:TGC;R:C;)	ENST00000220616	1245	C	GTGCCAATTGCTGTGCCGCCAGG
ENST00000220616|8|+|132923375|132923420|1530|(ABE;-;@14;NGG;TGA:CGA;*:R;)	ENST00000220616	1530	R	TGGCTCGATACTGGCCATTCTGG
ENST00000220616|8|+|132923375|132923420|1530|(ABE;-;@15;NG;TGA:CGA;*:R;)	ENST00000220616	1530	R	GGCTCGATACTGGCCATTCTGG
ENST00000220616|8|+|132923375|132923420|1530|(ABE;-;@14;NG;TGA:CGA;*:R;)	ENST00000220616	1530	R	TGGCTCGATACTGGCCATTCTG
ENST00000220616|8|+|132941469|132941514|1728|(ABE;-;@17;NG;TGT:TGC;C:C;)	ENST00000220616	1728	C	GTCGCATGCAAGAAGACAGAAG
ENST00000220616|8|+|133011995|133012040|2127|(ABE;-;@15;NG;TGA:CGA;*:R;)	ENST00000220616	2127	R	GTCTCGGACAGCAGAGAAATTG
ENST00000220616|8|+|133017917|133017962|2242|(ABE;+;@13;NG;CAC:CGC;H:R;)	ENST00000220616	2242	R	GAGAGGCGCTTCCAGGCACCAG
ENST00000220616|8|+|133022098|133022143|2336|(ABE;+;@13;NG;CAA:CGA;Q:R;)	ENST00000220616	2336	R	AGCTACCGAGTGGGTGTCTTCG
ENST00000220616|8|+|133022098|133022143|2336|(ABE;+;@13;NGG;CAA:CGA;Q:R;)	ENST00000220616	2336	R	AGCTACCGAGTGGGTGTCTTCGG
ENST00000220676|8|+|54621458|54621503|172|(Target-AID;+;@18;NG;CCG:CTG;P:L;)	ENST00000220676	172	L	TCTGAGCAGGAGGGTCACCCAG
ENST00000220676|8|+|54621551|54621596|203|(ABE;+;@14;NG;AGA:GGA;R:G;)	ENST00000220676	203	G	ACGGACGGAAGGAGGGTGAGCG
ENST00000220676|8|+|54626609|54626654|917|(ABE;-;@16;NG;TAG:CAG;*:Q;)	ENST00000220676	917	Q	CTCTGTATATAATTTTGAATTG
ENST00000220822|8|+|74350530|74350575|31|(ABE;+;@14;NG;TAG:TGG;*:W;)	ENST00000220822	31	W	ACCATTGGACGCATTCCTTCAG
ENST00000220822|8|+|74350530|74350575|31|(ABE;+;@13;NG;TGA:TGG;*:W;)	ENST00000220822	31	W	ACCATTGGACGCATTCCTTCAG
ENST00000220822|8|+|74360177|74360222|125|(ABE;-;@16;NGG;TGA:CGA;*:R;)	ENST00000220822	125	R	TCTCGGTAATGTTGTACCCGTGG
ENST00000220822|8|+|74360177|74360222|125|(ABE;-;@16;NG;TGA:CGA;*:R;)	ENST00000220822	125	R	TCTCGGTAATGTTGTACCCGTG
ENST00000220822|8|+|74360201|74360246|133|(ABE;+;@16;NG;ATA:ATG;I:M;)	ENST00000220822	133	M	CAATGGATGCCTATACACATGG
ENST00000220822|8|+|74360234|74360279|144|(ABE;-;@13;NG;CTT:CCT;L:P;)	ENST00000220822	144	P	TAACTCAGGATGTAAAATGCAG
ENST00000220822|8|+|74364037|74364082|257|(ABE;-;@17;NG;TGA:CGA;*:R;)	ENST00000220822	257	R	GTCGATGCAATGTGACAGCGAG
ENST00000220822|8|+|74364037|74364082|257|(ABE;-;@15;NG;TGA:CGA;*:R;)	ENST00000220822	257	R	CAGTCGATGCAATGTGACAGCG
ENST00000220822|8|+|74364037|74364082|257|(ABE;-;@13;NG;TGA:CGA;*:R;)	ENST00000220822	257	R	TTCAGTCGATGCAATGTGACAG
ENST00000221249|19|+|7554555|7554600|792|(ABE;+;@15;NG;GAG:GGG;E:G;)	ENST00000221249	792	G	GTCAGGGTGGCTGGCCCAGCAG
ENST00000221249|19|+|7554555|7554600|792|(ABE;+;@15;NGG;GAG:GGG;E:G;)	ENST00000221249	792	G	GTCAGGGTGGCTGGCCCAGCAGG
ENST00000221249|19|+|7556479|7556524|1010|(ABE;-;@15;NGG;ATC:ACC;I:T;)	ENST00000221249	1010	T	TGGAGGTGACTGGGTACGTGAGG
ENST00000221249|19|+|7556479|7556524|1010|(ABE;-;@16;NG;ATC:ACC;I:T;)	ENST00000221249	1010	T	GGAGGTGACTGGGTACGTGAGG
ENST00000221249|19|+|7556479|7556524|1010|(ABE;-;@15;NG;ATC:ACC;I:T;)	ENST00000221249	1010	T	TGGAGGTGACTGGGTACGTGAG
ENST00000221249|19|+|7556479|7556524|1010|(ABE;-;@13;NG;ATC:ACC;I:T;)	ENST00000221249	1010	T	CATGGAGGTGACTGGGTACGTG
ENST00000221249|19|+|7556503|7556548|1018|(Target-AID;+;@17;NG;TCT:TTT;S:F;)	ENST00000221249	1018	F	CCTTTAACCGCAGCATCCATCG
ENST00000221249|19|+|7556503|7556548|1018|(Target-AID;+;@17;NGG;TCT:TTT;S:F;)	ENST00000221249	1018	F	CCTTTAACCGCAGCATCCATCGG
ENST00000221249|19|+|7556687|7556732|1051|(ABE;+;@13;NG;CAA:CGA;Q:R;)	ENST00000221249	1051	R	GCCATGCGAGTCCACAAAGATG
ENST00000221249|19|+|7556687|7556732|1051|(ABE;+;@14;NG;CAA:CGA;Q:R;)	ENST00000221249	1051	R	CCATGCGAGTCCACAAAGATGG
ENST00000221249|19|+|7556687|7556732|1051|(ABE;+;@16;NG;CAA:CGA;Q:R;)	ENST00000221249	1051	R	ATGCGAGTCCACAAAGATGGTG
ENST00000221249|19|+|7556687|7556732|1051|(ABE;+;@17;NG;CAA:CGA;Q:R;)	ENST00000221249	1051	R	TGCGAGTCCACAAAGATGGTGG
ENST00000221249|19|+|7556687|7556732|1051|(ABE;+;@13;NGG;CAA:CGA;Q:R;)	ENST00000221249	1051	R	GCCATGCGAGTCCACAAAGATGG
ENST00000221249|19|+|7556687|7556732|1051|(ABE;+;@16;NGG;CAA:CGA;Q:R;)	ENST00000221249	1051	R	ATGCGAGTCCACAAAGATGGTGG
ENST00000221249|19|+|7556687|7556732|1051|(ABE;+;@17;NGG;CAA:CGA;Q:R;)	ENST00000221249	1051	R	TGCGAGTCCACAAAGATGGTGGG
ENST00000221249|19|+|7557163|7557208|1062|(ABE;+;@13;NG;ATG:GTG;M:V;)	ENST00000221249	1062	V	GCGGTACGTGCGCGCCAGCATG
ENST00000221249|19|+|7557220|7557265|1081|(ABE;+;@13;NG;AGG:GGG;R:G;)	ENST00000221249	1081	G	CAAGGACGGGCACCTACTCATG
ENST00000221249|19|+|7557220|7557265|1081|(ABE;+;@14;NG;AGG:GGG;R:G;)	ENST00000221249	1081	G	AAGGACGGGCACCTACTCATGG
ENST00000221249|19|+|7557220|7557265|1081|(ABE;+;@17;NG;AGG:GGG;R:G;)	ENST00000221249	1081	G	GACGGGCACCTACTCATGGATG
ENST00000221249|19|+|7557220|7557265|1081|(ABE;+;@13;NGG;AGG:GGG;R:G;)	ENST00000221249	1081	G	CAAGGACGGGCACCTACTCATGG
ENST00000221249|19|+|7557220|7557265|1081|(ABE;+;@17;NGG;AGG:GGG;R:G;)	ENST00000221249	1081	G	GACGGGCACCTACTCATGGATGG
ENST00000221283|19|+|7643149|7643194|345|(ABE;-;@16;NG;ATG:ACG;M:T;)	ENST00000221283	345	T	GTGCGTAGAATACTGCAGGGTG
ENST00000221452|19|+|45032709|45032754|397|(ABE;-;@16;NG;TAT:TAC;Y:Y;)	ENST00000221452	397	Y	GCAGGTACGTGAAAGGCAATGG
ENST00000221486|19|+|12806760|12806805|37|(ABE;+;@16;NG;AGC:GGC;S:G;)	ENST00000221486	37	G	GGCGGGCAGGGGCCCCGTGCTG
ENST00000221486|19|+|12806760|12806805|37|(ABE;+;@17;NG;AGC:GGC;S:G;)	ENST00000221486	37	G	GCGGGCAGGGGCCCCGTGCTGG
ENST00000221486|19|+|12806760|12806805|37|(ABE;+;@16;NGG;AGC:GGC;S:G;)	ENST00000221486	37	G	GGCGGGCAGGGGCCCCGTGCTGG
ENST00000221486|19|+|12806760|12806805|37|(ABE;+;@17;NGG;AGC:GGC;S:G;)	ENST00000221486	37	G	GCGGGCAGGGGCCCCGTGCTGGG
ENST00000221496|19|+|2250645|2250690|191|(ABE;-;@17;NG;TGA:CGA;*:R;)	ENST00000221496	191	R	CTCGGGAGGGGCAGAGGCTCTG
ENST00000221496|19|+|2251225|2251270|325|(Target-AID;-;@19;NG;CGG:CAG;R:Q;)	ENST00000221496	325	Q	CTGCGGGAAGCCGGCCAGCGCG
ENST00000221975|19|+|41869699|41869744|53|(ABE;+;@13;NG;GAA:GGA;E:G;)	ENST00000221975	53	G	CCTCAGGGACAAAGAGATCTGG
ENST00000221975|19|+|41869726|41869771|62|(ABE;+;@16;NG;AGA:GGA;R:G;)	ENST00000221975	62	G	CGCCGGACAGGTAAGGCCTGCG
ENST00000221996|19|+|47839319|47839364|92|(ABE;+;@13;NG;ACT:GCT;T:A;)	ENST00000221996	92	A	CCGGAGGGCTAAATGCAGGCAG
ENST00000221996|19|+|47839319|47839364|92|(ABE;+;@16;NG;ACT:GCT;T:A;)	ENST00000221996	92	A	GAGGGCTAAATGCAGGCAGCAG
ENST00000222214|19|+|12891907|12891952|76|(ABE;-;@16;NG;TAG:CAG;*:Q;)	ENST00000222214	76	Q	TCCTGGCAGTAGGTGCGGAAGG
ENST00000222214|19|+|12891943|12891988|88|(ABE;-;@17;NG;TGC:CGC;C:R;)	ENST00000222214	88	R	TGCGATTGGCCAACAGGATGCG
ENST00000222214|19|+|12891943|12891988|88|(ABE;-;@15;NG;TGC:CGC;C:R;)	ENST00000222214	88	R	GTTGCGATTGGCCAACAGGATG
ENST00000222214|19|+|12892102|12892147|94|(ABE;+;@13;NG;CAG:CGG;Q:R;)	ENST00000222214	94	R	TTTCATCGGGAGATCATTTCGG
ENST00000222214|19|+|12893508|12893553|128|(ABE;+;@15;NG;CAA:CGA;Q:R;)	ENST00000222214	128	R	GGCCCGAGAGCTGGAGCGGGTG
ENST00000222214|19|+|12893508|12893553|128|(ABE;+;@15;NGG;CAA:CGA;Q:R;)	ENST00000222214	128	R	GGCCCGAGAGCTGGAGCGGGTGG
ENST00000222214|19|+|12896310|12896355|255|(ABE;-;@13;NG;TTG:TCG;L:S;)	ENST00000222214	255	S	CCGCAGCGAGAACTTGCCCTGG
ENST00000222214|19|+|12896316|12896361|257|(ABE;-;@17;NGG;TGG:CGG;W:R;)	ENST00000222214	257	R	CCCGCAGCGAGAACTTGCCCTGG
ENST00000222214|19|+|12896316|12896361|257|(ABE;-;@17;NG;TGG:CGG;W:R;)	ENST00000222214	257	R	CCCGCAGCGAGAACTTGCCCTG
ENST00000222214|19|+|12896891|12896936|286|(ABE;-;@15;NG;TCC:CCC;S:P;)	ENST00000222214	286	P	GAAGGGACCCTGTAGGGTTGAG
ENST00000222214|19|+|12896915|12896960|294|(ABE;+;@16;NG;CAG:CGG;Q:R;)	ENST00000222214	294	R	GCCCGGTACGGCATCGCGTGGG
ENST00000222214|19|+|12896915|12896960|294|(ABE;+;@17;NG;CAG:CGG;Q:R;)	ENST00000222214	294	R	CCCGGTACGGCATCGCGTGGGG
ENST00000222214|19|+|12896915|12896960|294|(ABE;+;@16;NGG;CAG:CGG;Q:R;)	ENST00000222214	294	R	GCCCGGTACGGCATCGCGTGGGG
ENST00000222214|19|+|12896918|12896963|295|(Target-AID;+;@19;NG;CAC:TAC;H:Y;)	ENST00000222214	295	Y	GTACGGCATCGCGTGGGGCGTG
ENST00000222214|19|+|12896927|12896972|298|(ABE;+;@14;NG;ACG:GCG;T:A;)	ENST00000222214	298	A	GGCATCGCGTGGGGCGTGCTTG
ENST00000222214|19|+|12896927|12896972|298|(ABE;+;@14;NGG;ACG:GCG;T:A;)	ENST00000222214	298	A	GGCATCGCGTGGGGCGTGCTTGG
ENST00000222214|19|+|12897742|12897787|382|(ABE;+;@14;NG;ACC:GCC;T:A;)	ENST00000222214	382	A	GACATCGCCCGCCAGGCCCGAG
ENST00000222214|19|+|12897763|12897808|389|(ABE;-;@17;NGG;TTG:CTG;L:L;)	ENST00000222214	389	L	CCAGCATGTCTCGGGCCTGGCGG
ENST00000222214|19|+|12897763|12897808|389|(Target-AID;-;@19;NGG;TTG:TTA;L:L;)	ENST00000222214	389	L	CCAGCATGTCTCGGGCCTGGCGG
ENST00000222214|19|+|12897763|12897808|389|(ABE;-;@14;NGG;TTG:CTG;L:L;)	ENST00000222214	389	L	CCCCCAGCATGTCTCGGGCCTGG
ENST00000222214|19|+|12897763|12897808|389|(ABE;-;@17;NG;TTG:CTG;L:L;)	ENST00000222214	389	L	CCAGCATGTCTCGGGCCTGGCG
ENST00000222214|19|+|12897763|12897808|389|(Target-AID;-;@19;NG;TTG:TTA;L:L;)	ENST00000222214	389	L	CCAGCATGTCTCGGGCCTGGCG
ENST00000222214|19|+|12897763|12897808|389|(ABE;-;@14;NG;TTG:CTG;L:L;)	ENST00000222214	389	L	CCCCCAGCATGTCTCGGGCCTG
ENST00000222214|19|+|12897796|12897841|400|(ABE;+;@16;NG;ATG:GTG;M:V;)	ENST00000222214	400	V	TCACGTGATCCGGCACGCCATG
ENST00000222214|19|+|12897802|12897847|402|(ABE;-;@15;NG;TGG:CGG;W:R;)	ENST00000222214	402	R	GTGCCGGATCACGTGATACTCG
ENST00000222214|19|+|12897802|12897847|402|(ABE;+;@16;NG;CAG:CGG;Q:R;)	ENST00000222214	402	R	ATCCGGCACGCCATGAACCTGG
ENST00000222214|19|+|12897811|12897856|405|(Target-AID;-;@17;NG;GTG:ATG;V:M;)	ENST00000222214	405	M	TCATGGCGTGCCGGATCACGTG
ENST00000222214|19|+|12897838|12897883|414|(ABE;+;@13;NG;AAA:GAA;K:E;)	ENST00000222214	414	E	CACCTACGAAGGTAGGAGCTGG
ENST00000222214|19|+|12899463|12899508|421|(ABE;-;@14;NG;GTC:GCC;V:A;)	ENST00000222214	421	A	ATCAGGGCGTGAATGTCATGTG
ENST00000222248|19|+|17872574|17872619|93|(ABE;+;@17;NG;AGC:GGC;S:G;)	ENST00000222248	93	G	CTGGGCCAGCTTCTGAACTCGG
ENST00000222248|19|+|17882138|17882183|395|(ABE;+;@17;NG;AGA:GGA;R:G;)	ENST00000222248	395	G	TACGGATCGGCCTGTCTCACCG
ENST00000222248|19|+|17888373|17888418|531|(ABE;-;@14;NG;TAT:TAC;Y:Y;)	ENST00000222248	531	Y	GGCACCGTAATAGAGATAGGAG
ENST00000222248|19|+|17888409|17888454|543|(ABE;+;@14;NG;GAA:GGA;E:G;)	ENST00000222248	543	G	TGTGCGGAGCCCTCATCAGCTG
ENST00000222254|19|+|18162952|18162997|373|(ABE;+;@13;NG;AGG:GGG;R:G;)	ENST00000222254	373	G	GAAAGGCGGGAACAATAAGCTG
ENST00000222254|19|+|18163036|18163081|401|(Target-AID;+;@19;NG;CCC:CTC;P:L;)	ENST00000222254	401	L	CTCATCAATCACTACCGCCACG
ENST00000222304|19|+|35284979|35285024|72|(ABE;-;@17;NG;TGT:TGC;C:C;)	ENST00000222304	72	C	ACAGCAGCCGCAGCAGAAAATG
ENST00000222725|7|+|2525277|2525322|188|(Target-AID;+;@19;NG;CTC:TTC;L:F;)	ENST00000222725	188	F	CTTCATCGAGTCCGGCAGGAAG
ENST00000223215|7|+|130499876|130499921|187|(ABE;-;@13;NGG;TCA:CCA;S:P;)	ENST00000223215	187	P	AGGAGTGGACGGTGAGTCTCAGG
ENST00000223215|7|+|130499876|130499921|187|(ABE;-;@14;NG;TCA:CCA;S:P;)	ENST00000223215	187	P	GGAGTGGACGGTGAGTCTCAGG
ENST00000223215|7|+|130499876|130499921|187|(ABE;-;@13;NG;TCA:CCA;S:P;)	ENST00000223215	187	P	AGGAGTGGACGGTGAGTCTCAG
ENST00000223528|9|+|105601303|105601348|116|(ABE;-;@13;NG;TAG:CAG;*:Q;)	ENST00000223528	116	Q	TGATACTGCAGTGCAAATGCAG
ENST00000223528|9|+|105604430|105604475|203|(ABE;+;@14;NG;CAA:CGA;Q:R;)	ENST00000223528	203	R	CCTTCCGAAAGTTACAGTTTGG
ENST00000223528|9|+|105607828|105607873|227|(Target-AID;+;@19;NG;CTA:TTA;L:L;)	ENST00000223528	227	L	ACTGGAAGTTCTCATTCCAAAG
ENST00000223528|9|+|105607828|105607873|227|(Target-AID;+;@19;NGG;CTA:TTA;L:L;)	ENST00000223528	227	L	ACTGGAAGTTCTCATTCCAAAGG
ENST00000223528|9|+|105607828|105607873|227|(ABE;-;@17;NG;TTG:CTG;L:L;)	ENST00000223528	227	L	CCAGTCCATCAACAGTAACTTG
ENST00000223528|9|+|105607828|105607873|227|(Target-AID;-;@19;NG;TTG:TTA;L:L;)	ENST00000223528	227	L	CCAGTCCATCAACAGTAACTTG
ENST00000223528|9|+|105617945|105617990|307|(ABE;-;@15;NG;TGA:CGA;*:R;)	ENST00000223528	307	R	TTGTCGATACCATCCTAAAAAG
ENST00000223528|9|+|105635153|105635198|433|(Target-AID;-;@18;NGG;GCG:ACG;A:T;)	ENST00000223528	433	T	CGTCTTTACAGGAATCTTCCAGG
ENST00000223528|9|+|105635153|105635198|433|(Target-AID;-;@19;NG;GCG:ACG;A:T;)	ENST00000223528	433	T	GTCTTTACAGGAATCTTCCAGG
ENST00000223528|9|+|105635153|105635198|433|(Target-AID;-;@18;NG;GCG:ACG;A:T;)	ENST00000223528	433	T	CGTCTTTACAGGAATCTTCCAG
ENST00000224237|10|+|17229851|17229896|151|(ABE;+;@13;NG;AAG:GAG;K:E;)	ENST00000224237	151	E	CCTCTACGAGGAGGAGATGCGG
ENST00000224237|10|+|17229851|17229896|151|(ABE;+;@16;NG;AAG:GAG;K:E;)	ENST00000224237	151	E	CTACGAGGAGGAGATGCGGGAG
ENST00000224237|10|+|17229851|17229896|151|(ABE;+;@13;NGG;AAG:GAG;K:E;)	ENST00000224237	151	E	CCTCTACGAGGAGGAGATGCGGG
ENST00000224721|10|+|71566768|71566813|160|(ABE;+;@14;NG;AAC:GAC;N:D;)	ENST00000224721	160	D	GACCCCGACTTGGGGGCAGGGG
ENST00000224721|10|+|71566768|71566813|160|(ABE;+;@15;NG;AAC:GAC;N:D;)	ENST00000224721	160	D	ACCCCGACTTGGGGGCAGGGGG
ENST00000224721|10|+|71566768|71566813|160|(ABE;+;@14;NGG;AAC:GAC;N:D;)	ENST00000224721	160	D	GACCCCGACTTGGGGGCAGGGGG
ENST00000224721|10|+|71570861|71570906|240|(ABE;-;@17;NGG;CTT:CCT;L:P;)	ENST00000224721	240	P	TAAGGCAGGTTGATGAAGATGGG
ENST00000224721|10|+|71570861|71570906|240|(ABE;-;@17;NG;CTT:CCT;L:P;)	ENST00000224721	240	P	TAAGGCAGGTTGATGAAGATGG
ENST00000224721|10|+|71615550|71615595|301|(ABE;+;@17;NG;CAG:CGG;Q:R;)	ENST00000224721	301	R	ACCGGGAGAACCCCCTGTACAG
ENST00000224721|10|+|71645851|71645896|395|(ABE;-;@17;NG;TCT:TCC;S:S;)	ENST00000224721	395	S	GTGGGAGTTGTTCCCCACCAAG
ENST00000224721|10|+|71646452|71646497|436|(ABE;+;@15;NG;AAT:AGT;N:S;)	ENST00000224721	436	S	TGAGAGTGTGCCTGACCATGTG
ENST00000224721|10|+|71646452|71646497|436|(ABE;+;@16;NG;AAT:AGT;N:S;)	ENST00000224721	436	S	GAGAGTGTGCCTGACCATGTGG
ENST00000224721|10|+|71646452|71646497|436|(ABE;+;@15;NGG;AAT:AGT;N:S;)	ENST00000224721	436	S	TGAGAGTGTGCCTGACCATGTGG
ENST00000224721|10|+|71646452|71646497|436|(ABE;+;@16;NGG;AAT:AGT;N:S;)	ENST00000224721	436	S	GAGAGTGTGCCTGACCATGTGGG
ENST00000224721|10|+|71646569|71646614|475|(ABE;+;@13;NG;ATG:GTG;M:V;)	ENST00000224721	475	V	CGTCACCGTGGGGACCTCTGTG
ENST00000224721|10|+|71677513|71677558|532|(ABE;-;@16;NG;ATG:ACG;M:T;)	ENST00000224721	532	T	GATCGTCAGGGTGAAGCGCTGG
ENST00000224721|10|+|71702640|71702685|901|(ABE;+;@14;NG;AAA:GAA;K:E;)	ENST00000224721	901	E	GTGCTTGAAGGCATCCCGGCGG
ENST00000224721|10|+|71702640|71702685|901|(ABE;+;@14;NGG;AAA:GAA;K:E;)	ENST00000224721	901	E	GTGCTTGAAGGCATCCCGGCGGG
ENST00000224721|10|+|71704985|71705030|944|(Target-AID;-;@18;NG;GGC:AGC;G:S;)	ENST00000224721	944	S	GCTGCTGCTGTTGATGAGGAAG
ENST00000224721|10|+|71705093|71705138|980|(ABE;+;@13;NG;ACA:ACG;T:T;)	ENST00000224721	980	T	CCAGCACGCTCACCATCCATGG
ENST00000224721|10|+|71705093|71705138|980|(ABE;+;@15;NG;ACA:ACG;T:T;)	ENST00000224721	980	T	AGCACGCTCACCATCCATGGTG
ENST00000224721|10|+|71705093|71705138|980|(ABE;+;@17;NG;ACA:ACG;T:T;)	ENST00000224721	980	T	CACGCTCACCATCCATGGTGAG
ENST00000224721|10|+|71705093|71705138|980|(ABE;+;@17;NGG;ACA:ACG;T:T;)	ENST00000224721	980	T	CACGCTCACCATCCATGGTGAGG
ENST00000224721|10|+|71712669|71712714|1083|(ABE;+;@14;NG;ACA:ACG;T:T;)	ENST00000224721	1083	T	ACACACGGGCACAGCCACCGTG
ENST00000224721|10|+|71725400|71725445|1161|(ABE;-;@15;NG;TGA:CGA;*:R;)	ENST00000224721	1161	R	CCCTCGCATCAGGAGCCCATTG
ENST00000224721|10|+|71732048|71732093|1267|(ABE;-;@17;NG;ACT:ACC;T:T;)	ENST00000224721	1267	T	CACGGTGATGATAAGCCCTGTG
ENST00000224721|10|+|71732048|71732093|1267|(ABE;-;@15;NG;ACT:ACC;T:T;)	ENST00000224721	1267	T	TTCACGGTGATGATAAGCCCTG
ENST00000224721|10|+|71732093|71732138|1282|(Target-AID;-;@19;NGG;AGT:AAT;S:N;)	ENST00000224721	1282	N	ATTCATCATGTAGCTGGTCTTGG
ENST00000224721|10|+|71732093|71732138|1282|(Target-AID;-;@19;NG;AGT:AAT;S:N;)	ENST00000224721	1282	N	ATTCATCATGTAGCTGGTCTTG
ENST00000224721|10|+|71741672|71741717|1540|(ABE;-;@13;NG;AAT:AAC;N:N;)	ENST00000224721	1540	N	CACCCACGTTCTGGGAGGAGAG
ENST00000224721|10|+|71777862|71777907|1684|(ABE;-;@15;NG;TGC:CGC;C:R;)	ENST00000224721	1684	R	GATGCGGAAGGTGTTGACGATG
ENST00000224721|10|+|71778227|71778272|1710|(ABE;-;@13;NGG;ATT:ATC;I:I;)	ENST00000224721	1710	I	CAGTGACGATCAGGGTGTAGCGG
ENST00000224721|10|+|71778227|71778272|1710|(ABE;-;@13;NG;ATT:ATC;I:I;)	ENST00000224721	1710	I	CAGTGACGATCAGGGTGTAGCG
ENST00000224721|10|+|71778230|71778275|1711|(ABE;+;@16;NG;ATC:GTC;I:V;)	ENST00000224721	1711	V	GATCGTCACTGCCACAGACCAG
ENST00000224721|10|+|71784908|71784953|1848|(ABE;-;@14;NG;GAT:GAC;D:D;)	ENST00000224721	1848	D	CACAGGGTCGTTGTCGTTGATG
ENST00000224721|10|+|71785076|71785121|1904|(ABE;+;@14;NG;ACA:ACG;T:T;)	ENST00000224721	1904	T	TGCCACGGTAGGGCCTAGACTG
ENST00000224721|10|+|71785648|71785693|1918|(ABE;+;@15;NG;CAG:CGG;Q:R;)	ENST00000224721	1918	R	CGAGCGGATCCCAGAGTACAAG
ENST00000224721|10|+|71793330|71793375|2142|(ABE;-;@14;NG;TTA:CTA;L:L;)	ENST00000224721	2142	L	CCGTTAGCCTGTAGGACTCCTG
ENST00000224721|10|+|71793330|71793375|2142|(Target-AID;+;@17;NG;CTG:TTG;L:L;)	ENST00000224721	2142	L	AGGCTAACGGTGGTGGCCACCG
ENST00000224721|10|+|71793393|71793438|2163|(ABE;+;@15;NG;CTA:CTG;L:L;)	ENST00000224721	2163	L	ATTCTGATCGATGACATCAATG
ENST00000224721|10|+|71793393|71793438|2163|(Target-AID;+;@17;NG;CTA:TTA;L:L;)	ENST00000224721	2163	L	ATTCTGATCGATGACATCAATG
ENST00000224721|10|+|71793393|71793438|2163|(Target-AID;-;@18;NG;TTG:TTA;L:L;)	ENST00000224721	2163	L	ATCAGAATGGTGACAATGGCTG
ENST00000224721|10|+|71793510|71793555|2202|(ABE;+;@13;NG;AAC:GAC;N:D;)	ENST00000224721	2202	D	TGACCACGACCTCAACCCAAAG
ENST00000224721|10|+|71793510|71793555|2202|(ABE;+;@17;NG;AAC:GAC;N:D;)	ENST00000224721	2202	D	CACGACCTCAACCCAAAGCTAG
ENST00000224721|10|+|71793591|71793636|2229|(ABE;-;@13;NG;GAT:GAC;D:D;)	ENST00000224721	2229	D	CAAAGGCGTCCTCCTGGTTGGG
ENST00000224721|10|+|71798418|71798463|2306|(ABE;+;@15;NG;CTA:CTG;L:L;)	ENST00000224721	2306	L	ATCCTGGAGGGGGCCACCCCTG
ENST00000224721|10|+|71798418|71798463|2306|(ABE;+;@16;NG;CTA:CTG;L:L;)	ENST00000224721	2306	L	TCCTGGAGGGGGCCACCCCTGG
ENST00000224721|10|+|71798418|71798463|2306|(ABE;+;@17;NG;CTA:CTG;L:L;)	ENST00000224721	2306	L	CCTGGAGGGGGCCACCCCTGGG
ENST00000224721|10|+|71798418|71798463|2306|(Target-AID;+;@19;NG;CTA:TTA;L:L;)	ENST00000224721	2306	L	CCTGGAGGGGGCCACCCCTGGG
ENST00000224721|10|+|71798418|71798463|2306|(ABE;+;@15;NGG;CTA:CTG;L:L;)	ENST00000224721	2306	L	ATCCTGGAGGGGGCCACCCCTGG
ENST00000224721|10|+|71798418|71798463|2306|(ABE;+;@16;NGG;CTA:CTG;L:L;)	ENST00000224721	2306	L	TCCTGGAGGGGGCCACCCCTGGG
ENST00000224721|10|+|71799605|71799650|2454|(ABE;+;@13;NG;ACA:ACG;T:T;)	ENST00000224721	2454	T	CCACCACGGTGAGCAGTGATGG
ENST00000224721|10|+|71799605|71799650|2454|(ABE;+;@15;NG;ACA:ACG;T:T;)	ENST00000224721	2454	T	ACCACGGTGAGCAGTGATGGAG
ENST00000224721|10|+|71799605|71799650|2454|(ABE;+;@17;NG;ACA:ACG;T:T;)	ENST00000224721	2454	T	CACGGTGAGCAGTGATGGAGGG
ENST00000224721|10|+|71799605|71799650|2454|(ABE;+;@15;NGG;ACA:ACG;T:T;)	ENST00000224721	2454	T	ACCACGGTGAGCAGTGATGGAGG
ENST00000224721|10|+|71803300|71803345|2592|(ABE;+;@17;NG;TGA:TGG;*:W;)	ENST00000224721	2592	W	CTGGGGCACCACCATGCTCCTG
ENST00000224721|10|+|71803300|71803345|2592|(ABE;+;@17;NGG;TGA:TGG;*:W;)	ENST00000224721	2592	W	CTGGGGCACCACCATGCTCCTGG
ENST00000224721|10|+|71806164|71806209|2695|(ABE;+;@16;NG;AAC:GAC;N:D;)	ENST00000224721	2695	D	CAGCGACCTGGGCCAGCCAGTG
ENST00000224721|10|+|71811342|71811387|3043|(ABE;+;@14;NG;CGA:CGG;R:R;)	ENST00000224721	3043	R	TTTCCGGAACTACAACGTCCTG
ENST00000224721|10|+|71811342|71811387|3043|(ABE;+;@14;NGG;CGA:CGG;R:R;)	ENST00000224721	3043	R	TTTCCGGAACTACAACGTCCTGG
ENST00000224721|10|+|71812576|71812621|3167|(ABE;+;@13;NG;ACA:ACG;T:T;)	ENST00000224721	3167	T	GCCCCACGCGCACCCATGTGAG
ENST00000224721|10|+|71812576|71812621|3167|(ABE;+;@17;NG;ACA:ACG;T:T;)	ENST00000224721	3167	T	CACGCGCACCCATGTGAGCCAG
ENST00000224721|10|+|71813258|71813303|3224|(ABE;-;@15;NG;TGG:CGG;W:R;)	ENST00000224721	3224	R	GAGCCGCAGGTAATCCTCCAGG
ENST00000224721|10|+|71815077|71815122|3296|(ABE;+;@13;NG;AAC:GAC;N:D;)	ENST00000224721	3296	D	GGCCACCGACCTCAACAGCCTG
ENST00000224721|10|+|71815077|71815122|3296|(ABE;+;@17;NG;AAC:GAC;N:D;)	ENST00000224721	3296	D	ACCGACCTCAACAGCCTGCCCG
ENST00000224721|10|+|71815092|71815137|3301|(ABE;-;@17;NGG;CCT:CCC;P:P;)	ENST00000224721	3301	P	CTCGGGCAGGCTGTTGAGGTCGG
ENST00000224721|10|+|71815092|71815137|3301|(ABE;-;@17;NG;CCT:CCC;P:P;)	ENST00000224721	3301	P	CTCGGGCAGGCTGTTGAGGTCG
ENST00000224721|10|+|71815215|71815260|3342|(ABE;-;@13;NG;GAT:GAC;D:D;)	ENST00000224721	3342	D	TGATCACGTCGCGAAGTTTGTG
ENST00000225567|17|+|46923177|46923222|3|(ABE;-;@13;NG;TCC:CCC;S:P;)	ENST00000225567	3	P	AACAGGGGATCCATGTCGCCGG
ENST00000225573|17|+|47941654|47941699|1|(Target-AID;+;@17;NG;ACG:ATG;T:M;)	ENST00000225573	1	M	CCATGACGTGCTGGCTGCGGGG
ENST00000225573|17|+|47941654|47941699|1|(ABE;+;@13;NG;ATA:ATG;I:M;)	ENST00000225573	1	M	CCCCCATGACGTGCTGGCTGCG
ENST00000225573|17|+|47941654|47941699|1|(ABE;+;@16;NG;ATA:ATG;I:M;)	ENST00000225573	1	M	CCATGACGTGCTGGCTGCGGGG
ENST00000225573|17|+|47941654|47941699|1|(ABE;+;@13;NGG;ATA:ATG;I:M;)	ENST00000225573	1	M	CCCCCATGACGTGCTGGCTGCGG
ENST00000225573|17|+|47945570|47945615|133|(ABE;+;@14;NG;TAG:TGG;*:W;)	ENST00000225573	133	W	TCTACTGGGAGCCACTTAACCG
ENST00000225573|17|+|47945570|47945615|133|(ABE;+;@13;NG;TGA:TGG;*:W;)	ENST00000225573	133	W	TCTACTGGGAGCCACTTAACCG
ENST00000225573|17|+|47945570|47945615|133|(ABE;+;@17;NG;TGA:TGG;*:W;)	ENST00000225573	133	W	CTGGGAGCCACTTAACCGTCAG
ENST00000225573|17|+|47945570|47945615|133|(ABE;+;@17;NGG;TGA:TGG;*:W;)	ENST00000225573	133	W	CTGGGAGCCACTTAACCGTCAGG
ENST00000225573|17|+|47946304|47946349|141|(ABE;+;@14;NG;CTA:CTG;L:L;)	ENST00000225573	141	L	GTATCTGAGAAAGAAAAATGAG
ENST00000225573|17|+|47946304|47946349|141|(ABE;+;@15;NG;CTA:CTG;L:L;)	ENST00000225573	141	L	TATCTGAGAAAGAAAAATGAGG
ENST00000225573|17|+|47946304|47946349|141|(Target-AID;+;@17;NG;CTA:TTA;L:L;)	ENST00000225573	141	L	TATCTGAGAAAGAAAAATGAGG
ENST00000225573|17|+|47946304|47946349|141|(ABE;+;@14;NGG;CTA:CTG;L:L;)	ENST00000225573	141	L	GTATCTGAGAAAGAAAAATGAGG
ENST00000225573|17|+|47946304|47946349|141|(ABE;-;@13;NGG;TTG:CTG;L:L;)	ENST00000225573	141	L	TTTCTCAGATACTGTCCAGGGGG
ENST00000225573|17|+|47946304|47946349|141|(Target-AID;-;@19;NG;TTG:TTA;L:L;)	ENST00000225573	141	L	TCAGATACTGTCCAGGGGGAAG
ENST00000225573|17|+|47946304|47946349|141|(ABE;-;@13;NG;TTG:CTG;L:L;)	ENST00000225573	141	L	TTTCTCAGATACTGTCCAGGGG
ENST00000225573|17|+|47946659|47946704|186|(ABE;+;@14;NG;CAG:CGG;Q:R;)	ENST00000225573	186	R	ATGACCGGATAGTCTTTCGGCG
ENST00000225573|17|+|47946659|47946704|186|(ABE;+;@15;NG;CAG:CGG;Q:R;)	ENST00000225573	186	R	TGACCGGATAGTCTTTCGGCGG
ENST00000225573|17|+|47946659|47946704|186|(ABE;+;@16;NG;CAG:CGG;Q:R;)	ENST00000225573	186	R	GACCGGATAGTCTTTCGGCGGG
ENST00000225573|17|+|47946659|47946704|186|(ABE;+;@14;NGG;CAG:CGG;Q:R;)	ENST00000225573	186	R	ATGACCGGATAGTCTTTCGGCGG
ENST00000225573|17|+|47946659|47946704|186|(ABE;+;@15;NGG;CAG:CGG;Q:R;)	ENST00000225573	186	R	TGACCGGATAGTCTTTCGGCGGG
ENST00000225573|17|+|47946659|47946704|186|(ABE;+;@16;NGG;CAG:CGG;Q:R;)	ENST00000225573	186	R	GACCGGATAGTCTTTCGGCGGGG
ENST00000225573|17|+|47946758|47946803|219|(Target-AID;+;@17;NG;CAA:TAA;Q:*;)	ENST00000225573	219	*	CCTTAACTCTGGGACCTGCTGG
ENST00000225927|17|+|42536392|42536437|48|(Target-AID;+;@18;NG;CTC:TTC;L:F;)	ENST00000225927	48	F	ACTTCTCCGTGTCGGTGGAGCG
ENST00000225927|17|+|42538669|42538714|234|(ABE;-;@17;NGG;TGC:CGC;C:R;)	ENST00000225927	234	R	AGCGCATCTGGTCCAGGACCCGG
ENST00000225927|17|+|42538669|42538714|234|(ABE;-;@17;NG;TGC:CGC;C:R;)	ENST00000225927	234	R	AGCGCATCTGGTCCAGGACCCG
ENST00000225927|17|+|42541052|42541097|297|(ABE;-;@15;NG;TGA:CGA;*:R;)	ENST00000225927	297	R	CTCTCGCAGGAAGAGGCTCCCG
ENST00000225927|17|+|42543545|42543590|521|(ABE;-;@15;NGG;CTG:CCG;L:P;)	ENST00000225927	521	P	GGGACGGCCGCCTGACCAGCGGG
ENST00000225927|17|+|42543545|42543590|521|(ABE;-;@14;NGG;CTG:CCG;L:P;)	ENST00000225927	521	P	AGGGACGGCCGCCTGACCAGCGG
ENST00000225927|17|+|42543545|42543590|521|(ABE;-;@15;NG;CTG:CCG;L:P;)	ENST00000225927	521	P	GGGACGGCCGCCTGACCAGCGG
ENST00000225927|17|+|42543545|42543590|521|(ABE;-;@14;NG;CTG:CCG;L:P;)	ENST00000225927	521	P	AGGGACGGCCGCCTGACCAGCG
ENST00000225927|17|+|42543677|42543722|565|(ABE;-;@14;NGG;TGG:CGG;W:R;)	ENST00000225927	565	R	CCTGCCGAGTGAGGTCCAGCAGG
ENST00000225927|17|+|42543677|42543722|565|(ABE;-;@15;NG;TGG:CGG;W:R;)	ENST00000225927	565	R	CTGCCGAGTGAGGTCCAGCAGG
ENST00000225927|17|+|42543677|42543722|565|(ABE;-;@14;NG;TGG:CGG;W:R;)	ENST00000225927	565	R	CCTGCCGAGTGAGGTCCAGCAG
ENST00000225927|17|+|42543677|42543722|565|(ABE;+;@13;NG;CAG:CGG;Q:R;)	ENST00000225927	565	R	CTCACTCGGCAGGCAGTGCAGG
ENST00000225927|17|+|42543911|42543956|643|(ABE;+;@17;NG;CAC:CGC;H:R;)	ENST00000225927	643	R	GCCGCTACCAGCTGACCTTGTG
ENST00000225927|17|+|42543911|42543956|643|(ABE;+;@17;NGG;CAC:CGC;H:R;)	ENST00000225927	643	R	GCCGCTACCAGCTGACCTTGTGG
ENST00000226247|17|+|28524502|28524547|49|(ABE;-;@13;NGG;TTG:TCG;L:S;)	ENST00000226247	49	S	AAATGACGAGCAGCTGAAGCCGG
ENST00000226247|17|+|28524502|28524547|49|(ABE;-;@13;NG;TTG:TCG;L:S;)	ENST00000226247	49	S	AAATGACGAGCAGCTGAAGCCG
ENST00000226247|17|+|28534837|28534882|430|(ABE;-;@17;NG;TCA:CCA;S:P;)	ENST00000226247	430	P	CTGGAGCTGGGTGGAGTGAGTG
ENST00000226247|17|+|28534837|28534882|430|(ABE;-;@15;NG;TCA:CCA;S:P;)	ENST00000226247	430	P	GCCTGGAGCTGGGTGGAGTGAG
ENST00000226760|4|+|6277440|6277485|3|(ABE;-;@15;NGG;TCT:TCC;S:S;)	ENST00000226760	3	S	GTGTTGGAGTCCATCCTGCCTGG
ENST00000226760|4|+|6277440|6277485|3|(ABE;-;@16;NG;TCT:TCC;S:S;)	ENST00000226760	3	S	TGTTGGAGTCCATCCTGCCTGG
ENST00000226760|4|+|6277440|6277485|3|(ABE;-;@15;NG;TCT:TCC;S:S;)	ENST00000226760	3	S	GTGTTGGAGTCCATCCTGCCTG
ENST00000226760|4|+|6277473|6277518|14|(Target-AID;-;@18;NG;CGG:CAG;R:Q;)	ENST00000226760	14	Q	GCTGTGGGCAGGAGGGGCCCAG
ENST00000226760|4|+|6277575|6277620|48|(ABE;-;@14;NG;GTT:GCT;V:A;)	ENST00000226760	48	A	GGGCCAGCCTGGGGTCCGGGTG
ENST00000226760|4|+|6289025|6289070|126|(ABE;+;@13;NG;ACT:GCT;T:A;)	ENST00000226760	126	A	CTGCACCGCTGTGGACTGGCTG
ENST00000226760|4|+|6289025|6289070|126|(ABE;+;@14;NG;ACT:GCT;T:A;)	ENST00000226760	126	A	TGCACCGCTGTGGACTGGCTGG
ENST00000226760|4|+|6289025|6289070|126|(ABE;+;@13;NGG;ACT:GCT;T:A;)	ENST00000226760	126	A	CTGCACCGCTGTGGACTGGCTGG
ENST00000226760|4|+|6291945|6291990|228|(ABE;-;@13;NG;CGT:CGC;R:R;)	ENST00000226760	228	R	CCAGCATGCGCCTCTGCTTCTG
ENST00000226760|4|+|6300644|6300689|291|(ABE;-;@16;NGG;TAT:TAC;Y:Y;)	ENST00000226760	291	Y	GGGGGTACTTGACCACCTGGGGG
ENST00000226760|4|+|6300644|6300689|291|(ABE;-;@15;NGG;TAT:TAC;Y:Y;)	ENST00000226760	291	Y	AGGGGGTACTTGACCACCTGGGG
ENST00000226760|4|+|6300644|6300689|291|(ABE;-;@17;NG;TAT:TAC;Y:Y;)	ENST00000226760	291	Y	GGGGTACTTGACCACCTGGGGG
ENST00000226760|4|+|6300644|6300689|291|(ABE;-;@16;NG;TAT:TAC;Y:Y;)	ENST00000226760	291	Y	GGGGGTACTTGACCACCTGGGG
ENST00000226760|4|+|6300644|6300689|291|(ABE;-;@15;NG;TAT:TAC;Y:Y;)	ENST00000226760	291	Y	AGGGGGTACTTGACCACCTGGG
ENST00000226760|4|+|6300710|6300755|313|(ABE;-;@15;NGG;TAC:CAC;Y:H;)	ENST00000226760	313	H	CCAGTGCATGCCTGCCCTGGAGG
ENST00000226760|4|+|6300710|6300755|313|(ABE;-;@16;NG;TAC:CAC;Y:H;)	ENST00000226760	313	H	CAGTGCATGCCTGCCCTGGAGG
ENST00000226760|4|+|6300710|6300755|313|(ABE;-;@15;NG;TAC:CAC;Y:H;)	ENST00000226760	313	H	CCAGTGCATGCCTGCCCTGGAG
ENST00000226760|4|+|6300710|6300755|313|(ABE;-;@13;NG;TAC:CAC;Y:H;)	ENST00000226760	313	H	AGCCAGTGCATGCCTGCCCTGG
ENST00000226760|4|+|6300746|6300791|325|(ABE;-;@17;NG;AAT:AAC;N:N;)	ENST00000226760	325	N	CGCGTTGATGTGGTGCGTGGGG
ENST00000226760|4|+|6300854|6300899|361|(ABE;-;@13;NGG;ATC:ACC;I:T;)	ENST00000226760	361	T	CTTGAGGGTGCAGATCACCATGG
ENST00000226760|4|+|6300854|6300899|361|(ABE;-;@14;NG;ATC:ACC;I:T;)	ENST00000226760	361	T	TTGAGGGTGCAGATCACCATGG
ENST00000226760|4|+|6300854|6300899|361|(ABE;-;@13;NG;ATC:ACC;I:T;)	ENST00000226760	361	T	CTTGAGGGTGCAGATCACCATG
ENST00000226760|4|+|6300926|6300971|385|(ABE;+;@14;NG;AAG:GAG;K:E;)	ENST00000226760	385	E	CGCTTCGAGCCCAACCTGGATG
ENST00000226760|4|+|6300926|6300971|385|(ABE;+;@16;NG;AAG:GAG;K:E;)	ENST00000226760	385	E	CTTCGAGCCCAACCTGGATGTG
ENST00000226760|4|+|6300926|6300971|385|(ABE;+;@17;NG;AAG:GAG;K:E;)	ENST00000226760	385	E	TTCGAGCCCAACCTGGATGTGG
ENST00000226760|4|+|6300926|6300971|385|(ABE;+;@16;NGG;AAG:GAG;K:E;)	ENST00000226760	385	E	CTTCGAGCCCAACCTGGATGTGG
ENST00000226760|4|+|6301049|6301094|426|(ABE;+;@13;NG;TAC:TGC;Y:C;)	ENST00000226760	426	C	AAGGACTGCATCCCCTGCTCGG
ENST00000226760|4|+|6301049|6301094|426|(ABE;+;@15;NG;TAC:TGC;Y:C;)	ENST00000226760	426	C	GGACTGCATCCCCTGCTCGGAG
ENST00000226760|4|+|6301067|6301112|432|(ABE;+;@13;NG;CTA:CTG;L:L;)	ENST00000226760	432	L	CGGAGCTGGCTGTCATCACCGG
ENST00000226760|4|+|6301067|6301112|432|(ABE;-;@15;NG;TTG:CTG;L:L;)	ENST00000226760	432	L	AGCCAGCTCCGAGCAGGGGATG
ENST00000226760|4|+|6301262|6301307|497|(ABE;-;@16;NG;GTT:GTC;V:V;)	ENST00000226760	497	V	GGACGACCAGGTGGCCGACAGG
ENST00000226760|4|+|6301271|6301316|500|(ABE;-;@13;NGG;AAT:AAC;N:N;)	ENST00000226760	500	N	CGCTGACGTTGAGGACGACCAGG
ENST00000226760|4|+|6301271|6301316|500|(ABE;-;@17;NG;AAT:AAC;N:N;)	ENST00000226760	500	N	GACGTTGAGGACGACCAGGTGG
ENST00000226760|4|+|6301271|6301316|500|(ABE;-;@14;NG;AAT:AAC;N:N;)	ENST00000226760	500	N	GCTGACGTTGAGGACGACCAGG
ENST00000226760|4|+|6301271|6301316|500|(ABE;-;@13;NG;AAT:AAC;N:N;)	ENST00000226760	500	N	CGCTGACGTTGAGGACGACCAG
ENST00000226760|4|+|6301283|6301328|504|(ABE;-;@15;NGG;CTG:CCG;L:P;)	ENST00000226760	504	P	GGCACGGGACGCTGACGTTGAGG
ENST00000226760|4|+|6301283|6301328|504|(ABE;-;@16;NG;CTG:CCG;L:P;)	ENST00000226760	504	P	GCACGGGACGCTGACGTTGAGG
ENST00000226760|4|+|6301283|6301328|504|(ABE;-;@15;NG;CTG:CCG;L:P;)	ENST00000226760	504	P	GGCACGGGACGCTGACGTTGAG
ENST00000226760|4|+|6301283|6301328|504|(ABE;-;@13;NG;CTG:CCG;L:P;)	ENST00000226760	504	P	CAGGCACGGGACGCTGACGTTG
ENST00000226760|4|+|6301301|6301346|510|(ABE;-;@13;NGG;TAT:TAC;Y:Y;)	ENST00000226760	510	Y	AGAGCAGGTAGACATAGAGCAGG
ENST00000226760|4|+|6301301|6301346|510|(ABE;-;@14;NG;TAT:TAC;Y:Y;)	ENST00000226760	510	Y	GAGCAGGTAGACATAGAGCAGG
ENST00000226760|4|+|6301301|6301346|510|(ABE;-;@13;NG;TAT:TAC;Y:Y;)	ENST00000226760	510	Y	AGAGCAGGTAGACATAGAGCAG
ENST00000226760|4|+|6301370|6301415|533|(ABE;-;@15;NGG;TCC:CCC;S:P;)	ENST00000226760	533	P	GTAGGGCACAAGGTAGCAGTAGG
ENST00000226760|4|+|6301370|6301415|533|(ABE;-;@16;NG;TCC:CCC;S:P;)	ENST00000226760	533	P	TAGGGCACAAGGTAGCAGTAGG
ENST00000226760|4|+|6301370|6301415|533|(ABE;-;@15;NG;TCC:CCC;S:P;)	ENST00000226760	533	P	GTAGGGCACAAGGTAGCAGTAG
ENST00000226760|4|+|6301445|6301490|558|(ABE;-;@15;NGG;TGC:CGC;C:R;)	ENST00000226760	558	R	GGCGCGGAGCAGCCCCAGGCCGG
ENST00000226760|4|+|6301445|6301490|558|(ABE;-;@16;NG;TGC:CGC;C:R;)	ENST00000226760	558	R	GCGCGGAGCAGCCCCAGGCCGG
ENST00000226760|4|+|6301445|6301490|558|(ABE;-;@15;NG;TGC:CGC;C:R;)	ENST00000226760	558	R	GGCGCGGAGCAGCCCCAGGCCG
ENST00000226760|4|+|6301445|6301490|558|(ABE;-;@17;NGG;CGT:CGC;R:R;)	ENST00000226760	558	R	GGCGCGGAGCAGCCCCAGGCCGG
ENST00000226760|4|+|6301445|6301490|558|(ABE;-;@13;NGG;CGT:CGC;R:R;)	ENST00000226760	558	R	TGGAGGCGCGGAGCAGCCCCAGG
ENST00000226760|4|+|6301445|6301490|558|(ABE;-;@17;NG;CGT:CGC;R:R;)	ENST00000226760	558	R	GGCGCGGAGCAGCCCCAGGCCG
ENST00000226760|4|+|6301445|6301490|558|(ABE;-;@13;NG;CGT:CGC;R:R;)	ENST00000226760	558	R	TGGAGGCGCGGAGCAGCCCCAG
ENST00000226760|4|+|6301496|6301541|575|(ABE;-;@17;NGG;GCT:GCC;A:A;)	ENST00000226760	575	A	GCCGGCCACCAGGATGGGGAGGG
ENST00000226760|4|+|6301496|6301541|575|(ABE;-;@17;NG;GCT:GCC;A:A;)	ENST00000226760	575	A	GCCGGCCACCAGGATGGGGAGG
ENST00000226760|4|+|6301514|6301559|581|(ABE;-;@17;NGG;GGT:GGC;G:G;)	ENST00000226760	581	G	CACGCCCACCAGGGCCAGGCCGG
ENST00000226760|4|+|6301514|6301559|581|(ABE;-;@13;NGG;GGT:GGC;G:G;)	ENST00000226760	581	G	GCAGCACGCCCACCAGGGCCAGG
ENST00000226760|4|+|6301514|6301559|581|(ABE;-;@17;NG;GGT:GGC;G:G;)	ENST00000226760	581	G	CACGCCCACCAGGGCCAGGCCG
ENST00000226760|4|+|6301514|6301559|581|(ABE;-;@14;NG;GGT:GGC;G:G;)	ENST00000226760	581	G	CAGCACGCCCACCAGGGCCAGG
ENST00000226760|4|+|6301514|6301559|581|(ABE;-;@13;NG;GGT:GGC;G:G;)	ENST00000226760	581	G	GCAGCACGCCCACCAGGGCCAG
ENST00000226760|4|+|6301658|6301703|629|(ABE;+;@15;NG;CAG:CGG;Q:R;)	ENST00000226760	629	R	GACGCGGAGCTCCATGGTCAAG
ENST00000226760|4|+|6301673|6301718|634|(Target-AID;-;@17;NG;AGG:AAG;R:K;)	ENST00000226760	634	K	AGCTTGACCATGGAGCTCCGCG
ENST00000226760|4|+|6301826|6301871|685|(ABE;+;@17;NG;CAC:CGC;H:R;)	ENST00000226760	685	R	CGCGCACCCAGATCCTCTGCAG
ENST00000226760|4|+|6301856|6301901|695|(ABE;+;@14;NG;GAC:GGC;D:G;)	ENST00000226760	695	G	TGGAGGGCCACAGGGTCACGTG
ENST00000226760|4|+|6301856|6301901|695|(ABE;+;@14;NGG;GAC:GGC;D:G;)	ENST00000226760	695	G	TGGAGGGCCACAGGGTCACGTGG
ENST00000226760|4|+|6301895|6301940|708|(ABE;-;@17;NG;CGT:CGC;R:R;)	ENST00000226760	708	R	CACGCGGACGTACTTGAAGCGG
ENST00000226760|4|+|6301895|6301940|708|(ABE;-;@14;NG;CGT:CGC;R:R;)	ENST00000226760	708	R	AGTCACGCGGACGTACTTGAAG
ENST00000226760|4|+|6301922|6301967|717|(ABE;+;@16;NG;AAG:GAG;K:E;)	ENST00000226760	717	E	CGCCGAGTCTGCCATCAACATG
ENST00000226760|4|+|6301943|6301988|724|(ABE;-;@16;NG;TCG:CCG;S:P;)	ENST00000226760	724	P	AACGGGAGCATGTTGATGGCAG
ENST00000226760|4|+|6301943|6301988|724|(ABE;-;@17;NG;CTG:CCG;L:P;)	ENST00000226760	724	P	AACGGGAGCATGTTGATGGCAG
ENST00000226760|4|+|6301961|6302006|730|(ABE;+;@16;NG;TAG:TGG;*:W;)	ENST00000226760	730	W	GACTGGATGCGCTGCCTCTACG
ENST00000226760|4|+|6301961|6302006|730|(ABE;+;@17;NG;TAG:TGG;*:W;)	ENST00000226760	730	W	ACTGGATGCGCTGCCTCTACGG
ENST00000226760|4|+|6301961|6302006|730|(ABE;+;@16;NGG;TAG:TGG;*:W;)	ENST00000226760	730	W	GACTGGATGCGCTGCCTCTACGG
ENST00000226760|4|+|6301961|6302006|730|(ABE;+;@15;NG;TGA:TGG;*:W;)	ENST00000226760	730	W	GACTGGATGCGCTGCCTCTACG
ENST00000226760|4|+|6301961|6302006|730|(ABE;+;@16;NG;TGA:TGG;*:W;)	ENST00000226760	730	W	ACTGGATGCGCTGCCTCTACGG
ENST00000226760|4|+|6301961|6302006|730|(ABE;+;@15;NGG;TGA:TGG;*:W;)	ENST00000226760	730	W	GACTGGATGCGCTGCCTCTACGG
ENST00000226760|4|+|6301967|6302012|732|(ABE;+;@13;NG;CAC:CGC;H:R;)	ENST00000226760	732	R	TGGATGCGCTGCCTCTACGGCG
ENST00000226760|4|+|6301982|6302027|737|(ABE;+;@15;NG;AAG:GAG;K:E;)	ENST00000226760	737	E	ACGGCGAGGCCTACCCTGCCTG
ENST00000226760|4|+|6302036|6302081|755|(Target-AID;+;@17;NG;CGT:TGT;R:C;)	ENST00000226760	755	C	CTCTGTCGCCTTAAGCTGCTGG
ENST00000226760|4|+|6302093|6302138|774|(ABE;+;@16;NG;AAA:AAG;K:K;)	ENST00000226760	774	K	ACAAGTTTGAGATTACCGTGGG
ENST00000226760|4|+|6302111|6302156|780|(ABE;+;@17;NG;AGC:GGC;S:G;)	ENST00000226760	780	G	GTGGGCATGCCATTCAGCAGCG
ENST00000226760|4|+|6302111|6302156|780|(ABE;+;@17;NGG;AGC:GGC;S:G;)	ENST00000226760	780	G	GTGGGCATGCCATTCAGCAGCGG
ENST00000226760|4|+|6302141|6302186|790|(ABE;-;@16;NG;TTG:TCG;L:S;)	ENST00000226760	790	S	GCGCGAGCCGTCAGCGCCGCTG
ENST00000226760|4|+|6302195|6302240|808|(ABE;-;@13;NG;AGT:AGC;S:S;)	ENST00000226760	808	S	TGAACTCGCTGCTGGCCCGCAG
ENST00000226760|4|+|6302198|6302243|809|(ABE;+;@13;NG;AAG:GAG;K:E;)	ENST00000226760	809	E	CAGCAGCGAGTTCAAGAGCGTG
ENST00000226760|4|+|6302198|6302243|809|(ABE;+;@16;NG;AAG:GAG;K:E;)	ENST00000226760	809	E	CAGCGAGTTCAAGAGCGTGCTG
ENST00000226760|4|+|6302204|6302249|811|(ABE;+;@17;NG;AAA:AAG;K:K;)	ENST00000226760	811	K	CAAGAGCGTGCTGCTCAGCCTG
ENST00000226760|4|+|6302225|6302270|818|(ABE;-;@15;NG;TGC:CGC;C:R;)	ENST00000226760	818	R	CTGGCGCAGGCTGAGCAGCACG
ENST00000226760|4|+|6302348|6302393|859|(ABE;+;@13;NG;CAG:CGG;Q:R;)	ENST00000226760	859	R	ACCAGGCGGCACGTGAAGATCG
ENST00000226760|4|+|6302363|6302408|864|(ABE;+;@15;NG;AAG:GAG;K:E;)	ENST00000226760	864	E	AGATCGAGCACGACTGGCGCAG
ENST00000226760|4|+|6302375|6302420|868|(ABE;+;@16;NG;CAC:CGC;H:R;)	ENST00000226760	868	R	TGGCGCAGCACCGTGCATGGCG
ENST00000226760|4|+|6302384|6302429|871|(ABE;+;@13;NG;ATG:GTG;M:V;)	ENST00000226760	871	V	CAGCACCGTGCATGGCGCCGTG
ENST00000226760|4|+|6302426|6302471|885|(ABE;-;@16;NG;CTA:CCA;L:P;)	ENST00000226760	885	P	GAATGGGAAGAAAAAGAAGTCG
ENST00000227667|11|+|116830822|116830867|43|(ABE;+;@13;NG;ACC:GCC;T:A;)	ENST00000227667	43	A	CAAGACCGCCAAGGATGCACTG
ENST00000227752|11|+|117989481|117989526|84|(ABE;-;@15;NGG;ATC:ACC;I:T;)	ENST00000227752	84	T	CTGCGGTAAGGTCATAGGACAGG
ENST00000227752|11|+|117989481|117989526|84|(ABE;-;@15;NG;ATC:ACC;I:T;)	ENST00000227752	84	T	CTGCGGTAAGGTCATAGGACAG
ENST00000227752|11|+|117989532|117989577|101|(ABE;-;@15;NG;TGG:CGG;W:R;)	ENST00000227752	101	R	AGCCCGCACTCTGGCCCGGTAG
ENST00000227868|11|+|34966718|34966763|248|(ABE;-;@16;NG;TAG:CAG;*:Q;)	ENST00000227868	248	Q	GCCTGTAGGGGCGAAGGTGCTG
ENST00000228318|12|+|98595467|98595512|72|(ABE;+;@13;NG;GAA:GGA;E:G;)	ENST00000228318	72	G	CTTGGAGGAATTATTAGCTGTG
ENST00000228318|12|+|98595467|98595512|72|(ABE;+;@13;NGG;GAA:GGA;E:G;)	ENST00000228318	72	G	CTTGGAGGAATTATTAGCTGTGG
ENST00000228510|12|+|109576018|109576063|41|(Target-AID;+;@17;NG;CCT:CTT;P:L;)	ENST00000228510	41	L	GGCTTCAACCCCACAGCAATGG
ENST00000228510|12|+|109576018|109576063|41|(Target-AID;+;@18;NG;CCT:CTT;P:L;)	ENST00000228510	41	L	GCTTCAACCCCACAGCAATGGG
ENST00000228510|12|+|109576018|109576063|41|(Target-AID;+;@17;NGG;CCT:CTT;P:L;)	ENST00000228510	41	L	GGCTTCAACCCCACAGCAATGGG
ENST00000228510|12|+|109576051|109576096|52|(ABE;+;@13;NG;AAC:AGC;N:S;)	ENST00000228510	52	S	GACCTCAGCTTACCCAACATTG
ENST00000228510|12|+|109576051|109576096|52|(ABE;+;@14;NG;AAC:AGC;N:S;)	ENST00000228510	52	S	ACCTCAGCTTACCCAACATTGG
ENST00000228510|12|+|109576051|109576096|52|(ABE;+;@13;NGG;AAC:AGC;N:S;)	ENST00000228510	52	S	GACCTCAGCTTACCCAACATTGG
ENST00000228510|12|+|109579791|109579836|80|(ABE;+;@17;NG;ATC:GTC;I:V;)	ENST00000228510	80	V	GATGTCACAACACCCACCTCAG
ENST00000228510|12|+|109579899|109579944|116|(Target-AID;+;@19;NG;CAC:TAC;H:Y;)	ENST00000228510	116	Y	ATACCTGTCCATCTGCCGGAAG
ENST00000228510|12|+|109581404|109581449|135|(ABE;+;@15;NG;TCA:TCG;S:S;)	ENST00000228510	135	S	TGGTCGGAGCTGCCCCCCGGGG
ENST00000228510|12|+|109581404|109581449|135|(ABE;+;@17;NG;TCA:TCG;S:S;)	ENST00000228510	135	S	GTCGGAGCTGCCCCCCGGGGCG
ENST00000228510|12|+|109581404|109581449|135|(ABE;+;@17;NGG;TCA:TCG;S:S;)	ENST00000228510	135	S	GTCGGAGCTGCCCCCCGGGGCGG
ENST00000228510|12|+|109581443|109581488|148|(ABE;+;@17;NG;ACC:GCC;T:A;)	ENST00000228510	148	A	GCCGCCTACTCGGTGTGTCTGG
ENST00000228510|12|+|109581494|109581539|165|(ABE;-;@17;NG;CTA:CCA;L:P;)	ENST00000228510	165	P	TTTGGGATCTCCTCGCACACAG
ENST00000228510|12|+|109586743|109586788|215|(ABE;-;@16;NG;TGA:CGA;*:R;)	ENST00000228510	215	R	TATCGGAGGGCTCCTCCTAAAG
ENST00000228510|12|+|109595021|109595066|301|(Target-AID;-;@19;NGG;AGC:AAC;S:N;)	ENST00000228510	301	N	GTTCATGTCAATGAGCTCCTAGG
ENST00000228510|12|+|109595021|109595066|301|(Target-AID;-;@19;NG;AGC:AAC;S:N;)	ENST00000228510	301	N	GTTCATGTCAATGAGCTCCTAG
ENST00000228510|12|+|109595042|109595087|308|(ABE;-;@16;NG;CTT:CTC;L:L;)	ENST00000228510	308	L	CGCCGAGGGCATTCAGATGGTG
ENST00000228510|12|+|109595042|109595087|308|(ABE;-;@14;NG;CTT:CTC;L:L;)	ENST00000228510	308	L	CACGCCGAGGGCATTCAGATGG
ENST00000228510|12|+|109595120|109595165|334|(ABE;+;@15;NG;ACA:GCA;T:A;)	ENST00000228510	334	A	CTGGCGCAGGCGGTGGTGGCTG
ENST00000228510|12|+|109595120|109595165|334|(ABE;+;@17;NG;ACA:GCA;T:A;)	ENST00000228510	334	A	GGCGCAGGCGGTGGTGGCTGTG
ENST00000228510|12|+|109595120|109595165|334|(ABE;+;@17;NGG;ACA:GCA;T:A;)	ENST00000228510	334	A	GGCGCAGGCGGTGGTGGCTGTGG
ENST00000228510|12|+|109596457|109596502|365|(Target-AID;+;@17;NG;TCT:TTT;S:F;)	ENST00000228510	365	F	GCTTTGACTGCTTGGAAACCAG
ENST00000228510|12|+|109596526|109596571|388|(ABE;-;@13;NG;TGA:CGA;*:R;)	ENST00000228510	388	R	TGGACTCGGCTGTCCAGGGAGG
ENST00000228872|12|+|12718043|12718088|76|(ABE;+;@16;NG;TAG:TGG;*:W;)	ENST00000228872	76	W	GAGTGGCAAGAGGTGGAGAAGG
ENST00000228872|12|+|12718043|12718088|76|(ABE;+;@16;NGG;TAG:TGG;*:W;)	ENST00000228872	76	W	GAGTGGCAAGAGGTGGAGAAGGG
ENST00000228872|12|+|12718043|12718088|76|(ABE;+;@15;NG;TGA:TGG;*:W;)	ENST00000228872	76	W	GAGTGGCAAGAGGTGGAGAAGG
ENST00000228872|12|+|12718043|12718088|76|(ABE;+;@15;NGG;TGA:TGG;*:W;)	ENST00000228872	76	W	GAGTGGCAAGAGGTGGAGAAGGG
ENST00000228872|12|+|12718082|12718127|89|(ABE;-;@17;NG;TAT:TAC;Y:Y;)	ENST00000228872	89	Y	TCTGTAGTAGAACTCGGGCAAG
ENST00000229179|12|+|68690722|68690767|101|(ABE;+;@15;NG;ATA:ATG;I:M;)	ENST00000229179	101	M	TCCATGGTATGTAGAAAAATAG
ENST00000229179|12|+|68690722|68690767|101|(ABE;+;@16;NG;ATA:ATG;I:M;)	ENST00000229179	101	M	CCATGGTATGTAGAAAAATAGG
ENST00000229179|12|+|68690722|68690767|101|(ABE;+;@17;NG;ATA:ATG;I:M;)	ENST00000229179	101	M	CATGGTATGTAGAAAAATAGGG
ENST00000229179|12|+|68690722|68690767|101|(ABE;+;@15;NGG;ATA:ATG;I:M;)	ENST00000229179	101	M	TCCATGGTATGTAGAAAAATAGG
ENST00000229179|12|+|68690722|68690767|101|(ABE;+;@16;NGG;ATA:ATG;I:M;)	ENST00000229179	101	M	CCATGGTATGTAGAAAAATAGGG
ENST00000229264|12|+|6843050|6843095|67|(ABE;-;@13;NG;TTT:TCT;F:S;)	ENST00000229264	67	S	TCACTTAGAATCAGTGGCCCAG
ENST00000229264|12|+|6846868|6846913|339|(ABE;+;@15;NG;TAG:TGG;*:W;)	ENST00000229264	339	W	AATCTGGAACTGAGGAGGCTGG
ENST00000229264|12|+|6846868|6846913|339|(ABE;+;@14;NG;TGA:TGG;*:W;)	ENST00000229264	339	W	AATCTGGAACTGAGGAGGCTGG
ENST00000229270|12|+|6869278|6869323|160|(ABE;+;@17;NG;AGA:GGA;R:G;)	ENST00000229270	160	G	CTCGGAGTAATCGCCTGCATTG
ENST00000229270|12|+|6869278|6869323|160|(ABE;+;@17;NGG;AGA:GGA;R:G;)	ENST00000229270	160	G	CTCGGAGTAATCGCCTGCATTGG
ENST00000229281|12|+|6944585|6944630|62|(ABE;-;@16;NGG;TAG:CAG;*:Q;)	ENST00000229281	62	Q	TGCTGGATCTGCGTGGCCACGGG
ENST00000229281|12|+|6944585|6944630|62|(ABE;-;@15;NGG;TAG:CAG;*:Q;)	ENST00000229281	62	Q	CTGCTGGATCTGCGTGGCCACGG
ENST00000229281|12|+|6944585|6944630|62|(ABE;-;@17;NG;TAG:CAG;*:Q;)	ENST00000229281	62	Q	GCTGGATCTGCGTGGCCACGGG
ENST00000229281|12|+|6944585|6944630|62|(ABE;-;@16;NG;TAG:CAG;*:Q;)	ENST00000229281	62	Q	TGCTGGATCTGCGTGGCCACGG
ENST00000229281|12|+|6944585|6944630|62|(ABE;-;@15;NG;TAG:CAG;*:Q;)	ENST00000229281	62	Q	CTGCTGGATCTGCGTGGCCACG
ENST00000229447|6|+|150389452|150389497|101|(ABE;-;@14;NG;TGG:CGG;W:R;)	ENST00000229447	101	R	CTGACCGTCTCTTATTGAGAAG
ENST00000229447|6|+|150394204|150394249|220|(ABE;+;@13;NG;ACT:GCT;T:A;)	ENST00000229447	220	A	TTCCATCGCTTGTGGCATCCTG
ENST00000229554|6|+|116616743|116616788|48|(ABE;+;@13;NG;GGA:GGG;G:G;)	ENST00000229554	48	G	AGCAGGGGCCAGAAACTGGACG
ENST00000229554|6|+|116616743|116616788|48|(ABE;+;@17;NG;GGA:GGG;G:G;)	ENST00000229554	48	G	GGGGCCAGAAACTGGACGCCAG
ENST00000229554|6|+|116616926|116616971|109|(ABE;-;@15;NG;TAG:CAG;*:Q;)	ENST00000229554	109	Q	CGACTGAGGTGGTGCCGCGAGG
ENST00000229554|6|+|116617061|116617106|154|(ABE;-;@15;NG;TAG:CAG;*:Q;)	ENST00000229554	154	Q	TTGCTGAGACTGTTGAAAGGTG
ENST00000229554|6|+|116622789|116622834|244|(ABE;+;@13;NG;CAT:CGT;H:R;)	ENST00000229554	244	R	AATGAGCGTCCTGAAAATGCTG
ENST00000229554|6|+|116627613|116627658|310|(ABE;-;@13;NG;AAT:AAC;N:N;)	ENST00000229554	310	N	GAAGAGCGTTTTCTGCCTGGGG
ENST00000229554|6|+|116628036|116628081|451|(ABE;-;@13;NGG;TAA:CAA;*:Q;)	ENST00000229554	451	Q	ACAATTTGTGCAGGTATAACTGG
ENST00000229554|6|+|116628036|116628081|451|(ABE;-;@17;NG;TAA:CAA;*:Q;)	ENST00000229554	451	Q	TTTGTGCAGGTATAACTGGTGG
ENST00000229554|6|+|116628036|116628081|451|(ABE;-;@13;NG;TAA:CAA;*:Q;)	ENST00000229554	451	Q	ACAATTTGTGCAGGTATAACTG
ENST00000229554|6|+|116632258|116632303|664|(ABE;-;@13;NGG;TCA:CCA;S:P;)	ENST00000229554	664	P	TAAACTGGTGGTGGAACTGGGGG
ENST00000229554|6|+|116632258|116632303|664|(ABE;-;@13;NG;TCA:CCA;S:P;)	ENST00000229554	664	P	TAAACTGGTGGTGGAACTGGGG
ENST00000229554|6|+|116632366|116632411|700|(ABE;-;@14;NG;GTT:GCT;V:A;)	ENST00000229554	700	A	TTCTCAGCTGCGAGTAGAACTG
ENST00000229769|6|+|35455897|35455942|141|(ABE;-;@15;NGG;TGA:CGA;*:R;)	ENST00000229769	141	R	CCTTCGCAGCAATTCCCCCAGGG
ENST00000229769|6|+|35455897|35455942|141|(ABE;-;@16;NG;TGA:CGA;*:R;)	ENST00000229769	141	R	CTTCGCAGCAATTCCCCCAGGG
ENST00000229769|6|+|35455897|35455942|141|(ABE;-;@15;NG;TGA:CGA;*:R;)	ENST00000229769	141	R	CCTTCGCAGCAATTCCCCCAGG
ENST00000230124|6|+|109691462|109691507|17|(Target-AID;+;@18;NG;CCG:CTG;P:L;)	ENST00000230124	17	L	TCTGTATGAGACTAGAGCTGTG
ENST00000230529|6|+|112061152|112061197|78|(Target-AID;+;@17;NG;CGT:TGT;R:C;)	ENST00000230529	78	C	ATCTGTGCCAAGCAACCAGGGG
ENST00000230529|6|+|112069524|112069569|331|(ABE;+;@15;NG;TAG:TGG;*:W;)	ENST00000230529	331	W	GCTGTGGATTACATCTTGTGTG
ENST00000230529|6|+|112069524|112069569|331|(ABE;+;@17;NG;TAG:TGG;*:W;)	ENST00000230529	331	W	TGTGGATTACATCTTGTGTGTG
ENST00000230529|6|+|112069524|112069569|331|(ABE;+;@14;NG;TGA:TGG;*:W;)	ENST00000230529	331	W	GCTGTGGATTACATCTTGTGTG
ENST00000230529|6|+|112069524|112069569|331|(ABE;+;@16;NG;TGA:TGG;*:W;)	ENST00000230529	331	W	TGTGGATTACATCTTGTGTGTG
ENST00000230732|5|+|146340072|146340117|223|(Target-AID;+;@17;NG;CCG:CTG;P:L;)	ENST00000230732	223	L	CGCTGAGCCAAAGCACCATCTG
ENST00000230732|5|+|146340270|146340315|289|(ABE;-;@13;NGG;TTC:CTC;F:L;)	ENST00000230732	289	L	GCCTCGAGTGAACGCTTCTCCGG
ENST00000230732|5|+|146340270|146340315|289|(ABE;-;@14;NG;TTC:CTC;F:L;)	ENST00000230732	289	L	CCTCGAGTGAACGCTTCTCCGG
ENST00000230732|5|+|146340270|146340315|289|(ABE;-;@13;NG;TTC:CTC;F:L;)	ENST00000230732	289	L	GCCTCGAGTGAACGCTTCTCCG
ENST00000230882|5|+|42694908|42694953|94|(ABE;+;@16;NG;TAG:TGG;*:W;)	ENST00000230882	94	W	GAATGGACTCAAGAATGGAAAG
ENST00000230882|5|+|42694908|42694953|94|(ABE;+;@15;NG;TGA:TGG;*:W;)	ENST00000230882	94	W	GAATGGACTCAAGAATGGAAAG
ENST00000230882|5|+|42699864|42699909|168|(Target-AID;+;@19;NG;CAC:CAT;H:H;)	ENST00000230882	168	H	ATGCAGATATCCAAGTGAGATG
ENST00000230882|5|+|42699864|42699909|168|(Target-AID;+;@19;NGG;CAC:CAT;H:H;)	ENST00000230882	168	H	ATGCAGATATCCAAGTGAGATGG
ENST00000231790|3|+|36993526|36993571|1|(ABE;+;@15;NG;ATA:ATG;I:M;)	ENST00000231790	1	M	AAAATGTCGTTCGTGGCAGGGG
ENST00000231790|3|+|36993601|36993646|26|(ABE;-;@16;NG;TAG:CAG;*:Q;)	ENST00000231790	26	Q	CGCTGGATAACTTCCCCCGCCG
ENST00000231790|3|+|36993634|36993679|37|(ABE;+;@15;NG;AAG:GAG;K:E;)	ENST00000231790	37	E	TGATTGAGAACTGGTACGGAGG
ENST00000231790|3|+|36993634|36993679|37|(ABE;+;@15;NGG;AAG:GAG;K:E;)	ENST00000231790	37	E	TGATTGAGAACTGGTACGGAGGG
ENST00000231790|3|+|36993637|36993682|38|(Target-AID;-;@19;NG;GAC:AAC;D:N;)	ENST00000231790	38	N	TTCTCAATCATCTCTTTGATAG
ENST00000231790|3|+|36996610|36996655|44|(ABE;-;@16;NGG;TTC:TCC;F:S;)	ENST00000231790	44	S	TGTGGATTTTGCATCTAAACTGG
ENST00000231790|3|+|36996610|36996655|44|(ABE;-;@17;NG;TTC:TCC;F:S;)	ENST00000231790	44	S	GTGGATTTTGCATCTAAACTGG
ENST00000231790|3|+|36996610|36996655|44|(ABE;-;@16;NG;TTC:TCC;F:S;)	ENST00000231790	44	S	TGTGGATTTTGCATCTAAACTG
ENST00000231790|3|+|36996664|36996709|62|(ABE;-;@17;NGG;TAA:CAA;*:Q;)	ENST00000231790	62	Q	CTTGGATCTGAATCAACTTCAGG
ENST00000231790|3|+|36996664|36996709|62|(ABE;-;@17;NG;TAA:CAA;*:Q;)	ENST00000231790	62	Q	CTTGGATCTGAATCAACTTCAG
ENST00000231790|3|+|36996673|36996718|65|(ABE;+;@17;NG;GAC:GGC;D:G;)	ENST00000231790	65	G	ATGGCACCGGGATCAGGGTAAG
ENST00000231790|3|+|37000942|37000987|73|(Target-AID;+;@17;NG;CCG:CTG;P:L;)	ENST00000231790	73	L	ATCTGGATATTGTATGTGAAAG
ENST00000231790|3|+|37000942|37000987|73|(Target-AID;+;@18;NG;CCG:CTG;P:L;)	ENST00000231790	73	L	TCTGGATATTGTATGTGAAAGG
ENST00000231790|3|+|37000942|37000987|73|(Target-AID;+;@17;NGG;CCG:CTG;P:L;)	ENST00000231790	73	L	ATCTGGATATTGTATGTGAAAGG
ENST00000231790|3|+|37000981|37001026|86|(ABE;-;@15;NG;TAG:CAG;*:Q;)	ENST00000231790	86	Q	GGACTGCAGTTTACTAGTAGTG
ENST00000231790|3|+|37000981|37001026|86|(ABE;-;@13;NG;TAG:CAG;*:Q;)	ENST00000231790	86	Q	AAGGACTGCAGTTTACTAGTAG
ENST00000231790|3|+|37001026|37001071|101|(ABE;+;@15;NG;AGT:GGT;S:G;)	ENST00000231790	101	G	TTCGAGGTGAGGTAAGCTAAAG
ENST00000231790|3|+|37001026|37001071|101|(ABE;+;@14;NG;GAT:GGT;D:G;)	ENST00000231790	101	G	TTCGAGGTGAGGTAAGCTAAAG
ENST00000231790|3|+|37004403|37004448|111|(ABE;-;@17;NG;GTT:GCT;V:A;)	ENST00000231790	111	A	TGAGCCACATGGCTTATGCTGG
ENST00000231790|3|+|37007024|37007069|146|(ABE;-;@14;NG;TAA:CAA;*:Q;)	ENST00000231790	146	Q	TCCCTTGATTGCCAGCACATGG
ENST00000231790|3|+|37007039|37007084|151|(ABE;+;@15;NG;ACA:ACG;T:T;)	ENST00000231790	151	T	ATCACGGTAAGAATGGTACATG
ENST00000231790|3|+|37007039|37007084|151|(ABE;+;@16;NG;ACA:ACG;T:T;)	ENST00000231790	151	T	TCACGGTAAGAATGGTACATGG
ENST00000231790|3|+|37007039|37007084|151|(ABE;+;@15;NGG;ACA:ACG;T:T;)	ENST00000231790	151	T	ATCACGGTAAGAATGGTACATGG
ENST00000231790|3|+|37007039|37007084|151|(ABE;+;@16;NGG;ACA:ACG;T:T;)	ENST00000231790	151	T	TCACGGTAAGAATGGTACATGGG
ENST00000231790|3|+|37014483|37014528|251|(ABE;-;@17;NG;TAT:TAC;Y:Y;)	ENST00000231790	251	Y	TGAGTAGTTTGCATTGGATATG
ENST00000231790|3|+|37017486|37017531|265|(ABE;-;@16;NG;TGT:CGT;C:R;)	ENST00000231790	265	R	AGACGATCTAAACAATAAAAAG
ENST00000231790|3|+|37017534|37017579|281|(ABE;-;@16;NGG;GTA:GCA;V:A;)	ENST00000231790	281	A	GGCTGCATACACTGTTTCTATGG
ENST00000231790|3|+|37017534|37017579|281|(ABE;-;@16;NG;GTA:GCA;V:A;)	ENST00000231790	281	A	GGCTGCATACACTGTTTCTATG
ENST00000231790|3|+|37017534|37017579|281|(Target-AID;-;@17;NGG;GCG:GCA;A:A;)	ENST00000231790	281	A	GGCTGCATACACTGTTTCTATGG
ENST00000231790|3|+|37017534|37017579|281|(Target-AID;-;@18;NG;GCG:GCA;A:A;)	ENST00000231790	281	A	GCTGCATACACTGTTTCTATGG
ENST00000231790|3|+|37017534|37017579|281|(Target-AID;-;@17;NG;GCG:GCA;A:A;)	ENST00000231790	281	A	GGCTGCATACACTGTTTCTATG
ENST00000231790|3|+|37017573|37017618|294|(ABE;-;@13;NGG;CTT:CTC;L:L;)	ENST00000231790	294	L	ATTACCTGAGGTACAGGAATGGG
ENST00000231790|3|+|37017573|37017618|294|(ABE;-;@16;NG;CTT:CTC;L:L;)	ENST00000231790	294	L	ACCTGAGGTACAGGAATGGGTG
ENST00000231790|3|+|37017573|37017618|294|(ABE;-;@14;NG;CTT:CTC;L:L;)	ENST00000231790	294	L	TTACCTGAGGTACAGGAATGGG
ENST00000231790|3|+|37017573|37017618|294|(ABE;-;@13;NG;CTT:CTC;L:L;)	ENST00000231790	294	L	ATTACCTGAGGTACAGGAATGG
ENST00000231790|3|+|37020292|37020337|297|(ABE;+;@13;NG;AAA:GAA;K:E;)	ENST00000231790	297	E	CAGTTTAGAAATCAGTCCCCAG
ENST00000231790|3|+|37020358|37020403|319|(ABE;+;@13;NG;AAG:GAG;K:E;)	ENST00000231790	319	E	CCTGCACGAGGAGAGCATCCTG
ENST00000231790|3|+|37020358|37020403|319|(ABE;+;@16;NG;AAG:GAG;K:E;)	ENST00000231790	319	E	GCACGAGGAGAGCATCCTGGAG
ENST00000231790|3|+|37020358|37020403|319|(ABE;+;@13;NGG;AAG:GAG;K:E;)	ENST00000231790	319	E	CCTGCACGAGGAGAGCATCCTGG
ENST00000231790|3|+|37025729|37025774|385|(ABE;-;@13;NG;TGT:CGT;C:R;)	ENST00000231790	385	R	TCTGTACGAACCATCTGGTGGG
ENST00000231790|3|+|37025795|37025840|407|(ABE;-;@15;NG;TAG:CAG;*:Q;)	ENST00000231790	407	Q	GGGCTGACTGGACAGGGGTTTG
ENST00000231790|3|+|37025843|37025888|423|(ABE;+;@15;NG;AGA:AGG;R:R;)	ENST00000231790	423	R	GGCAGGGCTAGGCAGCAAGATG
ENST00000231790|3|+|37025843|37025888|423|(ABE;+;@17;NG;AGA:AGG;R:R;)	ENST00000231790	423	R	CAGGGCTAGGCAGCAAGATGAG
ENST00000231790|3|+|37025843|37025888|423|(ABE;+;@17;NGG;AGA:AGG;R:R;)	ENST00000231790	423	R	CAGGGCTAGGCAGCAAGATGAGG
ENST00000231790|3|+|37025873|37025918|433|(ABE;+;@14;NG;AAA:GAA;K:E;)	ENST00000231790	433	E	ATGCTTGAACTCCCAGCCCCTG
ENST00000231790|3|+|37025897|37025942|441|(ABE;+;@13;NG;ACT:GCT;T:A;)	ENST00000231790	441	A	TGAAGTGGCTGCCAAAAATCAG
ENST00000231790|3|+|37025936|37025981|454|(ABE;+;@17;NG;AGG:GGG;R:G;)	ENST00000231790	454	G	AAGGGGACTTCAGAAATGTCAG
ENST00000231790|3|+|37028880|37028925|510|(ABE;-;@16;NG;TAG:CAG;*:Q;)	ENST00000231790	510	Q	TCCTGGAGACTCAAAACACTAG
ENST00000231790|3|+|37028901|37028946|517|(ABE;+;@13;NG;AGA:GGA;R:G;)	ENST00000231790	517	G	TGAGCAGGGACATGAGGGTACG
ENST00000231790|3|+|37040253|37040298|550|(Target-AID;+;@17;NG;CCC:CTC;P:L;)	ENST00000231790	550	L	TTCTCAACACCACCAAGCTTAG
ENST00000231790|3|+|37040253|37040298|550|(Target-AID;+;@17;NGG;CCC:CTC;P:L;)	ENST00000231790	550	L	TTCTCAACACCACCAAGCTTAGG
ENST00000231790|3|+|37040268|37040313|555|(Target-AID;+;@18;NG;CCT:CTT;P:L;)	ENST00000231790	555	L	GCTTAGGTAAATCAGCTGAGTG
ENST00000231790|3|+|37042298|37042343|574|(Target-AID;+;@19;NG;CCC:CTC;P:L;)	ENST00000231790	574	L	CTCAGGTTATCGGTAAGTTTAG
ENST00000231790|3|+|37047506|37047551|581|(ABE;-;@13;NGG;CTG:CCG;L:P;)	ENST00000231790	581	P	AAAGAGCGGTGCTGGCTCCTAGG
ENST00000231790|3|+|37047506|37047551|581|(ABE;-;@14;NG;CTG:CCG;L:P;)	ENST00000231790	581	P	AAGAGCGGTGCTGGCTCCTAGG
ENST00000231790|3|+|37047506|37047551|581|(ABE;-;@13;NG;CTG:CCG;L:P;)	ENST00000231790	581	P	AAAGAGCGGTGCTGGCTCCTAG
ENST00000231790|3|+|37047509|37047554|582|(Target-AID;+;@19;NG;CCC:CTC;P:L;)	ENST00000231790	582	L	CTCTTTGACCTTGCCATGCTTG
ENST00000231790|3|+|37047587|37047632|608|(ABE;-;@14;NGG;GTT:GCT;V:A;)	ENST00000231790	608	A	TATTCAGCAAGTCCTTCTTTGGG
ENST00000231790|3|+|37047587|37047632|608|(ABE;-;@13;NGG;GTT:GCT;V:A;)	ENST00000231790	608	A	GTATTCAGCAAGTCCTTCTTTGG
ENST00000231790|3|+|37047587|37047632|608|(ABE;-;@14;NG;GTT:GCT;V:A;)	ENST00000231790	608	A	TATTCAGCAAGTCCTTCTTTGG
ENST00000231790|3|+|37047587|37047632|608|(ABE;-;@13;NG;GTT:GCT;V:A;)	ENST00000231790	608	A	GTATTCAGCAAGTCCTTCTTTG
ENST00000231790|3|+|37047629|37047674|622|(Target-AID;+;@18;NG;CCT:CTT;P:L;)	ENST00000231790	622	L	GCTTGCAGACTATTTCTCTTTG
ENST00000231790|3|+|37047629|37047674|622|(Target-AID;+;@18;NGG;CCT:CTT;P:L;)	ENST00000231790	622	L	GCTTGCAGACTATTTCTCTTTGG
ENST00000231790|3|+|37048510|37048555|638|(ABE;+;@13;NG;AGA:GGA;R:G;)	ENST00000231790	638	G	CCTGATTGGATTACCCCTTCTG
ENST00000231790|3|+|37048510|37048555|638|(ABE;+;@17;NG;AGA:GGA;R:G;)	ENST00000231790	638	G	ATTGGATTACCCCTTCTGATTG
ENST00000231790|3|+|37048558|37048603|654|(ABE;-;@17;NGG;CTT:CCT;L:P;)	ENST00000231790	654	P	ATAGGCAGTCCCTCCAAAGGGGG
ENST00000231790|3|+|37048558|37048603|654|(ABE;-;@15;NGG;CTT:CCT;L:P;)	ENST00000231790	654	P	AGATAGGCAGTCCCTCCAAAGGG
ENST00000231790|3|+|37048558|37048603|654|(ABE;-;@17;NG;CTT:CCT;L:P;)	ENST00000231790	654	P	ATAGGCAGTCCCTCCAAAGGGG
ENST00000231790|3|+|37048558|37048603|654|(ABE;-;@15;NG;CTT:CCT;L:P;)	ENST00000231790	654	P	AGATAGGCAGTCCCTCCAAAGG
ENST00000231790|3|+|37048573|37048618|659|(ABE;-;@13;NGG;TGA:CGA;*:R;)	ENST00000231790	659	R	GCTAGTCGAAGAATGAAGATAGG
ENST00000231790|3|+|37048573|37048618|659|(ABE;-;@14;NG;TGA:CGA;*:R;)	ENST00000231790	659	R	CTAGTCGAAGAATGAAGATAGG
ENST00000231790|3|+|37048573|37048618|659|(ABE;-;@13;NG;TGA:CGA;*:R;)	ENST00000231790	659	R	GCTAGTCGAAGAATGAAGATAG
ENST00000231790|3|+|37048585|37048630|663|(Target-AID;-;@19;NG;GGG:GAG;G:E;)	ENST00000231790	663	E	CTCAGTGGCTAGTCGAAGAATG
ENST00000231790|3|+|37048585|37048630|663|(ABE;+;@15;NG;GAA:GAG;E:E;)	ENST00000231790	663	E	ACTGAGGTCAGTGATCAAGCAG
ENST00000231790|3|+|37048888|37048933|666|(ABE;+;@17;NG;TAG:TGG;*:W;)	ENST00000231790	666	W	ATTGGGACGAAGAAAAGGAATG
ENST00000231790|3|+|37048888|37048933|666|(ABE;+;@16;NG;TGA:TGG;*:W;)	ENST00000231790	666	W	ATTGGGACGAAGAAAAGGAATG
ENST00000231790|3|+|37048930|37048975|680|(ABE;-;@13;NGG;TGT:TGC;C:C;)	ENST00000231790	680	C	ACATAGCGCATTCTTTACTGAGG
ENST00000231790|3|+|37048930|37048975|680|(ABE;-;@14;NG;TGT:TGC;C:C;)	ENST00000231790	680	C	CATAGCGCATTCTTTACTGAGG
ENST00000231790|3|+|37048930|37048975|680|(ABE;-;@13;NG;TGT:TGC;C:C;)	ENST00000231790	680	C	ACATAGCGCATTCTTTACTGAG
ENST00000231790|3|+|37048951|37048996|687|(ABE;-;@16;NG;TGG:CGG;W:R;)	ENST00000231790	687	R	TTCCGGATGGAATAGAACATAG
ENST00000231790|3|+|37048960|37049005|690|(ABE;-;@14;NGG;TAT:TAC;Y:Y;)	ENST00000231790	690	Y	AGATATGTACTGCTTCCGGATGG
ENST00000231790|3|+|37048960|37049005|690|(ABE;-;@14;NG;TAT:TAC;Y:Y;)	ENST00000231790	690	Y	AGATATGTACTGCTTCCGGATG
ENST00000231790|3|+|37048993|37049038|701|(ABE;-;@13;NG;TAG:CAG;*:Q;)	ENST00000231790	701	Q	TGTACCTGCTGGCCTGAGAGGG
ENST00000231790|3|+|37050500|37050545|714|(ABE;+;@16;NG;TAG:TGG;*:W;)	ENST00000231790	714	W	AAGTGGACTGTGGAACACATTG
ENST00000231790|3|+|37050500|37050545|714|(ABE;+;@15;NG;TGA:TGG;*:W;)	ENST00000231790	714	W	AAGTGGACTGTGGAACACATTG
ENST00000231790|3|+|37050605|37050650|749|(Target-AID;+;@17;NG;CCA:CTA;P:L;)	ENST00000231790	749	L	ATCTATACAAAGTCTTTGAGAG
ENST00000231790|3|+|37050605|37050650|749|(Target-AID;+;@18;NG;CCA:CTA;P:L;)	ENST00000231790	749	L	TCTATACAAAGTCTTTGAGAGG
ENST00000231790|3|+|37050605|37050650|749|(Target-AID;+;@17;NGG;CCA:CTA;P:L;)	ENST00000231790	749	L	ATCTATACAAAGTCTTTGAGAGG
ENST00000233072|2|+|210579707|210579752|163|(ABE;+;@16;NG;AGA:GGA;R:G;)	ENST00000233072	163	G	TTATGGAGTGGACACAAGAATG
ENST00000233146|2|+|47403197|47403242|10|(ABE;-;@17;NG;TAG:CAG;*:Q;)	ENST00000233146	10	Q	ACTGCAGCGTCTCCTTCGGCTG
ENST00000233146|2|+|47403197|47403242|10|(ABE;-;@14;NG;TAG:CAG;*:Q;)	ENST00000233146	10	Q	CCAACTGCAGCGTCTCCTTCGG
ENST00000233146|2|+|47403335|47403380|56|(ABE;+;@16;NG;AAG:GAG;K:E;)	ENST00000233146	56	E	CCGGGAGGTGTTCAAGACCCAG
ENST00000233146|2|+|47403335|47403380|56|(ABE;+;@17;NG;AAG:GAG;K:E;)	ENST00000233146	56	E	CGGGAGGTGTTCAAGACCCAGG
ENST00000233146|2|+|47403335|47403380|56|(ABE;+;@16;NGG;AAG:GAG;K:E;)	ENST00000233146	56	E	CCGGGAGGTGTTCAAGACCCAGG
ENST00000233146|2|+|47403335|47403380|56|(ABE;+;@17;NGG;AAG:GAG;K:E;)	ENST00000233146	56	E	CGGGAGGTGTTCAAGACCCAGGG
ENST00000233146|2|+|47403365|47403410|66|(ABE;-;@17;NGG;TAT:TAC;Y:Y;)	ENST00000233146	66	Y	CATGTACTTGATCACCCCCTGGG
ENST00000233146|2|+|47403365|47403410|66|(ABE;-;@16;NGG;TAT:TAC;Y:Y;)	ENST00000233146	66	Y	CCATGTACTTGATCACCCCCTGG
ENST00000233146|2|+|47403365|47403410|66|(ABE;-;@17;NG;TAT:TAC;Y:Y;)	ENST00000233146	66	Y	CATGTACTTGATCACCCCCTGG
ENST00000233146|2|+|47403365|47403410|66|(ABE;-;@16;NG;TAT:TAC;Y:Y;)	ENST00000233146	66	Y	CCATGTACTTGATCACCCCCTG
ENST00000233146|2|+|47408501|47408546|112|(ABE;-;@15;NG;TCT:TCC;S:S;)	ENST00000233146	112	S	TCCTTGGATGCCTTATTTCCAG
ENST00000233146|2|+|47410234|47410279|177|(ABE;+;@14;NG;AAA:GAA;K:E;)	ENST00000233146	177	E	CTGTGTGAATTCCCTGATAATG
ENST00000233146|2|+|47410264|47410309|187|(Target-AID;+;@18;NG;CCT:CTT;P:L;)	ENST00000233146	187	L	TCTTGAGGCTCTCCTCATCCAG
ENST00000233146|2|+|47410282|47410327|193|(ABE;-;@17;NG;TAG:CAG;*:Q;)	ENST00000233146	193	Q	TCTGGATGAGGAGAGCCTCAAG
ENST00000233146|2|+|47410315|47410360|204|(ABE;+;@14;NG;AGA:GGA;R:G;)	ENST00000233146	204	G	CCCGGAGGAGAGACTGCTGGAG
ENST00000233146|2|+|47412461|47412506|239|(ABE;-;@15;NGG;TAG:CAG;*:Q;)	ENST00000233146	239	Q	GTCCTGATAAATGTCTTTTGTGG
ENST00000233146|2|+|47412461|47412506|239|(ABE;-;@15;NG;TAG:CAG;*:Q;)	ENST00000233146	239	Q	GTCCTGATAAATGTCTTTTGTG
ENST00000233146|2|+|47412536|47412581|264|(ABE;-;@13;NGG;TAG:CAG;*:Q;)	ENST00000233146	264	Q	TGTACCTGATTCTCCATTTCTGG
ENST00000233146|2|+|47412536|47412581|264|(ABE;-;@14;NG;TAG:CAG;*:Q;)	ENST00000233146	264	Q	GTACCTGATTCTCCATTTCTGG
ENST00000233146|2|+|47412536|47412581|264|(ABE;-;@13;NG;TAG:CAG;*:Q;)	ENST00000233146	264	Q	TGTACCTGATTCTCCATTTCTG
ENST00000233146|2|+|47412536|47412581|264|(ABE;+;@17;NG;CAA:CAG;Q:Q;)	ENST00000233146	264	Q	TCAGGTACATGGATTATAAATG
ENST00000233146|2|+|47414346|47414391|298|(ABE;-;@13;NG;TAG:CAG;*:Q;)	ENST00000233146	298	Q	ATATACTGGCTGAAGTCAAAAG
ENST00000233146|2|+|47416313|47416358|328|(ABE;-;@17;NG;GCT:GCC;A:A;)	ENST00000233146	328	A	CAAGGCAGCCAGAGACTGAGAG
ENST00000233146|2|+|47416328|47416373|333|(ABE;+;@14;NG;TAT:TGT;Y:C;)	ENST00000233146	333	C	ATAAGTGTAAAACCCCTCAAGG
ENST00000233146|2|+|47416352|47416397|341|(Target-AID;+;@18;NG;CCT:CTT;P:L;)	ENST00000233146	341	L	ACTTGTTAACCAGTGGATTAAG
ENST00000233146|2|+|47416361|47416406|344|(ABE;-;@14;NG;TAG:CAG;*:Q;)	ENST00000233146	344	Q	TCCACTGGTTAACAAGTCTTTG
ENST00000233146|2|+|47416376|47416421|349|(ABE;-;@15;NGG;CTT:CCT;L:P;)	ENST00000233146	349	P	TGAGAGGCTGCTTAATCCACTGG
ENST00000233146|2|+|47416376|47416421|349|(ABE;-;@16;NG;CTT:CCT;L:P;)	ENST00000233146	349	P	GAGAGGCTGCTTAATCCACTGG
ENST00000233146|2|+|47416376|47416421|349|(ABE;-;@15;NG;CTT:CCT;L:P;)	ENST00000233146	349	P	TGAGAGGCTGCTTAATCCACTG
ENST00000233146|2|+|47429808|47429853|389|(ABE;-;@17;NG;TGA:CGA;*:R;)	ENST00000233146	389	R	GTCGGTTAAGATCTGGGAATCG
ENST00000233146|2|+|47429826|47429871|395|(ABE;-;@14;NG;TAA:CAA;*:Q;)	ENST00000233146	395	Q	GTCTTTGAAACTTCTTGGCAAG
ENST00000233146|2|+|47429880|47429925|413|(ABE;-;@17;NG;TAA:CAA;*:Q;)	ENST00000233146	413	Q	GTTGATTTATACCCTGATAGAG
ENST00000233146|2|+|47429880|47429925|413|(ABE;-;@15;NG;TAA:CAA;*:Q;)	ENST00000233146	413	Q	TAGTTGATTTATACCCTGATAG
ENST00000233146|2|+|47445543|47445588|432|(ABE;+;@14;NG;TTA:TTG;L:L;)	ENST00000233146	432	L	ATTATTGTTGGCAGTTTTTGTG
ENST00000233146|2|+|47445633|47445678|462|(ABE;-;@16;NG;TAG:CAG;*:Q;)	ENST00000233146	462	Q	ACCTGATCCATATCTAAAGTTG
ENST00000233146|2|+|47445633|47445678|462|(ABE;-;@13;NG;TAG:CAG;*:Q;)	ENST00000233146	462	Q	CATACCTGATCCATATCTAAAG
ENST00000233146|2|+|47463099|47463144|493|(ABE;-;@15;NG;TAG:CAG;*:Q;)	ENST00000233146	493	Q	TGACTGCATCTTCTTTTCCAAG
ENST00000233146|2|+|47466677|47466722|518|(ABE;-;@14;NG;TAG:CAG;*:Q;)	ENST00000233146	518	Q	CAAACTGTGCACTGGAATCCAG
ENST00000233146|2|+|47471016|47471061|579|(Target-AID;-;@17;NGG;AAG:AAA;K:K;)	ENST00000233146	579	K	TTCTTTAACAATGGCATCCTGGG
ENST00000233146|2|+|47471016|47471061|579|(Target-AID;-;@18;NG;AAG:AAA;K:K;)	ENST00000233146	579	K	TCTTTAACAATGGCATCCTGGG
ENST00000233146|2|+|47471016|47471061|579|(Target-AID;-;@17;NG;AAG:AAA;K:K;)	ENST00000233146	579	K	TTCTTTAACAATGGCATCCTGG
ENST00000233146|2|+|47475020|47475065|593|(ABE;-;@15;NG;TAG:CAG;*:Q;)	ENST00000233146	593	Q	TGTCTGCATTGGTTCTACATAG
ENST00000233146|2|+|47475044|47475089|601|(ABE;-;@17;NG;TAG:CAG;*:Q;)	ENST00000233146	601	Q	GCTGAGCTAACACATCATTGAG
ENST00000233146|2|+|47475044|47475089|601|(ABE;-;@15;NG;TAG:CAG;*:Q;)	ENST00000233146	601	Q	TAGCTGAGCTAACACATCATTG
ENST00000233146|2|+|47475104|47475149|621|(ABE;-;@16;NG;TGA:CGA;*:R;)	ENST00000233146	621	R	GGTCGTACATATGGAACAGGTG
ENST00000233146|2|+|47475128|47475173|629|(Target-AID;-;@17;NG;CGA:CAA;R:Q;)	ENST00000233146	629	Q	CCTTGTCCTTTCTCCAAAATGG
ENST00000233146|2|+|47476398|47476443|687|(Target-AID;+;@17;NG;CCC:CTC;P:L;)	ENST00000233146	687	L	TACTCATGGCCCAAATTGGGTG
ENST00000233146|2|+|47476428|47476473|697|(ABE;+;@13;NG;TAT:TGT;Y:C;)	ENST00000233146	697	C	GTGCCATGTGAGTCAGCAGAAG
ENST00000233146|2|+|47476428|47476473|697|(ABE;+;@15;NG;TAT:TGT;Y:C;)	ENST00000233146	697	C	GCCATGTGAGTCAGCAGAAGTG
ENST00000233146|2|+|47478437|47478482|800|(ABE;-;@13;NGG;TTA:CTA;L:L;)	ENST00000233146	800	L	ACATGTAGATTATTAACAGTTGG
ENST00000233146|2|+|47478437|47478482|800|(ABE;-;@13;NG;TTA:CTA;L:L;)	ENST00000233146	800	L	ACATGTAGATTATTAACAGTTG
ENST00000233146|2|+|47478485|47478530|816|(ABE;-;@15;NGG;TAG:CAG;*:Q;)	ENST00000233146	816	Q	CACCTGATAAAGCATAGTTAAGG
ENST00000233146|2|+|47478485|47478530|816|(ABE;-;@15;NG;TAG:CAG;*:Q;)	ENST00000233146	816	Q	CACCTGATAAAGCATAGTTAAG
ENST00000233146|2|+|47480793|47480838|860|(ABE;-;@15;NG;TTG:TCG;L:S;)	ENST00000233146	860	S	CTTGCGATTCTCCAATATACTG
ENST00000233146|2|+|47480796|47480841|861|(ABE;-;@17;NG;TAA:CAA;*:Q;)	ENST00000233146	861	Q	CTTGCGATTCTCCAATATACTG
ENST00000233146|2|+|47482757|47482802|879|(ABE;-;@17;NG;TAA:CAA;*:Q;)	ENST00000233146	879	Q	CTTGCTGAAACACATGTGAATG
ENST00000233596|19|+|1496296|1496341|128|(ABE;-;@13;NG;CTC:CCC;L:P;)	ENST00000233596	128	P	GTTCCAGGGCCTGGGAGCCATG
ENST00000233596|19|+|1496317|1496362|135|(Target-AID;+;@17;NG;CCG:CTG;P:L;)	ENST00000233596	135	L	TGCTGTATCAGCGCGTCGTGCG
ENST00000233627|19|+|1391121|1391166|145|(ABE;+;@16;NG;CAC:CGC;H:R;)	ENST00000233627	145	R	CCGCGCTACGTGGTCTCCATGG
ENST00000233627|19|+|1391121|1391166|145|(ABE;+;@17;NG;CAC:CGC;H:R;)	ENST00000233627	145	R	CGCGCTACGTGGTCTCCATGGG
ENST00000233627|19|+|1391121|1391166|145|(ABE;+;@16;NGG;CAC:CGC;H:R;)	ENST00000233627	145	R	CCGCGCTACGTGGTCTCCATGGG
ENST00000233627|19|+|1391121|1391166|145|(ABE;+;@17;NGG;CAC:CGC;H:R;)	ENST00000233627	145	R	CGCGCTACGTGGTCTCCATGGGG
ENST00000234071|2|+|127421314|127421359|42|(ABE;+;@15;NG;CAT:CGT;H:R;)	ENST00000234071	42	R	CAAACGTGCCAACTCCTTCCTG
ENST00000234071|2|+|127421314|127421359|42|(ABE;+;@15;NGG;CAT:CGT;H:R;)	ENST00000234071	42	R	CAAACGTGCCAACTCCTTCCTGG
ENST00000234071|2|+|127421416|127421461|76|(ABE;+;@15;NG;ATG:GTG;M:V;)	ENST00000234071	76	V	AAAATGTGGATGACACAGTAAG
ENST00000234071|2|+|127421416|127421461|76|(ABE;+;@15;NGG;ATG:GTG;M:V;)	ENST00000234071	76	V	AAAATGTGGATGACACAGTAAGG
ENST00000234071|2|+|127426155|127426200|210|(ABE;+;@13;NG;CCA:CCG;P:P;)	ENST00000234071	210	P	TAGATCCGCGGCTCATTGATGG
ENST00000234071|2|+|127426155|127426200|210|(ABE;+;@13;NGG;CCA:CCG;P:P;)	ENST00000234071	210	P	TAGATCCGCGGCTCATTGATGGG
[truncated: 34,094 more rows]

## Sheet: nucleotide mutations; create
guide: id	genome coordinate	nucleotide mutation	guide+PAM sequence
[truncated: 22,590 more rows]

## Sheet: nucleotide mutations; remove
guide: id	genome coordinate	nucleotide mutation	guide+PAM sequence
[truncated: 23,450 more rows]
